# Supplementary material for: Identifying potential biases in code sequences in primary care electronic healthcare records: a retrospective cohort study of the determinants of code frequency
Source: PubMed Central journal article supplement (PMC10537851; doi:10.1136/bmjopen-2023-072884), 2023-09-27
Supplement: bmjopen-2023-072884.draft_revisions.pdf [file bmjopen-2023-072884.draft_revisions.pdf]

# BMJ Open

BMJ Open is committed to open peer review. As part of this commitment we make the peer review history of every article we publish publicly available.

When an article is published we post the peer reviewers' comments and the authors' responses online. We also post the versions of the paper that were used during peer review. These are the versions that the peer review comments apply to.

The versions of the paper that follow are the versions that were submitted during the peer review process. They are not the versions of record or the final published versions. They should not be cited or distributed as the published version of this manuscript.

BMJ Open is an open access journal and the full, final, typeset and author-corrected version of record of the manuscript is available on our site with no access controls, subscription charges or pay-per-view fees (<http://bmjopen.bmj.com>).

If you have any questions on BMJ Open's open peer review process please email [info.bmjopen@bmj.com](mailto:info.bmjopen@bmj.com)

# BMJ Open

## Determinants of disease code frequency in the primary care electronic healthcare record: a retrospective cohort study

|                               |                                                                                                                                                                                                                                                                                                                                                                                                                                                                                                                                                                                                                                                                                                                                                                                                                                                                   |
|-------------------------------|-------------------------------------------------------------------------------------------------------------------------------------------------------------------------------------------------------------------------------------------------------------------------------------------------------------------------------------------------------------------------------------------------------------------------------------------------------------------------------------------------------------------------------------------------------------------------------------------------------------------------------------------------------------------------------------------------------------------------------------------------------------------------------------------------------------------------------------------------------------------|
| Journal:                      | <i>BMJ Open</i>                                                                                                                                                                                                                                                                                                                                                                                                                                                                                                                                                                                                                                                                                                                                                                                                                                                   |
| Manuscript ID                 | bmjopen-2023-072884                                                                                                                                                                                                                                                                                                                                                                                                                                                                                                                                                                                                                                                                                                                                                                                                                                               |
| Article Type:                 | Original research                                                                                                                                                                                                                                                                                                                                                                                                                                                                                                                                                                                                                                                                                                                                                                                                                                                 |
| Date Submitted by the Author: | 16-Feb-2023                                                                                                                                                                                                                                                                                                                                                                                                                                                                                                                                                                                                                                                                                                                                                                                                                                                       |
| Complete List of Authors:     | <p>Beaney, Thomas; Imperial College London, Department of Primary Care and Public Health; Imperial College London, Department of Mathematics</p> <p>Clarke, Jonathan; Imperial College of Science Technology and Medicine, Institute of Global Health Innovation</p> <p>Salman, David; Imperial College London Department of Primary Care and Public Health; Imperial College London Faculty of Medicine, MSk lab</p> <p>Woodcock, Thomas; Imperial College London, Department of Primary Care and Public Health</p> <p>Majeed, Azeem; Imperial College London, Department of Primary Care and Public Health</p> <p>Barahona, Mauricio; Imperial College London, Centre for Mathematics of Precision Healthcare; Imperial College London, Department of Mathematics</p> <p>Aylin, Paul; Imperial College London, Department of Primary Care and Public Health</p> |
| Keywords:                     | EPIDEMIOLOGY, Primary Health Care, Health informatics < BIOTECHNOLOGY & BIOINFORMATICS, STATISTICS & RESEARCH METHODS                                                                                                                                                                                                                                                                                                                                                                                                                                                                                                                                                                                                                                                                                                                                             |
|                               |                                                                                                                                                                                                                                                                                                                                                                                                                                                                                                                                                                                                                                                                                                                                                                                                                                                                   |

SCHOLARONE™  
Manuscripts

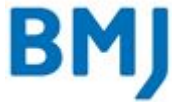

I, the Submitting Author has the right to grant and does grant on behalf of all authors of the Work (as defined in the below author licence), an exclusive licence and/or a non-exclusive licence for contributions from authors who are: i) UK Crown employees; ii) where BMJ has agreed a CC-BY licence shall apply, and/or iii) in accordance with the terms applicable for US Federal Government officers or employees acting as part of their official duties; on a worldwide, perpetual, irrevocable, royalty-free basis to BMJ Publishing Group Ltd ("BMJ") its licensees and where the relevant Journal is co-owned by BMJ to the co-owners of the Journal, to publish the Work in this journal and any other BMJ products and to exploit all rights, as set out in our [licence](#).

The Submitting Author accepts and understands that any supply made under these terms is made by BMJ to the Submitting Author unless you are acting as an employee on behalf of your employer or a postgraduate student of an affiliated institution which is paying any applicable article publishing charge ("APC") for Open Access articles. Where the Submitting Author wishes to make the Work available on an Open Access basis (and intends to pay the relevant APC), the terms of reuse of such Open Access shall be governed by a Creative Commons licence – details of these licences and which [Creative Commons](#) licence will apply to this Work are set out in our licence referred to above.

Other than as permitted in any relevant BMJ Author's Self Archiving Policies, I confirm this Work has not been accepted for publication elsewhere, is not being considered for publication elsewhere and does not duplicate material already published. I confirm all authors consent to publication of this Work and authorise the granting of this licence.

1  
2  
3 **Determinants of disease code frequency in the primary care electronic healthcare**  
4 **record: a retrospective cohort study**  
5  
6  
7

8 Beaney T<sup>1,2</sup> (0000-0001-9709-7264), Clarke J<sup>2</sup>, Salman D<sup>1,3</sup>, Woodcock T<sup>1</sup>, Majeed A<sup>1</sup>,  
9 Barahona M<sup>2</sup>, Aylin P<sup>1</sup>  
10  
11

- 12  
13  
14 1. Department of Primary Care and Public Health, Imperial College London, London,  
15 W6 8RP, United Kingdom  
16  
17 2. Centre for Mathematics of Precision Healthcare, Department of Mathematics,  
18 Imperial College London, London, SW7 2AZ, United Kingdom  
19  
20 3. MSk Lab, Department of Surgery and Cancer, Faculty of Medicine, Imperial College  
21 London, London, UK  
22  
23  
24

25 Word count: 3,840  
26  
27  
28  
29

30 Corresponding Author:  
31

32 Dr Thomas Beaney  
33

34 Department of Primary Care and Public Health, Imperial College London, London, W6 8RP,  
35 United Kingdom  
36

37 Email: [thomas.beaney@imperial.ac.uk](mailto:thomas.beaney@imperial.ac.uk)  
38  
39  
40  
41  
42  
43  
44  
45  
46  
47  
48  
49  
50  
51  
52  
53  
54  
55  
56  
57  
58  
59  
60

## Abstract

### Objectives

To determine whether the frequency of diagnostic codes in primary care electronic health records (EHRs) is associated with i) disease coding incentives, ii) GP practice, iii) patient socio-demographic characteristics and iv) calendar year of diagnosis.

### Design

Retrospective cohort study.

### Setting

General practices in England from 2015 to 2022 contributing to the Clinical Practice Research Datalink Aurum dataset.

### Participants

All patients registered to a GP with at least one incident disease diagnosed between 01/01/2015 and 31/12/2019.

### Primary and secondary outcome measures

The number of diagnostic codes for a condition in i) the first and ii) the second year following diagnosis, stratified by inclusion in the Quality and Outcomes Framework (QOF) financial incentive programme.

### Results

3,113,724 patients were included, with 7,723,365 incident diseases. Conditions included in QOF had higher rates of annual coding than conditions not included in QOF (1.03 vs 0.32 per year,  $p < 0.0001$ ). There was significant variation in code frequency by GP practice which was not explained by patient socio-demographics. We found significant associations with patient socio-demographics, with a trend towards lower coding rates in people living in areas of higher deprivation for both QOF and non-QOF conditions. Code frequency was lower for conditions with follow-up time in 2020, associated with the onset of the COVID-19 pandemic.

### Conclusions

Code frequency for newly diagnostic diseases was strongly associated with patient socio-demographics, disease inclusion in QOF, GP practice, as well as with the onset of the COVID-19 pandemic. Methods using disease sequences in structured data should consider accounting for these factors to reduce potential bias.

### Strengths and limitations

This study used a large and representative sample of patients in England and included 208 clinical conditions. However, we could not determine whether differences in code frequency represent true differences in clinical need.

For peer review only

## Background

Methods developed in natural language processing (NLP) are increasingly being employed to analyse high dimensional healthcare data, such as data recorded during clinical encounters in the Electronic Healthcare Record (EHR).<sup>1-5</sup> These methods show promise across a range of tasks, including prediction of health outcomes, or in clustering of similar diseases.<sup>6-8</sup> Although designed for the analysis of free text data as found in ‘unstructured’ medical records, NLP methods can also be applied to the coded or ‘structured’ data, such as the SNOMED-CT or ICD terminologies commonly found in many EHR databases. Unlike many cross-sectional approaches, these methods make explicit use of repeated codes in the record: the sequence of codes can be regarded analogous to a sentence or document of words representing a person’s life course, although without the same syntactic and semantic rules of natural language.<sup>5</sup> The continued evolution of transformer-based models opens up the possibility to determine the similarity between people and diseases based not only on co-occurrence of disease, as has been done in the past,<sup>9</sup> but on the sequence of disease acquisition,<sup>2,5,10</sup> which may be particularly relevant when considering preventive approaches or identifying opportunities for shared management.

In the structured medical record in primary care, a diagnostic code is presumed to indicate presentation by a patient for that condition. However, it may not be a fully objective indicator of the content of a presentation but is likely influenced by patient characteristics as well as the preferences and incentives of the clinician entering data and organisational policies; factors which may vary over time.<sup>11,12</sup> In England, the Quality and Outcomes Framework (QOF) was introduced in the National Health Service for General Practices (GPs) in 2004, providing financial incentives for meeting targets for a set of chronic conditions, including regular clinical reviews, and has been credited with improvements to data collection for these conditions.<sup>13,14</sup> Codes for conditions in QOF may occur more frequently than for conditions not included in the incentive scheme, which could affect sequence-based methods using recurrent codes.

Biases in coding may result in analytical models representing some people better than others, but little is known about the comparative frequency of medical codes for different long-term conditions (LTCs) or determinants of frequency in the primary care EHR. This study aims to compare the frequency of codes for a common set of LTCs and to determine whether coding

1  
2  
3 frequency varies according to i) disease inclusion in QOF, ii) GP practice, iii) patient socio-  
4 demographic characteristics, and iv) calendar year of diagnosis.  
5  
6  
7  
8  
9

## 10 **Methods**

### 11 **Data source**

12  
13  
14 This study used data from the Clinical Practice Research Datalink (CPRD) Aurum dataset,  
15 which contains primary care data for GP practices using EMIS Web software.<sup>15</sup> We included  
16 all research acceptable patients with a continuous period of registration at a GP practice in  
17 CPRD between 1<sup>st</sup> January 2014 and 31<sup>st</sup> December 2020. Patients were eligible if aged 18  
18 years or over with at least one incident disease diagnosed between 1<sup>st</sup> January 2015 and 31<sup>st</sup>  
19 December 2019, allowing for at least one full year of practice registration before disease  
20 diagnosis and at least one full year of follow-up for each condition. We focussed on incident  
21 diseases to reduce the potential for confounding from historic conditions, some of which may  
22 no longer be active. Patients were followed up until the earliest of death, de-registration or  
23 the date of latest data extraction from their GP practice. Further information on the cohort  
24 structure is given in the appendix (p2).  
25  
26  
27  
28  
29  
30  
31  
32  
33  
34  
35

### 36 **Disease definitions**

37 We included a total of 208 LTCs. These were defined based on a set of disease codes from  
38 Head *et al* (2021), who selected 211 chronic conditions from 308 acute and chronic disease  
39 phenotypes developed for the CALIBER study.<sup>16,17</sup> We reviewed codes and made changes to  
40 the code-lists for diabetes and added a new condition of 'chronic primary pain' (see appendix  
41 p2-3). We excluded conditions based only on laboratory results or anthropometric  
42 measurement codes as these may have different characteristics of coding frequency. As a  
43 result, measures of raised cholesterol used in the original CALIBER study were excluded.  
44 We also excluded BMI and eGFR measurements but included the diagnostic codes for  
45 obesity and Chronic Kidney Disease. We considered a single code as diagnostic for each  
46 condition and defined the diagnosis date for each condition as the date of the earliest code for  
47 that condition. Diseases were stratified according to whether they appeared in QOF by two  
48 primary care clinicians, TB and DS (see appendix p2-3).  
49  
50  
51  
52  
53  
54  
55  
56  
57  
58  
59  
60



## Statistical analysis

### Descriptive statistics

For each disease newly diagnosed during the study period, we calculated the yearly number of subsequent codes (excluding the first code representing diagnosis) during follow-up:

$$y_i = \frac{\sum_{j=1}^N c_{i,j}}{\sum_{j=1}^N f_{i,j}}$$

where  $y_i$  is the yearly number of codes following diagnosis for condition  $i$ ,  $c_{i,j}$  is the count of codes for condition  $i$  in patient  $j$ , and  $f_{i,j}$  is the number of years of follow-up for condition  $i$  in patient  $j$ . T-tests were used to compare the mean yearly number of codes for QOF versus non-QOF conditions.

To examine variation in disease coding frequency by GP practice, we calculated, for each practice  $k$ , the mean number of codes per year for newly diagnosed diseases,  $p_k$ :

$$p_k = \frac{\sum_{j=1}^N \sum_{i=1}^M c_{i,j,k}}{\sum_{j=1}^N \sum_{i=1}^M f_{i,j,k}}$$

where  $c_{i,j,k}$  is the count of codes for condition  $i$  in patient  $j$  in practice  $k$ , and  $f_{i,j,k}$  is the number of years of follow-up for condition  $i$  in patient  $j$  in practice  $k$ . We then calculated the Pearson correlation coefficient between the mean number of codes per year in each practice for QOF versus non-QOF conditions. We also compared the mean number of yearly codes in each practice stratified by the 2019 Index of Multiple Deprivation (IMD) decile of the GP practice.<sup>18</sup> For conditions with at least two years of follow-up after the date of diagnosis, we calculated the ratio of the number of codes in the first year of diagnosis to the number of codes in subsequent years.

### Regression analyses

Data were formatted as panel data with patients measured over multiple calendar years (appendix Table A1). We used mixed effects negative binomial regression to analyse the association between code frequency of newly diagnosed conditions in i) the first year following diagnosis and ii) the second year following diagnosis, with patient factors and calendar year of diagnosis. We separated the outcome variable (code frequency) into first and second year after diagnosis due to preliminary analyses indicating significant differences over time. We also stratified the regression analyses by QOF inclusion, given our hypothesis that

1  
2  
3 it may be an effect modifier of the relationships. To account for cases where a patient may  
4 have more than one QOF or non-QOF condition diagnosed within the same year, we  
5 averaged the code frequency for all newly diagnosed QOF or non-QOF conditions in each  
6  
7  
8  
9  
10  
11  
12  
13  
14  
15  
16  
17  
18  
19  
20  
21  
22  
23  
24  
25  
26  
27  
28  
29  
30  
31  
32  
33  
34  
35  
36  
37  
38  
39  
40  
41  
42  
43  
44  
45  
46  
47  
48  
49  
50  
51  
52  
53  
54  
55  
56  
57  
58  
59  
60

Included as covariates in the model were patient socio-demographic factors including age, sex, ethnicity and IMD decile of residence. We also included the count of QOF and non-QOF conditions for each patient. Due to small numbers, we excluded patients with gender recorded in CPRD as 'indeterminate' or with missing IMD deciles. Age and the count of QOF and non-QOF conditions were time-updated at the start of each calendar year, and other covariates were held fixed. We incorporated random effects for patient and fixed effects for calendar year as we wished to explicitly model the effect of time. Use of a Poisson model was considered, but the conditional variance was found to be significantly higher than the conditional mean ( $p < 0.001$ ) indicating a negative binomial to have better fit.<sup>19</sup> Model fit was assessed by calculating randomized quantile residuals, which indicated no departure from normality on quantile-quantile plots.<sup>20,21</sup>

For each regression model, we calculated the predicted count of disease codes for each patient per year and then calculated the mean for each GP practice. This indicated that significant variation remained in the mean counts according to GP practice (appendix Figure A1). We therefore incorporated fixed effects for GP practice within the regression models to account for practice-level variation (see appendix p5 for model equation). We also compared the Akaike Information Criteria (AIC) of models with and without practice fixed effects.

To assess whether code frequency was a function of overall number of primary care consultations, we conducted a sensitivity analysis including average number of yearly consultations (irrespective of condition) in year 1 or year 2 added as a covariate into the main regression models (categorised into <1, 1-2, 3-4, 5-9 or 10 or more). Python version 3.10.6 and Pandas version 1.4.3 were used in data processing and plots and Stata version 17.0 and R studio version 4.2.1 were used for regression analyses.

## **Patient and Public Involvement**

1  
2  
3 This research programme is supported by a patient and public advisory group who fed back  
4 to the researchers on the diseases included in the study but were not directly involved in this  
5 study.  
6  
7  
8  
9  
10  
11  
12  
13  
14  
15  
16  
17  
18  
19  
20  
21  
22  
23  
24  
25  
26  
27  
28  
29  
30  
31  
32  
33  
34  
35  
36  
37  
38  
39  
40  
41  
42  
43  
44  
45  
46  
47  
48  
49  
50  
51  
52  
53  
54  
55  
56  
57  
58  
59  
60

For peer review only

## Results

A total of 6,174,115 patients aged 18 years or over and with a continuous registration period between 1<sup>st</sup> January 2014 and 31<sup>st</sup> December 2020 were eligible for inclusion in the study. Of these, 3,113,724 (50.4%) had at least one incident disease diagnosed between 1<sup>st</sup> January 2015 and 31<sup>st</sup> December 2019. Characteristics of the eligible population are shown in Table 1. 21.4% of patients were aged between 18-40 years as of the study start date, and 7.0% were aged 80 years or over. There were more women than men (54.1% versus 45.9%), most (76.7%) were of White ethnicity and there were relatively more patients in more deprived IMD deciles (51.7% in the most deprived half).

**Table 1: Socio-demographic characteristics of patients included in the study**

| Patient characteristic | Total            | Percent |
|------------------------|------------------|---------|
| <b>Age (years)</b>     |                  |         |
| 18-40                  | 665,543          | 21.4%   |
| 40-49                  | 562,934          | 18.1%   |
| 50-59                  | 604,284          | 19.4%   |
| 60-69                  | 585,062          | 18.8%   |
| 70-79                  | 476,626          | 15.3%   |
| 80+                    | 219,275          | 7.0%    |
| <b>Gender</b>          |                  |         |
| Female                 | 1,684,942        | 54.1%   |
| Indeterminate          | 48               | <0.1%   |
| Male                   | 1,428,734        | 45.9%   |
| <b>Ethnicity</b>       |                  |         |
| White                  | 2,388,332        | 76.7%   |
| South Asian            | 194,477          | 6.2%    |
| Black                  | 103,504          | 3.3%    |
| Other                  | 36,430           | 1.2%    |
| Mixed                  | 27,572           | 0.9%    |
| Missing                | 363,409          | 11.7%   |
| <b>IMD decile</b>      |                  |         |
| 1 (most deprived)      | 358,948          | 11.5%   |
| 2                      | 320,042          | 10.3%   |
| 3                      | 320,340          | 10.3%   |
| 4                      | 323,782          | 10.4%   |
| 5                      | 287,114          | 9.2%    |
| 6                      | 303,798          | 9.8%    |
| 7                      | 304,044          | 9.8%    |
| 8                      | 298,185          | 9.6%    |
| 9                      | 305,563          | 9.8%    |
| 10 (least deprived)    | 290,214          | 9.3%    |
| Missing                | 1,694            | 0.1%    |
| <b>Total</b>           | <b>3,113,724</b> |         |

### Code frequency by disease and by time from diagnosis

A total of 7,723,365 diseases were diagnosed during the study period with follow-up times for each disease ranging from 1.0 to 7.2 years (mean 4.1 years). There was substantial variation in the yearly code frequency after diagnosis for each condition diagnosed during the study period. Diabetes (types 1, 2 and unspecified), polymyalgia rheumatica, motor neurone disease and dementia had the highest median number of codes per year (appendix Table A2). For many chronic diseases, yearly code frequency was low, for example, only 5% of patients with spina bifida had  $\geq 0.5$  codes per year. Conditions included in QOF on average had significantly higher mean number of yearly codes (1.03) than conditions not included in QOF (0.32;  $p < 0.0001$ ).

The number of codes was higher in the first year after diagnosis than in subsequent years for almost all conditions, except for secondary bowel or pleural malignancy and diabetic eye disease, for which code frequency was higher on average after the first year of diagnosis. QOF conditions on average had lower ratios of codes in the first compared to subsequent years than non-QOF conditions (4.8 versus 5.7 times higher in year 1). However, diseases representing major cardiovascular events, such as myocardial infarction, were coded much more frequently in the first year from diagnosis than in subsequent years (appendix Figure A2 and Figure A3).

### Variation in coding frequency by GP practice

There was a wide range in the mean yearly number of codes per condition between GP practices, with higher code frequency for QOF compared to non-QOF conditions (appendix Figure A4). There was a strong correlation ( $r = 0.88$ ) between GP practice mean code frequency for QOF and non-QOF conditions (Figure 1). There was no observed trend according to the GP practice-level IMD decile (appendix Figure A5).

### Figure 1: Scatterplot of mean yearly number of codes following diagnosis for QOF versus non-QOF conditions for each GP practice

We calculated the expected counts of codes for new diseases in year 1 and year 2 following diagnosis, predicted from negative binomial regression models. Expected mean counts per

1  
2  
3 condition at GP practice level showed substantially less variation compared to the observed  
4 mean counts for both QOF and non-QOF conditions in year 1 and year 2 (appendix Figure  
5 A1) indicating substantial residual practice level variation independent of patient socio-  
6 demographic factors.  
7  
8  
9

### 10 11 12 13 **Variation in disease frequency by socio-demographics and over time**

14 We found significant associations between code frequency in year 1 and year 2 following  
15 diagnosis with patient socio-demographic factors and calendar year of diagnosis for both  
16 QOF and non-QOF diseases from mixed effects negative binomial regression, after  
17 adjustment for number of pre-existing conditions (Figures 2 and 3, and appendix Tables A3 –  
18 A6). Inclusion of GP practice fixed effects in the regression models resulted in very similar  
19 coefficients for patient sociodemographic factors, and a significantly lower AIC indicating  
20 better model fit and so results are presented including practice-level effects.  
21  
22  
23  
24  
25  
26  
27  
28

#### 29 Associations with QOF conditions

30 Younger patients tended to have a higher frequency of codes in the first year following  
31 diagnosis compared to older patients (Figure 1). However, in the second year from diagnosis,  
32 there was a U-shaped relationship with age, with the youngest and oldest age groups having  
33 the lowest rate of codes. Males had on average a small 3% increase (95% CI: 1.03 – 1.03) in  
34 the incidence rate of codes in year 1 and 11% (95% CI: 1.11 – 1.12) increase in year 2  
35 compared with females. There was a strong relationship with ethnicity, with people of non-  
36 White ethnicities having lower rates of code frequency than people of White ethnicity in year  
37 1, but higher rates in year 2. There was a strong trend towards higher code frequency in year  
38 1 and year 2 with decreasing levels of deprivation.  
39  
40  
41  
42  
43  
44  
45  
46  
47

#### 48 Associations with non-QOF conditions

49 For conditions not included in QOF, relationships were more consistent across year 1 and  
50 year 2 following diagnosis (Figure 2). The 18–40-year age group had the highest rate of  
51 codes in both year 1 and year 2, with only small differences between other age groups. There  
52 was no difference in the rate of codes in males and females in year 1, but males had a lower  
53 rate of codes in year 2. Lower rates of codes were found in people of non-White ethnicities  
54 compared to people of White ethnicity, except for South Asian ethnicity in year 2. Similar to  
55  
56  
57  
58  
59  
60

1  
2  
3 QOF conditions, there was a strong trend towards higher code rates in year 1 and year 2 with  
4 decreasing deprivation.  
5  
6  
7

#### 8 Associations with calendar year 9

10 For both QOF and non-QOF conditions, code rates were similar for conditions diagnosed in  
11 2016 and 2017 compared with 2015 (Figures 1 and 2). For codes in year 1, rates for  
12 conditions diagnosed in 2018 were similar to 2015, but rates for diseases diagnosed in 2019  
13 were 5% and 6% lower than 2015 for QOF and non-QOF conditions, respectively. For codes  
14 in year 2, rates were significantly lower in 2018 (9% and 9% lower for QOF and non-QOF,  
15 respectively) and 2019 (21% and 21% lower for QOF and non-QOF, respectively) compared  
16 to 2015.  
17  
18  
19  
20  
21  
22

#### 23 Adjustment for total number of consultations 24

25 A sensitivity analysis was used to adjust for total number of consultations in year 1 or year 2  
26 from diagnosis (Tables A3-A6). Total number of consultations in each year were strongly  
27 linked to the rate of codes. For newly diagnosed QOF conditions, the associations with age,  
28 sex and ethnicity in years 1 and 2 remained significant after adjustment (Tables A3-A4).  
29 However, the association with deprivation was attenuated, although there remained an  
30 association with higher rates of codes with lower deprivation in year 2. For newly diagnosed  
31 non-QOF conditions, after adjustment for consultations, age and ethnicity remained  
32 significantly associated, but males had significantly higher rates of codes than females  
33 (Tables A5-A6). Associations with deprivation were attenuated, but there remained a small  
34 but significant association in year 2.  
35  
36  
37  
38  
39  
40  
41  
42  
43

44 **Figure 2: Associations of rate of codes in year one and year two following diagnosis with**  
45 **patient characteristics and calendar year, for conditions included in the Quality and**  
46 **Outcomes Framework (QOF)**  
47  
48  
49  
50

51 **Figure 3: Associations of rate of codes in year one and year two following diagnosis with**  
52 **patient characteristics and calendar year, for conditions not included in the Quality and**  
53 **Outcomes Framework (QOF)**  
54  
55  
56  
57  
58  
59  
60

## Discussion

With an increased use of methods incorporating information on disease sequence, we need to better understand the structure and frequency of occurrence of diagnostic codes within the primary care EHR. Our study demonstrates significant associations in the frequency of codes for newly diagnosed conditions according to patient socio-demographic factors, GP practice, disease inclusion in QOF, and calendar year.

### Patient socio-demographics

Patient characteristics including age, sex and ethnicity were strongly linked to code frequency, although associations were inconsistent across QOF and non-QOF conditions, and for QOF conditions, were not consistent across the first and second year from diagnosis. People of non-White ethnicity, for example, had lower code rates for QOF conditions in year 1, but higher in year 2, compared to people of White ethnicity. We found consistent patterns with deprivation, with lower code frequency in people living in more deprived areas. A sensitivity analysis adjusting for total number of consultations attenuated the association with deprivation, suggesting that the relationship of code frequency with deprivation was partially explained by total primary care contacts.

These findings likely point to differences in the mix of conditions between patient groups, healthcare seeking behaviours, or access to care. For example, people living in areas of socioeconomic deprivation may be less likely to attend for screening, preventive care and ongoing management of chronic diseases. Previous research also suggests that although rates of appointments are similar across deciles of socioeconomic deprivation,<sup>22</sup> the rate of missed appointments increases and consultation length decreases with increasing deprivation, which may impact on code frequency for these groups, rather than indicating differences in healthcare need.<sup>23,24</sup>

### GP practice

Substantial variation was found in the frequency of codes between GP practices, which persisted after accounting for differences in patient mix in terms of age, sex, deprivation, ethnicity, number of chronic conditions and in year of diagnosis. Although this may indicate unmeasured confounding in the characteristics of patients between practices, it likely represents policies and practices that influence coding which vary between organisations and clinicians.<sup>11</sup> For example, some GP practices may be more rigorous about coding data in



1  
2  
3 clinical consultations and in correspondence from specialist services. Previous research has  
4 suggested that clinicians are more similar to those in the same practice than they are to  
5 clinicians in different practices with respect to treatment and diagnostic decisions.<sup>25</sup> Variation  
6 between clinicians in coding practices is likely to be significant both within and between  
7 practices, but this information was not accessible for the study, and its analysis would  
8 introduce multiple hierarchical dependencies outside the scope of this work. Future work  
9 could consider individual clinician effects on coding practices in the her.

### 16 17 QOF and non-QOF conditions

18 Code frequency was significantly higher for conditions included in QOF compared to  
19 conditions not included. Previous research has highlighted changes to policies and procedures  
20 within GP practices to meet targets, including improved disease registries, which may lead to  
21 an increased likelihood of a code being entered for a given condition.<sup>14</sup> We found substantial  
22 variation between GP practices in the mean code frequency for QOF conditions, but  
23 interestingly, this was strongly correlated ( $r=0.88$ ) with code frequency for non-QOF  
24 conditions, suggesting that practice-level effects impact on coding across all conditions,  
25 rather than specifically those incentivised by QOF. However, it is not possible in our study to  
26 determine whether differences in code frequency between QOF and non-QOF conditions are  
27 explained by greater healthcare need and contacts for QOF conditions or are explained by  
28 higher likelihood of coding when a patient presents.

### 38 39 Calendar year

40 Accounting for calendar time in analyses of patient trajectories is a methodological concern,  
41 as the further back in time in the medical record, particularly before the advent of the EHR  
42 and QOF, the greater the chance that coding practices, and even disease categories, vary.<sup>26</sup>  
43 Although our study started relatively recently in 2015, and we cannot infer code frequency  
44 before this time, we found consistency in code frequency over a short time-span from 2015-  
45 2017. The decline in year 1 codes in 2019, and year 2 codes in 2018 and 2019 likely relates to  
46 the impact of the COVID-19 pandemic which impacted significantly on health services in  
47 England from March 2020.<sup>27</sup> Previous studies have shown reductions in patients presenting  
48 with particular conditions, and a reduction in appointment numbers in primary and secondary  
49 healthcare in England.<sup>28</sup> Analyses reliant on coding frequency should therefore consider  
50 using calendar year in addition to patient age in modelling patient trajectories, or limiting  
51 analyses to defined time period.

### Strengths and limitations

A strength of our study is the inclusion of a large number of patients from a representative sample of primary care in England which will make our findings generalisable to the national population.<sup>15</sup> We included only patients with newly incident diseases to minimise potential confounding from diseases diagnosed historically, some of which might no longer be active. We also only included patients with continuous follow-up over the study period and with at least one year of full practice registration. We also excluded patients who died less than one year from a new diagnosis, which may impact on disease frequency estimates for disease which have poor survival. We considered using annualised rates for those with less than a full year of follow-up, but this resulted in very high annualised counts for some individuals with short follow-up, and might introduce additional bias if patients were to seek out care in advance of re-registering at another GP practice.

Our study has focussed on structured healthcare data, whereas much of the consultation is recorded as unstructured 'free-text'.<sup>29</sup> Although unstructured primary care data contains much richer information on the details of a presentation that may not be fully reflected in the coded entries, this information is not currently available from CPRD, but research in future could examine the agreement between structured and unstructured primary care EHR data. We stratified conditions according to QOF status given our hypothesis that it may influence coding frequency. However, we also found variation within categories; for example, polymyalgia rheumatica and motor neurone disease, which are not included in QOF, had high number of yearly codes, whereas cardiovascular events such as Transient Ischaemic Attack, included in QOF, had low yearly codes. Given the general, comparative nature of this paper, and its aim to examine relationships over many conditions, a condition-specific analysis of coding frequency was out of scope.

### Implications

Our findings have implications for researchers using code sequences recorded in primary care structured data. The frequency of repeated diagnostic codes relate to patient and condition-specific factors, coding incentives and practice-level factors. Although we cannot determine if these findings represent disease burden and healthcare need, it is likely that biases in coding operate at various levels. Specific approaches to reduce the impact of bias will depend on the methodology, but our work does suggest general principles.

1  
2  
3 Firstly, to consider the potential for bias within the data source and whether stratification may  
4 reduce it, for example, by selecting a smaller number of healthcare organisations or a  
5 narrower time period. Secondly, to consider adjustment or inclusion of patient, condition, GP  
6 practice and calendar year variables within analytical models. However, such an approach is  
7 not always recommended, particularly if prediction is the aim, as inclusion of factors such as  
8 ethnicity in algorithms may reinforce existing bias.<sup>30</sup> In NLP, text style transfer is often used  
9 as a method to control for different styles of writing, which may have relevance to  
10 approaches to account for the different coding styles of clinicians.<sup>31</sup> However, these  
11 approaches are complicated within the EHR as people are likely to see multiple different  
12 clinicians over time, with a small set of codes recorded at each visit. Finally, it is vital that  
13 generated representations or predictions from modelling are evaluated in different patient  
14 subgroups.

## 25 **Conclusion**

26 Our study found significant variation in the frequency of diagnostic codes recorded in the  
27 primary care medical record after diagnosis, related to patient socio-demographics, coding  
28 incentives and GP practice and a significant reduction in the frequency of codes associated  
29 with the onset of the COVID-19 pandemic. Methods using sequences of recurrence of codes  
30 in the medical record should consider accounting for these factors to reduce the risk of bias.

## 36 **Funding**

37 This research is funded through a clinical PhD fellowship awarded to TB from the Wellcome  
38 Trust 4i programme at Imperial College London (grant number N/A). JC acknowledge  
39 support from the Wellcome Trust (grant number N/A). MB acknowledges support from  
40 EPSRC grant EP/N014529/1 supporting the EPSRC Centre for Mathematics of Precision  
41 Healthcare. TW, AM and PA acknowledge support from the National Institute for Health and  
42 Care Research (NIHR) under the Applied Research Collaboration (ARC) Northwest London  
43 (grant number N/A). The views expressed in this publication are those of the authors and not  
44 necessarily those of the NHS, the NIHR, the Wellcome Trust or the Department of Health  
45 and Social Care.

## 56 **Competing interests**

57 The authors have no competing interests to declare  
58  
59  
60

### Contributor statement

TB conceptualised the study, conducted the data management and formal analysis and wrote the first draft of the manuscript. All authors contributed to the study design, methodology, interpretation of findings and reviewing and editing the manuscript. TB is the guarantor and accepts full responsibility for the work and the conduct of the study, had access to the data, and controlled the decision to publish. The corresponding author attests that all listed authors meet authorship criteria and that no others meeting the criteria have been omitted.

### Data sharing

The data used in this study are not publicly available as access is subject to approval processes. More information is available from CPRD: <https://cprd.com/research-applications>

### Ethics approval

Data access to the Clinical Practice Research Datalink (CPRD) and ethical approval was granted by CPRD's Research Data Governance Process on 28<sup>th</sup> April 2022 (Protocol reference: 22\_001818).

### Acknowledgements

Data management was provided by the Big Data and Analytical Unit (BDAU) at the Institute of Global Health Innovation (IGHI).

### References

1. Li, Y. *et al.* BEHRT: Transformer for Electronic Health Records. *Sci Rep* **10**, 7155 (2020).
2. Solares, J. R. A. *et al.* Transfer Learning in Electronic Health Records through Clinical Concept Embedding. 1–14 (2021).
3. Altuncu, M. T., Mayer, E., Yaliraki, S. N. & Barahona, M. From free text to clusters of content in health records: an unsupervised graph partitioning approach. *Applied Network Science* **4**, 2 (2019).
4. Kraljevic, Z. *et al.* Multi-domain clinical natural language processing with MedCAT: The Medical Concept Annotation Toolkit. *Artif Intell Med* **117**, 102083 (2021).

- 1  
2  
3 5. Rasmy, L., Xiang, Y., Xie, Z., Tao, C. & Zhi, D. Med-BERT: pretrained contextualized  
4 embeddings on large-scale structured electronic health records for disease prediction. *npj*  
5 *Digit. Med.* **4**, 1–13 (2021).  
6  
7
- 8  
9  
10 6. Choi, E. *et al.* Multi-layer representation learning for medical concepts. *Proceedings of*  
11 *the ACM SIGKDD International Conference on Knowledge Discovery and Data Mining*  
12 **13-17-Aug**, 1495–1504 (2016).  
13  
14
- 15  
16  
17 7. Choi, E. *et al.* RETAIN: An Interpretable Predictive Model for Healthcare using Reverse  
18 Time Attention Mechanism. Preprint at <https://doi.org/10.48550/arXiv.1608.05745>  
19 (2017).  
20  
21
- 22  
23  
24 8. Cai, X. *et al.* Medical Concept Embedding with Time-Aware Attention. Preprint at  
25 <http://arxiv.org/abs/1806.02873> (2018).  
26  
27
- 28  
29  
30 9. Busija, L., Lim, K., Szoeké, C., Sanders, K. M. & McCabe, M. P. Do replicable profiles  
31 of multimorbidity exist? Systematic review and synthesis. *European Journal of*  
32 *Epidemiology* **34**, 1025–1053 (2019).  
33  
34
- 35  
36  
37 10. Bhattacharya, M., Jurkowitz, C. & Shatkay, H. Co-occurrence of medical conditions:  
38 Exposing patterns through probabilistic topic modeling of snomed codes. *Journal of*  
39 *biomedical informatics* **82**, 31–40 (2018).  
40  
41
- 42  
43  
44 11. Verheij, R. A., Curcin, V., Delaney, B. C. & McGilchrist, M. M. Possible Sources of Bias  
45 in Primary Care Electronic Health Record Data Use and Reuse. *J Med Internet Res* **20**,  
46 e185 (2018).  
47  
48
- 49  
50  
51 12. Bots, S. H., Groenwold, R. H. H. & Dekkers, O. M. Using electronic health record data  
52 for clinical research: a quick guide. *European Journal of Endocrinology* **186**, E1–E6  
53 (2022).  
54  
55  
56  
57  
58  
59  
60

- 1  
2  
3 13. Forbes, L. J., Marchand, C., Doran, T. & Peckham, S. The role of the Quality and  
4  
5 Outcomes Framework in the care of long-term conditions: a systematic review. *Br J Gen*  
6  
7 *Pract* **67**, e775 (2017).  
8  
9
- 10 14. Dzudie, A. *et al.* MMM17-Cameroon, analysis and opportunities-Sub-Saharan Africa.  
11  
12 *European heart journal supplements : journal of the European Society of Cardiology*  
13  
14 (2019) doi:10.1093/eurheartj/suz081.  
15  
16
- 17 15. Wolf, A. *et al.* Data resource profile: Clinical Practice Research Datalink (CPRD)  
18  
19 Aurum. *International Journal of Epidemiology* **48**, 1740–1740g (2019).  
20  
21
- 22 16. Head, A. *et al.* Inequalities in incident and prevalent multimorbidity in England,  
23  
24 2004&#x2013;19: a population-based, descriptive study. *The Lancet Healthy Longevity*  
25  
26 **2**, e489–e497 (2021).  
27  
28
- 29 17. Kuan, V. *et al.* A chronological map of 308 physical and mental health conditions from 4  
30  
31 million individuals in the English National Health Service. *The Lancet Digital Health* **1**,  
32  
33 e63–e77 (2019).  
34  
35
- 36 18. Ministry of Housing & Communities & Local Government. English indices of  
37  
38 deprivation 2019. [https://www.gov.uk/government/statistics/english-indices-of-](https://www.gov.uk/government/statistics/english-indices-of-deprivation-2019)  
39  
40 [deprivation-2019](https://www.gov.uk/government/statistics/english-indices-of-deprivation-2019).  
41  
42
- 43 19. Dean, C. B. Testing for Overdispersion in Poisson and Binomial Regression Models.  
44  
45 *Journal of the American Statistical Association* **87**, 451–457 (1992).  
46  
47
- 48 20. Dunn, P. K. & Smyth, G. K. Randomized Quantile Residuals. *Journal of Computational*  
49  
50 *and Graphical Statistics* **5**, 236–244 (1996).  
51  
52
- 53 21. Feng, C., Li, L. & Sadeghpour, A. A comparison of residual diagnosis tools for  
54  
55 diagnosing regression models for count data. *BMC Med Res Methodol* **20**, 175 (2020).  
56  
57
- 58 22. Fisher, R., Dunn, P., Asaria, M. & Thorlby, R. Comparing general practice in areas of  
59  
60 high and low socioeconomic deprivation in England. 30.

- 1  
2  
3 23. Ellis, D. A., McQueenie, R., McConnachie, A., Wilson, P. & Williamson, A. E.  
4  
5 Demographic and practice factors predicting repeated non-attendance in primary care: a  
6 national retrospective cohort analysis. *The Lancet Public Health* **2**, e551–e559 (2017).  
7  
8  
9  
10 24. Gopfert, A., Deeny, S. R., Fisher, R. & Stafford, M. Primary care consultation length by  
11 deprivation and multimorbidity in England: an observational study using electronic  
12 patient records. *Br J Gen Pract* **71**, e185–e192 (2021).  
13  
14  
15  
16  
17 25. Jong, J. de, Groenewegen, P. & Westert, G. Medical practice variation: does it cluster  
18 within general practitioners' practices? in *Morbidity, Performance and Quality in*  
19 *Primary Care* (CRC Press, 2006).  
20  
21  
22  
23  
24 26. Gluckman, P. D. Evolving a definition of disease. *Archives of Disease in Childhood* **92**,  
25 1053 (2007).  
26  
27  
28  
29 27. Majeed, A., Maile, E. J. & Bindman, A. B. The primary care response to COVID-19 in  
30 England's National Health Service. *J R Soc Med* **113**, 208–210 (2020).  
31  
32  
33 28. Clarke, J., Beaney, T., Majeed, A., Darzi, A. & Barahona, M. Identifying naturally  
34 occurring communities of primary care providers in the English National Health Service  
35 in London. *BMJ Open* **10**, (2020).  
36  
37  
38  
39  
40 29. Tayefi, M. *et al.* Challenges and opportunities beyond structured data in analysis of  
41 electronic health records. *WIREs Computational Statistics* **13**, e1549 (2021).  
42  
43  
44  
45 30. Obermeyer, Z., Powers, B., Vogeli, C. & Mullainathan, S. Dissecting racial bias in an  
46 algorithm used to manage the health of populations. *Science* **366**, 447–453 (2019).  
47  
48  
49 31. Jin, D., Jin, Z., Hu, Z., Vechtomova, O. & Mihalcea, R. Deep Learning for Text Style  
50 Transfer: A Survey. Preprint at <http://arxiv.org/abs/2011.00416> (2021).  
51  
52  
53  
54  
55  
56

57 Figure 1 legend:

58 Note: different ranges used in each axis  
59  
60

1  
2  
3  
4  
5 Figure 2 legend:

6 Note: Points represent estimates of the incidence rate ratio and bars represent 95% confidence  
7 intervals from negative binomial regression models. Corresponding values and coefficients  
8 for pre-existing QOF and non-QOF conditions are given in appendix Tables A3 and A4.  
9  
10  
11  
12  
13  
14

15 Figure 3 legend:

16 Note: Points represent estimates of the incidence rate ratio and bars represent 95% confidence  
17 intervals from negative binomial regression models. Corresponding values and coefficients  
18 for pre-existing QOF and non-QOF conditions are given in appendix Tables A5 and A6.  
19  
20  
21  
22  
23  
24  
25  
26  
27  
28  
29  
30  
31  
32  
33  
34  
35  
36  
37  
38  
39  
40  
41  
42  
43  
44  
45  
46  
47  
48  
49  
50  
51  
52  
53  
54  
55  
56  
57  
58  
59  
60



# Scatterplot of yearly codes for QOF against non-QOF conditions

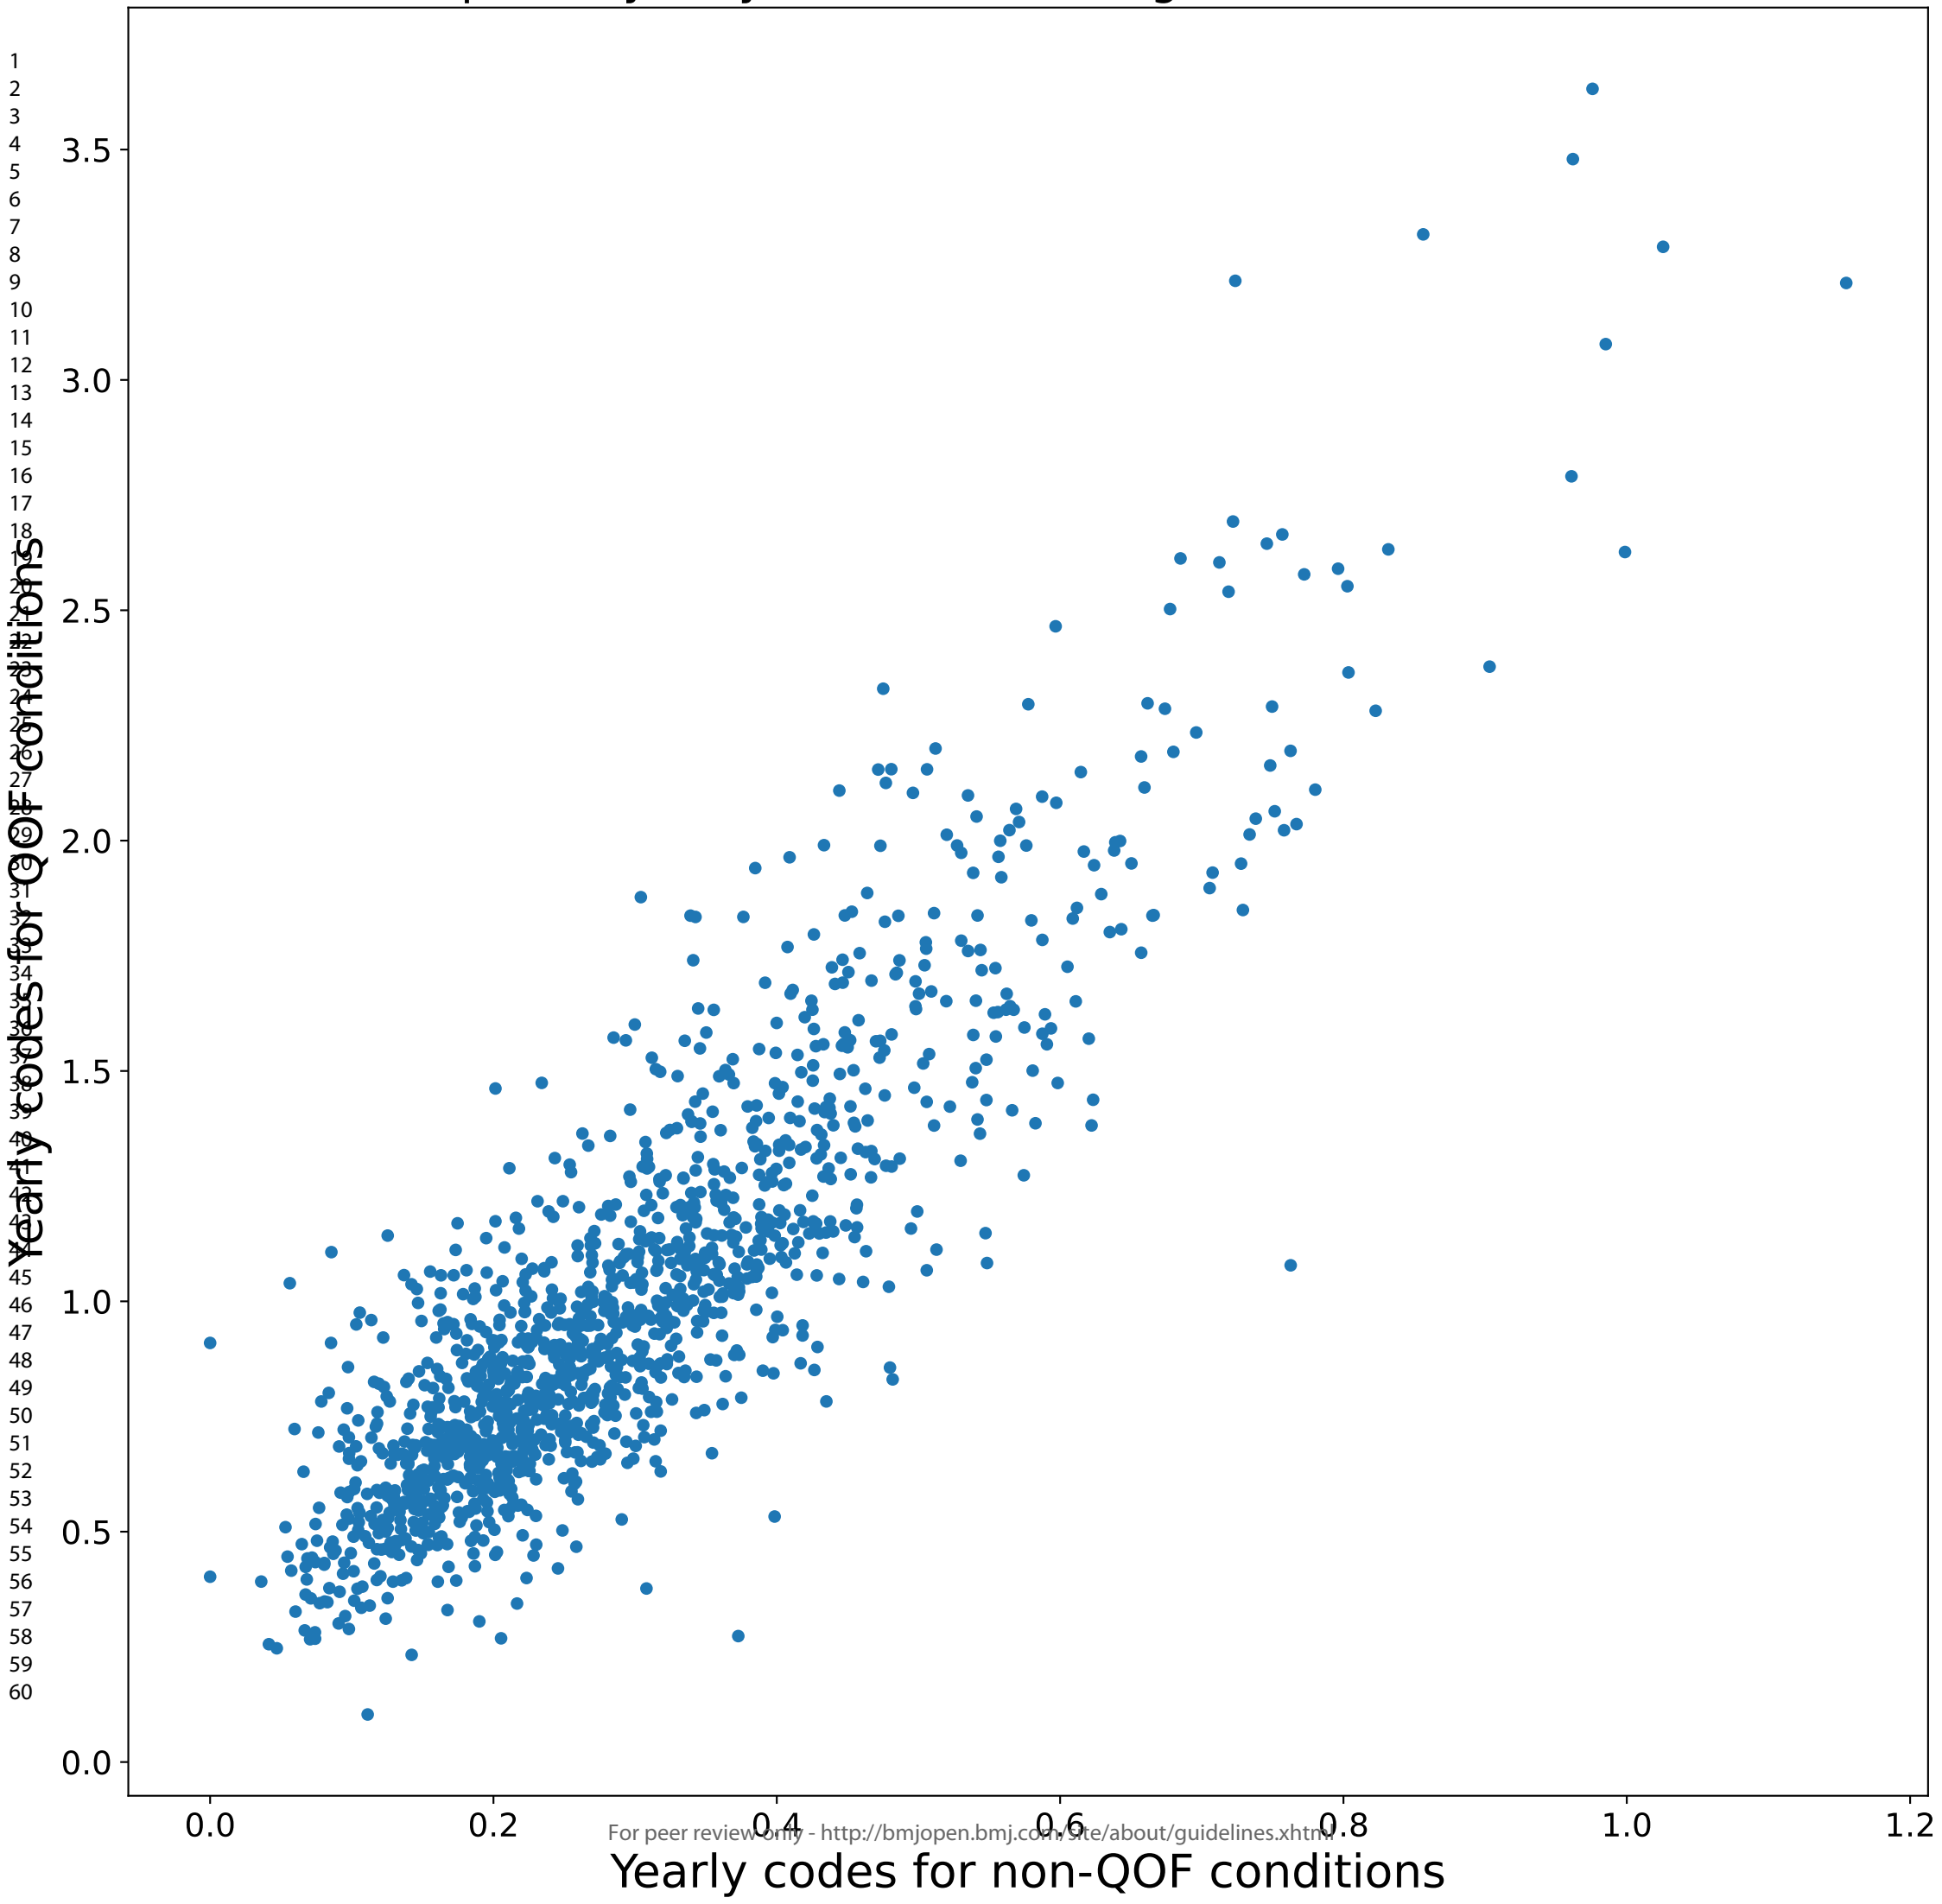

**Age category (years)**

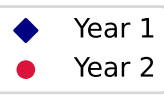

BMJ Open

1  
2  
3  
4  
5  
6  
7  
8  
9  
10  
11  
12  
13  
14  
15  
16  
17  
18  
19  
20  
21  
22  
23  
24  
25  
26  
27  
28  
29  
30  
31  
32  
33  
34  
35  
36  
37  
38  
39  
40  
41  
42  
43  
44  
45  
46  
47  
48  
49  
50  
51  
52  
53  
54  
55  
56  
57  
58  
59  
60

Under 40  
40-49  
50-59  
60-69 (reference)  
70-79  
80 or more

**Sex**

Female (reference)  
Male

**Ethnicity category**

White (reference)  
South Asian  
Black  
Other  
Mixed  
Missing

**IMD decile**

1 (most deprived)  
2  
3  
4  
5  
6  
7  
8  
9  
10 (least deprived)

**Calendar year of diagnosis**

2015 (reference)  
2016  
2017  
2018  
2019

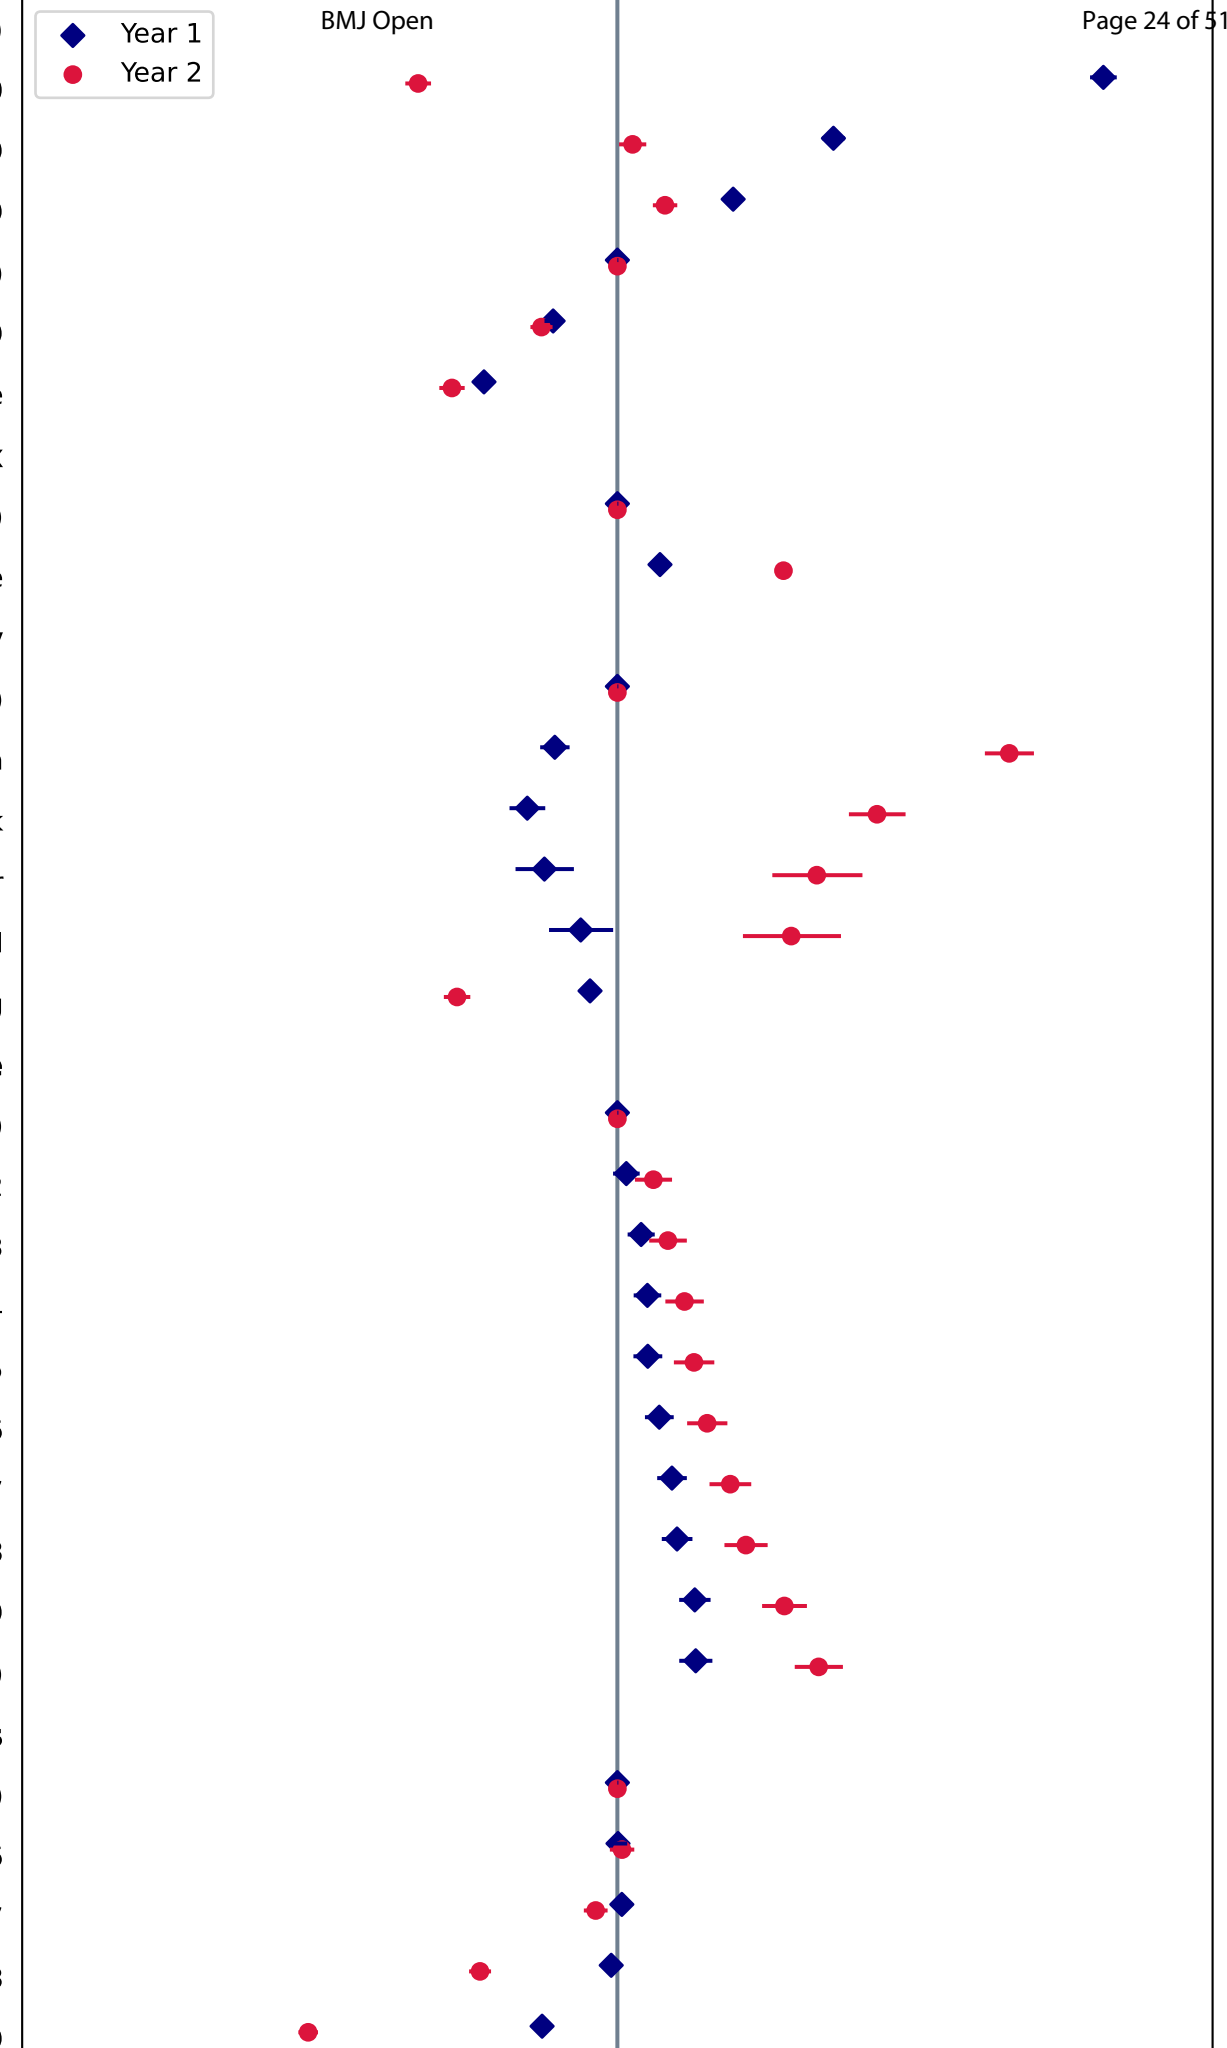

Incidence Rate Ratio

**Age category (years)**

1 Under 40

2 40-49

3

4 50-59

5

6 60-69 (reference)

7

8 70-79

9

10 80 or more

11 **Sex**

12

13 Female (reference)

14

15 Male

16

17 **Ethnicity category**

18

19 White (reference)

20

21 South Asian

22

23 Black

24

25 Other

26

27 Mixed

28

29 Missing

30

31 **IMD decile**

32

33 1 (most deprived)

34

35 2

36

37 3

38

39 4

40

41 5

42

43 6

44

45 7

46

47 8

48

49 9

50 10 (least deprived)

51 **Calendar year of diagnosis**

52

53 2015 (reference)

54

55 2016

56

57 2017

58

59 2018

60 2019

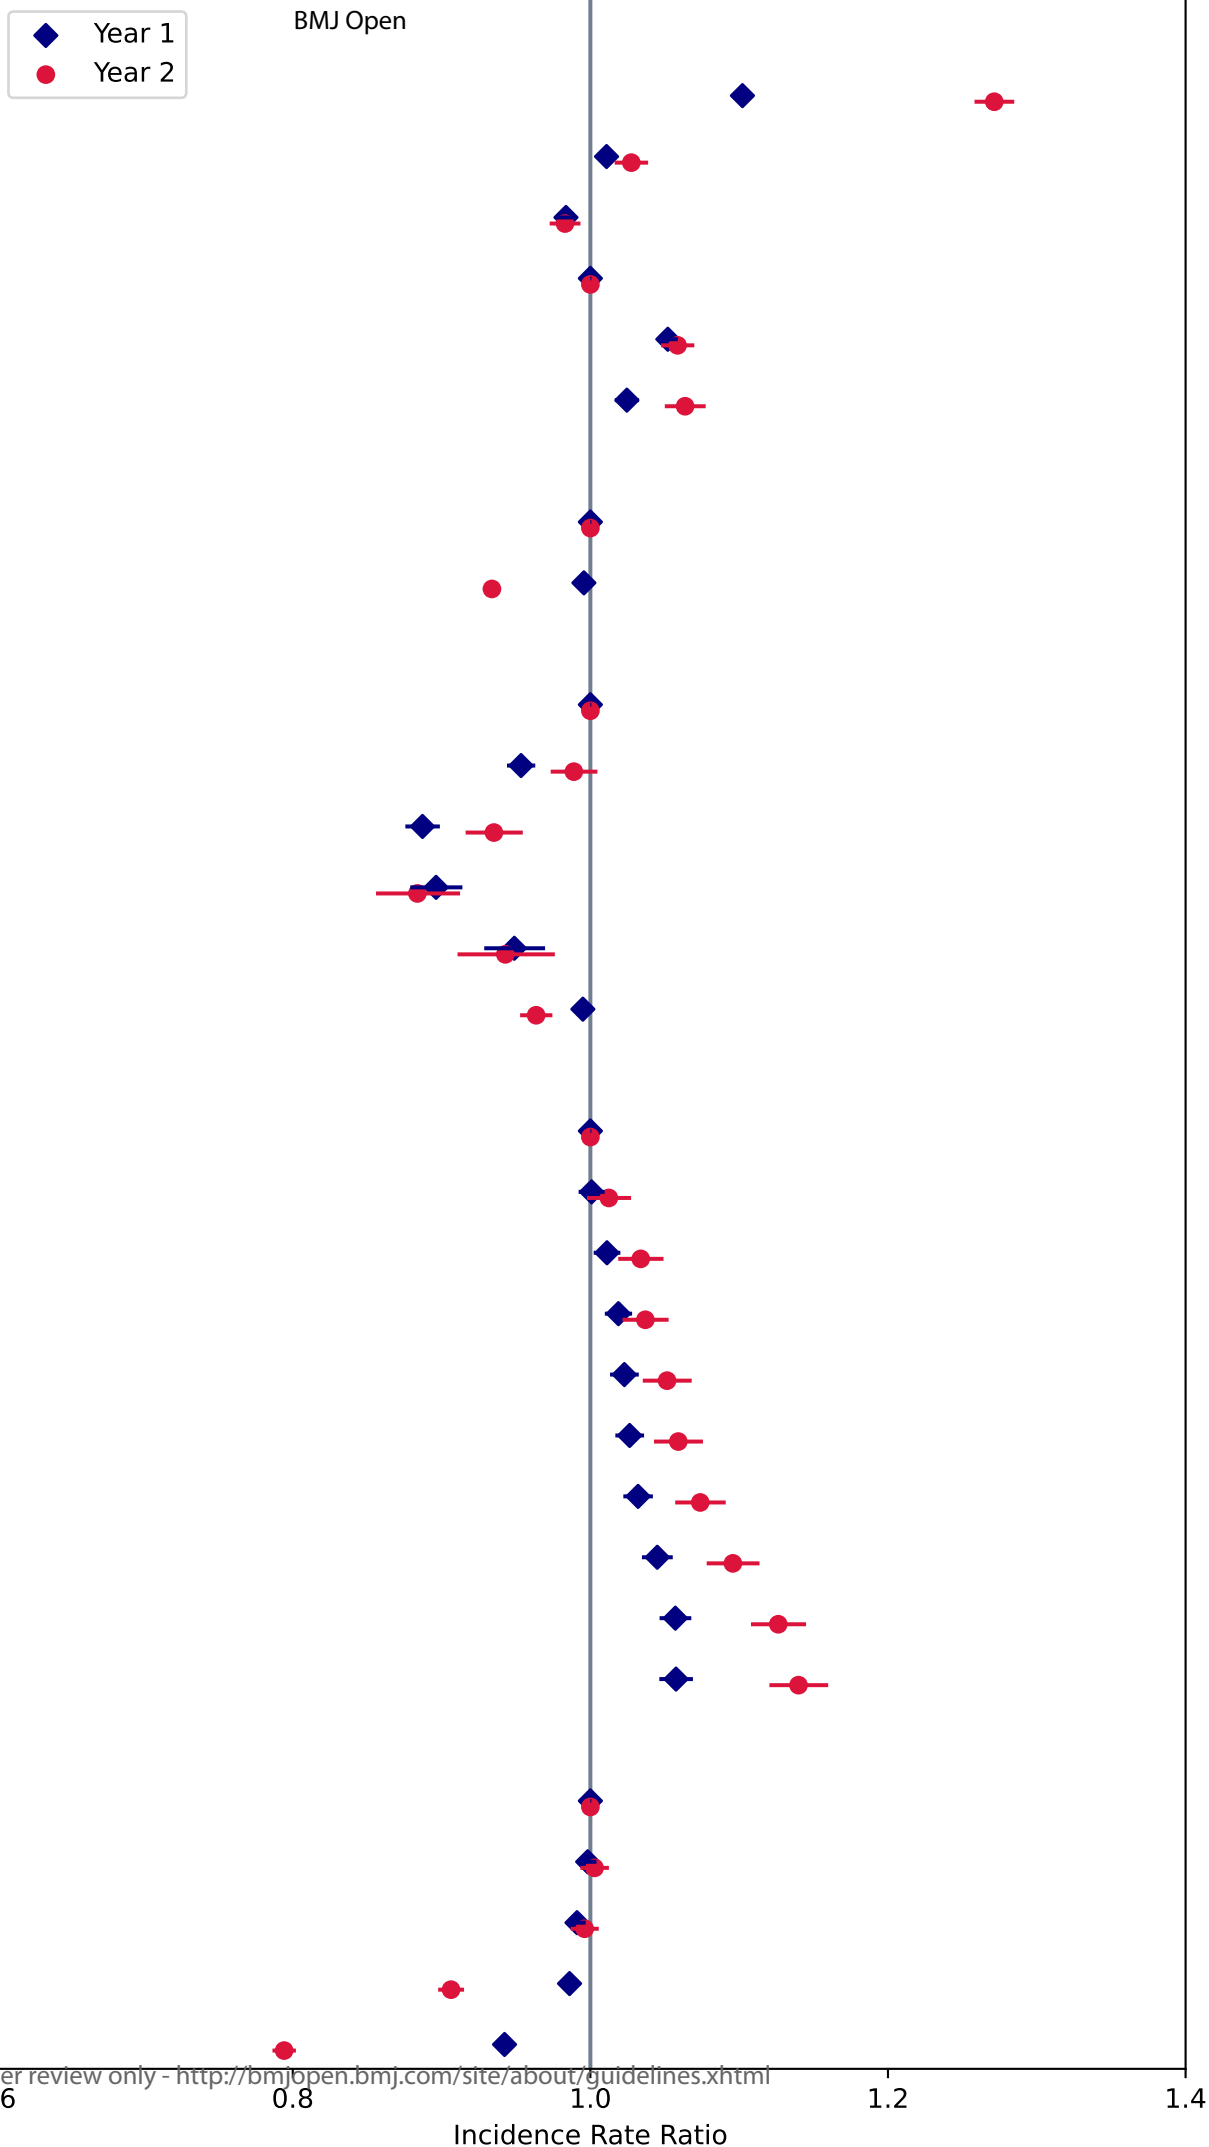

## Appendix

### Determinants of disease code frequency in the primary care electronic healthcare record: a retrospective cohort study

Beaney T<sup>1,2</sup> (0000-0001-9709-7264), Clarke J<sup>2</sup>, Salman <sup>D1,3</sup>, Woodcock T<sup>1</sup>, Majeed A<sup>1</sup>,  
Barahona M<sup>2</sup>, Aylin P<sup>1</sup>

1. Department of Primary Care and Public Health, Imperial College London, London, W6 8RP, United Kingdom
2. Centre for Mathematics of Precision Healthcare, Department of Mathematics, Imperial College London, London, SW7 2AZ, United Kingdom
3. MSk Lab, Department of Surgery and Cancer, Faculty of Medicine, Imperial College London, London, UK

Corresponding Author:

Dr Thomas Beaney

Department of Primary Care and Public Health, Imperial College London, London, W6 8RP,  
United Kingdom

Email: [thomas.beaney@imperial.ac.uk](mailto:thomas.beaney@imperial.ac.uk)

1  
2  
3 Patients were included with continuous registration dates between 1<sup>st</sup> January 2014 and 31<sup>st</sup>  
4 December 2020. The 1<sup>st</sup> January 2014 was chosen to allow for a full one year of registration  
5 at a GP practice prior to follow-up, to reduce the potential impact of bias from newly  
6 registered patients having pre-existing conditions coded for the first time at their new  
7 practice. The end date of 31<sup>st</sup> December 2020 was chosen to provide at least one full year of  
8 follow-up for conditions newly diagnosed in 2019. Patients were followed up until the  
9 earliest date of death, deregistration and latest date of data extraction from their practice, if  
10 after 31<sup>st</sup> December 2020. The earliest possible censoring date for a patient was 1<sup>st</sup> January  
11 2021 and the last date of follow-up for a patient was 21<sup>st</sup> March 2022.

### 20 Chronic conditions

21 Diseases were mapped using code lists developed for the CALIBER study, and adapted for  
22 use in multimorbidity in CPRD Aurum.<sup>1,2</sup> We reviewed the codes in these lists, and made  
23 amendments to the code lists for diabetes, to remove Type 1 and Type 2 codes from the  
24 other/unspecified code list. We added chronic primary pain to the set of included conditions  
25 and created a new code list. Previous studies of multimorbidity in primary care settings have  
26 found a high prevalence and burden of chronic pain.<sup>3,4</sup> However, in order to avoid double  
27 counting of pain related to another chronic condition included, we excluded secondary  
28 causes, and included only primary pain conditions.

### 37 Assignment to QOF

38 Diseases were classified as included or not included in QOF by two clinicians with  
39 experience working as GPs: TB and DS. The first QOF year in 2004/2005 included eleven  
40 diseases, with new conditions added in subsequent years.<sup>5</sup> Rheumatoid arthritis was added to  
41 QOF in 2013/2014, but there were no subsequent additions of any of the diseases included in  
42 this study.<sup>6</sup> However, hypothyroidism was included in QOF from its start until 2014/15 when  
43 it was removed.<sup>7</sup> The thyroid disease category from CALIBER included codes for both  
44 hypothyroidism and hyperthyroidism. We therefore excluded the thyroid disease category  
45 from comparisons of QOF to avoid any carry-over effect from prior inclusion in QOF, and  
46 dilution from non-hypothyroid conditions. The following QOF conditions from 2014/15 to  
47 2019/20 were included:

- 48 1. Coronary Heart Disease
- 49 2. Left Ventricular Dysfunction / Heart Failure (from 2006)

3. Stroke (and TIA from 2006)
4. Hypertension
5. Diabetes
6. COPD
7. Epilepsy
8. Cancer
9. Mental Health
10. Asthma
11. Dementia
12. Depression
13. CKD
14. Atrial fibrillation
15. Obesity
16. Learning disabilities
17. Palliative care
18. Smoking
19. Cardio-vascular disease (primary prevention)
20. Peripheral Arterial Disease (PAD)
21. Osteoporosis
22. Rheumatoid arthritis

For analyses of counts per calendar year, the total counts of disease codes were calculated for the first and second year from diagnosis. Counts were stratified according to whether a condition was included in QOF. A patient was included for a given calendar year if they had at least one QOF or non-QOF condition diagnosed in that year, as shown in Table A1.

**Appendix Table A1: example of the stratification of condition and calendar year for each newly diagnosed condition for three hypothetical patients**

| Patient | Age | Condition | Calendar year | Count in year one | Count in year two |
|---------|-----|-----------|---------------|-------------------|-------------------|
| 1       | 67  | QOF       | 2015          | 0                 | 0                 |
| 1       | 68  | QOF       | 2016          | 2                 | 0                 |
| 1       | 70  | QOF       | 2018          | 4                 | 2                 |
| 1       | 67  | Non-QOF   | 2015          | 1                 | 1                 |
| 2       | 28  | Non-QOF   | 2019          | 1                 | 2                 |
| 3       | 52  | QOF       | 2017          | 5                 | 4                 |
| 3       | 52  | Non-QOF   | 2017          | 2                 | 2                 |

### Statistical analyses

Mixed effects negative binomial models were constructed. We considered use of a zero-inflated model, but coefficients from the logit and negative binomial components of the model were similar, and so in the interests of interpretable findings, the more parsimonious negative binomial model was selected.

Equation for the mixed effects negative binomial regression model, including fixed effects for calendar year and GP practice and random effects for patient:

$$\log(y_{i,j}) = \beta_0 + \beta_1 age_{i,j} + \beta_2 gender_{i,j} + \beta_3 ethnicity_{i,j} + \beta_4 IMD_{i,j} \\ + \beta_5 year_{i,j} + \beta_6 GP_{i,j} + u_j$$

where  $i$  represents QOF or non-QOF conditions newly diagnosed in patient  $j$  and  $y_{i,j}$  is the count of codes in the given year.



**Appendix Table A2: distribution of yearly codes over the whole follow-up period for each condition, ordered by median**

| Disease                                          | 5 <sup>th</sup> centile | Median | 95 <sup>th</sup> centile | Mean | Standard deviation |
|--------------------------------------------------|-------------------------|--------|--------------------------|------|--------------------|
| Diabetes Mellitus_other or not specified         | 0.00                    | 2.99   | 6.88                     | 3.08 | 2.22               |
| Polymyalgia Rheumatica                           | 0.00                    | 1.05   | 6.32                     | 1.82 | 2.29               |
| Motor neurone disease                            | 0.00                    | 0.95   | 12.15                    | 2.86 | 5.41               |
| Dementia                                         | 0.00                    | 0.93   | 4.36                     | 1.39 | 1.80               |
| Type 2 Diabetes Mellitus                         | 0.00                    | 0.89   | 4.59                     | 1.41 | 1.73               |
| Type 1 Diabetes Mellitus                         | 0.00                    | 0.88   | 6.31                     | 1.71 | 2.41               |
| Depression                                       | 0.00                    | 0.83   | 4.54                     | 1.36 | 1.76               |
| COPD                                             | 0.00                    | 0.77   | 3.77                     | 1.17 | 1.43               |
| Heart failure                                    | 0.00                    | 0.73   | 5.48                     | 1.46 | 2.21               |
| Rheumatoid Arthritis                             | 0.00                    | 0.70   | 5.50                     | 1.43 | 2.23               |
| Primary Malignancy_Mesothelioma                  | 0.00                    | 0.67   | 9.16                     | 1.78 | 3.18               |
| Primary Malignancy_Pancreas                      | 0.00                    | 0.67   | 13.41                    | 2.63 | 5.12               |
| Primary Malignancy_Brain                         | 0.00                    | 0.66   | 10.60                    | 2.15 | 3.96               |
| Primary Malignancy_Oesophageal                   | 0.00                    | 0.64   | 10.86                    | 2.44 | 4.95               |
| Myasthenia gravis                                | 0.00                    | 0.62   | 5.61                     | 1.48 | 2.66               |
| Multiple sclerosis                               | 0.00                    | 0.59   | 5.63                     | 1.40 | 2.41               |
| Parkinson's disease                              | 0.00                    | 0.59   | 4.52                     | 1.20 | 1.77               |
| Vitamin B12 deficiency anaemia                   | 0.00                    | 0.56   | 4.60                     | 1.24 | 1.67               |
| Bipolar affective disorder and mania             | 0.00                    | 0.56   | 4.99                     | 1.30 | 2.15               |
| Plasma Cell Malignancy                           | 0.00                    | 0.54   | 10.32                    | 2.15 | 4.67               |
| Hypertension                                     | 0.00                    | 0.54   | 2.95                     | 0.88 | 1.12               |
| Atrial Fibrillation                              | 0.00                    | 0.51   | 3.47                     | 0.97 | 1.47               |
| Primary Malignancy_Prostate                      | 0.00                    | 0.51   | 6.11                     | 1.46 | 2.48               |
| Intellectual disability                          | 0.00                    | 0.49   | 5.19                     | 1.47 | 1.91               |
| Primary Malignancy_Lung                          | 0.00                    | 0.45   | 8.17                     | 1.73 | 3.55               |
| Primary Malignancy_Biliary Tract                 | 0.00                    | 0.45   | 8.96                     | 1.89 | 4.73               |
| Giant Cell arteritis                             | 0.00                    | 0.44   | 5.73                     | 1.36 | 2.47               |
| Crohn's disease                                  | 0.00                    | 0.42   | 5.41                     | 1.24 | 2.32               |
| Primary Malignancy_Breast                        | 0.00                    | 0.39   | 5.25                     | 1.21 | 2.47               |
| Hodgkin Lymphoma                                 | 0.00                    | 0.38   | 5.41                     | 1.24 | 2.55               |
| Ulcerative colitis                               | 0.00                    | 0.38   | 4.27                     | 1.00 | 1.87               |
| Primary Malignancy_Oropharyngeal                 | 0.00                    | 0.37   | 6.84                     | 1.44 | 2.95               |
| Non-Hodgkin Lymphoma                             | 0.00                    | 0.37   | 5.52                     | 1.22 | 2.53               |
| Leukaemia                                        | 0.00                    | 0.37   | 5.19                     | 1.17 | 2.58               |
| Secondary Malignancy_Brain                       | 0.00                    | 0.37   | 7.68                     | 1.45 | 2.74               |
| Stroke_not otherwise specified                   | 0.00                    | 0.34   | 2.11                     | 0.59 | 0.89               |
| Idiopathic Intracranial Hypertension             | 0.00                    | 0.34   | 3.81                     | 0.92 | 1.76               |
| Thyroid Disease                                  | 0.00                    | 0.33   | 2.56                     | 0.68 | 1.16               |
| Asthma                                           | 0.00                    | 0.32   | 2.33                     | 0.63 | 0.99               |
| Primary Malignancy_Stomach                       | 0.00                    | 0.32   | 6.93                     | 1.45 | 3.30               |
| Chronic primary pain                             | 0.00                    | 0.32   | 3.23                     | 0.79 | 1.34               |
| Coronary Heart Disease (not otherwise specified) | 0.00                    | 0.31   | 2.02                     | 0.56 | 0.85               |
| Epilepsy                                         | 0.00                    | 0.31   | 3.66                     | 0.92 | 1.95               |

1  
2  
3  
4  
5  
6  
7  
8  
9  
10  
11  
12  
13  
14  
15  
16  
17  
18  
19  
20  
21  
22  
23  
24  
25  
26  
27  
28  
29  
30  
31  
32  
33  
34  
35  
36  
37  
38  
39  
40  
41  
42  
43  
44  
45  
46  
47  
48  
49  
50  
51  
52  
53  
54  
55  
56  
57  
58  
59  
60

|                                   |      |      |      |      |      |
|-----------------------------------|------|------|------|------|------|
| Psoriatic Arthritis               | 0.00 | 0.30 | 3.68 | 0.87 | 1.63 |
| Chronic Fatigue Syndrome          | 0.00 | 0.29 | 3.22 | 0.76 | 1.31 |
| Primary Malignancy_Bowel          | 0.00 | 0.29 | 5.25 | 1.15 | 2.88 |
| Anxiety disorders                 | 0.00 | 0.29 | 2.99 | 0.73 | 1.29 |
| Primary Malignancy_Thyroid        | 0.00 | 0.28 | 4.05 | 0.88 | 1.76 |
| Personality disorders             | 0.00 | 0.28 | 4.35 | 0.99 | 2.05 |
| Schizophrenia                     | 0.00 | 0.27 | 3.36 | 0.78 | 1.52 |
| Primary Malignancy_Cervix         | 0.00 | 0.27 | 5.26 | 1.17 | 2.77 |
| Autoimmune liver disease          | 0.00 | 0.26 | 3.63 | 0.85 | 1.82 |
| Myelodysplastic Syndrome          | 0.00 | 0.26 | 4.88 | 1.15 | 2.95 |
| Bronchiectasis                    | 0.00 | 0.24 | 3.03 | 0.70 | 1.31 |
| Hyperkinetic disorders            | 0.00 | 0.24 | 3.11 | 0.72 | 1.34 |
| Primary Malignancy_Ovary          | 0.00 | 0.24 | 6.15 | 1.24 | 2.87 |
| Primary Malignancy_Liver          | 0.00 | 0.23 | 3.64 | 0.95 | 2.99 |
| Coeliac disease                   | 0.00 | 0.23 | 2.13 | 0.52 | 0.85 |
| Lupus Erythematosus               | 0.00 | 0.22 | 3.52 | 0.83 | 1.87 |
| Myocardial Infarction             | 0.00 | 0.21 | 2.44 | 0.58 | 1.04 |
| Primary Malignancy_Bone           | 0.00 | 0.21 | 4.03 | 0.97 | 3.29 |
| Secondary Malignancy_other        | 0.00 | 0.21 | 5.92 | 1.18 | 2.65 |
| Peripheral Vascular Disease       | 0.00 | 0.20 | 2.73 | 0.75 | 2.53 |
| Ankylosing spondylitis            | 0.00 | 0.20 | 3.00 | 0.69 | 1.47 |
| Primary Malignancy_Bladder        | 0.00 | 0.20 | 4.38 | 0.90 | 2.05 |
| Primary Malignancy_Testis         | 0.00 | 0.20 | 3.58 | 0.81 | 1.50 |
| Sarcoidosis                       | 0.00 | 0.19 | 3.36 | 0.72 | 1.53 |
| Abdominal Hernia                  | 0.00 | 0.19 | 1.55 | 0.40 | 0.68 |
| Secondary Malignancy_Peritoneum   | 0.00 | 0.19 | 4.21 | 1.30 | 3.31 |
| Scleroderma                       | 0.00 | 0.19 | 3.00 | 0.71 | 1.88 |
| Primary Malignancy_Melanoma       | 0.00 | 0.18 | 3.06 | 0.67 | 1.71 |
| Gout                              | 0.00 | 0.17 | 1.74 | 0.43 | 0.73 |
| Barrett's oesophagus              | 0.00 | 0.16 | 1.40 | 0.35 | 0.57 |
| Glomerulonephritis                | 0.00 | 0.16 | 3.26 | 0.74 | 1.69 |
| Osteoporosis                      | 0.00 | 0.15 | 1.52 | 0.38 | 0.65 |
| Primary Malignancy_Uterus         | 0.00 | 0.15 | 3.90 | 0.81 | 2.16 |
| Cirrhosis                         | 0.00 | 0.15 | 2.88 | 0.63 | 1.40 |
| Diabetic Eye Disease              | 0.00 | 0.15 | 1.61 | 0.40 | 0.68 |
| Intracerebral haemorrhage         | 0.00 | 0.15 | 2.58 | 0.56 | 1.10 |
| Primary Malignancy_Kidney         | 0.00 | 0.14 | 2.93 | 0.66 | 1.67 |
| Dilated cardiomyopathy            | 0.00 | 0.14 | 1.99 | 0.46 | 0.93 |
| Eating Disorders                  | 0.00 | 0.14 | 4.03 | 0.84 | 2.38 |
| Abdominal Aortic Aneurysm         | 0.00 | 0.00 | 1.35 | 0.26 | 0.58 |
| Acne                              | 0.00 | 0.00 | 1.26 | 0.30 | 0.50 |
| Alcohol Misuse                    | 0.00 | 0.00 | 0.94 | 0.20 | 0.66 |
| Alcoholic liver disease           | 0.00 | 0.00 | 1.90 | 0.42 | 1.09 |
| Allergic and chronic rhinitis     | 0.00 | 0.00 | 0.56 | 0.10 | 0.27 |
| Alopecia areata                   | 0.00 | 0.00 | 0.87 | 0.17 | 0.45 |
| Anaemia_other                     | 0.00 | 0.00 | 1.49 | 0.33 | 0.78 |
| Angiodysplasia of colon           | 0.00 | 0.00 | 0.87 | 0.17 | 0.49 |
| Anterior and Intermediate Uveitis | 0.00 | 0.00 | 1.18 | 0.25 | 0.66 |
| Aplastic anaemias                 | 0.00 | 0.00 | 2.19 | 0.47 | 1.42 |

|    |                                         |      |      |      |      |      |
|----|-----------------------------------------|------|------|------|------|------|
| 1  |                                         |      |      |      |      |      |
| 2  |                                         |      |      |      |      |      |
| 3  | Asbestosis                              | 0.00 | 0.00 | 0.96 | 0.20 | 0.65 |
| 4  | Atrioventricular blocks                 | 0.00 | 0.00 | 0.64 | 0.11 | 0.33 |
| 5  | Autism and Asperger's syndrome          | 0.00 | 0.00 | 1.10 | 0.25 | 0.58 |
| 6  | Autonomic Neuropathy                    | 0.00 | 0.00 | 2.46 | 0.47 | 1.34 |
| 7  | Benign Prostatic Hyperplasia            | 0.00 | 0.00 | 1.08 | 0.25 | 0.50 |
| 8  | Benign essential tremor                 | 0.00 | 0.00 | 1.11 | 0.22 | 0.53 |
| 9  | Cardiomyopathy_other                    | 0.00 | 0.00 | 1.94 | 0.41 | 0.90 |
| 10 | Cataract                                | 0.00 | 0.00 | 1.16 | 0.27 | 0.50 |
| 11 | Cerebral Palsy                          | 0.00 | 0.00 | 0.73 | 0.16 | 0.48 |
| 12 | Chronic Cystitis                        | 0.00 | 0.00 | 1.88 | 0.37 | 1.03 |
| 13 | Chronic Kidney Disease                  | 0.00 | 0.00 | 1.16 | 0.26 | 0.65 |
| 14 | Chronic sinusitis                       | 0.00 | 0.00 | 0.72 | 0.13 | 0.39 |
| 15 | Chronic viral hepatitis                 | 0.00 | 0.00 | 1.89 | 0.40 | 0.90 |
| 16 | Collapsed vertebra                      | 0.00 | 0.00 | 1.64 | 0.34 | 0.77 |
| 17 | Congenital Septal Defect                | 0.00 | 0.00 | 1.21 | 0.24 | 0.62 |
| 18 | Cystic Fibrosis                         | 0.00 | 0.00 | 2.21 | 0.31 | 1.00 |
| 19 | Dermatitis                              | 0.00 | 0.00 | 0.76 | 0.15 | 0.43 |
| 20 | Diabetic Neuropathy                     | 0.00 | 0.00 | 1.62 | 0.38 | 1.44 |
| 21 | Diaphragmatic hernia                    | 0.00 | 0.00 | 0.81 | 0.17 | 0.38 |
| 22 | Diverticular Disease                    | 0.00 | 0.00 | 0.96 | 0.20 | 0.51 |
| 23 | Down's syndrome                         | 0.00 | 0.00 | 0.48 | 0.10 | 0.19 |
| 24 | Dysmenorrhoea                           | 0.00 | 0.00 | 0.78 | 0.15 | 0.38 |
| 25 | Endometrial hyperplasia and hypertrophy | 0.00 | 0.00 | 0.90 | 0.17 | 0.57 |
| 26 | Endometriosis                           | 0.00 | 0.00 | 2.08 | 0.44 | 1.06 |
| 27 | Enteropathic arthropathy                | 0.00 | 0.00 | 1.28 | 0.38 | 0.99 |
| 28 | Enthesopathy and synovial disorder      | 0.00 | 0.00 | 0.86 | 0.18 | 0.43 |
| 29 | Fatty Liver                             | 0.00 | 0.00 | 0.75 | 0.14 | 0.34 |
| 30 | Fibromatosis                            | 0.00 | 0.00 | 0.85 | 0.17 | 0.39 |
| 31 | Folate deficiency anaemia               | 0.00 | 0.00 | 0.52 | 0.09 | 0.25 |
| 32 | Gastritis and duodenitis                | 0.00 | 0.00 | 0.73 | 0.14 | 0.39 |
| 33 | Gastro-oesophageal reflux disease       | 0.00 | 0.00 | 0.88 | 0.18 | 0.43 |
| 34 | Glaucoma                                | 0.00 | 0.00 | 1.46 | 0.31 | 0.62 |
| 35 | HIV                                     | 0.00 | 0.00 | 2.07 | 0.41 | 0.92 |
| 36 | Hearing loss                            | 0.00 | 0.00 | 0.77 | 0.16 | 0.34 |
| 37 | Hepatic failure                         | 0.00 | 0.00 | 2.22 | 0.46 | 1.07 |
| 38 | Hidradenitis suppurativa                | 0.00 | 0.00 | 1.92 | 0.43 | 1.11 |
| 39 | Hyperparathyroidism                     | 0.00 | 0.00 | 1.84 | 0.41 | 0.84 |
| 40 | Hypersplenism                           | 0.00 | 0.00 | 0.99 | 0.21 | 0.58 |
| 41 | Hypertrophic Cardiomyopathy             | 0.00 | 0.00 | 2.23 | 0.49 | 1.00 |
| 42 | Hypertrophic Nasal Turbinates           | 0.00 | 0.00 | 0.28 | 0.04 | 0.16 |
| 43 | Hyposplenism                            | 0.00 | 0.00 | 1.50 | 0.34 | 0.71 |
| 44 | Immunodeficiencies                      | 0.00 | 0.00 | 1.62 | 0.36 | 1.11 |
| 45 | Intervertebral disc disorders           | 0.00 | 0.00 | 1.75 | 0.36 | 0.91 |
| 46 | Irritable bowel syndrome                | 0.00 | 0.00 | 0.66 | 0.13 | 0.32 |
| 47 | Ischaemic stroke                        | 0.00 | 0.00 | 2.03 | 0.46 | 0.99 |
| 48 | Left bundle branch block                | 0.00 | 0.00 | 0.77 | 0.15 | 0.39 |
| 49 | Macular degeneration                    | 0.00 | 0.00 | 1.16 | 0.25 | 0.71 |
| 50 | Meniere's Disease                       | 0.00 | 0.00 | 1.58 | 0.33 | 0.77 |
| 51 | Migraine                                | 0.00 | 0.00 | 1.21 | 0.25 | 0.61 |

1  
2  
3  
4  
5  
6  
7  
8  
9  
10  
11  
12  
13  
14  
15  
16  
17  
18  
19  
20  
21  
22  
23  
24  
25  
26  
27  
28  
29  
30  
31  
32  
33  
34  
35  
36  
37  
38  
39  
40  
41  
42  
43  
44  
45  
46  
47  
48  
49  
50  
51  
52  
53  
54  
55  
56  
57  
58  
59  
60

|                                        |      |      |      |      |      |
|----------------------------------------|------|------|------|------|------|
| Multiple valve disorder                | 0.00 | 0.00 | 0.49 | 0.09 | 0.33 |
| Neuropathic Bladder                    | 0.00 | 0.00 | 0.74 | 0.15 | 0.36 |
| Nonrheumatic aortic valve disorders    | 0.00 | 0.00 | 1.42 | 0.31 | 0.68 |
| Nonrheumatic mitral valve disorders    | 0.00 | 0.00 | 0.84 | 0.16 | 0.52 |
| Obesity                                | 0.00 | 0.00 | 0.71 | 0.15 | 0.44 |
| Obsessive-compulsive disorder          | 0.00 | 0.00 | 2.55 | 0.56 | 1.21 |
| Obstructive and reflux uropathy        | 0.00 | 0.00 | 1.10 | 0.23 | 0.63 |
| Oesophageal varices                    | 0.00 | 0.00 | 1.62 | 0.38 | 0.74 |
| Osteoarthritis (excl spine)            | 0.00 | 0.00 | 1.53 | 0.34 | 0.70 |
| Other haemolytic anaemias              | 0.00 | 0.00 | 3.09 | 0.62 | 1.64 |
| Pancreatitis                           | 0.00 | 0.00 | 2.00 | 0.44 | 1.09 |
| Pericardial Effusion                   | 0.00 | 0.00 | 1.12 | 0.21 | 0.56 |
| Peripheral Neuropathy                  | 0.00 | 0.00 | 1.22 | 0.26 | 0.81 |
| Pleural effusion                       | 0.00 | 0.00 | 1.55 | 0.32 | 0.90 |
| Pleural plaque                         | 0.00 | 0.00 | 0.74 | 0.14 | 0.48 |
| Polycystic ovarian syndrome            | 0.00 | 0.00 | 0.86 | 0.20 | 0.34 |
| Polycythaemia vera                     | 0.00 | 0.00 | 2.49 | 0.54 | 1.30 |
| Portal hypertension                    | 0.00 | 0.00 | 0.91 | 0.18 | 0.46 |
| Posterior Uveitis                      | 0.00 | 0.00 | 1.46 | 0.33 | 1.02 |
| Primary Malignancy_Multiple Sites      | 0.00 | 0.00 | 0.00 | 0.00 | 0.00 |
| Primary Malignancy_Skin                | 0.00 | 0.00 | 1.30 | 0.31 | 0.78 |
| Primary Malignancy_other               | 0.00 | 0.00 | 4.42 | 0.90 | 2.44 |
| Primary Thrombocytopaenia              | 0.00 | 0.00 | 2.41 | 0.59 | 1.96 |
| Primary pulmonary hypertension         | 0.00 | 0.00 | 1.62 | 0.32 | 1.00 |
| Psoriasis                              | 0.00 | 0.00 | 1.44 | 0.32 | 0.75 |
| Pulmonary Fibrosis                     | 0.00 | 0.00 | 2.38 | 0.53 | 1.34 |
| Raynaud's syndrome                     | 0.00 | 0.00 | 0.85 | 0.16 | 0.45 |
| Retinal vascular occlusions            | 0.00 | 0.00 | 1.93 | 0.42 | 0.93 |
| Rheumatic Valve Disorder               | 0.00 | 0.00 | 0.70 | 0.13 | 0.41 |
| Right bundle branch block combinations | 0.00 | 0.00 | 0.47 | 0.08 | 0.25 |
| Rosacea                                | 0.00 | 0.00 | 0.93 | 0.20 | 0.41 |
| Scleritis and episcleritis             | 0.00 | 0.00 | 0.70 | 0.13 | 0.49 |
| Seborrheic dermatitis                  | 0.00 | 0.00 | 0.61 | 0.11 | 0.31 |
| Secondary Malignancy_Adrenal Gland     | 0.00 | 0.00 | 1.68 | 0.42 | 1.01 |
| Secondary Malignancy_Bone              | 0.00 | 0.00 | 4.78 | 0.93 | 2.34 |
| Secondary Malignancy_Bowel             | 0.00 | 0.00 | 6.36 | 1.41 | 2.42 |
| Secondary Malignancy_Liver             | 0.00 | 0.00 | 4.82 | 0.91 | 2.26 |
| Secondary Malignancy_Lung              | 0.00 | 0.00 | 6.04 | 1.10 | 2.27 |
| Secondary Malignancy_Lymph Nodes       | 0.00 | 0.00 | 2.40 | 0.40 | 1.31 |
| Secondary Malignancy_Pleura            | 0.00 | 0.00 | 5.69 | 0.94 | 2.50 |
| Secondary Thrombocytopaenia            | 0.00 | 0.00 | 0.89 | 0.19 | 0.48 |
| Secondary polycythaemia                | 0.00 | 0.00 | 1.64 | 0.32 | 0.78 |
| Secondary pulmonary hypertension       | 0.00 | 0.00 | 1.29 | 0.27 | 0.83 |
| Sick sinus syndrome                    | 0.00 | 0.00 | 0.79 | 0.14 | 0.40 |
| Sickle Cell Disease                    | 0.00 | 0.00 | 0.98 | 0.29 | 1.07 |
| Sjogren's Syndrome                     | 0.00 | 0.00 | 1.48 | 0.31 | 0.68 |
| Sleep apnoea                           | 0.00 | 0.00 | 0.92 | 0.19 | 0.43 |
| Spina bifida                           | 0.00 | 0.00 | 0.48 | 0.11 | 0.44 |
| Spinal stenosis                        | 0.00 | 0.00 | 2.34 | 0.50 | 1.06 |

1  
2  
3  
4  
5  
6  
7  
8  
9  
10  
11  
12  
13  
14  
15  
16  
17  
18  
19  
20  
21  
22  
23  
24  
25  
26  
27  
28  
29  
30  
31  
32  
33  
34  
35  
36  
37  
38  
39  
40  
41  
42  
43  
44  
45  
46  
47  
48  
49  
50  
51  
52  
53  
54  
55  
56  
57  
58  
59  
60

|                                         |      |      |      |      |      |
|-----------------------------------------|------|------|------|------|------|
| Spondylolisthesis                       | 0.00 | 0.00 | 1.22 | 0.23 | 0.63 |
| Spondylosis                             | 0.00 | 0.00 | 1.01 | 0.21 | 0.57 |
| Stable Angina                           | 0.00 | 0.00 | 1.62 | 0.37 | 0.78 |
| Subarachnoid haemorrhage                | 0.00 | 0.00 | 2.41 | 0.51 | 1.05 |
| Substance Misuse                        | 0.00 | 0.00 | 1.42 | 0.32 | 1.34 |
| Supraventricular tachycardia            | 0.00 | 0.00 | 1.55 | 0.35 | 0.78 |
| Thalassaemia                            | 0.00 | 0.00 | 0.31 | 0.05 | 0.19 |
| Thrombophilia                           | 0.00 | 0.00 | 0.75 | 0.15 | 0.53 |
| Tinnitus                                | 0.00 | 0.00 | 0.85 | 0.17 | 0.43 |
| Transient ischaemic attack              | 0.00 | 0.00 | 1.56 | 0.35 | 0.70 |
| Trigeminal neuralgia                    | 0.00 | 0.00 | 2.16 | 0.47 | 1.05 |
| Tubulo-interstitial nephritis           | 0.00 | 0.00 | 2.70 | 0.50 | 1.23 |
| Unstable Angina                         | 0.00 | 0.00 | 1.17 | 0.23 | 0.58 |
| Urinary Incontinence                    | 0.00 | 0.00 | 0.87 | 0.18 | 0.38 |
| Venous thromboembolic disease (Excl PE) | 0.00 | 0.00 | 1.85 | 0.41 | 1.05 |
| Ventricular tachycardia                 | 0.00 | 0.00 | 1.64 | 0.32 | 0.75 |
| Visual impairment and blindness         | 0.00 | 0.00 | 0.73 | 0.13 | 0.31 |
| Vitiligo                                | 0.00 | 0.00 | 0.73 | 0.14 | 0.32 |

**Appendix Figure A1: Boxplots of observed and expected mean yearly codes at a GP practice level for QOF conditions in year 1 (A) and year 2 (B) and non-QOF conditions in year 1 (C) and year 2 (D) following diagnosis**

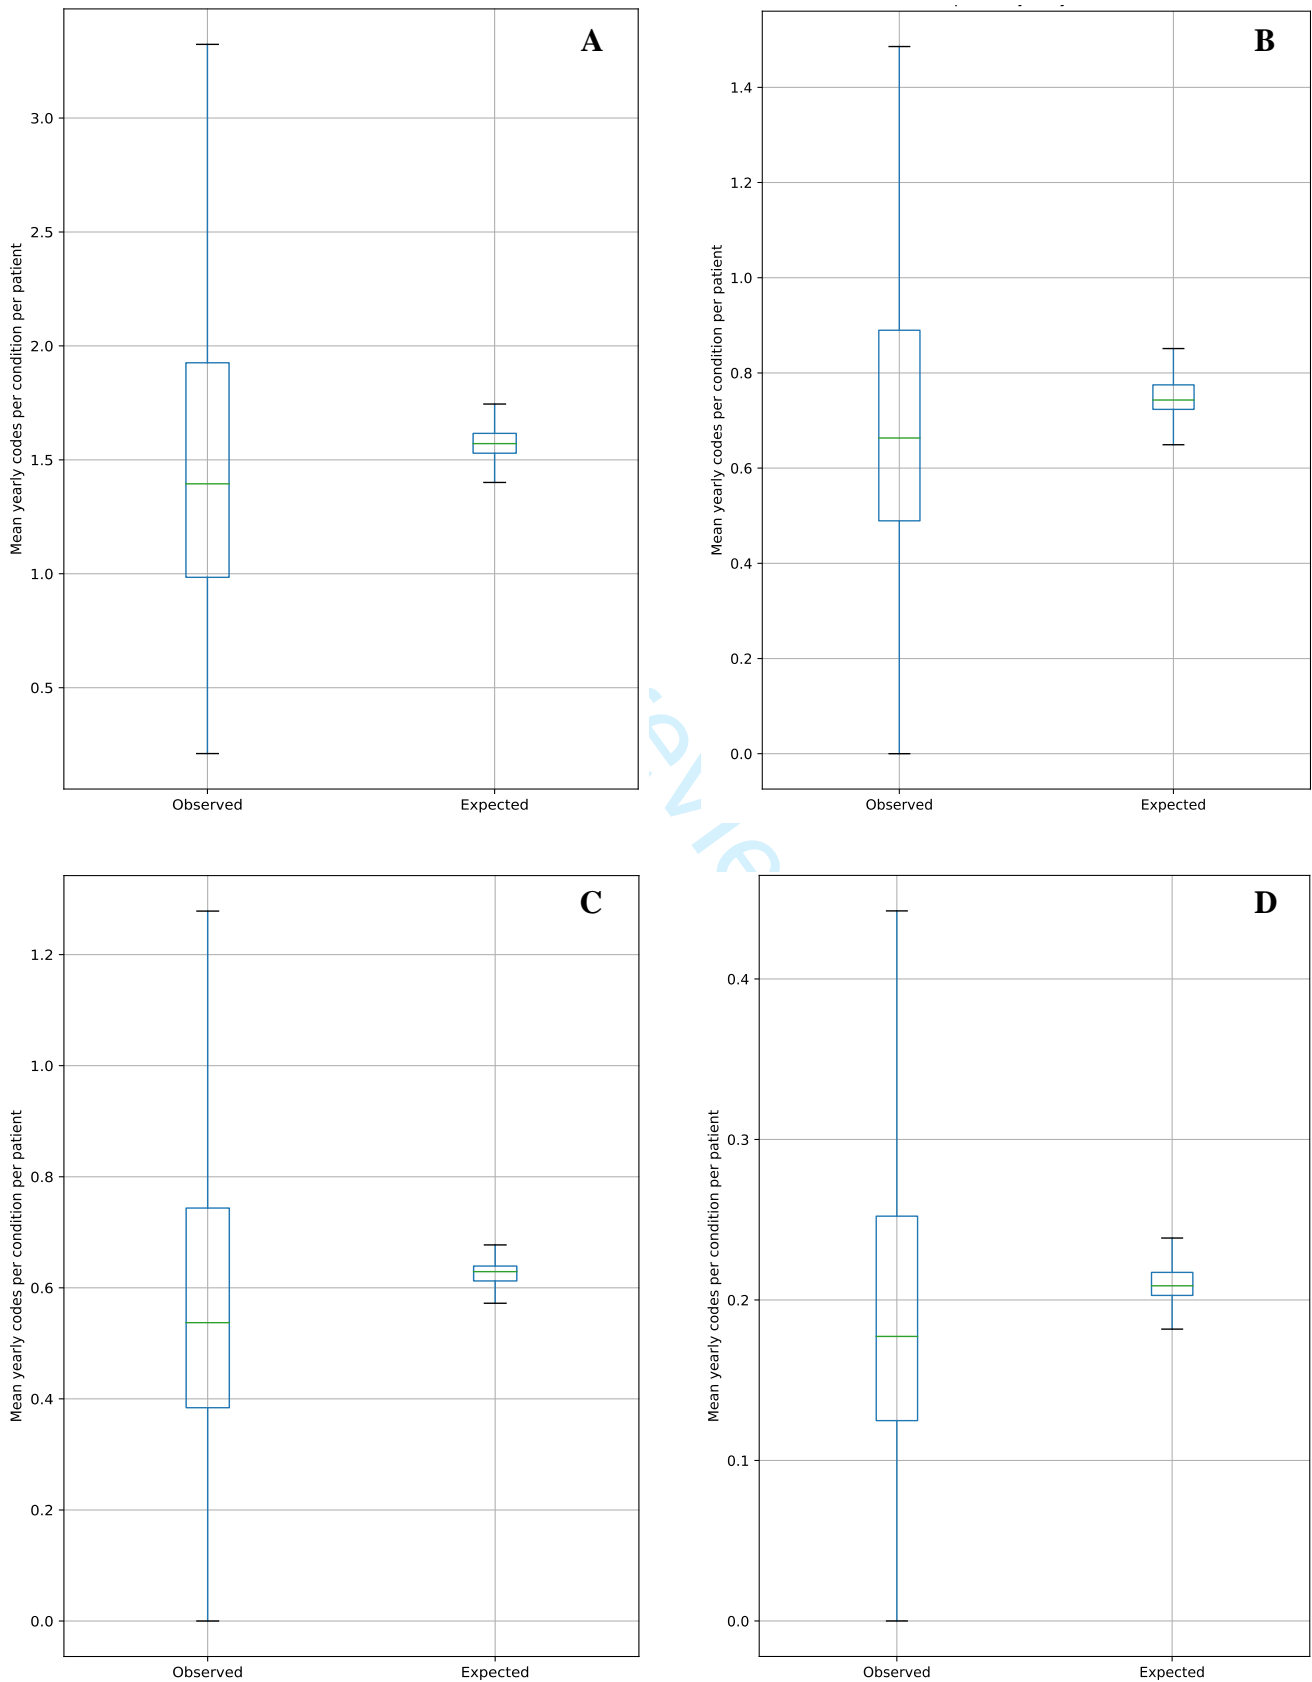

**Appendix Figure A2: ratio of mean yearly codes in year 1 following diagnosis to subsequent years for QOF conditions**

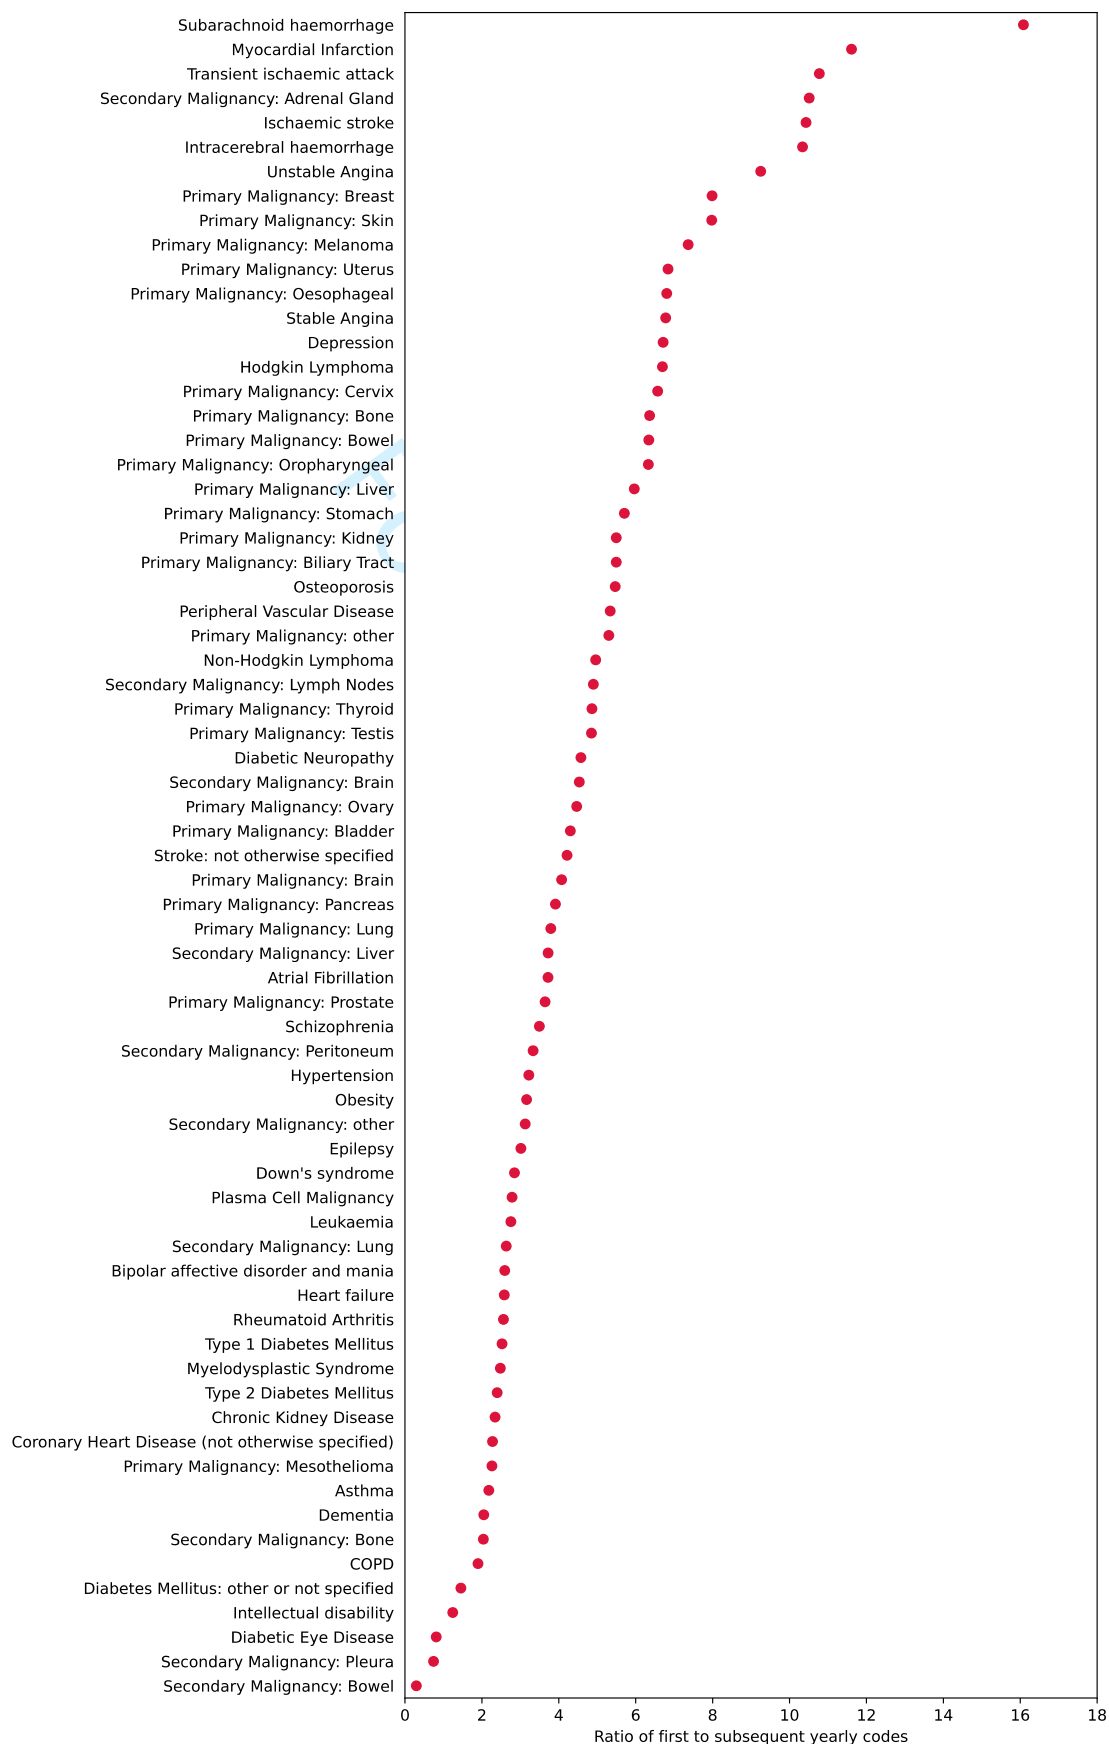

**Appendix Figure A3: Ratio of mean yearly codes in year 1 following diagnosis to subsequent years for non-QOF conditions**

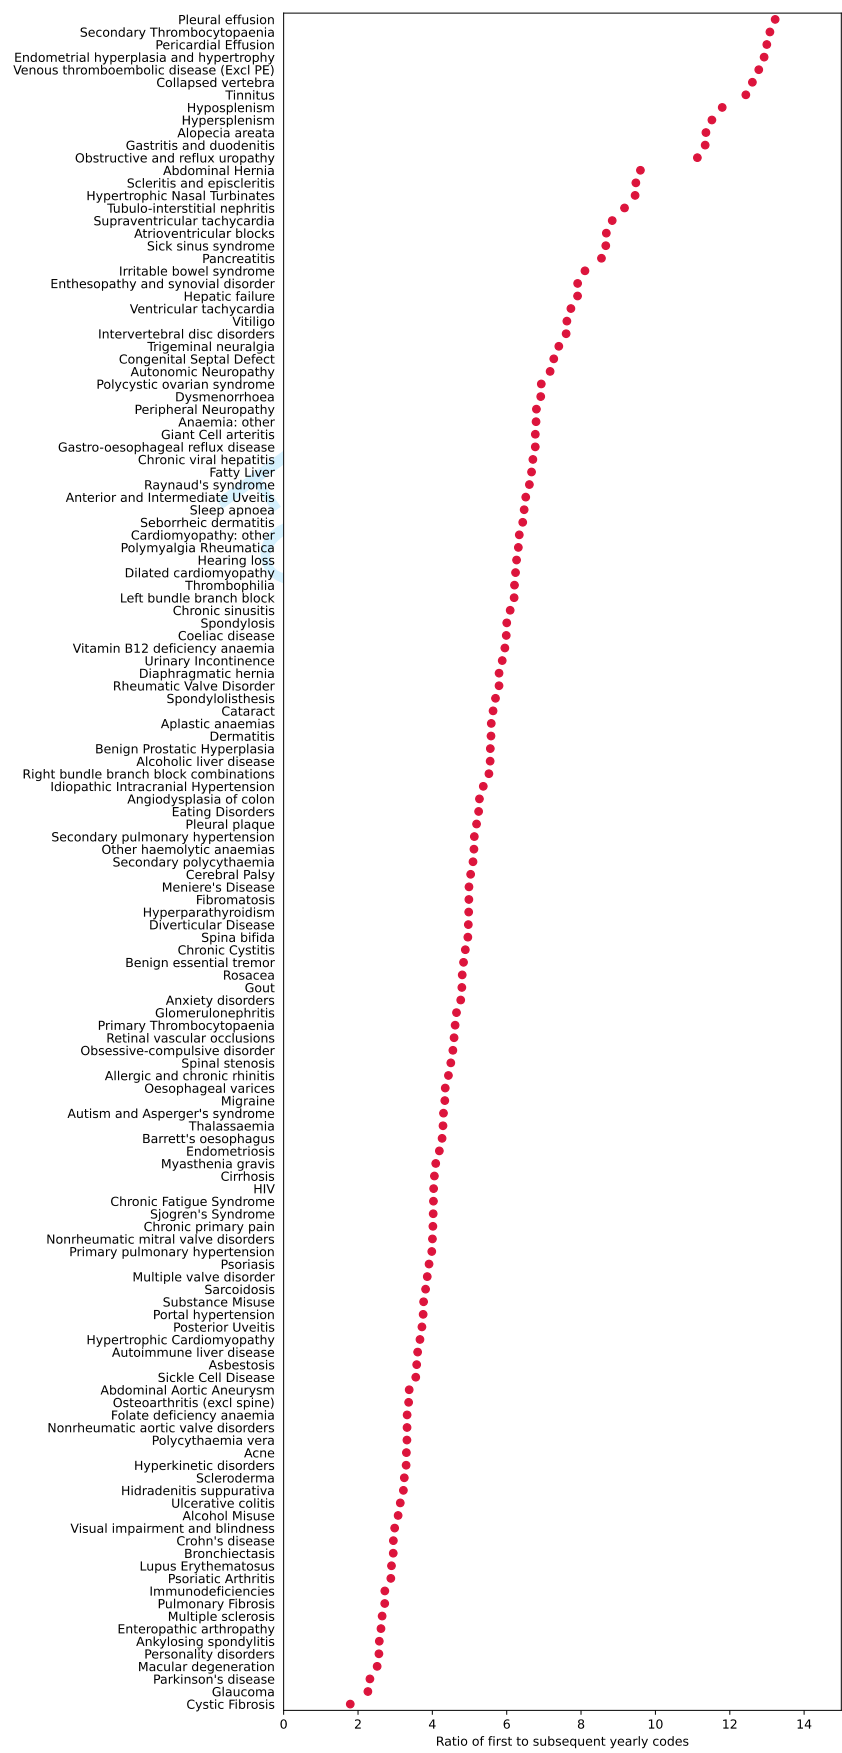



**Appendix Figure A4: Boxplots of the distribution of mean yearly codes following diagnosis for newly diagnosed conditions by GP practice stratified by inclusion in QOF**

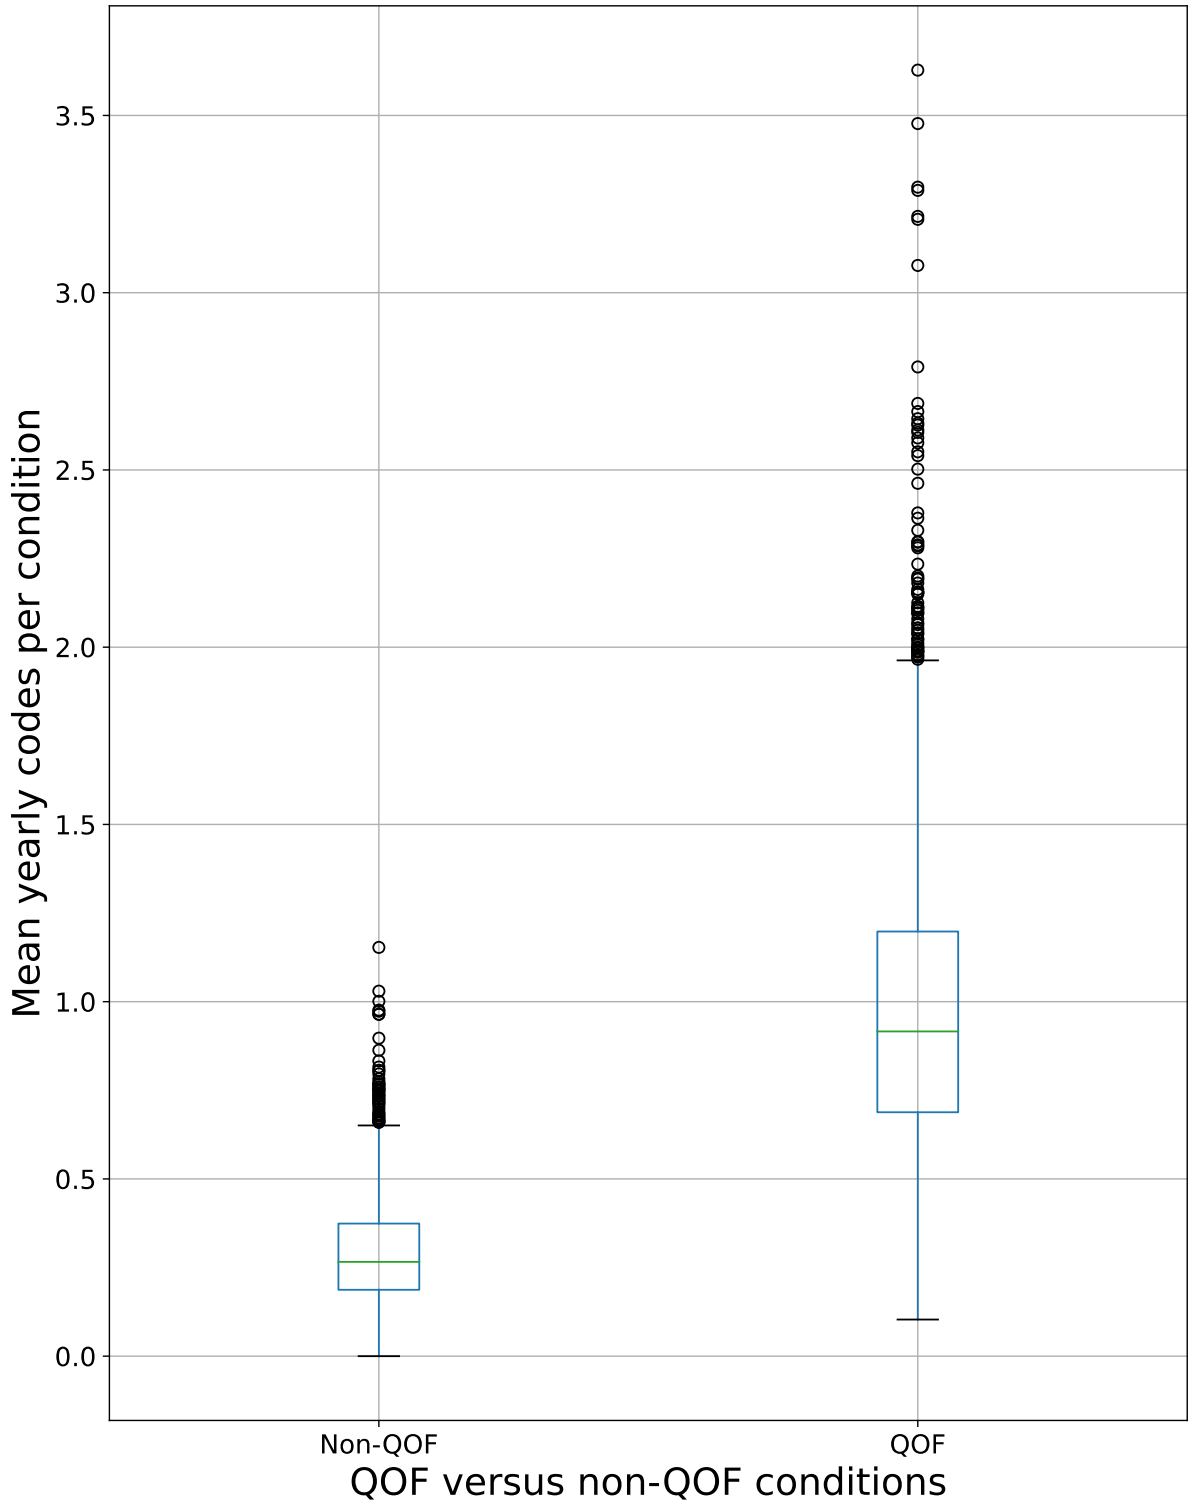

**Appendix Figure A5: boxplots of mean yearly codes at a GP practice level by practice level Index of Multiple Deprivation decile (1 = most deprived, 10 = least deprived)**

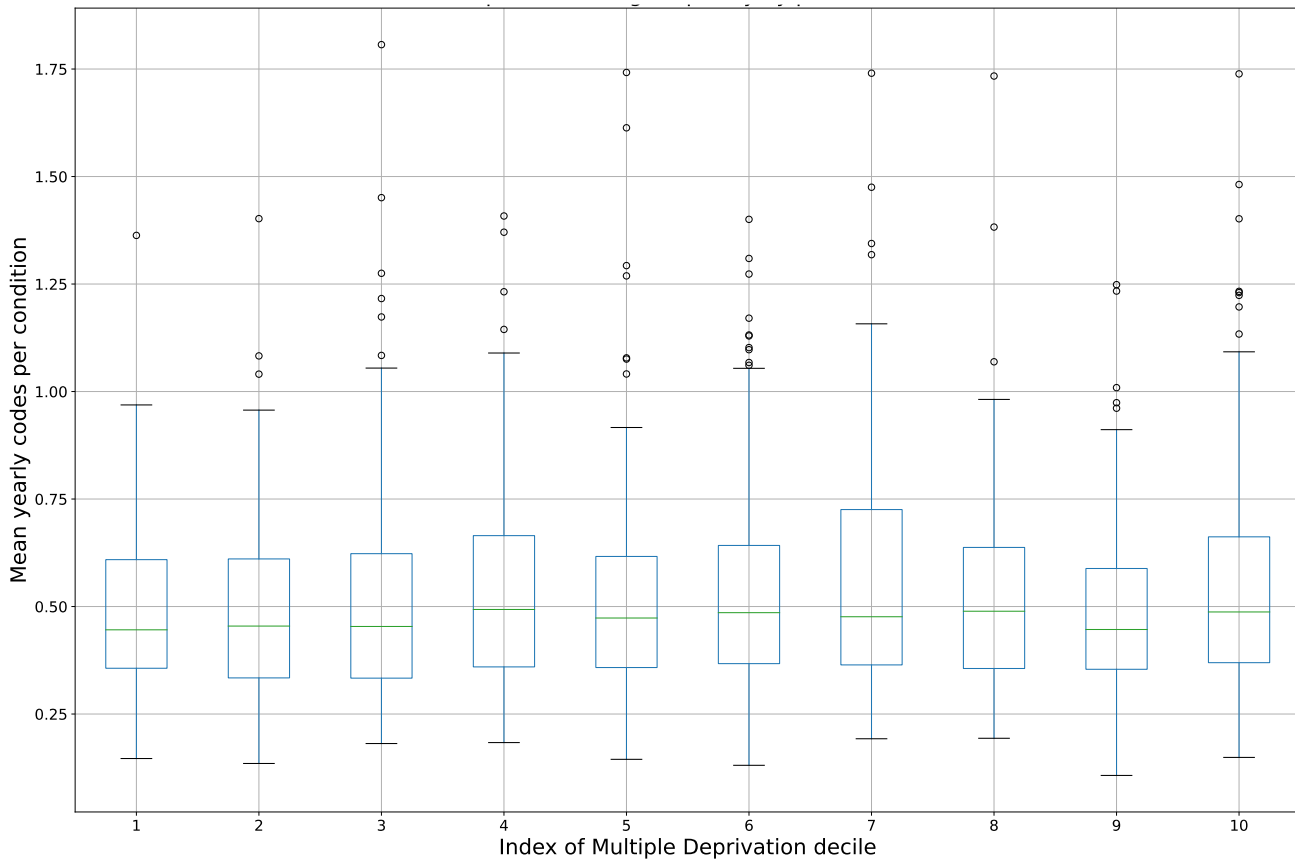

Footnote: combines QOF and non-QOF conditions

Review only

Table A3: Associations of rate of codes in year one following diagnosis for conditions included in QOF (N=1730485)

| Variable                                         | Primary analysis |         |        |       | Sensitivity analysis including consultation number |         |        |       |
|--------------------------------------------------|------------------|---------|--------|-------|----------------------------------------------------|---------|--------|-------|
|                                                  | IRR              | P-value | 95% CI |       | IRR                                                | P-value | 95% CI |       |
|                                                  |                  |         | Lower  | Upper |                                                    |         | Lower  | Upper |
| <b>Age category (years)</b>                      |                  |         |        |       |                                                    |         |        |       |
| Under 40                                         | 1.33             | 0.00    | 1.32   | 1.34  | 1.30                                               | 0.00    | 1.29   | 1.31  |
| 40-49                                            | 1.15             | 0.00    | 1.14   | 1.15  | 1.14                                               | 0.00    | 1.13   | 1.15  |
| 50-59                                            | 1.08             | 0.00    | 1.07   | 1.08  | 1.07                                               | 0.00    | 1.07   | 1.08  |
| 60-69 (reference)                                | -                | -       | -      | -     | -                                                  | -       | -      | -     |
| 70-79                                            | 0.96             | 0.00    | 0.95   | 0.96  | 0.94                                               | 0.00    | 0.93   | 0.95  |
| 80 or more                                       | 0.91             | 0.00    | 0.90   | 0.92  | 0.88                                               | 0.00    | 0.87   | 0.88  |
| <b>Sex</b>                                       |                  |         |        |       |                                                    |         |        |       |
| Female (reference)                               | -                | -       | -      | -     | -                                                  | -       | -      | -     |
| Male                                             | 1.03             | 0.00    | 1.02   | 1.03  | 1.10                                               | 0.00    | 1.10   | 1.11  |
| <b>Ethnicity category</b>                        |                  |         |        |       |                                                    |         |        |       |
| White (reference)                                | -                | -       | -      | -     | -                                                  | -       | -      | -     |
| South Asian                                      | 0.96             | 0.00    | 0.95   | 0.97  | 0.92                                               | 0.00    | 0.91   | 0.93  |
| Black                                            | 0.94             | 0.00    | 0.93   | 0.95  | 0.94                                               | 0.00    | 0.93   | 0.95  |
| Other                                            | 0.95             | 0.00    | 0.93   | 0.97  | 0.96                                               | 0.00    | 0.94   | 0.98  |
| Mixed                                            | 0.98             | 0.03    | 0.95   | 1.00  | 0.97                                               | 0.00    | 0.95   | 0.99  |
| Missing                                          | 0.98             | 0.00    | 0.97   | 0.99  | 1.01                                               | 0.00    | 1.00   | 1.02  |
| <b>IMD decile</b>                                |                  |         |        |       |                                                    |         |        |       |
| 1 (most deprived)                                | -                | -       | -      | -     | -                                                  | -       | -      | -     |
| 2                                                | 1.01             | 0.19    | 1.00   | 1.01  | 1.00                                               | 0.95    | 0.99   | 1.01  |
| 3                                                | 1.02             | 0.00    | 1.01   | 1.03  | 1.01                                               | 0.08    | 1.00   | 1.02  |
| 4                                                | 1.02             | 0.00    | 1.01   | 1.03  | 1.01                                               | 0.01    | 1.00   | 1.02  |
| 5                                                | 1.02             | 0.00    | 1.01   | 1.03  | 1.01                                               | 0.06    | 1.00   | 1.02  |
| 6                                                | 1.03             | 0.00    | 1.02   | 1.04  | 1.01                                               | 0.02    | 1.00   | 1.02  |
| 7                                                | 1.04             | 0.00    | 1.03   | 1.05  | 1.02                                               | 0.00    | 1.01   | 1.03  |
| 8                                                | 1.04             | 0.00    | 1.03   | 1.05  | 1.01                                               | 0.01    | 1.00   | 1.02  |
| 9                                                | 1.05             | 0.00    | 1.04   | 1.06  | 1.02                                               | 0.00    | 1.01   | 1.03  |
| 10 (least deprived)                              | 1.05             | 0.00    | 1.04   | 1.06  | 1.01                                               | 0.06    | 1.00   | 1.02  |
| <b>Number of QOF diseases</b>                    |                  |         |        |       |                                                    |         |        |       |
| 0 (reference)                                    | -                | -       | -      | -     | -                                                  | -       | -      | -     |
| 1                                                | 0.90             | 0.00    | 0.90   | 0.91  | 0.87                                               | 0.00    | 0.86   | 0.87  |
| 2                                                | 0.80             | 0.00    | 0.80   | 0.81  | 0.75                                               | 0.00    | 0.75   | 0.76  |
| 3                                                | 0.71             | 0.00    | 0.70   | 0.71  | 0.66                                               | 0.00    | 0.65   | 0.66  |
| 4 or more                                        | 0.63             | 0.00    | 0.62   | 0.63  | 0.56                                               | 0.00    | 0.55   | 0.56  |
| <b>Number of non-QOF diseases</b>                |                  |         |        |       |                                                    |         |        |       |
| 0 (reference)                                    | -                | -       | -      | -     | -                                                  | -       | -      | -     |
| 1                                                | 1.16             | 0.00    | 1.16   | 1.17  | 1.08                                               | 0.00    | 1.07   | 1.08  |
| 2                                                | 1.13             | 0.00    | 1.12   | 1.14  | 1.02                                               | 0.00    | 1.01   | 1.02  |
| 3                                                | 1.12             | 0.00    | 1.11   | 1.12  | 0.97                                               | 0.00    | 0.96   | 0.98  |
| 4 or more                                        | 1.13             | 0.00    | 1.12   | 1.13  | 0.90                                               | 0.00    | 0.89   | 0.90  |
| <b>Calendar year of diagnosis</b>                |                  |         |        |       |                                                    |         |        |       |
| 2015 (reference)                                 | -                | -       | -      | -     | -                                                  | -       | -      | -     |
| 2016                                             | 1.00             | 0.89    | 0.99   | 1.01  | 1.02                                               | 0.00    | 1.02   | 1.03  |
| 2017                                             | 1.00             | 0.34    | 1.00   | 1.01  | 1.05                                               | 0.00    | 1.04   | 1.05  |
| 2018                                             | 1.00             | 0.18    | 0.99   | 1.00  | 1.06                                               | 0.00    | 1.06   | 1.07  |
| 2019                                             | 0.95             | 0.00    | 0.94   | 0.96  | 1.04                                               | 0.00    | 1.04   | 1.05  |
| <b>Average number of consultations in year 1</b> |                  |         |        |       |                                                    |         |        |       |
| Less than 1 (reference)                          | -                | -       | -      | -     | -                                                  | -       | -      | -     |
| 1-2                                              | -                | -       | -      | -     | 1.62                                               | 0.00    | 1.60   | 1.63  |
| 3-4                                              | -                | -       | -      | -     | 2.21                                               | 0.00    | 2.19   | 2.23  |
| 5-9                                              | -                | -       | -      | -     | 2.87                                               | 0.00    | 2.84   | 2.89  |
| 10 or more                                       | -                | -       | -      | -     | 3.75                                               | 0.00    | 3.71   | 3.79  |

From negative binomial regression models, including practice-level fixed effects (not shown)

**Table A4: Associations of rate of codes in year two following diagnosis for conditions included in QOF (N=1714684)**

| Variable                                         | Primary analysis |         |        |       | Sensitivity analysis including consultation number |         |        |       |
|--------------------------------------------------|------------------|---------|--------|-------|----------------------------------------------------|---------|--------|-------|
|                                                  | IRR              | P-value | 95% CI |       | IRR                                                | P-value | 95% CI |       |
|                                                  |                  |         | Lower  | Upper |                                                    |         | Lower  | Upper |
| <b>Age category (years)</b>                      |                  |         |        |       |                                                    |         |        |       |
| Under 40                                         | 0.87             | 0.00    | 0.86   | 0.87  | 0.86                                               | 0.00    | 0.86   | 0.87  |
| 40-49                                            | 1.01             | 0.03    | 1.00   | 1.02  | 1.01                                               | 0.22    | 1.00   | 1.01  |
| 50-59                                            | 1.03             | 0.00    | 1.02   | 1.04  | 1.03                                               | 0.00    | 1.02   | 1.04  |
| 60-69 (reference)                                | -                | -       | -      | -     | -                                                  | -       | -      | -     |
| 70-79                                            | 0.95             | 0.00    | 0.94   | 0.96  | 0.93                                               | 0.00    | 0.93   | 0.94  |
| 80 or more                                       | 0.89             | 0.00    | 0.88   | 0.90  | 0.86                                               | 0.00    | 0.85   | 0.87  |
| <b>Sex</b>                                       |                  |         |        |       |                                                    |         |        |       |
| Female (reference)                               | -                | -       | -      | -     | -                                                  | -       | -      | -     |
| Male                                             | 1.11             | 0.00    | 1.11   | 1.12  | 1.18                                               | 0.00    | 1.17   | 1.18  |
| <b>Ethnicity category</b>                        |                  |         |        |       |                                                    |         |        |       |
| White (reference)                                | -                | -       | -      | -     | -                                                  | -       | -      | -     |
| South Asian                                      | 1.26             | 0.00    | 1.25   | 1.28  | 1.22                                               | 0.00    | 1.20   | 1.23  |
| Black                                            | 1.17             | 0.00    | 1.16   | 1.19  | 1.17                                               | 0.00    | 1.15   | 1.19  |
| Other                                            | 1.13             | 0.00    | 1.10   | 1.16  | 1.14                                               | 0.00    | 1.11   | 1.17  |
| Mixed                                            | 1.12             | 0.00    | 1.08   | 1.15  | 1.11                                               | 0.00    | 1.07   | 1.14  |
| Missing                                          | 0.89             | 0.00    | 0.88   | 0.90  | 0.93                                               | 0.00    | 0.92   | 0.93  |
| <b>IMD decile</b>                                |                  |         |        |       |                                                    |         |        |       |
| 1 (most deprived)                                | -                | -       | -      | -     | -                                                  | -       | -      | -     |
| 2                                                | 1.02             | 0.00    | 1.01   | 1.04  | 1.02                                               | 0.00    | 1.01   | 1.03  |
| 3                                                | 1.03             | 0.00    | 1.02   | 1.05  | 1.03                                               | 0.00    | 1.02   | 1.04  |
| 4                                                | 1.05             | 0.00    | 1.03   | 1.06  | 1.04                                               | 0.00    | 1.03   | 1.05  |
| 5                                                | 1.05             | 0.00    | 1.04   | 1.07  | 1.04                                               | 0.00    | 1.03   | 1.06  |
| 6                                                | 1.06             | 0.00    | 1.05   | 1.07  | 1.05                                               | 0.00    | 1.04   | 1.07  |
| 7                                                | 1.08             | 0.00    | 1.06   | 1.09  | 1.06                                               | 0.00    | 1.05   | 1.08  |
| 8                                                | 1.09             | 0.00    | 1.07   | 1.10  | 1.07                                               | 0.00    | 1.06   | 1.08  |
| 9                                                | 1.11             | 0.00    | 1.10   | 1.13  | 1.09                                               | 0.00    | 1.08   | 1.11  |
| 10 (least deprived)                              | 1.14             | 0.00    | 1.12   | 1.15  | 1.11                                               | 0.00    | 1.09   | 1.12  |
| <b>Number of QOF diseases</b>                    |                  |         |        |       |                                                    |         |        |       |
| 0 (reference)                                    | -                | -       | -      | -     | -                                                  | -       | -      | -     |
| 1                                                | 1.05             | 0.00    | 1.04   | 1.06  | 1.00                                               | 0.79    | 0.99   | 1.01  |
| 2                                                | 1.07             | 0.00    | 1.06   | 1.08  | 0.99                                               | 0.05    | 0.98   | 1.00  |
| 3                                                | 0.99             | 0.15    | 0.98   | 1.00  | 0.91                                               | 0.00    | 0.90   | 0.92  |
| 4 or more                                        | 0.87             | 0.00    | 0.86   | 0.88  | 0.77                                               | 0.00    | 0.76   | 0.78  |
| <b>Number of non-QOF diseases</b>                |                  |         |        |       |                                                    |         |        |       |
| 0 (reference)                                    | -                | -       | -      | -     | -                                                  | -       | -      | -     |
| 1                                                | 1.05             | 0.00    | 1.04   | 1.06  | 0.99                                               | 0.11    | 0.98   | 1.00  |
| 2                                                | 1.04             | 0.00    | 1.03   | 1.05  | 0.96                                               | 0.00    | 0.95   | 0.97  |
| 3                                                | 1.04             | 0.00    | 1.03   | 1.05  | 0.93                                               | 0.00    | 0.92   | 0.94  |
| 4 or more                                        | 1.05             | 0.00    | 1.04   | 1.06  | 0.88                                               | 0.00    | 0.87   | 0.89  |
| <b>Calendar year of diagnosis</b>                |                  |         |        |       |                                                    |         |        |       |
| 2015 (reference)                                 | -                | -       | -      | -     | -                                                  | -       | -      | -     |
| 2016                                             | 1.00             | 0.45    | 0.99   | 1.01  | 1.02                                               | 0.00    | 1.01   | 1.03  |
| 2017                                             | 0.99             | 0.00    | 0.98   | 0.99  | 1.02                                               | 0.00    | 1.01   | 1.03  |
| 2018                                             | 0.91             | 0.00    | 0.90   | 0.92  | 0.96                                               | 0.00    | 0.95   | 0.97  |
| 2019                                             | 0.79             | 0.00    | 0.79   | 0.80  | 0.86                                               | 0.00    | 0.86   | 0.87  |
| <b>Average number of consultations in year 1</b> |                  |         |        |       |                                                    |         |        |       |
| Less than 1 (reference)                          | -                | -       | -      | -     | -                                                  | -       | -      | -     |
| 1-2                                              |                  |         |        |       | 1.53                                               | 0.00    | 1.52   | 1.55  |
| 3-4                                              |                  |         |        |       | 1.87                                               | 0.00    | 1.85   | 1.89  |

|            |  |      |      |      |      |
|------------|--|------|------|------|------|
| 5-9        |  | 2.17 | 0.00 | 2.15 | 2.20 |
| 10 or more |  | 2.59 | 0.00 | 2.57 | 2.62 |

From negative binomial regression models, including practice-level fixed effects (not shown)

**Table A5: Associations of rate of codes in year one following diagnosis for conditions not included in QOF (N=3617348)**

| Variable                                         | Primary analysis |         |        |       | Sensitivity analysis including consultation number |         |        |       |
|--------------------------------------------------|------------------|---------|--------|-------|----------------------------------------------------|---------|--------|-------|
|                                                  | IRR              | P-value | 95% CI |       | IRR                                                | P-value | 95% CI |       |
|                                                  |                  |         | Lower  | Upper |                                                    |         | Lower  | Upper |
| <b>Age category (years)</b>                      |                  |         |        |       |                                                    |         |        |       |
| Under 40                                         | 1.10             | 0.00    | 1.10   | 1.11  | 1.09                                               | 0.00    | 1.08   | 1.10  |
| 40-49                                            | 1.01             | 0.00    | 1.00   | 1.02  | 1.02                                               | 0.00    | 1.01   | 1.03  |
| 50-59                                            | 0.98             | 0.00    | 0.98   | 0.99  | 0.99                                               | 0.09    | 0.99   | 1.00  |
| 60-69 (reference)                                | -                | -       | -      | -     | -                                                  | -       | -      | -     |
| 70-79                                            | 1.05             | 0.00    | 1.05   | 1.06  | 1.03                                               | 0.00    | 1.02   | 1.03  |
| 80 or more                                       | 1.02             | 0.00    | 1.02   | 1.03  | 0.98                                               | 0.00    | 0.97   | 0.99  |
| <b>Sex</b>                                       |                  |         |        |       |                                                    |         |        |       |
| Female (reference)                               | -                | -       | -      | -     | -                                                  | -       | -      | -     |
| Male                                             | 1.00             | 0.03    | 0.99   | 1.00  | 1.13                                               | 0.00    | 1.12   | 1.13  |
| <b>Ethnicity category</b>                        |                  |         |        |       |                                                    |         |        |       |
| White (reference)                                | -                | -       | -      | -     | -                                                  | -       | -      | -     |
| South Asian                                      | 0.95             | 0.00    | 0.94   | 0.96  | 0.89                                               | 0.00    | 0.88   | 0.90  |
| Black                                            | 0.89             | 0.00    | 0.88   | 0.90  | 0.86                                               | 0.00    | 0.85   | 0.87  |
| Other                                            | 0.90             | 0.00    | 0.88   | 0.91  | 0.89                                               | 0.00    | 0.88   | 0.91  |
| Mixed                                            | 0.95             | 0.00    | 0.93   | 0.97  | 0.92                                               | 0.00    | 0.91   | 0.94  |
| Missing                                          | 0.99             | 0.14    | 0.99   | 1.00  | 1.06                                               | 0.00    | 1.05   | 1.06  |
| <b>IMD decile</b>                                |                  |         |        |       |                                                    |         |        |       |
| 1 (most deprived)                                | -                | -       | -      | -     | -                                                  | -       | -      | -     |
| 2                                                | 1.00             | 0.86    | 0.99   | 1.01  | 0.99                                               | 0.06    | 0.98   | 1.00  |
| 3                                                | 1.01             | 0.01    | 1.00   | 1.02  | 1.00                                               | 0.82    | 0.99   | 1.01  |
| 4                                                | 1.02             | 0.00    | 1.01   | 1.03  | 1.00                                               | 0.42    | 0.99   | 1.01  |
| 5                                                | 1.02             | 0.00    | 1.01   | 1.03  | 1.00                                               | 0.86    | 0.99   | 1.01  |
| 6                                                | 1.03             | 0.00    | 1.02   | 1.04  | 0.99                                               | 0.26    | 0.99   | 1.00  |
| 7                                                | 1.03             | 0.00    | 1.02   | 1.04  | 0.99                                               | 0.08    | 0.98   | 1.00  |
| 8                                                | 1.04             | 0.00    | 1.03   | 1.06  | 0.99                                               | 0.15    | 0.98   | 1.00  |
| 9                                                | 1.06             | 0.00    | 1.05   | 1.07  | 0.99                                               | 0.19    | 0.98   | 1.00  |
| 10 (least deprived)                              | 1.06             | 0.00    | 1.05   | 1.07  | 0.98                                               | 0.00    | 0.97   | 0.99  |
| <b>Number of QOF diseases</b>                    |                  |         |        |       |                                                    |         |        |       |
| 0 (reference)                                    | -                | -       | -      | -     | -                                                  | -       | -      | -     |
| 1                                                | 1.16             | 0.00    | 1.15   | 1.16  | 1.02                                               | 0.00    | 1.02   | 1.03  |
| 2                                                | 1.09             | 0.00    | 1.08   | 1.09  | 0.94                                               | 0.00    | 0.93   | 0.94  |
| 3                                                | 1.06             | 0.00    | 1.05   | 1.07  | 0.90                                               | 0.00    | 0.89   | 0.91  |
| 4 or more                                        | 1.04             | 0.00    | 1.03   | 1.04  | 0.85                                               | 0.00    | 0.84   | 0.85  |
| <b>Number of non-QOF diseases</b>                |                  |         |        |       |                                                    |         |        |       |
| 0 (reference)                                    | -                | -       | -      | -     | -                                                  | -       | -      | -     |
| 1                                                | 1.02             | 0.00    | 1.01   | 1.02  | 0.93                                               | 0.00    | 0.92   | 0.94  |
| 2                                                | 1.02             | 0.00    | 1.02   | 1.03  | 0.87                                               | 0.00    | 0.87   | 0.88  |
| 3                                                | 1.04             | 0.00    | 1.03   | 1.05  | 0.83                                               | 0.00    | 0.82   | 0.84  |
| 4 or more                                        | 1.06             | 0.00    | 1.06   | 1.07  | 0.74                                               | 0.00    | 0.74   | 0.75  |
| <b>Calendar year of diagnosis</b>                |                  |         |        |       |                                                    |         |        |       |
| 2015 (reference)                                 | -                | -       | -      | -     | -                                                  | -       | -      | -     |
| 2016                                             | 1.00             | 0.55    | 0.99   | 1.00  | 1.03                                               | 0.00    | 1.02   | 1.03  |
| 2017                                             | 0.99             | 0.00    | 0.99   | 1.00  | 1.05                                               | 0.00    | 1.04   | 1.05  |
| 2018                                             | 0.99             | 0.00    | 0.98   | 0.99  | 1.07                                               | 0.00    | 1.06   | 1.07  |
| 2019                                             | 0.94             | 0.00    | 0.94   | 0.95  | 1.06                                               | 0.00    | 1.06   | 1.07  |
| <b>Average number of consultations in year 1</b> |                  |         |        |       |                                                    |         |        |       |
| Less than 1 (reference)                          | -                | -       | -      | -     | -                                                  | -       | -      | -     |

|            |  |      |      |      |      |
|------------|--|------|------|------|------|
| 1-2        |  | 2.38 | 0.00 | 2.36 | 2.40 |
| 3-4        |  | 3.49 | 0.00 | 3.45 | 3.52 |
| 5-9        |  | 4.67 | 0.00 | 4.62 | 4.71 |
| 10 or more |  | 6.37 | 0.00 | 6.31 | 6.44 |

From negative binomial regression models, including practice-level fixed effects (not shown)

**Table A6: Associations of rate of codes in year two following diagnosis for conditions not included in QOF (N=3593019)**

| Variable                          | Primary analysis |         |        |       | Sensitivity analysis including consultation number |         |        |       |
|-----------------------------------|------------------|---------|--------|-------|----------------------------------------------------|---------|--------|-------|
|                                   | IRR              | P-value | 95% CI |       | IRR                                                | P-value | 95% CI |       |
|                                   |                  |         | Lower  | Upper |                                                    |         | Lower  | Upper |
| <b>Age category (years)</b>       |                  |         |        |       |                                                    |         |        |       |
| Under 40                          | 1.27             | 0.00    | 1.26   | 1.28  | 1.26                                               | 0.00    | 1.25   | 1.28  |
| 40-49                             | 1.03             | 0.00    | 1.02   | 1.04  | 1.03                                               | 0.00    | 1.02   | 1.04  |
| 50-59                             | 0.98             | 0.00    | 0.97   | 0.99  | 0.99                                               | 0.10    | 0.98   | 1.00  |
| 60-69 (reference)                 | -                | -       | -      | -     | -                                                  | -       | -      | -     |
| 70-79                             | 1.06             | 0.00    | 1.05   | 1.07  | 1.03                                               | 0.00    | 1.02   | 1.04  |
| 80 or more                        | 1.06             | 0.00    | 1.05   | 1.08  | 1.01                                               | 0.18    | 1.00   | 1.02  |
| <b>Sex</b>                        |                  |         |        |       |                                                    |         |        |       |
| Female (reference)                | -                | -       | -      | -     | -                                                  | -       | -      | -     |
| Male                              | 0.93             | 0.00    | 0.93   | 0.94  | 1.08                                               | 0.00    | 1.07   | 1.09  |
| <b>Ethnicity category</b>         |                  |         |        |       |                                                    |         |        |       |
| White (reference)                 | -                | -       | -      | -     | -                                                  | -       | -      | -     |
| South Asian                       | 0.99             | 0.17    | 0.97   | 1.00  | 0.92                                               | 0.00    | 0.91   | 0.94  |
| Black                             | 0.94             | 0.00    | 0.92   | 0.95  | 0.91                                               | 0.00    | 0.89   | 0.92  |
| Other                             | 0.88             | 0.00    | 0.86   | 0.91  | 0.89                                               | 0.00    | 0.86   | 0.92  |
| Mixed                             | 0.94             | 0.00    | 0.91   | 0.98  | 0.92                                               | 0.00    | 0.89   | 0.95  |
| Missing                           | 0.96             | 0.00    | 0.95   | 0.97  | 1.05                                               | 0.00    | 1.03   | 1.06  |
| <b>IMD decile</b>                 |                  |         |        |       |                                                    |         |        |       |
| 1 (most deprived)                 | -                | -       | -      | -     | -                                                  | -       | -      | -     |
| 2                                 | 1.01             | 0.10    | 1.00   | 1.03  | 1.00                                               | 0.79    | 0.99   | 1.02  |
| 3                                 | 1.03             | 0.00    | 1.02   | 1.05  | 1.02                                               | 0.00    | 1.01   | 1.04  |
| 4                                 | 1.04             | 0.00    | 1.02   | 1.05  | 1.02                                               | 0.01    | 1.01   | 1.04  |
| 5                                 | 1.05             | 0.00    | 1.04   | 1.07  | 1.03                                               | 0.00    | 1.01   | 1.04  |
| 6                                 | 1.06             | 0.00    | 1.04   | 1.08  | 1.03                                               | 0.00    | 1.01   | 1.04  |
| 7                                 | 1.07             | 0.00    | 1.06   | 1.09  | 1.03                                               | 0.00    | 1.01   | 1.05  |
| 8                                 | 1.10             | 0.00    | 1.08   | 1.11  | 1.04                                               | 0.00    | 1.03   | 1.06  |
| 9                                 | 1.13             | 0.00    | 1.11   | 1.14  | 1.06                                               | 0.00    | 1.04   | 1.08  |
| 10 (least deprived)               | 1.14             | 0.00    | 1.12   | 1.16  | 1.06                                               | 0.00    | 1.04   | 1.08  |
| <b>Number of QOF diseases</b>     |                  |         |        |       |                                                    |         |        |       |
| 0 (reference)                     | -                | -       | -      | -     | -                                                  | -       | -      | -     |
| 1                                 | 1.19             | 0.00    | 1.18   | 1.21  | 1.05                                               | 0.00    | 1.04   | 1.06  |
| 2                                 | 1.15             | 0.00    | 1.14   | 1.16  | 0.98                                               | 0.00    | 0.97   | 0.99  |
| 3                                 | 1.13             | 0.00    | 1.12   | 1.15  | 0.95                                               | 0.00    | 0.94   | 0.96  |
| 4 or more                         | 1.16             | 0.00    | 1.14   | 1.17  | 0.93                                               | 0.00    | 0.92   | 0.94  |
| <b>Number of non-QOF diseases</b> |                  |         |        |       |                                                    |         |        |       |
| 0 (reference)                     | -                | -       | -      | -     | -                                                  | -       | -      | -     |
| 1                                 | 1.04             | 0.00    | 1.03   | 1.06  | 0.94                                               | 0.00    | 0.93   | 0.95  |
| 2                                 | 1.09             | 0.00    | 1.08   | 1.11  | 0.90                                               | 0.00    | 0.89   | 0.91  |
| 3                                 | 1.13             | 0.00    | 1.11   | 1.14  | 0.86                                               | 0.00    | 0.85   | 0.87  |
| 4 or more                         | 1.21             | 0.00    | 1.20   | 1.23  | 0.80                                               | 0.00    | 0.79   | 0.81  |
| <b>Calendar year of diagnosis</b> |                  |         |        |       |                                                    |         |        |       |
| 2015 (reference)                  | -                | -       | -      | -     | -                                                  | -       | -      | -     |
| 2016                              | 1.00             | 0.56    | 0.99   | 1.01  | 1.03                                               | 0.00    | 1.02   | 1.04  |
| 2017                              | 1.00             | 0.43    | 0.99   | 1.01  | 1.06                                               | 0.00    | 1.05   | 1.07  |
| 2018                              | 0.91             | 0.00    | 0.90   | 0.92  | 1.01                                               | 0.01    | 1.00   | 1.02  |
| 2019                              | 0.79             | 0.00    | 0.79   | 0.80  | 0.93                                               | 0.00    | 0.92   | 0.94  |

| Average number of consultations in year 1 |  |      |      |      |      |
|-------------------------------------------|--|------|------|------|------|
| Less than 1 (reference)                   |  | -    | -    | -    | -    |
| 1-2                                       |  | 2.76 | 0.00 | 2.72 | 2.81 |
| 3-4                                       |  | 4.06 | 0.00 | 4.00 | 4.12 |
| 5-9                                       |  | 5.40 | 0.00 | 5.32 | 5.48 |
| 10 or more                                |  | 7.35 | 0.00 | 7.24 | 7.47 |

From negative binomial regression models, including practice-level fixed effects (not shown)

For peer review only

## References

1. Head, A. *et al.* Inequalities in incident and prevalent multimorbidity in England, 2004–2013: a population-based, descriptive study. *The Lancet Healthy Longevity* **2**, e489–e497 (2021).
2. Kuan, V. *et al.* A chronological map of 308 physical and mental health conditions from 4 million individuals in the English National Health Service. *The Lancet Digital Health* **1**, e63–e77 (2019).
3. Bisquera, A. *et al.* Inequalities in developing multimorbidity over time: A population-based cohort study from an urban, multi-ethnic borough in the United Kingdom. *Lancet Reg Health Eur* **12**, 100247 (2021).
4. Ashworth, M. *et al.* Journey to multimorbidity: longitudinal analysis exploring cardiovascular risk factors and sociodemographic determinants in an urban setting. *BMJ Open* **9**, (2019).
5. NHS Health and Social Care Information Centre. National Quality and Outcomes Framework Statistics for England 2004/05. <https://files.digital.nhs.uk/publicationimport/pub01xxx/pub01946/qof-eng-04-05-rep.pdf>.
6. Health & Social Care Information Centre. Quality and Outcomes Framework – Prevalence, Achievements and Exceptions Report. England, 2013-14. <https://files.digital.nhs.uk/publicationimport/pub15xxx/pub15751/qof-1314-report-v1.1.pdf>.
7. Health & Social Care Information Centre. Quality and Outcomes Framework – Prevalence, Achievements and Exceptions Report, England, 2014-15. <https://files.digital.nhs.uk/publicationimport/pub18xxx/pub18887/qof-1415-report%20v1.1.pdf> (2015).



**The RECORD statement – checklist of items, extended from the STROBE statement, that should be reported in observational studies using routinely collected health data.**

|                           | Item No. | STROBE items                                                                                                                                                                               | Location in manuscript where items are reported | RECORD items                                                                                                                                                                                                                                                                                                                                                                                                                                | Location in manuscript where items are reported |
|---------------------------|----------|--------------------------------------------------------------------------------------------------------------------------------------------------------------------------------------------|-------------------------------------------------|---------------------------------------------------------------------------------------------------------------------------------------------------------------------------------------------------------------------------------------------------------------------------------------------------------------------------------------------------------------------------------------------------------------------------------------------|-------------------------------------------------|
| <b>Title and abstract</b> |          |                                                                                                                                                                                            |                                                 |                                                                                                                                                                                                                                                                                                                                                                                                                                             |                                                 |
|                           | 1        | (a) Indicate the study's design with a commonly used term in the title or the abstract (b) Provide in the abstract an informative and balanced summary of what was done and what was found | p1-3                                            | RECORD 1.1: The type of data used should be specified in the title or abstract. When possible, the name of the databases used should be included.<br><br>RECORD 1.2: If applicable, the geographic region and timeframe within which the study took place should be reported in the title or abstract.<br><br>RECORD 1.3: If linkage between databases was conducted for the study, this should be clearly stated in the title or abstract. | p1<br><br>p2<br><br>N/A                         |
| <b>Introduction</b>       |          |                                                                                                                                                                                            |                                                 |                                                                                                                                                                                                                                                                                                                                                                                                                                             |                                                 |
| Background rationale      | 2        | Explain the scientific background and rationale for the investigation being reported                                                                                                       | p4-5                                            |                                                                                                                                                                                                                                                                                                                                                                                                                                             |                                                 |
| Objectives                | 3        | State specific objectives, including any prespecified hypotheses                                                                                                                           | p5                                              |                                                                                                                                                                                                                                                                                                                                                                                                                                             |                                                 |
| <b>Methods</b>            |          |                                                                                                                                                                                            |                                                 |                                                                                                                                                                                                                                                                                                                                                                                                                                             |                                                 |
| Study Design              | 4        | Present key elements of study design early in the paper                                                                                                                                    | p5                                              |                                                                                                                                                                                                                                                                                                                                                                                                                                             |                                                 |
| Setting                   | 5        | Describe the setting, locations, and relevant dates, including periods of recruitment, exposure, follow-up, and data collection                                                            | p5                                              |                                                                                                                                                                                                                                                                                                                                                                                                                                             |                                                 |

|                              |   |                                                                                                                                                                                                                                                                                                                                                                                                                                                                                                                                                                                                                                                                                                                              |                      |                                                                                                                                                                                                                                                                                                                                                                                                                                                                                                                                                                                                                                                                                                      |    |
|------------------------------|---|------------------------------------------------------------------------------------------------------------------------------------------------------------------------------------------------------------------------------------------------------------------------------------------------------------------------------------------------------------------------------------------------------------------------------------------------------------------------------------------------------------------------------------------------------------------------------------------------------------------------------------------------------------------------------------------------------------------------------|----------------------|------------------------------------------------------------------------------------------------------------------------------------------------------------------------------------------------------------------------------------------------------------------------------------------------------------------------------------------------------------------------------------------------------------------------------------------------------------------------------------------------------------------------------------------------------------------------------------------------------------------------------------------------------------------------------------------------------|----|
| Participants                 | 6 | <p>(a) <i>Cohort study</i> - Give the eligibility criteria, and the sources and methods of selection of participants. Describe methods of follow-up</p> <p><i>Case-control study</i> - Give the eligibility criteria, and the sources and methods of case ascertainment and control selection. Give the rationale for the choice of cases and controls</p> <p><i>Cross-sectional study</i> - Give the eligibility criteria, and the sources and methods of selection of participants</p> <p>(b) <i>Cohort study</i> - For matched studies, give matching criteria and number of exposed and unexposed</p> <p><i>Case-control study</i> - For matched studies, give matching criteria and the number of controls per case</p> | p5 and appendix p2   | <p>RECORD 6.1: The methods of study population selection (such as codes or algorithms used to identify subjects) should be listed in detail. If this is not possible, an explanation should be provided.</p> <p>RECORD 6.2: Any validation studies of the codes or algorithms used to select the population should be referenced. If validation was conducted for this study and not published elsewhere, detailed methods and results should be provided.</p> <p>RECORD 6.3: If the study involved linkage of databases, consider use of a flow diagram or other graphical display to demonstrate the data linkage process, including the number of individuals with linked data at each stage.</p> | p5 |
| Variables                    | 7 | Clearly define all outcomes, exposures, predictors, potential confounders, and effect modifiers. Give diagnostic criteria, if applicable.                                                                                                                                                                                                                                                                                                                                                                                                                                                                                                                                                                                    | p5 and appendix p2-3 | RECORD 7.1: A complete list of codes and algorithms used to classify exposures, outcomes, confounders, and effect modifiers should be provided. If these cannot be reported, an explanation should be provided.                                                                                                                                                                                                                                                                                                                                                                                                                                                                                      |    |
| Data sources/<br>measurement | 8 | For each variable of interest, give sources of data and details of methods of assessment (measurement). Describe comparability of assessment methods if there is more than one group                                                                                                                                                                                                                                                                                                                                                                                                                                                                                                                                         | p5 and appendix p2-3 |                                                                                                                                                                                                                                                                                                                                                                                                                                                                                                                                                                                                                                                                                                      |    |

|                                                                                                                                                    |                                  |    |                                                                                                                                                                                                                                                                                                                                                                                                                                                                                                                                                                      |      |                                                                                                                                                       |    |
|----------------------------------------------------------------------------------------------------------------------------------------------------|----------------------------------|----|----------------------------------------------------------------------------------------------------------------------------------------------------------------------------------------------------------------------------------------------------------------------------------------------------------------------------------------------------------------------------------------------------------------------------------------------------------------------------------------------------------------------------------------------------------------------|------|-------------------------------------------------------------------------------------------------------------------------------------------------------|----|
| 1<br>2<br>3<br>4                                                                                                                                   | Bias                             | 9  | Describe any efforts to address potential sources of bias                                                                                                                                                                                                                                                                                                                                                                                                                                                                                                            | p6-7 |                                                                                                                                                       |    |
| 5<br>6<br>7<br>8<br>9                                                                                                                              | Study size                       | 10 | Explain how the study size was arrived at                                                                                                                                                                                                                                                                                                                                                                                                                                                                                                                            | p8   |                                                                                                                                                       |    |
| 10<br>11<br>12<br>13<br>14<br>15<br>16<br>17<br>18<br>19<br>20<br>21<br>22<br>23<br>24<br>25<br>26<br>27<br>28<br>29<br>30<br>31<br>32<br>33<br>34 | Quantitative variables           | 11 | Explain how quantitative variables were handled in the analyses. If applicable, describe which groupings were chosen, and why                                                                                                                                                                                                                                                                                                                                                                                                                                        | P5-6 |                                                                                                                                                       |    |
| 35<br>36<br>37<br>38<br>39<br>40<br>41<br>42<br>43<br>44<br>45<br>46<br>47                                                                         | Statistical methods              | 12 | (a) Describe all statistical methods, including those used to control for confounding<br>(b) Describe any methods used to examine subgroups and interactions<br>(c) Explain how missing data were addressed<br>(d) <i>Cohort study</i> - If applicable, explain how loss to follow-up was addressed<br><i>Case-control study</i> - If applicable, explain how matching of cases and controls was addressed<br><i>Cross-sectional study</i> - If applicable, describe analytical methods taking account of sampling strategy<br>(e) Describe any sensitivity analyses | p6-7 |                                                                                                                                                       |    |
|                                                                                                                                                    | Data access and cleaning methods |    | ..                                                                                                                                                                                                                                                                                                                                                                                                                                                                                                                                                                   |      | RECORD 12.1: Authors should describe the extent to which the investigators had access to the database population used to create the study population. | p5 |

|                  |    |                                                                                                                                                                                                                                                                                                                                                 |             |                                                                                                                                                                                                                                                                                                                    |     |
|------------------|----|-------------------------------------------------------------------------------------------------------------------------------------------------------------------------------------------------------------------------------------------------------------------------------------------------------------------------------------------------|-------------|--------------------------------------------------------------------------------------------------------------------------------------------------------------------------------------------------------------------------------------------------------------------------------------------------------------------|-----|
|                  |    |                                                                                                                                                                                                                                                                                                                                                 |             | RECORD 12.2: Authors should provide information on the data cleaning methods used in the study.                                                                                                                                                                                                                    |     |
| Linkage          |    | ..                                                                                                                                                                                                                                                                                                                                              |             | RECORD 12.3: State whether the study included person-level, institutional-level, or other data linkage across two or more databases. The methods of linkage and methods of linkage quality evaluation should be provided.                                                                                          | N/A |
| <b>Results</b>   |    |                                                                                                                                                                                                                                                                                                                                                 |             |                                                                                                                                                                                                                                                                                                                    |     |
| Participants     | 13 | (a) Report the numbers of individuals at each stage of the study ( <i>e.g.</i> , numbers potentially eligible, examined for eligibility, confirmed eligible, included in the study, completing follow-up, and analysed)<br>(b) Give reasons for non-participation at each stage.<br>(c) Consider use of a flow diagram                          | p8          | RECORD 13.1: Describe in detail the selection of the persons included in the study ( <i>i.e.</i> , study population selection) including filtering based on data quality, data availability and linkage. The selection of included persons can be described in the text and/or by means of the study flow diagram. | p8  |
| Descriptive data | 14 | (a) Give characteristics of study participants ( <i>e.g.</i> , demographic, clinical, social) and information on exposures and potential confounders<br>(b) Indicate the number of participants with missing data for each variable of interest<br>(c) <i>Cohort study</i> - summarise follow-up time ( <i>e.g.</i> , average and total amount) | p8, Table 1 |                                                                                                                                                                                                                                                                                                                    |     |
| Outcome data     | 15 | <i>Cohort study</i> - Report numbers of outcome events or summary measures over time<br><i>Case-control study</i> - Report numbers in each exposure                                                                                                                                                                                             | p9-10       |                                                                                                                                                                                                                                                                                                                    |     |

|                   |    |                                                                                                                                                                                                                                                                                                                                                                                                                 |                    |                                                                                                                                                                                                                                                                                                          |     |
|-------------------|----|-----------------------------------------------------------------------------------------------------------------------------------------------------------------------------------------------------------------------------------------------------------------------------------------------------------------------------------------------------------------------------------------------------------------|--------------------|----------------------------------------------------------------------------------------------------------------------------------------------------------------------------------------------------------------------------------------------------------------------------------------------------------|-----|
|                   |    | category, or summary measures of exposure<br><i>Cross-sectional study</i> - Report numbers of outcome events or summary measures                                                                                                                                                                                                                                                                                |                    |                                                                                                                                                                                                                                                                                                          |     |
| Main results      | 16 | (a) Give unadjusted estimates and, if applicable, confounder-adjusted estimates and their precision (e.g., 95% confidence interval). Make clear which confounders were adjusted for and why they were included<br>(b) Report category boundaries when continuous variables were categorized<br>(c) If relevant, consider translating estimates of relative risk into absolute risk for a meaningful time period | p9-14, Figures 1-3 |                                                                                                                                                                                                                                                                                                          |     |
| Other analyses    | 17 | Report other analyses done— e.g., analyses of subgroups and interactions, and sensitivity analyses                                                                                                                                                                                                                                                                                                              | p11                |                                                                                                                                                                                                                                                                                                          |     |
| <b>Discussion</b> |    |                                                                                                                                                                                                                                                                                                                                                                                                                 |                    |                                                                                                                                                                                                                                                                                                          |     |
| Key results       | 18 | Summarise key results with reference to study objectives                                                                                                                                                                                                                                                                                                                                                        | p15                |                                                                                                                                                                                                                                                                                                          |     |
| Limitations       | 19 | Discuss limitations of the study, taking into account sources of potential bias or imprecision. Discuss both direction and magnitude of any potential bias                                                                                                                                                                                                                                                      | p17                | RECORD 19.1: Discuss the implications of using data that were not created or collected to answer the specific research question(s). Include discussion of misclassification bias, unmeasured confounding, missing data, and changing eligibility over time, as they pertain to the study being reported. | p17 |
| Interpretation    | 20 | Give a cautious overall interpretation of results considering objectives,                                                                                                                                                                                                                                                                                                                                       | p15, p17-18        |                                                                                                                                                                                                                                                                                                          |     |

|                                                           |    |                                                                                                                                                               |     |                                                                                                                                                          |     |
|-----------------------------------------------------------|----|---------------------------------------------------------------------------------------------------------------------------------------------------------------|-----|----------------------------------------------------------------------------------------------------------------------------------------------------------|-----|
|                                                           |    | limitations, multiplicity of analyses, results from similar studies, and other relevant evidence                                                              |     |                                                                                                                                                          |     |
| Generalisability                                          | 21 | Discuss the generalisability (external validity) of the study results                                                                                         | p17 |                                                                                                                                                          |     |
| <b>Other Information</b>                                  |    |                                                                                                                                                               |     |                                                                                                                                                          |     |
| Funding                                                   | 22 | Give the source of funding and the role of the funders for the present study and, if applicable, for the original study on which the present article is based | p18 |                                                                                                                                                          |     |
| Accessibility of protocol, raw data, and programming code |    | ..                                                                                                                                                            |     | RECORD 22.1: Authors should provide information on how to access any supplemental information such as the study protocol, raw data, or programming code. | p18 |

\*Reference: Benchimol EI, Smeeth L, Guttman A, Harron K, Moher D, Petersen I, Sørensen HT, von Elm E, Langan SM, the RECORD Working Committee. The REporting of studies Conducted using Observational Routinely-collected health Data (RECORD) Statement. *PLoS Medicine* 2015; in press.

\*Checklist is protected under Creative Commons Attribution ([CC BY](https://creativecommons.org/licenses/by/4.0/)) license.

# BMJ Open

## Identifying potential biases in code sequences in primary care electronic healthcare records: a retrospective cohort study of the determinants of code frequency

|                                 |                                                                                                                                                                                                                                                                                                                                                                                                                                                                                                                                                                                                                                                                                                                                                                                                                                                                   |
|---------------------------------|-------------------------------------------------------------------------------------------------------------------------------------------------------------------------------------------------------------------------------------------------------------------------------------------------------------------------------------------------------------------------------------------------------------------------------------------------------------------------------------------------------------------------------------------------------------------------------------------------------------------------------------------------------------------------------------------------------------------------------------------------------------------------------------------------------------------------------------------------------------------|
| Journal:                        | <i>BMJ Open</i>                                                                                                                                                                                                                                                                                                                                                                                                                                                                                                                                                                                                                                                                                                                                                                                                                                                   |
| Manuscript ID                   | bmjopen-2023-072884.R1                                                                                                                                                                                                                                                                                                                                                                                                                                                                                                                                                                                                                                                                                                                                                                                                                                            |
| Article Type:                   | Original research                                                                                                                                                                                                                                                                                                                                                                                                                                                                                                                                                                                                                                                                                                                                                                                                                                                 |
| Date Submitted by the Author:   | 03-Jul-2023                                                                                                                                                                                                                                                                                                                                                                                                                                                                                                                                                                                                                                                                                                                                                                                                                                                       |
| Complete List of Authors:       | <p>Beaney, Thomas; Imperial College London, Department of Primary Care and Public Health; Imperial College London, Department of Mathematics</p> <p>Clarke, Jonathan; Imperial College of Science Technology and Medicine, Institute of Global Health Innovation</p> <p>Salman, David; Imperial College London Department of Primary Care and Public Health; Imperial College London Faculty of Medicine, MSk lab</p> <p>Woodcock, Thomas; Imperial College London, Department of Primary Care and Public Health</p> <p>Majeed, Azeem; Imperial College London, Department of Primary Care and Public Health</p> <p>Barahona, Mauricio; Imperial College London, Centre for Mathematics of Precision Healthcare; Imperial College London, Department of Mathematics</p> <p>Aylin, Paul; Imperial College London, Department of Primary Care and Public Health</p> |
| <b>Primary Subject Heading</b>: | Health informatics                                                                                                                                                                                                                                                                                                                                                                                                                                                                                                                                                                                                                                                                                                                                                                                                                                                |
| Secondary Subject Heading:      | General practice / Family practice, Health informatics, Health services research, Epidemiology                                                                                                                                                                                                                                                                                                                                                                                                                                                                                                                                                                                                                                                                                                                                                                    |
| Keywords:                       | EPIDEMIOLOGY, Primary Health Care, Health informatics < BIOTECHNOLOGY & BIOINFORMATICS, STATISTICS & RESEARCH METHODS                                                                                                                                                                                                                                                                                                                                                                                                                                                                                                                                                                                                                                                                                                                                             |
|                                 |                                                                                                                                                                                                                                                                                                                                                                                                                                                                                                                                                                                                                                                                                                                                                                                                                                                                   |

SCHOLARONE™  
Manuscripts



I, the Submitting Author has the right to grant and does grant on behalf of all authors of the Work (as defined in the below author licence), an exclusive licence and/or a non-exclusive licence for contributions from authors who are: i) UK Crown employees; ii) where BMJ has agreed a CC-BY licence shall apply, and/or iii) in accordance with the terms applicable for US Federal Government officers or employees acting as part of their official duties; on a worldwide, perpetual, irrevocable, royalty-free basis to BMJ Publishing Group Ltd ("BMJ") its licensees and where the relevant Journal is co-owned by BMJ to the co-owners of the Journal, to publish the Work in this journal and any other BMJ products and to exploit all rights, as set out in our [licence](#).

The Submitting Author accepts and understands that any supply made under these terms is made by BMJ to the Submitting Author unless you are acting as an employee on behalf of your employer or a postgraduate student of an affiliated institution which is paying any applicable article publishing charge ("APC") for Open Access articles. Where the Submitting Author wishes to make the Work available on an Open Access basis (and intends to pay the relevant APC), the terms of reuse of such Open Access shall be governed by a Creative Commons licence – details of these licences and which [Creative Commons](#) licence will apply to this Work are set out in our licence referred to above.

Other than as permitted in any relevant BMJ Author's Self Archiving Policies, I confirm this Work has not been accepted for publication elsewhere, is not being considered for publication elsewhere and does not duplicate material already published. I confirm all authors consent to publication of this Work and authorise the granting of this licence.



1  
2  
3 **Identifying potential biases in code sequences in primary care electronic healthcare**  
4 **records: a retrospective cohort study of the determinants of code frequency**  
5  
6  
7

8 Beaney T<sup>1,2</sup> (0000-0001-9709-7264), Clarke J<sup>2</sup>, Salman D<sup>1,3</sup>, Woodcock T<sup>1</sup>, Majeed A<sup>1</sup>,  
9 Barahona M<sup>2</sup>, Aylin P<sup>1</sup>  
10  
11  
12

- 13  
14 1. Department of Primary Care and Public Health, Imperial College London, London,  
15 W6 8RP, United Kingdom  
16  
17 2. Centre for Mathematics of Precision Healthcare, Department of Mathematics,  
18 Imperial College London, London, SW7 2AZ, United Kingdom  
19  
20 3. MSk Lab, Department of Surgery and Cancer, Faculty of Medicine, Imperial College  
21 London, London, UK  
22  
23  
24

25  
26 Corresponding Author:

27 Dr Thomas Beaney

28  
29 Department of Primary Care and Public Health, Imperial College London, London, W6 8RP,  
30 United Kingdom  
31

32 Email: [thomas.beaney@imperial.ac.uk](mailto:thomas.beaney@imperial.ac.uk)  
33  
34  
35  
36  
37  
38  
39  
40  
41  
42  
43  
44  
45  
46  
47  
48  
49  
50  
51  
52  
53  
54  
55  
56  
57  
58  
59  
60

## Abstract

### Objectives

To determine whether the frequency of diagnostic codes for long-term conditions (LTCs) in primary care electronic health records (EHRs) is associated with i) disease coding incentives, ii) GP practice, iii) patient socio-demographic characteristics and iv) calendar year of diagnosis.

### Design

Retrospective cohort study.

### Setting

General practices in England from 2015 to 2022 contributing to the Clinical Practice Research Datalink Aurum dataset.

### Participants

All patients registered to a GP with at least one incident LTC diagnosed between 01/01/2015 and 31/12/2019.

### Primary and secondary outcome measures

The number of diagnostic codes for an LTC in i) the first and ii) the second year following diagnosis, stratified by inclusion in the Quality and Outcomes Framework (QOF) financial incentive programme.

### Results

3,113,724 patients were included, with 7,723,365 incident LTCs. Conditions included in QOF had higher rates of annual coding than conditions not included in QOF (1.03 vs 0.32 per year,  $p < 0.0001$ ). There was significant variation in code frequency by GP practice which was not explained by patient socio-demographics. We found significant associations with patient socio-demographics, with a trend towards lower coding rates in people living in areas of higher deprivation for both QOF and non-QOF conditions. Code frequency was lower for conditions with follow-up time in 2020, associated with the onset of the COVID-19 pandemic.

### Conclusions

The frequency of diagnostic codes for newly diagnosed LTCs is influenced by factors including patient socio-demographics, disease inclusion in QOF, GP practice, and the impact of the COVID-19 pandemic. Natural language processing or other methods using temporally-ordered code sequences should account for these factors to minimise potential bias.

### Strengths and limitations

- This study used a large and representative sample of patients in England, including 3 million patients with one of 208 incident diseases developed over 5 years.
- We focussed on incident diseases during the study period to minimise bias from historic or inactive diseases.
- We found significant differences in the frequency of codes according to patient socio-demographics, GP practice, and disease inclusion in QOF, but could not determine whether these differences reflect differences in healthcare utilisation versus coding quality.

## Background

Methods developed in natural language processing (NLP) are increasingly being employed to analyse routinely collected healthcare data, such as data recorded in the Electronic Healthcare Record (EHR).<sup>1-6</sup> These methods show promise across a range of tasks, including prediction of health outcomes,<sup>1,5,6</sup> and clustering of co-occurring diseases.<sup>2</sup> Although developed for the analysis of language data, such as the free text data found in 'unstructured' medical records, NLP methods can also be applied to coded or 'structured' data found in many EHR databases. Using structured data, disease codes arranged in a temporal sequence in a patient's EHR history can be considered analogous to words in a sentence or document.<sup>5</sup>

In primary care EHRs, diagnostic codes may be entered either during a consultation, or entered outside, such as on receiving communication of a new diagnosis from hospital, or retrospectively coding a pre-existing diagnosis. In predictive modelling scenarios, such as those used in NLP, codes from both sources are relevant to understanding a patient's health status. However, a potential problem facing sequence-based methods is the extent to which repeated codes are an objective marker of a patient's health status and a presentation with a particular condition or relate to the quality of coding in the EHR.<sup>7</sup> Although previous studies of EHR data in England have shown the prevalence of many long-term conditions (LTCs) to be comparable to those from national statistics, these are often calculated based on the presence of a single diagnostic code.<sup>8</sup> Whether repeated codes for LTCs are entered in the EHR subsequently may be determined by a range of factors, including patient characteristics, clinician incentives and organisational policies, which may vary over time.<sup>9,10</sup>

Unlike in secondary care, where diagnostic coding directly impacts on payments, General Practice in England receives funding primarily through capitated payments based on the size of the registered population<sup>11</sup> with no direct financial incentive for code entry during a consultation. However, around 10% of funding comes from the Quality and Outcomes Framework (QOF), introduced in the National Health Service for GPs in 2004.<sup>11</sup> QOF provides financial incentives for meeting targets for a set of chronic conditions, including regular clinical reviews, and has been credited with improvements to data collection for these conditions.<sup>12-14</sup> Codes for conditions in QOF may occur more frequently than for conditions not included in the incentive scheme, which could affect sequence-based methods using recurrent codes.

1  
2  
3 Analytical methods using temporally-ordered code sequences in the EHR may therefore be  
4 susceptible to biases in the frequency of codes entered following diagnosis, potentially  
5 resulting in models representing some people better than others. Awareness of the factors  
6 influencing the frequency of codes may help researchers using NLP methods by informing  
7 adjustment or sensitivity analyses. This study aims firstly to compare the frequency of  
8 repeated codes after diagnosis for a common set of LTCs. Secondly, we aim to determine  
9 whether the frequency of codes varies according to i) disease inclusion in QOF, ii) GP  
10 practice, iii) patient socio-demographic characteristics, and iv) calendar year of diagnosis.  
11  
12  
13  
14  
15  
16  
17  
18  
19

## 20 **Methods**

### 21 **Data source**

22  
23  
24 This study used data from the Clinical Practice Research Datalink (CPRD) Aurum dataset,  
25 which contains primary care data for GP practices using EMIS Web software.<sup>15</sup> We included  
26 all patients assessed by CPRD to be research acceptable (meeting certain quality criteria such  
27 as a valid registration date and date of birth<sup>16</sup>) with a continuous period of registration at a GP  
28 practice in CPRD between 1<sup>st</sup> January 2014 and 31<sup>st</sup> December 2020 (i.e. without having  
29 deregistered in this period).<sup>17</sup> Patients were eligible if aged 18 years or over with at least one  
30 incident disease diagnosed between 1<sup>st</sup> January 2015 and 31<sup>st</sup> December 2019, allowing for at  
31 least one full year of practice registration before disease diagnosis and at least one full year of  
32 follow-up for each condition. Demographic data included age, sex, ethnicity and Index of  
33 Multiple Deprivation (IMD) of the area in which the patient resided, grouped into deciles  
34 where 1 is the most deprived and 10 the least deprived.<sup>18</sup> Ethnicity is recorded as one of five  
35 categories, with recording in CPRD found previously to have high concordance with national  
36 estimates.<sup>19</sup> We focussed on incident diseases to reduce the potential for confounding from  
37 historic conditions, some of which may no longer be active. Patients were followed up until  
38 the earliest of death, de-registration or the date of latest data extraction from their GP  
39 practice. Further information on the cohort structure is given in the appendix (p2).  
40  
41  
42  
43  
44  
45  
46  
47  
48  
49  
50  
51  
52  
53  
54

### 55 **Disease definitions**

56 Diagnostic codes were extracted from the CPRD 'Observation' table and codes recorded  
57 during or outside of consultations were included. The date of the event ('obsdate') was used,  
58 in preference to the date the code was entered. We included a total of 208 LTCs. These were  
59  
60

defined based on a set of disease codes from Head *et al* (2021), who selected 211 chronic conditions from 308 acute and chronic disease phenotypes developed for the CALIBER study.<sup>20,21</sup> We reviewed codes and made changes to the code-lists for diabetes and added a new condition of ‘chronic primary pain’ (see appendix p2-3). We excluded conditions based only on laboratory results or anthropometric measurement codes as these may have different characteristics of coding frequency. As a result, measures of raised cholesterol used in the original CALIBER study were excluded. We also excluded BMI and eGFR measurements but included the diagnostic codes for obesity and Chronic Kidney Disease. We considered a single code as diagnostic for each condition and defined the diagnosis date for each condition as the date of the earliest code for that condition. Diseases were stratified according to whether they appeared in QOF by two primary care clinicians, TB and DS (see appendix p2-3).

## Statistical analysis

### Descriptive statistics

For each disease newly diagnosed during the study period, we calculated the yearly number of subsequent codes (excluding the first code representing diagnosis) during follow-up:

$$y_i = \frac{\sum_{j=1}^N c_{i,j}}{\sum_{j=1}^N f_{i,j}}$$

where  $y_i$  is the yearly number of codes following diagnosis for condition  $i$ ,  $c_{i,j}$  is the count of codes for condition  $i$  in patient  $j$ , and  $f_{i,j}$  is the number of years of follow-up for condition  $i$  in patient  $j$ . T-tests were used to compare the mean yearly number of codes for QOF versus non-QOF conditions.

To examine variation in disease coding frequency by GP practice, we calculated, for each practice  $k$ , the mean number of codes per year for newly diagnosed diseases,  $p_k$ :

$$p_k = \frac{\sum_{j=1}^N \sum_{i=1}^M c_{i,j,k}}{\sum_{j=1}^N \sum_{i=1}^M f_{i,j,k}}$$

where  $c_{i,j,k}$  is the count of codes for condition  $i$  in patient  $j$  in practice  $k$ , and  $f_{i,j,k}$  is the number of years of follow-up for condition  $i$  in patient  $j$  in practice  $k$ . We then calculated the Pearson correlation coefficient between the mean number of codes per year in each practice

1  
2  
3 for QOF versus non-QOF conditions. We also compared the mean number of yearly codes in  
4 each practice stratified by the 2019 IMD decile of the GP practice. For conditions with at  
5 least two years of follow-up after the date of diagnosis, we calculated the ratio of the number  
6 of codes in the first year of diagnosis to the number of codes in subsequent years.  
7  
8  
9

### 10 11 Regression analyses

12 Data were formatted as panel data with patients measured over multiple calendar years  
13 (appendix Table A1). We used mixed effects negative binomial regression to analyse the  
14 association between code frequency of newly diagnosed conditions in i) the first year  
15 following diagnosis and ii) the second year following diagnosis, with patient factors and  
16 calendar year of diagnosis. We separated the outcome variable (code frequency) into first and  
17 second year after diagnosis due to preliminary analyses indicating significant differences over  
18 time. We also stratified the regression analyses by QOF inclusion, given our hypothesis that  
19 it may be an effect modifier of the relationships. To account for cases where a patient may  
20 have more than one QOF or non-QOF condition diagnosed within the same year, we  
21 averaged the code frequency for all newly diagnosed QOF or non-QOF conditions in each  
22 calendar year.  
23  
24  
25  
26  
27  
28  
29  
30  
31  
32  
33

34 Included as covariates in the model were patient socio-demographic factors including age,  
35 sex, ethnicity and IMD decile of residence. We also included the count of QOF and non-QOF  
36 conditions for each patient. Due to small numbers, we excluded patients with gender recorded  
37 in CPRD as 'indeterminate' or with missing IMD deciles. Age and the count of QOF and  
38 non-QOF conditions were time-updated at the start of each calendar year, and other  
39 covariates were held fixed. We incorporated random effects for patient and fixed effects for  
40 calendar year as we wished to explicitly model the effect of time. Use of a Poisson model  
41 was considered, but the conditional variance was found to be significantly higher than the  
42 conditional mean ( $p < 0.001$ ) indicating a negative binomial to have better fit.<sup>22</sup> Model fit was  
43 assessed by calculating randomized quantile residuals, which indicated no departure from  
44 normality on quantile-quantile plots.<sup>23,24</sup>  
45  
46  
47  
48  
49  
50  
51  
52  
53

54 For each regression model, we calculated the predicted count of disease codes for each  
55 patient per year and then calculated the mean for each GP practice. This indicated that  
56 significant variation remained in the mean counts according to GP practice (appendix Figure  
57 A1). We therefore incorporated fixed effects for GP practice within the regression models to  
58  
59  
60

1  
2  
3 account for practice-level variation (see appendix p5 for model equation). We also compared  
4 the Akaike Information Criteria (AIC) of models with and without practice fixed effects.  
5  
6  
7

8 To assess whether code frequency was a function of overall number of primary care  
9 consultations, we conducted a sensitivity analysis including average number of yearly  
10 consultations (irrespective of condition) in year 1 or year 2 added as a covariate into the main  
11 regression models (categorised into <1, 1-2, 3-4, 5-9 or 10 or more). Python version 3.10.6  
12 and Pandas version 1.4.3 were used in data processing and plots and Stata version 17.0 and R  
13 studio version 4.2.1 were used for regression analyses.  
14  
15  
16  
17  
18  
19

### 20 **Patient and Public Involvement**

21 This research programme is supported by a patient and public advisory group who fed back  
22 to the researchers on the diseases included in the study but were not directly involved in this  
23 study.  
24  
25  
26  
27  
28  
29  
30  
31  
32  
33  
34  
35  
36  
37  
38  
39  
40  
41  
42  
43  
44  
45  
46  
47  
48  
49  
50  
51  
52  
53  
54  
55  
56  
57  
58  
59  
60



## Results

A total of 6,174,115 patients aged 18 years or over and with a continuous registration period between 1<sup>st</sup> January 2014 and 31<sup>st</sup> December 2020 were eligible for inclusion in the study. Of these, 3,113,724 (50.4%) had at least one incident disease diagnosed between 1<sup>st</sup> January 2015 and 31<sup>st</sup> December 2019. Characteristics of the eligible population are shown in Table 1. 21.4% of patients were aged between 18-40 years as of the study start date, and 7.0% were aged 80 years or over. There were more women than men (54.1% versus 45.9%), most (76.7%) were of White ethnicity and there were relatively more patients in more deprived IMD deciles (51.7% in the most deprived half). Of patients with pre-existing conditions developed before the study start date, 31.6% had one or more QOF conditions, and 71.3% had one or more non-QOF conditions. Hypertension was the most prevalent pre-existing condition (24.1%), and the frequency of all pre-existing conditions are shown in the appendix Table A2. The 3,060,391 patients who were not eligible (as they did not develop an incident disease over the study period), were more likely to be younger and more likely to be male than those eligible (appendix Table A3).

**Table 1: Socio-demographic characteristics of patients included in the study**

| Patient characteristic                  | Total          | Percent |
|-----------------------------------------|----------------|---------|
| <b>Age (years)</b>                      |                |         |
| 18-39                                   | 665543         | 21.4%   |
| 40-49                                   | 562934         | 18.1%   |
| 50-59                                   | 604284         | 19.4%   |
| 60-69                                   | 585062         | 18.8%   |
| 70-79                                   | 476626         | 15.3%   |
| 80+                                     | 219275         | 7.0%    |
| <b>Gender</b>                           |                |         |
| Female                                  | 1684942        | 54.1%   |
| Male                                    | 1428734        | 45.9%   |
| Indeterminate                           | 48             | <0.1%   |
| <b>Ethnicity</b>                        |                |         |
| White                                   | 2388332        | 76.7%   |
| South Asian                             | 194477         | 6.2%    |
| Black                                   | 103504         | 3.3%    |
| Other                                   | 36430          | 1.2%    |
| Mixed                                   | 27572          | 0.9%    |
| Missing                                 | 363409         | 11.7%   |
| <b>IMD decile</b>                       |                |         |
| 1 (most deprived)                       | 358948         | 11.5%   |
| 2                                       | 320042         | 10.3%   |
| 3                                       | 320340         | 10.3%   |
| 4                                       | 323782         | 10.4%   |
| 5                                       | 287114         | 9.2%    |
| 6                                       | 303798         | 9.8%    |
| 7                                       | 304044         | 9.8%    |
| 8                                       | 298185         | 9.6%    |
| 9                                       | 305563         | 9.8%    |
| 10 (least deprived)                     | 290214         | 9.3%    |
| Missing                                 | 1694           | 0.1%    |
| <b>Pre-existing QOF conditions*</b>     |                |         |
| 0                                       | 2130680        | 68.4%   |
| 1                                       | 393905         | 12.7%   |
| 2                                       | 224147         | 7.2%    |
| 3                                       | 142104         | 4.6%    |
| 4 or more                               | 222888         | 7.2%    |
| <b>Pre-existing non-QOF conditions*</b> |                |         |
| 0                                       | 893765         | 28.7%   |
| 1                                       | 561300         | 18.0%   |
| 2                                       | 506053         | 16.3%   |
| 3                                       | 386912         | 12.4%   |
| 4 or more                               | 765694         | 24.6%   |
| <b>Total</b>                            | <b>3113724</b> |         |

\* Pre-existing conditions defined as of study start date

### Code frequency by disease and by time from diagnosis

A total of 7,723,365 diseases were diagnosed during the study period with follow-up times for each disease ranging from 1.0 to 7.2 years (mean 4.1 years). There was substantial variation in the yearly code frequency after diagnosis for each condition diagnosed during the study period. Diabetes (types 1, 2 and unspecified), polymyalgia rheumatica, motor neurone disease and dementia had the highest median number of codes per year (appendix Table A4). For many chronic diseases, yearly code frequency was low, for example, only 5% of patients with spina bifida had  $\geq 0.5$  codes per year. Conditions included in QOF on average had significantly higher mean number of yearly codes (1.03) than conditions not included in QOF (0.32;  $p < 0.0001$ ).

The number of codes was higher in the first year after diagnosis than in subsequent years for almost all conditions, except for secondary bowel or pleural malignancy and diabetic eye disease, for which code frequency was higher on average after the first year of diagnosis. QOF conditions on average had lower ratios of codes in the first compared to subsequent years than non-QOF conditions (4.8 versus 5.7 times higher in year 1). However, diseases representing major cardiovascular events, such as myocardial infarction, were coded much more frequently in the first year from diagnosis than in subsequent years (appendix Figure A2 and Figure A3).

### Variation in coding frequency by GP practice

There was a wide range in the mean yearly number of codes per condition between GP practices, with higher code frequency for QOF compared to non-QOF conditions (appendix Figure A4). There was a strong correlation ( $r = 0.88$ ) between GP practice mean code frequency for QOF and non-QOF conditions, indicating that those practices with high code frequency for QOF conditions also had high code frequency for non-QOF conditions (Figure 1). There was no observed trend according to the GP practice-level IMD decile (appendix Figure A5).

**Figure 1: Scatterplot of mean yearly number of codes following diagnosis for QOF versus non-QOF conditions for each GP practice**

1  
2  
3 We calculated the expected counts of codes for new diseases in year 1 and year 2 following  
4 diagnosis, predicted from negative binomial regression models. Expected mean counts per  
5 condition at GP practice level showed substantially less variation compared to the observed  
6 mean counts for both QOF and non-QOF conditions in year 1 and year 2 (appendix Figure  
7 A1) indicating substantial residual practice level variation independent of patient socio-  
8 demographic factors.  
9  
10  
11  
12  
13  
14  
15  
16

### 17 **Variation in disease frequency by socio-demographics and over time**

18 We found significant associations between code frequency in year 1 and year 2 following  
19 diagnosis with patient socio-demographic factors and calendar year of diagnosis for both  
20 QOF and non-QOF diseases from mixed effects negative binomial regression, after  
21 adjustment for number of pre-existing conditions (Figures 2 and 3, and appendix Tables A5 –  
22 A8). Inclusion of GP practice fixed effects in the regression models resulted in very similar  
23 coefficients for patient sociodemographic factors, and a significantly lower AIC indicating  
24 better model fit and so results are presented including practice-level effects.  
25  
26  
27  
28  
29  
30  
31

#### 32 Associations with QOF conditions

33 Younger patients tended to have a higher frequency of codes in the first year following  
34 diagnosis compared to older patients (Figure 1). However, in the second year from diagnosis,  
35 there was a U-shaped relationship with age, with the youngest and oldest age groups having  
36 the lowest rate of codes. Males had on average a small 3% increase (95% CI: 1.03 – 1.03) in  
37 the incidence rate of codes in year 1 and 11% (95% CI: 1.11 – 1.12) increase in year 2  
38 compared with females. There was a strong relationship with ethnicity, with people of non-  
39 White ethnicities having lower rates of code frequency than people of White ethnicity in year  
40 1, but higher rates in year 2. There was a strong trend towards higher code frequency in year  
41 1 and year 2 with decreasing levels of deprivation.  
42  
43  
44  
45  
46  
47  
48  
49  
50

#### 51 Associations with non-QOF conditions

52 For conditions not included in QOF, relationships were more consistent across year 1 and  
53 year 2 following diagnosis (Figure 2). The 18–40-year age group had the highest rate of  
54 codes in both year 1 and year 2, with only small differences between other age groups. There  
55 was no difference in the rate of codes in males and females in year 1, but males had a lower  
56 rate of codes in year 2. Lower rates of codes were found in people of non-White ethnicities  
57  
58  
59  
60

1  
2  
3 compared to people of White ethnicity, except for South Asian ethnicity in year 2. Similar to  
4 QOF conditions, there was a strong trend towards higher code rates in year 1 and year 2 with  
5 decreasing deprivation.  
6  
7  
8  
9

#### 10 Associations with calendar year

11 For both QOF and non-QOF conditions, code rates were similar for conditions diagnosed in  
12 2016 and 2017 compared with 2015 (Figures 1 and 2). For codes in year 1, rates for  
13 conditions diagnosed in 2018 were similar to 2015, but rates for diseases diagnosed in 2019  
14 were 5% and 6% lower than 2015 for QOF and non-QOF conditions, respectively. For codes  
15 in year 2, rates were significantly lower in 2018 (9% and 9% lower for QOF and non-QOF,  
16 respectively) and 2019 (21% and 21% lower for QOF and non-QOF, respectively) compared  
17 to 2015.  
18  
19  
20  
21  
22  
23  
24  
25

#### 26 Adjustment for total number of consultations

27 A sensitivity analysis was used to adjust for total number of consultations in year 1 or year 2  
28 from diagnosis (Tables A5-A8). Total number of consultations in each year were strongly  
29 linked to the rate of codes. For newly diagnosed QOF conditions, the associations with age,  
30 sex and ethnicity in years 1 and 2 remained significant after adjustment (Tables A5-A6).  
31 However, the association with deprivation was attenuated, although there remained an  
32 association with higher rates of codes with lower deprivation in year 2. For newly diagnosed  
33 non-QOF conditions, after adjustment for consultations, age and ethnicity remained  
34 significantly associated, but males had significantly higher rates of codes than females  
35 (Tables A7-A8). Associations with deprivation were attenuated, but there remained a small  
36 but significant association in year 2.  
37  
38  
39  
40  
41  
42  
43  
44  
45

46 **Figure 2: Associations of rate of codes in year one and year two following diagnosis with**  
47 **patient characteristics and calendar year, for conditions included in the Quality and**  
48 **Outcomes Framework (QOF)**  
49  
50  
51

52 **Figure 3: Associations of rate of codes in year one and year two following diagnosis with**  
53 **patient characteristics and calendar year, for conditions not included in the Quality and**  
54 **Outcomes Framework (QOF)**  
55  
56  
57  
58  
59  
60

## Discussion

With an increased use of NLP methods incorporating temporally-ordered code sequences in the primary care EHR, we need to better understand the structure and frequency of repeated occurrences of diagnostic codes. Our study demonstrates significant associations in the frequency of codes for newly diagnosed conditions according to patient socio-demographic factors, GP practice, disease inclusion in QOF, and calendar year. We are unable to fully assess the extent to which the relationships in our study are explained by the quality of coding, or by how patients use healthcare services for a particular condition. However, a sensitivity analysis adjusting for total number of yearly consultations per patient yielded similar results, suggesting that variation in coding quality is likely to play a role. Our findings have implications for researchers using code sequences, emphasising the importance of considering these factors as potential sources of bias.

### Patient socio-demographics

Patient characteristics including age, sex and ethnicity were strongly linked to code frequency, although associations were inconsistent across QOF and non-QOF conditions, and for QOF conditions, were not consistent across the first and second year from diagnosis. People of non-White ethnicity, for example, had lower code rates for QOF conditions in year 1, but higher in year 2, compared to people of White ethnicity. We found consistent patterns with deprivation, with lower code frequency in people living in more deprived areas. A sensitivity analysis adjusting for total number of consultations attenuated the association with deprivation, suggesting that the relationship of code frequency with deprivation was partially explained by total primary care contacts. These findings likely point to differences in the mix of conditions between patient groups, healthcare seeking behaviours, or access to care. For example, people living in areas of socio-economic deprivation may be less likely to attend for screening, preventive care and ongoing management of chronic diseases. Previous research also suggests that although rates of appointments are similar across deciles of socioeconomic deprivation,<sup>25</sup> the rate of missed appointments increases and consultation length decreases with increasing deprivation, which may impact on code frequency for these groups, rather than indicating differences in healthcare need.<sup>26,27</sup>

### GP practice

Substantial variation was found in the frequency of codes between GP practices, which persisted after accounting for differences in patient mix in terms of age, sex, deprivation,

1  
2  
3 ethnicity, number of chronic conditions and in year of diagnosis. Although this may indicate  
4 unmeasured confounding in the characteristics of patients between practices, it likely  
5 represents policies and practices that influence coding which vary between organisations and  
6 clinicians.<sup>9</sup> For example, some GP practices may be more rigorous about coding data in  
7 clinical consultations and in correspondence from specialist services on diagnoses made in  
8 secondary care. Previous research has suggested that clinicians are more similar to those in  
9 the same practice than they are to clinicians in different practices with respect to treatment  
10 and diagnostic decisions.<sup>28</sup> Variation between clinicians in coding practices is likely to be  
11 significant both within and between practices, but this information was not accessible for the  
12 study, and its analysis would introduce multiple hierarchical dependencies outside the scope  
13 of this work. Future work could consider individual clinician effects on coding practices in  
14 the EHR.  
15  
16  
17  
18  
19  
20  
21  
22  
23  
24  
25

### 26 QOF and non-QOF conditions

27 Code frequency was significantly higher for conditions included in QOF compared to  
28 conditions not included. Previous research has highlighted changes to policies and procedures  
29 within GP practices to meet targets, including improved disease registries, which may lead to  
30 an increased likelihood of a code being entered for a given condition. We found substantial  
31 variation between GP practices in the mean code frequency for QOF conditions, but  
32 interestingly, this was strongly correlated ( $r=0.88$  and Figure 1) with code frequency for non-  
33 QOF conditions, suggesting that practice-level effects impact on coding across all conditions,  
34 rather than specifically those incentivised by QOF. However, it is not possible in our study to  
35 determine whether differences in code frequency between QOF and non-QOF conditions are  
36 explained by greater healthcare need or an increased number of healthcare contacts for QOF  
37 conditions, or are explained by higher likelihood of a condition being coded when a patient  
38 presents.  
39  
40  
41  
42  
43  
44  
45  
46  
47  
48  
49

### 50 Calendar year

51 Accounting for calendar time in analyses of patient trajectories is a methodological concern,  
52 as the further back in time in the medical record, particularly before the advent of the EHR  
53 and QOF, the greater the chance that coding practices, and even disease categories, vary.<sup>29</sup>  
54 Although our study started relatively recently in 2015, and we cannot infer code frequency  
55 before this time, we found consistency in code frequency over a short time-span from 2015-  
56 2017. The decline in year 1 codes in 2019, and year 2 codes in 2018 and 2019 likely relates to  
57  
58  
59  
60



1  
2  
3 the impact of the COVID-19 pandemic which impacted significantly on health services in  
4 England from March 2020.<sup>30</sup> Previous studies have shown reductions in patients presenting  
5 with particular conditions, and a reduction in appointment numbers in primary and secondary  
6 healthcare in England. Analyses reliant on coding frequency should therefore consider using  
7 calendar year in addition to patient age in modelling patient trajectories, or limiting analyses  
8 to defined time period.  
9  
10  
11  
12  
13

### 14 15 **Strengths and limitations**

16  
17 A strength of our study is the inclusion of a large number of patients from a representative  
18 sample of primary care in England which makes our findings generalisable to the national  
19 population.<sup>15</sup> We included only patients with newly incident diseases to minimise potential  
20 confounding from diseases diagnosed historically, some of which might no longer be active.  
21 We also only included patients with continuous follow-up over the study period and with at  
22 least one year of full practice registration to reduce bias from overestimation of incidence  
23 immediately following registration.<sup>17</sup> We also excluded patients who died less than one year  
24 from a new diagnosis, which may impact on disease frequency estimates for disease which  
25 have poor survival. We considered using annualised rates for those with less than a full year  
26 of follow-up, but this resulted in very high annualised counts for some individuals with short  
27 follow-up and might introduce additional bias if patients were to seek out care in advance of  
28 re-registering at another GP practice.  
29  
30  
31  
32  
33  
34  
35  
36  
37  
38

39  
40 Our study has focussed on structured healthcare data, whereas much of the consultation is  
41 recorded as unstructured 'free-text'.<sup>30</sup> Although unstructured primary care data contains  
42 much richer information on the details of a presentation that may not be fully reflected in the  
43 coded entries, this information is not currently available from CPRD, but research in future  
44 could examine the agreement between structured and unstructured primary care EHR data.  
45 This would allow a more robust estimation of the content and diseases covered during a  
46 consultation. We stratified conditions according to QOF status given our hypothesis that it  
47 may influence coding frequency. However, we also found variation within categories; for  
48 example, polymyalgia rheumatica and motor neurone disease, which are not included in  
49 QOF, had high number of yearly codes, whereas cardiovascular events such as Transient  
50 Ischaemic Attack, included in QOF, had low yearly codes. Given the general, comparative  
51 nature of this paper, and its aim to examine relationships over many conditions, a condition-  
52 specific analysis of coding frequency was out of scope.  
53  
54  
55  
56  
57  
58  
59  
60



## Implications for research

Our findings have implications for researchers using code sequences recorded in primary care structured data. The frequency of repeated diagnostic codes relates to patient and condition-specific factors, coding incentives and practice-level factors. Although we cannot determine if these findings represent disease burden and healthcare need, it is likely that biases in coding operate at various levels. Specific approaches to reduce the impact of bias will depend on the methodology, but our work does suggest general principles.

Firstly, to consider the potential for bias within the data source and whether stratification may reduce it, for example, by selecting a smaller number of healthcare organisations or a narrower time period. Secondly, to consider adjustment or inclusion of patient, condition, GP practice and calendar year variables within analytical models. However, such an approach is not always recommended, particularly if prediction is the aim, as inclusion of factors such as ethnicity in algorithms may reinforce existing bias.<sup>31</sup> In NLP, text style transfer is often used as a method to control for different styles of writing, which may have relevance to approaches to account for the different coding styles of clinicians.<sup>32</sup> However, these approaches are complicated within the EHR as people are likely to see multiple different clinicians over time, with a small set of codes recorded at each visit. Finally, it is vital that generated representations or predictions from modelling are evaluated in different patient subgroups.

## Implications for clinical practice

Although difficult to determine the extent to which our findings are attributed to coding quality versus healthcare utilisation, previous studies have reported variability in coding across practices for specific conditions.<sup>33,34</sup> This highlights a need to improve the quality of coding in primary care, given its impact on the reliability and usefulness of the data for secondary purposes such as research. Improving the quality of coding in primary care poses several challenges, due to the different incentives for clinicians, who document most of the consultation in free text.<sup>7</sup> Potential strategies include implementing structured templates for recording consultations, or developing NLP methods capable of interpreting and codifying the free-text documented during clinical encounters, without adding to clinician workload.<sup>7</sup>

## Conclusion

1  
2  
3 Our study found significant variation in the frequency of diagnostic codes recorded in the  
4 primary care EHR after diagnosis, related to patient socio-demographics, coding incentives  
5 and GP practice, and a significant reduction in the frequency of codes associated with the  
6 onset of the COVID-19 pandemic. These factors should be considered by researchers using  
7 NLP methods, or other approaches using temporally ordered sequences of codes in primary  
8 care EHRs, to reduce the risk of bias.  
9  
10  
11  
12  
13  
14

### 15 **Funding**

16 This research is funded through a clinical PhD fellowship awarded to TB from the Wellcome  
17 Trust 4i programme at Imperial College London (grant number N/A). JC acknowledge  
18 support from the Wellcome Trust (grant number N/A). MB acknowledges support from  
19 EPSRC grant EP/N014529/1 supporting the EPSRC Centre for Mathematics of Precision  
20 Healthcare. TW, AM and PA acknowledge support from the National Institute for Health and  
21 Care Research (NIHR) under the Applied Research Collaboration (ARC) Northwest London  
22 (grant number N/A). The views expressed in this publication are those of the authors and not  
23 necessarily those of the NHS, the NIHR, the Wellcome Trust or the Department of Health  
24 and Social Care.  
25  
26  
27  
28  
29  
30  
31  
32  
33

### 34 **Competing interests**

35 The authors have no competing interests to declare  
36  
37  
38  
39

### 40 **Contributor statement**

41 TB conceptualised the study, conducted the data management and formal analysis and wrote  
42 the first draft of the manuscript. TB, JS, DS, TW, AM, MB and PA contributed to the study  
43 design, methodology, interpretation of findings and reviewing and editing the manuscript. TB  
44 is the guarantor and accepts full responsibility for the work and the conduct of the study, had  
45 access to the data, and controlled the decision to publish. The corresponding author attests  
46 that all listed authors meet authorship criteria and that no others meeting the criteria have  
47 been omitted.  
48  
49  
50  
51  
52  
53  
54

### 55 **Data sharing**

56 The data used in this study are not publicly available as access is subject to approval  
57 processes. More information is available from CPRD: <https://cprd.com/research-applications>  
58  
59  
60

## Ethics approval

Data access to the Clinical Practice Research Datalink (CPRD) and ethical approval was granted by CPRD's Research Data Governance Process on 28<sup>th</sup> April 2022 (Protocol reference: 22\_001818).

## Acknowledgements

Data management was provided by the Big Data and Analytical Unit (BDAU) at the Institute of Global Health Innovation (IGHI).

## References

1. Li, Y. *et al.* BEHRT: Transformer for Electronic Health Records. *Sci Rep* **10**, 7155 (2020).
2. Solares, J. R. A. *et al.* Transfer Learning in Electronic Health Records through Clinical Concept Embedding. 1–14 (2021).
3. Altuncu, M. T., Mayer, E., Yaliraki, S. N. & Barahona, M. From free text to clusters of content in health records: an unsupervised graph partitioning approach. *Applied Network Science* **4**, 2 (2019).
4. Kraljevic, Z. *et al.* Multi-domain clinical natural language processing with MedCAT: The Medical Concept Annotation Toolkit. *Artif Intell Med* **117**, 102083 (2021).
5. Rasmy, L., Xiang, Y., Xie, Z., Tao, C. & Zhi, D. Med-BERT: pretrained contextualized embeddings on large-scale structured electronic health records for disease prediction. *npj Digit. Med.* **4**, 1–13 (2021).
6. Choi, E. *et al.* Multi-layer representation learning for medical concepts. *Proceedings of the ACM SIGKDD International Conference on Knowledge Discovery and Data Mining 13-17-Aug*, 1495–1504 (2016).

- 1  
2  
3 7. Shemtob, L., Beaney, T., Norton, J. & Majeed, A. How can we improve the quality of  
4 data collected in general practice? *BMJ* **380**, e071950 (2023).  
5  
6
- 7  
8 8. Khan, N. F., Harrison, S. E. & Rose, P. W. Validity of diagnostic coding within the  
9  
10 General Practice Research Database: a systematic review. *British Journal of General*  
11  
12 *Practice* **60**, e128--e136 (2010).  
13
- 14  
15 9. Verheij, R. A., Curcin, V., Delaney, B. C. & McGilchrist, M. M. Possible Sources of Bias  
16  
17 in Primary Care Electronic Health Record Data Use and Reuse. *J Med Internet Res* **20**,  
18  
19 e185 (2018).  
20
- 21  
22 10. Bots, S. H., Groenwold, R. H. H. & Dekkers, O. M. Using electronic health record data  
23  
24 for clinical research: a quick guide. *European Journal of Endocrinology* **186**, E1–E6  
25  
26 (2022).  
27
- 28  
29 11. Beech, J. & Beccy Baird. GP funding and contracts explained. *The King's Fund*  
30  
31 <https://www.kingsfund.org.uk/publications/gp-funding-and-contracts-explained> (2020).  
32
- 33  
34 12. Forbes, L. J., Marchand, C., Doran, T. & Peckham, S. The role of the Quality and  
35  
36 Outcomes Framework in the care of long-term conditions: a systematic review. *Br J Gen*  
37  
38 *Pract* **67**, e775 (2017).  
39
- 40  
41 13. Minchin, M., Roland, M., Richardson, J., Rowark, S. & Guthrie, B. Quality of Care in the  
42  
43 United Kingdom after Removal of Financial Incentives. *New England Journal of*  
44  
45 *Medicine* **379**, 948–957 (2018).  
46
- 47  
48 14. Roland, M. & Guthrie, B. Quality and Outcomes Framework: what have we learnt? *BMJ*  
49  
50 **354**, i4060 (2016).  
51
- 52  
53 15. Wolf, A. *et al.* Data resource profile: Clinical Practice Research Datalink (CPRD)  
54  
55 *Aurum. International Journal of Epidemiology* **48**, 1740–1740g (2019).  
56
- 57  
58 16. Herrett, E. *et al.* Data Resource Profile: Clinical Practice Research Datalink (CPRD).  
59  
60 *International Journal of Epidemiology* **44**, 827–836 (2015).

17. Lewis, J. D., Bilker, W. B., Weinstein, R. B. & Strom, B. L. The relationship between time since registration and measured incidence rates in the General Practice Research Database. *Pharmacoepidemiology and Drug Safety* **14**, 443–451 (2005).
18. Ministry of Housing & Communities & Local Government. English indices of deprivation 2019. <https://www.gov.uk/government/statistics/english-indices-of-deprivation-2019>.
19. Mathur, R. *et al.* Completeness and usability of ethnicity data in UK-based primary care and hospital databases. *Journal of Public Health* **36**, 684–692 (2014).
20. Head, A. *et al.* Inequalities in incident and prevalent multimorbidity in England, 2004–2019: a population-based, descriptive study. *The Lancet Healthy Longevity* **2**, e489–e497 (2021).
21. Kuan, V. *et al.* A chronological map of 308 physical and mental health conditions from 4 million individuals in the English National Health Service. *The Lancet Digital Health* **1**, e63–e77 (2019).
22. Dean, C. B. Testing for Overdispersion in Poisson and Binomial Regression Models. *Journal of the American Statistical Association* **87**, 451–457 (1992).
23. Dunn, P. K. & Smyth, G. K. Randomized Quantile Residuals. *Journal of Computational and Graphical Statistics* **5**, 236–244 (1996).
24. Feng, C., Li, L. & Sadeghpour, A. A comparison of residual diagnosis tools for diagnosing regression models for count data. *BMC Med Res Methodol* **20**, 175 (2020).
25. Fisher, R., Dunn, P., Asaria, M. & Thorlby, R. Comparing general practice in areas of high and low socioeconomic deprivation in England. 30.
26. Ellis, D. A., McQueenie, R., McConnachie, A., Wilson, P. & Williamson, A. E. Demographic and practice factors predicting repeated non-attendance in primary care: a national retrospective cohort analysis. *The Lancet Public Health* **2**, e551–e559 (2017).

- 1  
2  
3 27. Gopfert, A., Deeny, S. R., Fisher, R. & Stafford, M. Primary care consultation length by  
4 deprivation and multimorbidity in England: an observational study using electronic  
5 patient records. *Br J Gen Pract* **71**, e185–e192 (2021).  
6  
7  
8  
9  
10 28. Jong, J. de, Groenewegen, P. & Westert, G. Medical practice variation: does it cluster  
11 within general practitioners' practices? in *Morbidity, Performance and Quality in*  
12 *Primary Care* (CRC Press, 2006).  
13  
14  
15  
16 29. Gluckman, P. D. Evolving a definition of disease. *Archives of Disease in Childhood* **92**,  
17 1053 (2007).  
18  
19  
20  
21 30. Majeed, A., Maile, E. J. & Bindman, A. B. The primary care response to COVID-19 in  
22 England's National Health Service. *J R Soc Med* **113**, 208–210 (2020).  
23  
24  
25  
26 31. Obermeyer, Z., Powers, B., Vogeli, C. & Mullainathan, S. Dissecting racial bias in an  
27 algorithm used to manage the health of populations. *Science* **366**, 447–453 (2019).  
28  
29  
30  
31 32. Jin, D., Jin, Z., Hu, Z., Vechtomova, O. & Mihalcea, R. Deep Learning for Text Style  
32 Transfer: A Survey. Preprint at <http://arxiv.org/abs/2011.00416> (2021).  
33  
34  
35 33. de Lusignan, S. *et al.* Problems with primary care data quality: osteoporosis as an  
36 exemplar. *Inform Prim Care* **12**, 147–156 (2004).  
37  
38  
39  
40 34. Rollason, W., Khunti, K. & de Lusignan, S. Variation in the recording of diabetes  
41 diagnostic data in primary care computer systems: implications for the quality of care.  
42 *Inform Prim Care* **17**, 113–119 (2009).  
43  
44  
45  
46  
47  
48  
49

50 Figure 1 legend:

51 Note: different ranges used in each axis  
52  
53  
54  
55

56 Figure 2 legend:  
57  
58  
59  
60

1  
2  
3 Note: Points represent estimates of the incidence rate ratio and bars represent 95% confidence  
4 intervals from negative binomial regression models. Corresponding values and coefficients  
5 for pre-existing QOF and non-QOF conditions are given in appendix Tables A5 and A6.  
6  
7  
8  
9  
10

11 Figure 3 legend:

12 Note: Points represent estimates of the incidence rate ratio and bars represent 95% confidence  
13 intervals from negative binomial regression models. Corresponding values and coefficients  
14 for pre-existing QOF and non-QOF conditions are given in appendix Tables A7 and A8.  
15  
16  
17  
18  
19  
20  
21  
22  
23  
24  
25  
26  
27  
28  
29  
30  
31  
32  
33  
34  
35  
36  
37  
38  
39  
40  
41  
42  
43  
44  
45  
46  
47  
48  
49  
50  
51  
52  
53  
54  
55  
56  
57  
58  
59  
60

# Scatterplot of yearly codes for QOF against non-QOF conditions

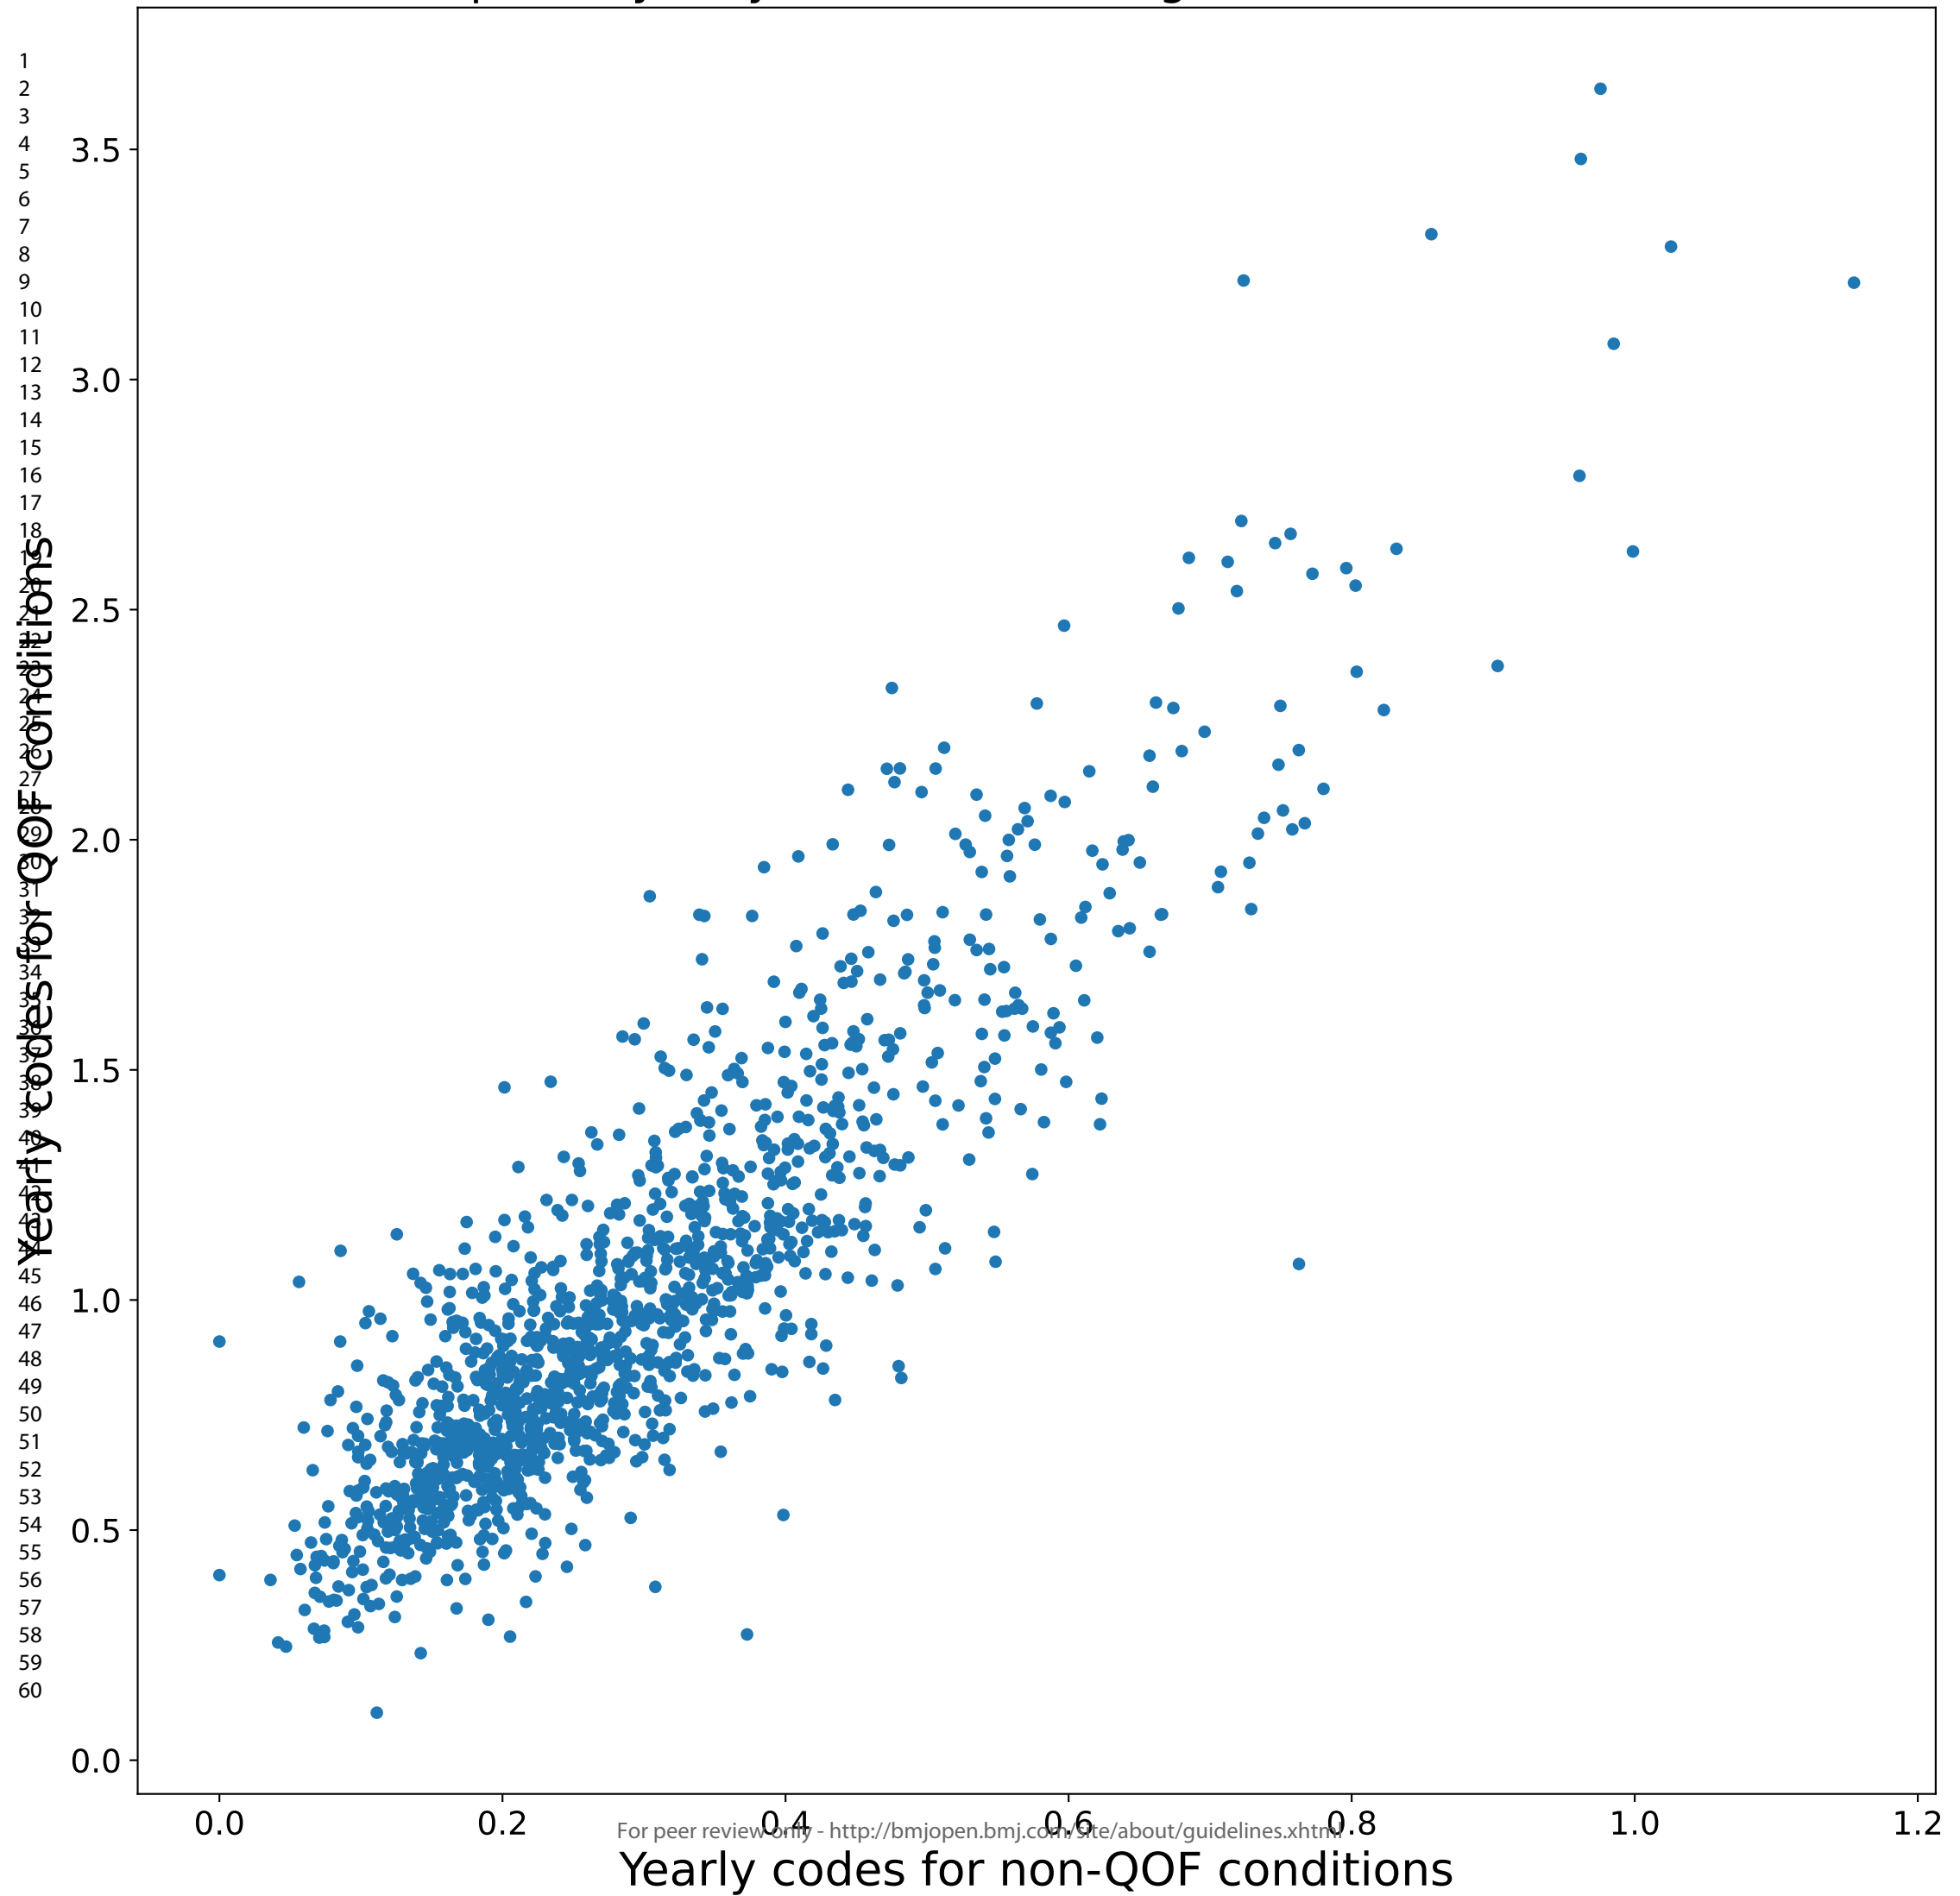



**Age category (years)**



1  
2  
3  
4  
5  
6  
7  
8  
9  
10  
11  
12  
13  
14  
15  
16  
17  
18  
19  
20  
21  
22  
23  
24  
25  
26  
27  
28  
29  
30  
31  
32  
33  
34  
35  
36  
37  
38  
39  
40  
41  
42  
43  
44  
45  
46  
47  
48  
49  
50  
51  
52  
53  
54  
55  
56  
57  
58  
59  
60

Under 40  
40-49  
50-59  
60-69 (reference)  
70-79  
80 or more  
**Sex**  
Female (reference)  
Male  
**Ethnicity category**  
White (reference)  
South Asian  
Black  
Other  
Mixed  
Missing  
**IMD decile**  
1 (most deprived)  
2  
3  
4  
5  
6  
7  
8  
9  
10 (least deprived)  
**Calendar year of diagnosis**  
2015 (reference)  
2016  
2017  
2018  
2019

0.6 0.8 1.0 1.2 1.4  
Incidence Rate Ratio

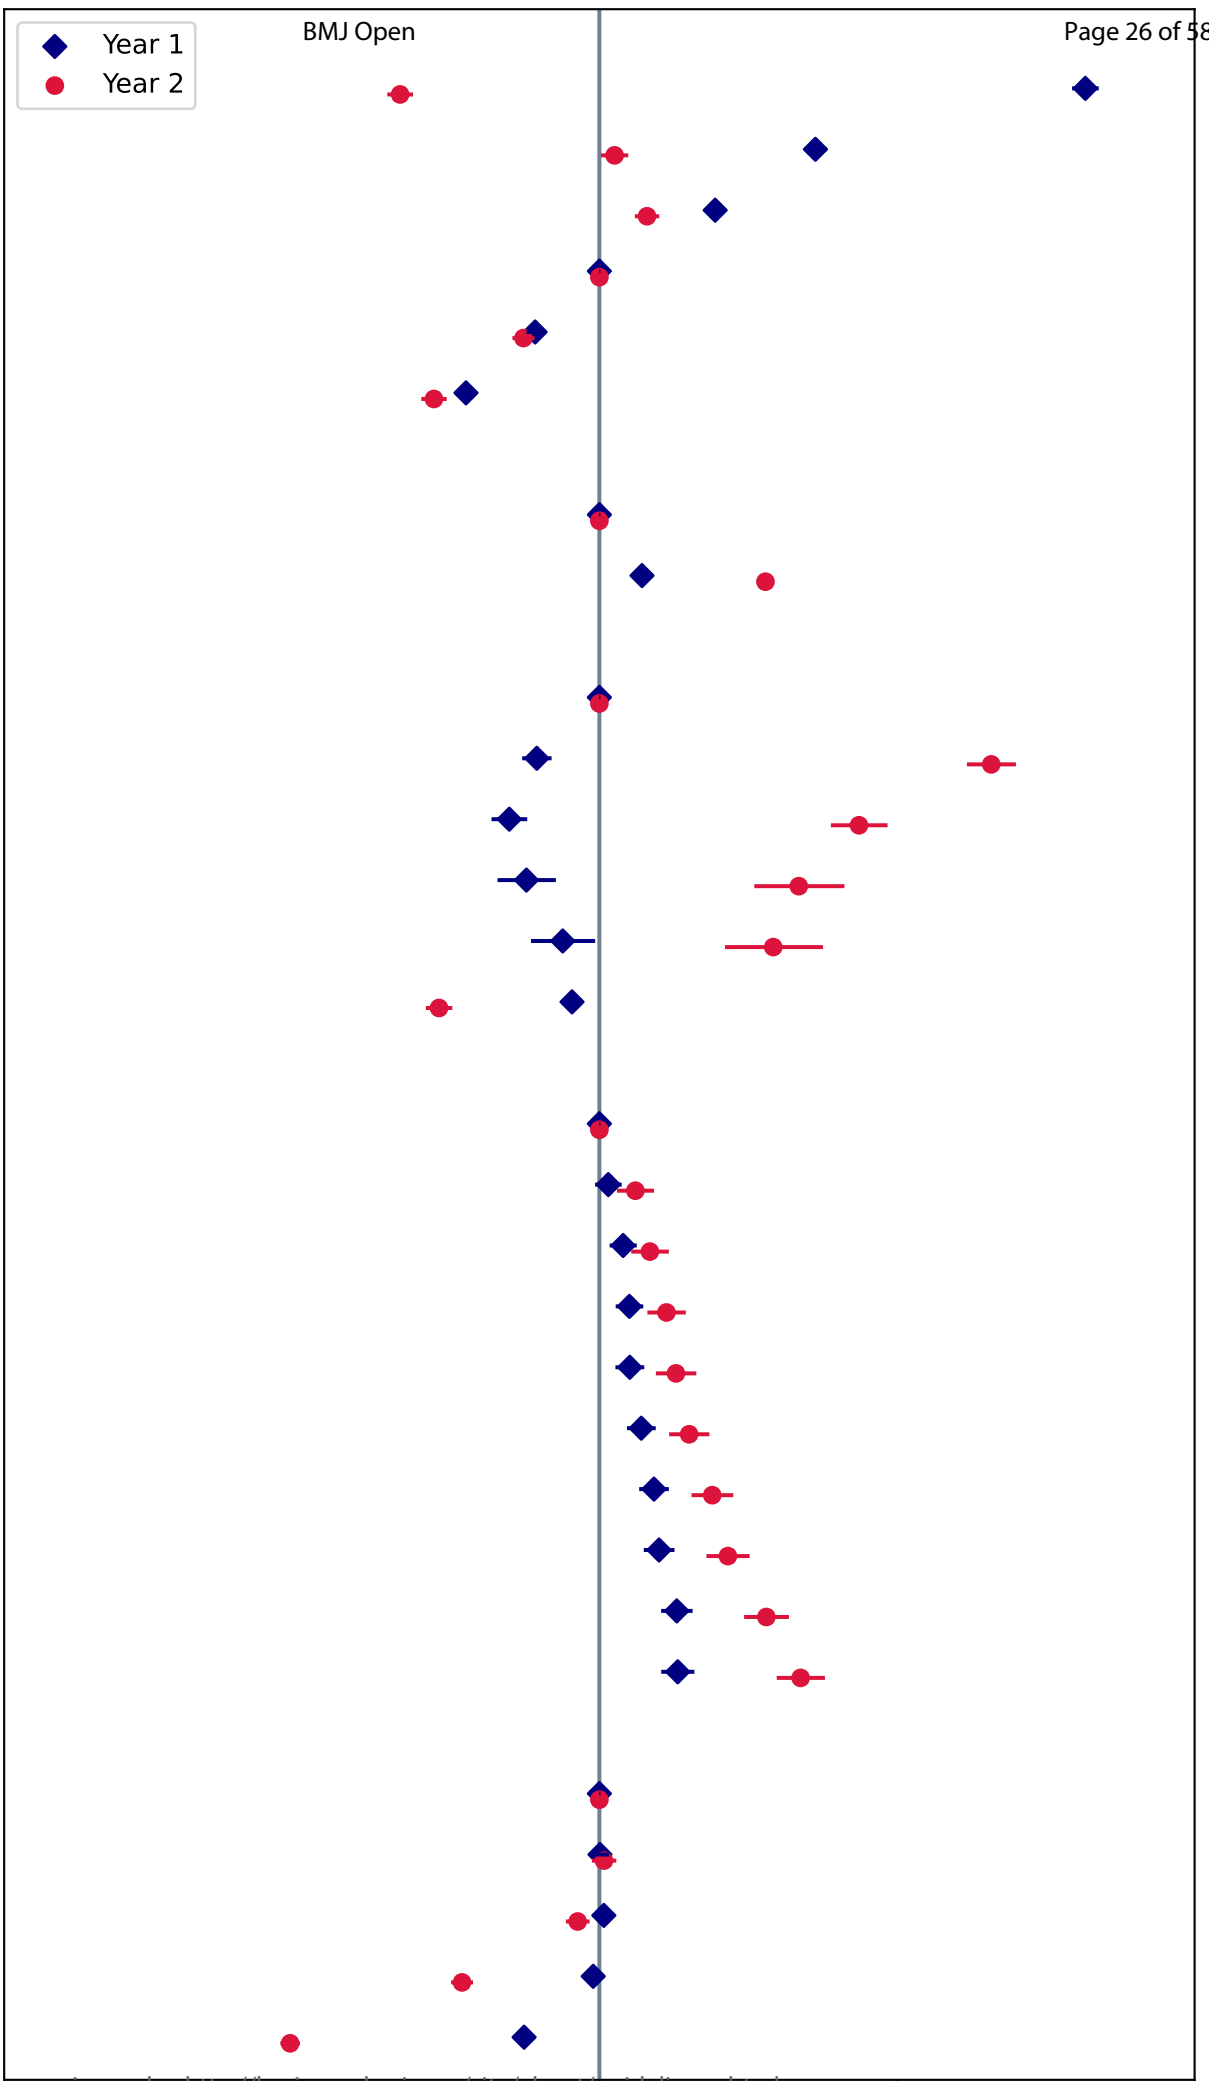

**Age category (years)**

1 Under 40

2 40-49

3

4 50-59

5

6 60-69 (reference)

7

8 70-79

9

10 80 or more

11 **Sex**

12

13 Female (reference)

14

15 Male

16

17 **Ethnicity category**

18

19 White (reference)

20

21 South Asian

22

23 Black

24

25 Other

26

27 Mixed

28

29 Missing

30

31 **IMD decile**

32

33 1 (most deprived)

34

35 2

36

37 3

38

39 4

40

41 5

42

43 6

44

45 7

46

47 8

48

49 9

50 10 (least deprived)

51 **Calendar year of diagnosis**

52

53 2015 (reference)

54

55 2016

56

57 2017

58

59 2018

60 2019



## Appendix

### Identifying potential biases in code sequences in primary care electronic healthcare records: a retrospective cohort study of the determinants of code frequency

Beaney T<sup>1,2</sup> (0000-0001-9709-7264), Clarke J<sup>2</sup>, Salman D<sup>1,3</sup>, Woodcock T<sup>1</sup>, Majeed A<sup>1</sup>, Barahona M<sup>2</sup>, Aylin P<sup>1</sup>

1. Department of Primary Care and Public Health, Imperial College London, London, W6 8RP, United Kingdom
2. Centre for Mathematics of Precision Healthcare, Department of Mathematics, Imperial College London, London, SW7 2AZ, United Kingdom
3. MSk Lab, Department of Surgery and Cancer, Faculty of Medicine, Imperial College London, London, UK

Corresponding Author:

Dr Thomas Beaney

Department of Primary Care and Public Health, Imperial College London, London, W6 8RP, United Kingdom

Email: [thomas.beaney@imperial.ac.uk](mailto:thomas.beaney@imperial.ac.uk)

1  
2  
3 Patients were included with continuous registration dates between 1<sup>st</sup> January 2014 and 31<sup>st</sup>  
4 December 2020. The 1<sup>st</sup> January 2014 was chosen to allow for a full one year of registration at  
5 a GP practice prior to follow-up, to reduce the potential impact of bias from newly registered  
6 patients having pre-existing conditions coded for the first time at their new practice. The end  
7 date of 31<sup>st</sup> December 2020 was chosen to provide at least one full year of follow-up for  
8 conditions newly diagnosed in 2019. Patients were followed up until the earliest date of death,  
9 deregistration and latest date of data extraction from their practice, if after 31<sup>st</sup> December 2020.  
10 The earliest possible censoring date for a patient was 1<sup>st</sup> January 2021 and the last date of  
11 follow-up for a patient was 21<sup>st</sup> March 2022.  
12  
13  
14  
15  
16  
17  
18  
19

### 20 Chronic conditions

21 Diseases were mapped using code lists developed for the CALIBER study, and adapted for use  
22 in multimorbidity in CPRD Aurum.<sup>1,2</sup> We reviewed the codes in these lists, and made  
23 amendments to the code lists for diabetes. The ‘other/unspecified’ diabetes code list contained  
24 codes specific to both Type 1 and Type 2 diabetes, and we removed these to ensure the list  
25 included only codes where a more specific Type 1 or Type 2 diagnosis was not stated. We  
26 added chronic primary pain to the set of included conditions and created a new code list.  
27 Previous studies of multimorbidity in primary care settings have found a high prevalence and  
28 burden of chronic pain.<sup>3,4</sup> However, in order to avoid double counting of pain related to another  
29 chronic condition included, we excluded secondary causes, and included only primary pain  
30 conditions.  
31  
32  
33  
34  
35  
36  
37  
38  
39

### 40 Assignment to QOF

41 Diseases were classified as included or not included in QOF by two clinicians with experience  
42 working as GPs: TB and DS. The first QOF year in 2004/2005 included eleven diseases, with  
43 new conditions added in subsequent years.<sup>5</sup> Rheumatoid arthritis was added to QOF in  
44 2013/2014, but there were no subsequent additions of any of the diseases included in this  
45 study.<sup>6</sup> However, hypothyroidism was included in QOF from its start until 2014/15 when it  
46 was removed.<sup>7</sup> The thyroid disease category from CALIBER included codes for both  
47 hypothyroidism and hyperthyroidism. We therefore excluded the thyroid disease category from  
48 comparisons of QOF to avoid any carry-over effect from prior inclusion in QOF, and dilution  
49 from non-hypothyroid conditions. The following QOF conditions from 2014/15 to 2019/20  
50 were included:  
51  
52  
53  
54  
55  
56  
57  
58  
59  
60

- 1
- 2
- 3 1. Coronary Heart Disease
- 4 2. Left Ventricular Dysfunction / Heart Failure (from 2006)
- 5 3. Stroke (and TIA from 2006)
- 6 4. Hypertension
- 7 5. Diabetes
- 8 6. COPD
- 9 7. Epilepsy
- 10 8. Cancer
- 11 9. Mental Health
- 12 10. Asthma
- 13 11. Dementia
- 14 12. Depression
- 15 13. CKD
- 16 14. Atrial fibrillation
- 17 15. Obesity
- 18 16. Learning disabilities
- 19 17. Palliative care
- 20 18. Smoking
- 21 19. Cardio-vascular disease (primary prevention)
- 22 20. Peripheral Arterial Disease (PAD)
- 23 21. Osteoporosis
- 24 22. Rheumatoid arthritis
- 25
- 26
- 27
- 28
- 29
- 30
- 31
- 32
- 33
- 34
- 35
- 36
- 37
- 38
- 39
- 40
- 41

42 For analyses of counts per calendar year, the total counts of disease codes were calculated for  
43 the first and second year from diagnosis. Counts were stratified according to whether a  
44 condition was included in QOF. A patient was included for a given calendar year if they had at  
45 least one QOF or non-QOF condition diagnosed in that year, as shown in Table A1.  
46  
47  
48  
49  
50  
51  
52  
53  
54  
55  
56  
57  
58  
59  
60

**Table A1: example of the stratification of condition and calendar year for each newly diagnosed condition for three hypothetical patients**

| Patient | Age | Condition | Calendar year | Count in year one | Count in year two |
|---------|-----|-----------|---------------|-------------------|-------------------|
| 1       | 67  | QOF       | 2015          | 0                 | 0                 |
| 1       | 68  | QOF       | 2016          | 2                 | 0                 |
| 1       | 70  | QOF       | 2018          | 4                 | 2                 |
| 1       | 67  | Non-QOF   | 2015          | 1                 | 1                 |
| 2       | 28  | Non-QOF   | 2019          | 1                 | 2                 |
| 3       | 52  | QOF       | 2017          | 5                 | 4                 |
| 3       | 52  | Non-QOF   | 2017          | 2                 | 2                 |

### Statistical analyses

Mixed effects negative binomial models were constructed. We considered use of a zero-inflated model, but coefficients from the logit and negative binomial components of the model were similar, and so in the interests of interpretable findings, the more parsimonious negative binomial model was selected.

Equation for the mixed effects negative binomial regression model, including fixed effects for calendar year and GP practice and random effects for patient:

$$\log(y_{i,j}) = \beta_0 + \beta_1 age_{i,j} + \beta_2 gender_{i,j} + \beta_3 ethnicity_{i,j} + \beta_4 IMD_{i,j} \\ + \beta_5 year_{i,j} + \beta_6 GP_{i,j} + u_j$$

where  $i$  represents QOF or non-QOF conditions newly diagnosed in patient  $j$  and  $y_{i,j}$  is the count of codes in the given year.

**A2: Frequency and percentage of pre-existing diseases (as of 1<sup>st</sup> January 2015) for all 3,113,724 eligible patients**

| <b>Pre-existing disease</b>                      | <b>Frequency</b> | <b>Percentage</b> |
|--------------------------------------------------|------------------|-------------------|
| Hypertension                                     | 751009           | 24.12%            |
| Enthesopathy and synovial disorder               | 736087           | 23.64%            |
| Dermatitis                                       | 710945           | 22.83%            |
| Depression                                       | 568871           | 18.27%            |
| Anxiety disorders                                | 507406           | 16.30%            |
| Allergic and chronic rhinitis                    | 477053           | 15.32%            |
| Asthma                                           | 456335           | 14.66%            |
| Osteoarthritis (excl spine)                      | 444668           | 14.28%            |
| Gastro-oesophageal reflux disease                | 301839           | 9.69%             |
| Obesity                                          | 294916           | 9.47%             |
| Diabetes Mellitus: other or not specified        | 285681           | 9.17%             |
| Hearing loss                                     | 279470           | 8.98%             |
| Migraine                                         | 270415           | 8.68%             |
| Type 2 Diabetes Mellitus                         | 255578           | 8.21%             |
| Irritable bowel syndrome                         | 246744           | 7.92%             |
| Abdominal Hernia                                 | 237968           | 7.64%             |
| Acne                                             | 225183           | 7.23%             |
| Chronic sinusitis                                | 212496           | 6.82%             |
| Thyroid Disease                                  | 204639           | 6.57%             |
| Spondylosis                                      | 181722           | 5.84%             |
| Gastritis and duodenitis                         | 181668           | 5.83%             |
| Cataract                                         | 160486           | 5.15%             |
| Chronic Kidney Disease                           | 158134           | 5.08%             |
| Coronary Heart Disease (not otherwise specified) | 144806           | 4.65%             |
| Seborrheic dermatitis                            | 143168           | 4.60%             |
| Urinary Incontinence                             | 137919           | 4.43%             |
| Alcohol Misuse                                   | 132717           | 4.26%             |
| Psoriasis                                        | 132694           | 4.26%             |
| Diaphragmatic hernia                             | 131539           | 4.22%             |
| Diverticular Disease                             | 131332           | 4.22%             |
| Tinnitus                                         | 123308           | 3.96%             |
| Gout                                             | 120568           | 3.87%             |
| Stable Angina                                    | 120309           | 3.86%             |
| Intervertebral disc disorders                    | 117787           | 3.78%             |
| Anaemia: other                                   | 116859           | 3.75%             |
| Diabetic Eye Disease                             | 102901           | 3.30%             |
| Rosacea                                          | 96511            | 3.10%             |
| Dysmenorrhoea                                    | 94881            | 3.05%             |



|    |                                         |       |       |
|----|-----------------------------------------|-------|-------|
| 1  |                                         |       |       |
| 2  |                                         |       |       |
| 3  | Benign Prostatic Hyperplasia            | 92304 | 2.96% |
| 4  | Osteoporosis                            | 91850 | 2.95% |
| 5  | Primary Malignancy: Skin                | 89500 | 2.87% |
| 6  | COPD                                    | 84482 | 2.71% |
| 7  | Atrial Fibrillation                     | 80645 | 2.59% |
| 8  | Peripheral Neuropathy                   | 77117 | 2.48% |
| 9  | Chronic Fatigue Syndrome                | 67489 | 2.17% |
| 10 | Myocardial Infarction                   | 67215 | 2.16% |
| 11 | Vitamin B12 deficiency anaemia          | 64015 | 2.06% |
| 12 | Glaucoma                                | 58081 | 1.87% |
| 13 | Epilepsy                                | 53058 | 1.70% |
| 14 | Stroke: not otherwise specified         | 50614 | 1.63% |
| 15 | Substance Misuse                        | 50251 | 1.61% |
| 16 | Primary Malignancy: Breast              | 49737 | 1.60% |
| 17 | Venous thromboembolic disease (Excl PE) | 47013 | 1.51% |
| 18 | Transient ischaemic attack              | 44616 | 1.43% |
| 19 | Fibromatosis                            | 42701 | 1.37% |
| 20 | Neuropathic Bladder                     | 42008 | 1.35% |
| 21 | Raynaud's syndrome                      | 38879 | 1.25% |
| 22 | Endometriosis                           | 37868 | 1.22% |
| 23 | Sleep apnoea                            | 35743 | 1.15% |
| 24 | Heart failure                           | 35364 | 1.14% |
| 25 | Peripheral Vascular Disease             | 32852 | 1.06% |
| 26 | Rheumatoid Arthritis                    | 32070 | 1.03% |
| 27 | Macular degeneration                    | 30761 | 0.99% |
| 28 | Chronic primary pain                    | 29506 | 0.95% |
| 29 | Anterior and Intermediate Uveitis       | 28838 | 0.93% |
| 30 | Visual impairment and blindness         | 28372 | 0.91% |
| 31 | Polymyalgia Rheumatica                  | 27447 | 0.88% |
| 32 | Primary Malignancy: Prostate            | 26288 | 0.84% |
| 33 | Ulcerative colitis                      | 22236 | 0.71% |
| 34 | Nonrheumatic mitral valve disorders     | 20980 | 0.67% |
| 35 | Spinal stenosis                         | 20820 | 0.67% |
| 36 | Nonrheumatic aortic valve disorders     | 20695 | 0.66% |
| 37 | Schizophrenia                           | 20394 | 0.65% |
| 38 | Type 1 Diabetes Mellitus                | 19978 | 0.64% |
| 39 | Unstable Angina                         | 18925 | 0.61% |
| 40 | Trigeminal neuralgia                    | 18854 | 0.61% |
| 41 | Scleritis and episcleritis              | 18830 | 0.60% |
| 42 | Fatty Liver                             | 18774 | 0.60% |
| 43 | Barrett's oesophagus                    | 18152 | 0.58% |
| 44 | Supraventricular tachycardia            | 18128 | 0.58% |
| 45 | Intellectual disability                 | 18073 | 0.58% |
| 46 | Pancreatitis                            | 18043 | 0.58% |
| 47 |                                         |       |       |
| 48 |                                         |       |       |
| 49 |                                         |       |       |
| 50 |                                         |       |       |
| 51 |                                         |       |       |
| 52 |                                         |       |       |
| 53 |                                         |       |       |
| 54 |                                         |       |       |
| 55 |                                         |       |       |
| 56 |                                         |       |       |
| 57 |                                         |       |       |
| 58 |                                         |       |       |
| 59 |                                         |       |       |
| 60 |                                         |       |       |

|    |                                        |       |       |
|----|----------------------------------------|-------|-------|
| 1  |                                        |       |       |
| 2  |                                        |       |       |
| 3  | Bronchiectasis                         | 18006 | 0.58% |
| 4  | Primary Malignancy: Melanoma           | 17594 | 0.57% |
| 5  | Personality disorders                  | 17448 | 0.56% |
| 6  | Alopecia areata                        | 17111 | 0.55% |
| 7  | Primary Malignancy: Bowel              | 16746 | 0.54% |
| 8  | Obsessive-compulsive disorder          | 15553 | 0.50% |
| 9  | Polycystic ovarian syndrome            | 14606 | 0.47% |
| 10 | Crohn's disease                        | 14445 | 0.46% |
| 11 | Folate deficiency anaemia              | 13853 | 0.44% |
| 12 | Retinal vascular occlusions            | 13829 | 0.44% |
| 13 | Obstructive and reflux uropathy        | 13725 | 0.44% |
| 14 | Ischaemic stroke                       | 13451 | 0.43% |
| 15 | Hidradenitis suppurativa               | 13305 | 0.43% |
| 16 | Vitiligo                               | 13218 | 0.42% |
| 17 | Meniere's Disease                      | 13192 | 0.42% |
| 18 | Bipolar affective disorder and mania   | 12856 | 0.41% |
| 19 | Coeliac disease                        | 12625 | 0.41% |
| 20 | Diabetic Neuropathy                    | 12517 | 0.40% |
| 21 | Chronic viral hepatitis                | 11885 | 0.38% |
| 22 | Thrombophilia                          | 11527 | 0.37% |
| 23 | Psoriatic Arthritis                    | 11201 | 0.36% |
| 24 | Eating Disorders                       | 11171 | 0.36% |
| 25 | Dementia                               | 10297 | 0.33% |
| 26 | Spondylolisthesis                      | 10229 | 0.33% |
| 27 | Secondary Thrombocytopaenia            | 9800  | 0.31% |
| 28 | Congenital Septal Defect               | 9203  | 0.30% |
| 29 | Sarcoidosis                            | 9090  | 0.29% |
| 30 | Multiple sclerosis                     | 9070  | 0.29% |
| 31 | Benign essential tremor                | 9008  | 0.29% |
| 32 | Right bundle branch block combinations | 8160  | 0.26% |
| 33 | Primary Malignancy: Bladder            | 8066  | 0.26% |
| 34 | Primary Malignancy: other              | 8021  | 0.26% |
| 35 | Glomerulonephritis                     | 7950  | 0.26% |
| 36 | Autism and Asperger's syndrome         | 7920  | 0.25% |
| 37 | Non-Hodgkin Lymphoma                   | 7579  | 0.24% |
| 38 | Hyperparathyroidism                    | 7437  | 0.24% |
| 39 | Pleural effusion                       | 7368  | 0.24% |
| 40 | Hyperkinetic disorders                 | 7056  | 0.23% |
| 41 | Ankylosing spondylitis                 | 7044  | 0.23% |
| 42 | Lupus Erythematosus                    | 6976  | 0.22% |
| 43 | Cirrhosis                              | 6768  | 0.22% |
| 44 | Alcoholic liver disease                | 6621  | 0.21% |
| 45 | Left bundle branch block               | 6512  | 0.21% |
| 46 | Subarachnoid haemorrhage               | 6158  | 0.20% |
| 47 |                                        |       |       |
| 48 |                                        |       |       |
| 49 |                                        |       |       |
| 50 |                                        |       |       |
| 51 |                                        |       |       |
| 52 |                                        |       |       |
| 53 |                                        |       |       |
| 54 |                                        |       |       |
| 55 |                                        |       |       |
| 56 |                                        |       |       |
| 57 |                                        |       |       |
| 58 |                                        |       |       |
| 59 |                                        |       |       |
| 60 |                                        |       |       |

|    |                                         |      |       |
|----|-----------------------------------------|------|-------|
| 1  |                                         |      |       |
| 2  |                                         |      |       |
| 3  | Collapsed vertebra                      | 6082 | 0.20% |
| 4  | Autonomic Neuropathy                    | 5496 | 0.18% |
| 5  | Cardiomyopathy: other                   | 5465 | 0.18% |
| 6  | Parkinson's disease                     | 5333 | 0.17% |
| 7  | Leukaemia                               | 5243 | 0.17% |
| 8  | Giant Cell arteritis                    | 5225 | 0.17% |
| 9  | Hyposplenism                            | 4737 | 0.15% |
| 10 | HIV                                     | 4697 | 0.15% |
| 11 | Endometrial hyperplasia and hypertrophy | 4655 | 0.15% |
| 12 | Primary Malignancy: Uterus              | 4589 | 0.15% |
| 13 | Sjogren's Syndrome                      | 4559 | 0.15% |
| 14 | Spina bifida                            | 4427 | 0.14% |
| 15 | Cerebral Palsy                          | 4011 | 0.13% |
| 16 | Primary Thrombocytopaenia               | 3979 | 0.13% |
| 17 | Pleural plaque                          | 3972 | 0.13% |
| 18 | Abdominal Aortic Aneurysm               | 3931 | 0.13% |
| 19 | Atrioventricular blocks                 | 3920 | 0.13% |
| 20 | Chronic Cystitis                        | 3892 | 0.12% |
| 21 | Intracerebral haemorrhage               | 3815 | 0.12% |
| 22 | Primary Malignancy: Ovary               | 3689 | 0.12% |
| 23 | Primary Malignancy: Cervix              | 3500 | 0.11% |
| 24 | Asbestosis                              | 3358 | 0.11% |
| 25 | Other haemolytic anaemias               | 3152 | 0.10% |
| 26 | Primary Malignancy: Testis              | 3133 | 0.10% |
| 27 | Thalassaemia                            | 3055 | 0.10% |
| 28 | Hypertrophic Nasal Turbinates           | 3022 | 0.10% |
| 29 | Primary Malignancy: Kidney              | 2988 | 0.10% |
| 30 | Polycythaemia vera                      | 2864 | 0.09% |
| 31 | Primary Malignancy: Oropharyngeal       | 2809 | 0.09% |
| 32 | Autoimmune liver disease                | 2792 | 0.09% |
| 33 | Ventricular tachycardia                 | 2720 | 0.09% |
| 34 | Secondary polycythaemia                 | 2625 | 0.08% |
| 35 | Posterior Uveitis                       | 2540 | 0.08% |
| 36 | Pulmonary Fibrosis                      | 2523 | 0.08% |
| 37 | Hodgkin Lymphoma                        | 2384 | 0.08% |
| 38 | Hypersplenism                           | 2362 | 0.08% |
| 39 | Dilated cardiomyopathy                  | 2359 | 0.08% |
| 40 | Primary Malignancy: Lung                | 2244 | 0.07% |
| 41 | Primary Malignancy: Thyroid             | 2172 | 0.07% |
| 42 | Rheumatic Valve Disorder                | 2034 | 0.07% |
| 43 | Secondary Malignancy_other              | 1975 | 0.06% |
| 44 | Down's syndrome                         | 1928 | 0.06% |
| 45 | Multiple valve disorder                 | 1834 | 0.06% |
| 46 | Idiopathic Intracranial Hypertension    | 1823 | 0.06% |
| 47 |                                         |      |       |
| 48 |                                         |      |       |
| 49 |                                         |      |       |
| 50 |                                         |      |       |
| 51 |                                         |      |       |
| 52 |                                         |      |       |
| 53 |                                         |      |       |
| 54 |                                         |      |       |
| 55 |                                         |      |       |
| 56 |                                         |      |       |
| 57 |                                         |      |       |
| 58 |                                         |      |       |
| 59 |                                         |      |       |
| 60 |                                         |      |       |

|    |                                     |      |        |
|----|-------------------------------------|------|--------|
| 1  |                                     |      |        |
| 2  |                                     |      |        |
| 3  | Hypertrophic Cardiomyopathy         | 1779 | 0.06%  |
| 4  | Oesophageal varices                 | 1716 | 0.06%  |
| 5  | Plasma Cell Malignancy              | 1610 | 0.05%  |
| 6  | Scleroderma                         | 1566 | 0.05%  |
| 7  | Pericardial Effusion                | 1509 | 0.05%  |
| 8  | Myasthenia gravis                   | 1407 | 0.05%  |
| 9  | Primary pulmonary hypertension      | 1345 | 0.04%  |
| 10 | Sick sinus syndrome                 | 1231 | 0.04%  |
| 11 | Aplastic anaemias                   | 1172 | 0.04%  |
| 12 | Primary Malignancy: Brain           | 1131 | 0.04%  |
| 13 | Immunodeficiencies                  | 1071 | 0.03%  |
| 14 | Cystic Fibrosis                     | 985  | 0.03%  |
| 15 | Primary Malignancy: Oesophageal     | 955  | 0.03%  |
| 16 | Myelodysplastic Syndrome            | 927  | 0.03%  |
| 17 | Portal hypertension                 | 919  | 0.03%  |
| 18 | Sickle Cell Disease                 | 887  | 0.03%  |
| 19 | Secondary pulmonary hypertension    | 824  | 0.03%  |
| 20 | Angiodysplasia of colon             | 777  | 0.02%  |
| 21 | Primary Malignancy: Bone            | 741  | 0.02%  |
| 22 | Primary Malignancy: Stomach         | 694  | 0.02%  |
| 23 | Hepatic failure                     | 632  | 0.02%  |
| 24 | Secondary Malignancy: Lymph Nodes   | 565  | 0.02%  |
| 25 | Secondary Malignancy: Liver         | 491  | 0.02%  |
| 26 | Tubulo-interstitial nephritis       | 365  | 0.01%  |
| 27 | Motor neurone disease               | 347  | 0.01%  |
| 28 | Primary Malignancy: Pancreas        | 302  | 0.01%  |
| 29 | Enteropathic arthropathy            | 291  | 0.01%  |
| 30 | Primary Malignancy: Liver           | 233  | 0.01%  |
| 31 | Secondary Malignancy: Lung          | 223  | 0.01%  |
| 32 | Secondary Malignancy: Bone          | 187  | 0.01%  |
| 33 | Primary Malignancy: Biliary Tract   | 129  | <0.01% |
| 34 | Secondary Malignancy: Brain         | 50   | <0.01% |
| 35 | Secondary Malignancy: Peritoneum    | 24   | <0.01% |
| 36 | Secondary Malignancy: Bowel         | 11   | <0.01% |
| 37 | Secondary Malignancy: Adrenal Gland | *    | <0.01% |
| 38 | Primary Malignancy: Multiple Sites  | *    | <0.01% |
| 39 | Primary Malignancy: Mesothelioma    | *    | <0.01% |
| 40 | Secondary Malignancy: Pleura        | *    | <0.01% |
| 41 |                                     |      |        |
| 42 |                                     |      |        |
| 43 |                                     |      |        |
| 44 |                                     |      |        |
| 45 |                                     |      |        |
| 46 |                                     |      |        |
| 47 |                                     |      |        |
| 48 |                                     |      |        |
| 49 |                                     |      |        |
| 50 |                                     |      |        |
| 51 |                                     |      |        |
| 52 |                                     |      |        |
| 53 |                                     |      |        |
| 54 |                                     |      |        |
| 55 |                                     |      |        |
| 56 |                                     |      |        |
| 57 |                                     |      |        |
| 58 |                                     |      |        |
| 59 |                                     |      |        |
| 60 |                                     |      |        |

\* diseases with frequency <10 suppressed as small counts

**Table A3: characteristics of the 3,060,391 ineligible patients with no incident diseases over the study period**

| <b>Patient characteristic</b> | <b>Total</b>   | <b>Percent</b> |
|-------------------------------|----------------|----------------|
| <b>Age (years)</b>            |                |                |
| 18-40                         | 1476341        | 48.2%          |
| 40-49                         | 689779         | 22.5%          |
| 50-59                         | 435517         | 14.2%          |
| 60-69                         | 291093         | 9.5%           |
| 70-79                         | 129375         | 4.2%           |
| 80+                           | 38286          | 1.3%           |
| <b>Gender</b>                 |                |                |
| Female                        | 1357049        | 44.3%          |
| Male                          | 1703284        | 55.7%          |
| Indeterminate                 | 58             | 0.0%           |
| <b>Total</b>                  | <b>3060391</b> |                |

**Table A4: distribution of yearly codes over the whole follow-up period for each condition, ordered by median**

| Disease                                          | 5 <sup>th</sup> centile | Median | 95 <sup>th</sup> centile | Mean | Standard deviation |
|--------------------------------------------------|-------------------------|--------|--------------------------|------|--------------------|
| Diabetes Mellitus_other or not specified         | 0.00                    | 2.99   | 6.88                     | 3.08 | 2.22               |
| Polymyalgia Rheumatica                           | 0.00                    | 1.05   | 6.32                     | 1.82 | 2.29               |
| Motor neurone disease                            | 0.00                    | 0.95   | 12.15                    | 2.86 | 5.41               |
| Dementia                                         | 0.00                    | 0.93   | 4.36                     | 1.39 | 1.80               |
| Type 2 Diabetes Mellitus                         | 0.00                    | 0.89   | 4.59                     | 1.41 | 1.73               |
| Type 1 Diabetes Mellitus                         | 0.00                    | 0.88   | 6.31                     | 1.71 | 2.41               |
| Depression                                       | 0.00                    | 0.83   | 4.54                     | 1.36 | 1.76               |
| COPD                                             | 0.00                    | 0.77   | 3.77                     | 1.17 | 1.43               |
| Heart failure                                    | 0.00                    | 0.73   | 5.48                     | 1.46 | 2.21               |
| Rheumatoid Arthritis                             | 0.00                    | 0.70   | 5.50                     | 1.43 | 2.23               |
| Primary Malignancy_Mesothelioma                  | 0.00                    | 0.67   | 9.16                     | 1.78 | 3.18               |
| Primary Malignancy_Pancreas                      | 0.00                    | 0.67   | 13.41                    | 2.63 | 5.12               |
| Primary Malignancy_Brain                         | 0.00                    | 0.66   | 10.60                    | 2.15 | 3.96               |
| Primary Malignancy_Oesophageal                   | 0.00                    | 0.64   | 10.86                    | 2.44 | 4.95               |
| Myasthenia gravis                                | 0.00                    | 0.62   | 5.61                     | 1.48 | 2.66               |
| Multiple sclerosis                               | 0.00                    | 0.59   | 5.63                     | 1.40 | 2.41               |
| Parkinson's disease                              | 0.00                    | 0.59   | 4.52                     | 1.20 | 1.77               |
| Vitamin B12 deficiency anaemia                   | 0.00                    | 0.56   | 4.60                     | 1.24 | 1.67               |
| Bipolar affective disorder and mania             | 0.00                    | 0.56   | 4.99                     | 1.30 | 2.15               |
| Plasma Cell Malignancy                           | 0.00                    | 0.54   | 10.32                    | 2.15 | 4.67               |
| Hypertension                                     | 0.00                    | 0.54   | 2.95                     | 0.88 | 1.12               |
| Atrial Fibrillation                              | 0.00                    | 0.51   | 3.47                     | 0.97 | 1.47               |
| Primary Malignancy_Prostate                      | 0.00                    | 0.51   | 6.11                     | 1.46 | 2.48               |
| Intellectual disability                          | 0.00                    | 0.49   | 5.19                     | 1.47 | 1.91               |
| Primary Malignancy_Lung                          | 0.00                    | 0.45   | 8.17                     | 1.73 | 3.55               |
| Primary Malignancy_Biliary Tract                 | 0.00                    | 0.45   | 8.96                     | 1.89 | 4.73               |
| Giant Cell arteritis                             | 0.00                    | 0.44   | 5.73                     | 1.36 | 2.47               |
| Crohn's disease                                  | 0.00                    | 0.42   | 5.41                     | 1.24 | 2.32               |
| Primary Malignancy_Breast                        | 0.00                    | 0.39   | 5.25                     | 1.21 | 2.47               |
| Hodgkin Lymphoma                                 | 0.00                    | 0.38   | 5.41                     | 1.24 | 2.55               |
| Ulcerative colitis                               | 0.00                    | 0.38   | 4.27                     | 1.00 | 1.87               |
| Primary Malignancy_Oropharyngeal                 | 0.00                    | 0.37   | 6.84                     | 1.44 | 2.95               |
| Non-Hodgkin Lymphoma                             | 0.00                    | 0.37   | 5.52                     | 1.22 | 2.53               |
| Leukaemia                                        | 0.00                    | 0.37   | 5.19                     | 1.17 | 2.58               |
| Secondary Malignancy_Brain                       | 0.00                    | 0.37   | 7.68                     | 1.45 | 2.74               |
| Stroke_not otherwise specified                   | 0.00                    | 0.34   | 2.11                     | 0.59 | 0.89               |
| Idiopathic Intracranial Hypertension             | 0.00                    | 0.34   | 3.81                     | 0.92 | 1.76               |
| Thyroid Disease                                  | 0.00                    | 0.33   | 2.56                     | 0.68 | 1.16               |
| Asthma                                           | 0.00                    | 0.32   | 2.33                     | 0.63 | 0.99               |
| Primary Malignancy_Stomach                       | 0.00                    | 0.32   | 6.93                     | 1.45 | 3.30               |
| Chronic primary pain                             | 0.00                    | 0.32   | 3.23                     | 0.79 | 1.34               |
| Coronary Heart Disease (not otherwise specified) | 0.00                    | 0.31   | 2.02                     | 0.56 | 0.85               |
| Epilepsy                                         | 0.00                    | 0.31   | 3.66                     | 0.92 | 1.95               |
| Psoriatic Arthritis                              | 0.00                    | 0.30   | 3.68                     | 0.87 | 1.63               |

|    |                                   |      |      |      |      |      |
|----|-----------------------------------|------|------|------|------|------|
| 1  |                                   |      |      |      |      |      |
| 2  |                                   |      |      |      |      |      |
| 3  | Chronic Fatigue Syndrome          | 0.00 | 0.29 | 3.22 | 0.76 | 1.31 |
| 4  | Primary Malignancy_Bowel          | 0.00 | 0.29 | 5.25 | 1.15 | 2.88 |
| 5  | Anxiety disorders                 | 0.00 | 0.29 | 2.99 | 0.73 | 1.29 |
| 6  |                                   |      |      |      |      |      |
| 7  | Primary Malignancy_Thyroid        | 0.00 | 0.28 | 4.05 | 0.88 | 1.76 |
| 8  | Personality disorders             | 0.00 | 0.28 | 4.35 | 0.99 | 2.05 |
| 9  | Schizophrenia                     | 0.00 | 0.27 | 3.36 | 0.78 | 1.52 |
| 10 | Primary Malignancy_Cervix         | 0.00 | 0.27 | 5.26 | 1.17 | 2.77 |
| 11 | Autoimmune liver disease          | 0.00 | 0.26 | 3.63 | 0.85 | 1.82 |
| 12 | Myelodysplastic Syndrome          | 0.00 | 0.26 | 4.88 | 1.15 | 2.95 |
| 13 |                                   |      |      |      |      |      |
| 14 | Bronchiectasis                    | 0.00 | 0.24 | 3.03 | 0.70 | 1.31 |
| 15 | Hyperkinetic disorders            | 0.00 | 0.24 | 3.11 | 0.72 | 1.34 |
| 16 | Primary Malignancy_Ovary          | 0.00 | 0.24 | 6.15 | 1.24 | 2.87 |
| 17 | Primary Malignancy_Liver          | 0.00 | 0.23 | 3.64 | 0.95 | 2.99 |
| 18 | Coeliac disease                   | 0.00 | 0.23 | 2.13 | 0.52 | 0.85 |
| 19 | Lupus Erythematosus               | 0.00 | 0.22 | 3.52 | 0.83 | 1.87 |
| 20 |                                   |      |      |      |      |      |
| 21 | Myocardial Infarction             | 0.00 | 0.21 | 2.44 | 0.58 | 1.04 |
| 22 | Primary Malignancy_Bone           | 0.00 | 0.21 | 4.03 | 0.97 | 3.29 |
| 23 | Secondary Malignancy_other        | 0.00 | 0.21 | 5.92 | 1.18 | 2.65 |
| 24 | Peripheral Vascular Disease       | 0.00 | 0.20 | 2.73 | 0.75 | 2.53 |
| 25 | Ankylosing spondylitis            | 0.00 | 0.20 | 3.00 | 0.69 | 1.47 |
| 26 | Primary Malignancy_Bladder        | 0.00 | 0.20 | 4.38 | 0.90 | 2.05 |
| 27 | Primary Malignancy_Testis         | 0.00 | 0.20 | 3.58 | 0.81 | 1.50 |
| 28 |                                   |      |      |      |      |      |
| 29 | Sarcoidosis                       | 0.00 | 0.19 | 3.36 | 0.72 | 1.53 |
| 30 | Abdominal Hernia                  | 0.00 | 0.19 | 1.55 | 0.40 | 0.68 |
| 31 | Secondary Malignancy_Peritoneum   | 0.00 | 0.19 | 4.21 | 1.30 | 3.31 |
| 32 | Scleroderma                       | 0.00 | 0.19 | 3.00 | 0.71 | 1.88 |
| 33 |                                   |      |      |      |      |      |
| 34 | Primary Malignancy_Melanoma       | 0.00 | 0.18 | 3.06 | 0.67 | 1.71 |
| 35 | Gout                              | 0.00 | 0.17 | 1.74 | 0.43 | 0.73 |
| 36 | Barrett's oesophagus              | 0.00 | 0.16 | 1.40 | 0.35 | 0.57 |
| 37 | Glomerulonephritis                | 0.00 | 0.16 | 3.26 | 0.74 | 1.69 |
| 38 | Osteoporosis                      | 0.00 | 0.15 | 1.52 | 0.38 | 0.65 |
| 39 | Primary Malignancy_Uterus         | 0.00 | 0.15 | 3.90 | 0.81 | 2.16 |
| 40 | Cirrhosis                         | 0.00 | 0.15 | 2.88 | 0.63 | 1.40 |
| 41 |                                   |      |      |      |      |      |
| 42 | Diabetic Eye Disease              | 0.00 | 0.15 | 1.61 | 0.40 | 0.68 |
| 43 | Intracerebral haemorrhage         | 0.00 | 0.15 | 2.58 | 0.56 | 1.10 |
| 44 | Primary Malignancy_Kidney         | 0.00 | 0.14 | 2.93 | 0.66 | 1.67 |
| 45 | Dilated cardiomyopathy            | 0.00 | 0.14 | 1.99 | 0.46 | 0.93 |
| 46 | Eating Disorders                  | 0.00 | 0.14 | 4.03 | 0.84 | 2.38 |
| 47 |                                   |      |      |      |      |      |
| 48 | Abdominal Aortic Aneurysm         | 0.00 | 0.00 | 1.35 | 0.26 | 0.58 |
| 49 | Acne                              | 0.00 | 0.00 | 1.26 | 0.30 | 0.50 |
| 50 | Alcohol Misuse                    | 0.00 | 0.00 | 0.94 | 0.20 | 0.66 |
| 51 | Alcoholic liver disease           | 0.00 | 0.00 | 1.90 | 0.42 | 1.09 |
| 52 | Allergic and chronic rhinitis     | 0.00 | 0.00 | 0.56 | 0.10 | 0.27 |
| 53 | Alopecia areata                   | 0.00 | 0.00 | 0.87 | 0.17 | 0.45 |
| 54 | Anaemia_other                     | 0.00 | 0.00 | 1.49 | 0.33 | 0.78 |
| 55 |                                   |      |      |      |      |      |
| 56 | Angiodysplasia of colon           | 0.00 | 0.00 | 0.87 | 0.17 | 0.49 |
| 57 | Anterior and Intermediate Uveitis | 0.00 | 0.00 | 1.18 | 0.25 | 0.66 |
| 58 | Aplastic anaemias                 | 0.00 | 0.00 | 2.19 | 0.47 | 1.42 |
| 59 | Asbestosis                        | 0.00 | 0.00 | 0.96 | 0.20 | 0.65 |
| 60 | Atrioventricular blocks           | 0.00 | 0.00 | 0.64 | 0.11 | 0.33 |



1  
2  
3  
4  
5  
6  
7  
8  
9  
10  
11  
12  
13  
14  
15  
16  
17  
18  
19  
20  
21  
22  
23  
24  
25  
26  
27  
28  
29  
30  
31  
32  
33  
34  
35  
36  
37  
38  
39  
40  
41  
42  
43  
44  
45  
46  
47  
48  
49  
50  
51  
52  
53  
54  
55  
56  
57  
58  
59  
60

|                                         |      |      |      |      |      |
|-----------------------------------------|------|------|------|------|------|
| Autism and Asperger's syndrome          | 0.00 | 0.00 | 1.10 | 0.25 | 0.58 |
| Autonomic Neuropathy                    | 0.00 | 0.00 | 2.46 | 0.47 | 1.34 |
| Benign Prostatic Hyperplasia            | 0.00 | 0.00 | 1.08 | 0.25 | 0.50 |
| Benign essential tremor                 | 0.00 | 0.00 | 1.11 | 0.22 | 0.53 |
| Cardiomyopathy_other                    | 0.00 | 0.00 | 1.94 | 0.41 | 0.90 |
| Cataract                                | 0.00 | 0.00 | 1.16 | 0.27 | 0.50 |
| Cerebral Palsy                          | 0.00 | 0.00 | 0.73 | 0.16 | 0.48 |
| Chronic Cystitis                        | 0.00 | 0.00 | 1.88 | 0.37 | 1.03 |
| Chronic Kidney Disease                  | 0.00 | 0.00 | 1.16 | 0.26 | 0.65 |
| Chronic sinusitis                       | 0.00 | 0.00 | 0.72 | 0.13 | 0.39 |
| Chronic viral hepatitis                 | 0.00 | 0.00 | 1.89 | 0.40 | 0.90 |
| Collapsed vertebra                      | 0.00 | 0.00 | 1.64 | 0.34 | 0.77 |
| Congenital Septal Defect                | 0.00 | 0.00 | 1.21 | 0.24 | 0.62 |
| Cystic Fibrosis                         | 0.00 | 0.00 | 2.21 | 0.31 | 1.00 |
| Dermatitis                              | 0.00 | 0.00 | 0.76 | 0.15 | 0.43 |
| Diabetic Neuropathy                     | 0.00 | 0.00 | 1.62 | 0.38 | 1.44 |
| Diaphragmatic hernia                    | 0.00 | 0.00 | 0.81 | 0.17 | 0.38 |
| Diverticular Disease                    | 0.00 | 0.00 | 0.96 | 0.20 | 0.51 |
| Down's syndrome                         | 0.00 | 0.00 | 0.48 | 0.10 | 0.19 |
| Dysmenorrhoea                           | 0.00 | 0.00 | 0.78 | 0.15 | 0.38 |
| Endometrial hyperplasia and hypertrophy | 0.00 | 0.00 | 0.90 | 0.17 | 0.57 |
| Endometriosis                           | 0.00 | 0.00 | 2.08 | 0.44 | 1.06 |
| Enteropathic arthropathy                | 0.00 | 0.00 | 1.28 | 0.38 | 0.99 |
| Enthesopathy and synovial disorder      | 0.00 | 0.00 | 0.86 | 0.18 | 0.43 |
| Fatty Liver                             | 0.00 | 0.00 | 0.75 | 0.14 | 0.34 |
| Fibromatosis                            | 0.00 | 0.00 | 0.85 | 0.17 | 0.39 |
| Folate deficiency anaemia               | 0.00 | 0.00 | 0.52 | 0.09 | 0.25 |
| Gastritis and duodenitis                | 0.00 | 0.00 | 0.73 | 0.14 | 0.39 |
| Gastro-oesophageal reflux disease       | 0.00 | 0.00 | 0.88 | 0.18 | 0.43 |
| Glaucoma                                | 0.00 | 0.00 | 1.46 | 0.31 | 0.62 |
| HIV                                     | 0.00 | 0.00 | 2.07 | 0.41 | 0.92 |
| Hearing loss                            | 0.00 | 0.00 | 0.77 | 0.16 | 0.34 |
| Hepatic failure                         | 0.00 | 0.00 | 2.22 | 0.46 | 1.07 |
| Hidradenitis suppurativa                | 0.00 | 0.00 | 1.92 | 0.43 | 1.11 |
| Hyperparathyroidism                     | 0.00 | 0.00 | 1.84 | 0.41 | 0.84 |
| Hypersplenism                           | 0.00 | 0.00 | 0.99 | 0.21 | 0.58 |
| Hypertrophic Cardiomyopathy             | 0.00 | 0.00 | 2.23 | 0.49 | 1.00 |
| Hypertrophic Nasal Turbinates           | 0.00 | 0.00 | 0.28 | 0.04 | 0.16 |
| Hyposplenism                            | 0.00 | 0.00 | 1.50 | 0.34 | 0.71 |
| Immunodeficiencies                      | 0.00 | 0.00 | 1.62 | 0.36 | 1.11 |
| Intervertebral disc disorders           | 0.00 | 0.00 | 1.75 | 0.36 | 0.91 |
| Irritable bowel syndrome                | 0.00 | 0.00 | 0.66 | 0.13 | 0.32 |
| Ischaemic stroke                        | 0.00 | 0.00 | 2.03 | 0.46 | 0.99 |
| Left bundle branch block                | 0.00 | 0.00 | 0.77 | 0.15 | 0.39 |
| Macular degeneration                    | 0.00 | 0.00 | 1.16 | 0.25 | 0.71 |
| Meniere's Disease                       | 0.00 | 0.00 | 1.58 | 0.33 | 0.77 |
| Migraine                                | 0.00 | 0.00 | 1.21 | 0.25 | 0.61 |
| Multiple valve disorder                 | 0.00 | 0.00 | 0.49 | 0.09 | 0.33 |
| Neuropathic Bladder                     | 0.00 | 0.00 | 0.74 | 0.15 | 0.36 |



|    |                                        |      |      |      |      |      |
|----|----------------------------------------|------|------|------|------|------|
| 1  |                                        |      |      |      |      |      |
| 2  |                                        |      |      |      |      |      |
| 3  | Nonrheumatic aortic valve disorders    | 0.00 | 0.00 | 1.42 | 0.31 | 0.68 |
| 4  | Nonrheumatic mitral valve disorders    | 0.00 | 0.00 | 0.84 | 0.16 | 0.52 |
| 5  | Obesity                                | 0.00 | 0.00 | 0.71 | 0.15 | 0.44 |
| 6  | Obsessive-compulsive disorder          | 0.00 | 0.00 | 2.55 | 0.56 | 1.21 |
| 7  | Obstructive and reflux uropathy        | 0.00 | 0.00 | 1.10 | 0.23 | 0.63 |
| 8  | Oesophageal varices                    | 0.00 | 0.00 | 1.62 | 0.38 | 0.74 |
| 9  | Osteoarthritis (excl spine)            | 0.00 | 0.00 | 1.53 | 0.34 | 0.70 |
| 10 | Other haemolytic anaemias              | 0.00 | 0.00 | 3.09 | 0.62 | 1.64 |
| 11 | Pancreatitis                           | 0.00 | 0.00 | 2.00 | 0.44 | 1.09 |
| 12 | Pericardial Effusion                   | 0.00 | 0.00 | 1.12 | 0.21 | 0.56 |
| 13 | Peripheral Neuropathy                  | 0.00 | 0.00 | 1.22 | 0.26 | 0.81 |
| 14 | Pleural effusion                       | 0.00 | 0.00 | 1.55 | 0.32 | 0.90 |
| 15 | Pleural plaque                         | 0.00 | 0.00 | 0.74 | 0.14 | 0.48 |
| 16 | Polycystic ovarian syndrome            | 0.00 | 0.00 | 0.86 | 0.20 | 0.34 |
| 17 | Polycythaemia vera                     | 0.00 | 0.00 | 2.49 | 0.54 | 1.30 |
| 18 | Portal hypertension                    | 0.00 | 0.00 | 0.91 | 0.18 | 0.46 |
| 19 | Posterior Uveitis                      | 0.00 | 0.00 | 1.46 | 0.33 | 1.02 |
| 20 | Primary Malignancy_Multiple Sites      | 0.00 | 0.00 | 0.00 | 0.00 | 0.00 |
| 21 | Primary Malignancy_Skin                | 0.00 | 0.00 | 1.30 | 0.31 | 0.78 |
| 22 | Primary Malignancy_other               | 0.00 | 0.00 | 4.42 | 0.90 | 2.44 |
| 23 | Primary Thrombocytopaenia              | 0.00 | 0.00 | 2.41 | 0.59 | 1.96 |
| 24 | Primary pulmonary hypertension         | 0.00 | 0.00 | 1.62 | 0.32 | 1.00 |
| 25 | Psoriasis                              | 0.00 | 0.00 | 1.44 | 0.32 | 0.75 |
| 26 | Pulmonary Fibrosis                     | 0.00 | 0.00 | 2.38 | 0.53 | 1.34 |
| 27 | Raynaud's syndrome                     | 0.00 | 0.00 | 0.85 | 0.16 | 0.45 |
| 28 | Retinal vascular occlusions            | 0.00 | 0.00 | 1.93 | 0.42 | 0.93 |
| 29 | Rheumatic Valve Disorder               | 0.00 | 0.00 | 0.70 | 0.13 | 0.41 |
| 30 | Right bundle branch block combinations | 0.00 | 0.00 | 0.47 | 0.08 | 0.25 |
| 31 | Rosacea                                | 0.00 | 0.00 | 0.93 | 0.20 | 0.41 |
| 32 | Scleritis and episcleritis             | 0.00 | 0.00 | 0.70 | 0.13 | 0.49 |
| 33 | Seborrheic dermatitis                  | 0.00 | 0.00 | 0.61 | 0.11 | 0.31 |
| 34 | Secondary Malignancy_Adrenal Gland     | 0.00 | 0.00 | 1.68 | 0.42 | 1.01 |
| 35 | Secondary Malignancy_Bone              | 0.00 | 0.00 | 4.78 | 0.93 | 2.34 |
| 36 | Secondary Malignancy_Bowel             | 0.00 | 0.00 | 6.36 | 1.41 | 2.42 |
| 37 | Secondary Malignancy_Liver             | 0.00 | 0.00 | 4.82 | 0.91 | 2.26 |
| 38 | Secondary Malignancy_Lung              | 0.00 | 0.00 | 6.04 | 1.10 | 2.27 |
| 39 | Secondary Malignancy_Lymph Nodes       | 0.00 | 0.00 | 2.40 | 0.40 | 1.31 |
| 40 | Secondary Malignancy_Pleura            | 0.00 | 0.00 | 5.69 | 0.94 | 2.50 |
| 41 | Secondary Thrombocytopaenia            | 0.00 | 0.00 | 0.89 | 0.19 | 0.48 |
| 42 | Secondary polycythaemia                | 0.00 | 0.00 | 1.64 | 0.32 | 0.78 |
| 43 | Secondary pulmonary hypertension       | 0.00 | 0.00 | 1.29 | 0.27 | 0.83 |
| 44 | Sick sinus syndrome                    | 0.00 | 0.00 | 0.79 | 0.14 | 0.40 |
| 45 | Sickle Cell Disease                    | 0.00 | 0.00 | 0.98 | 0.29 | 1.07 |
| 46 | Sjogren's Syndrome                     | 0.00 | 0.00 | 1.48 | 0.31 | 0.68 |
| 47 | Sleep apnoea                           | 0.00 | 0.00 | 0.92 | 0.19 | 0.43 |
| 48 | Spina bifida                           | 0.00 | 0.00 | 0.48 | 0.11 | 0.44 |
| 49 | Spinal stenosis                        | 0.00 | 0.00 | 2.34 | 0.50 | 1.06 |
| 50 | Spondylolisthesis                      | 0.00 | 0.00 | 1.22 | 0.23 | 0.63 |
| 51 | Spondylosis                            | 0.00 | 0.00 | 1.01 | 0.21 | 0.57 |
| 52 | Stable Angina                          | 0.00 | 0.00 | 1.62 | 0.37 | 0.78 |

1  
2  
3  
4  
5  
6  
7  
8  
9  
10  
11  
12  
13  
14  
15  
16  
17  
18  
19  
20  
21  
22  
23  
24  
25  
26  
27  
28  
29  
30  
31  
32  
33  
34  
35  
36  
37  
38  
39  
40  
41  
42  
43  
44  
45  
46  
47  
48  
49  
50  
51  
52  
53  
54  
55  
56  
57  
58  
59  
60

|                                         |      |      |      |      |      |
|-----------------------------------------|------|------|------|------|------|
| Subarachnoid haemorrhage                | 0.00 | 0.00 | 2.41 | 0.51 | 1.05 |
| Substance Misuse                        | 0.00 | 0.00 | 1.42 | 0.32 | 1.34 |
| Supraventricular tachycardia            | 0.00 | 0.00 | 1.55 | 0.35 | 0.78 |
| Thalassaemia                            | 0.00 | 0.00 | 0.31 | 0.05 | 0.19 |
| Thrombophilia                           | 0.00 | 0.00 | 0.75 | 0.15 | 0.53 |
| Tinnitus                                | 0.00 | 0.00 | 0.85 | 0.17 | 0.43 |
| Transient ischaemic attack              | 0.00 | 0.00 | 1.56 | 0.35 | 0.70 |
| Trigeminal neuralgia                    | 0.00 | 0.00 | 2.16 | 0.47 | 1.05 |
| Tubulo-interstitial nephritis           | 0.00 | 0.00 | 2.70 | 0.50 | 1.23 |
| Unstable Angina                         | 0.00 | 0.00 | 1.17 | 0.23 | 0.58 |
| Urinary Incontinence                    | 0.00 | 0.00 | 0.87 | 0.18 | 0.38 |
| Venous thromboembolic disease (Excl PE) | 0.00 | 0.00 | 1.85 | 0.41 | 1.05 |
| Ventricular tachycardia                 | 0.00 | 0.00 | 1.64 | 0.32 | 0.75 |
| Visual impairment and blindness         | 0.00 | 0.00 | 0.73 | 0.13 | 0.31 |
| Vitiligo                                | 0.00 | 0.00 | 0.73 | 0.14 | 0.32 |

**Figure A1: Boxplots of observed and expected mean yearly codes at a GP practice level for QOF conditions in year 1 (A) and year 2 (B) and non-QOF conditions in year 1 (C) and year 2 (D) following diagnosis**

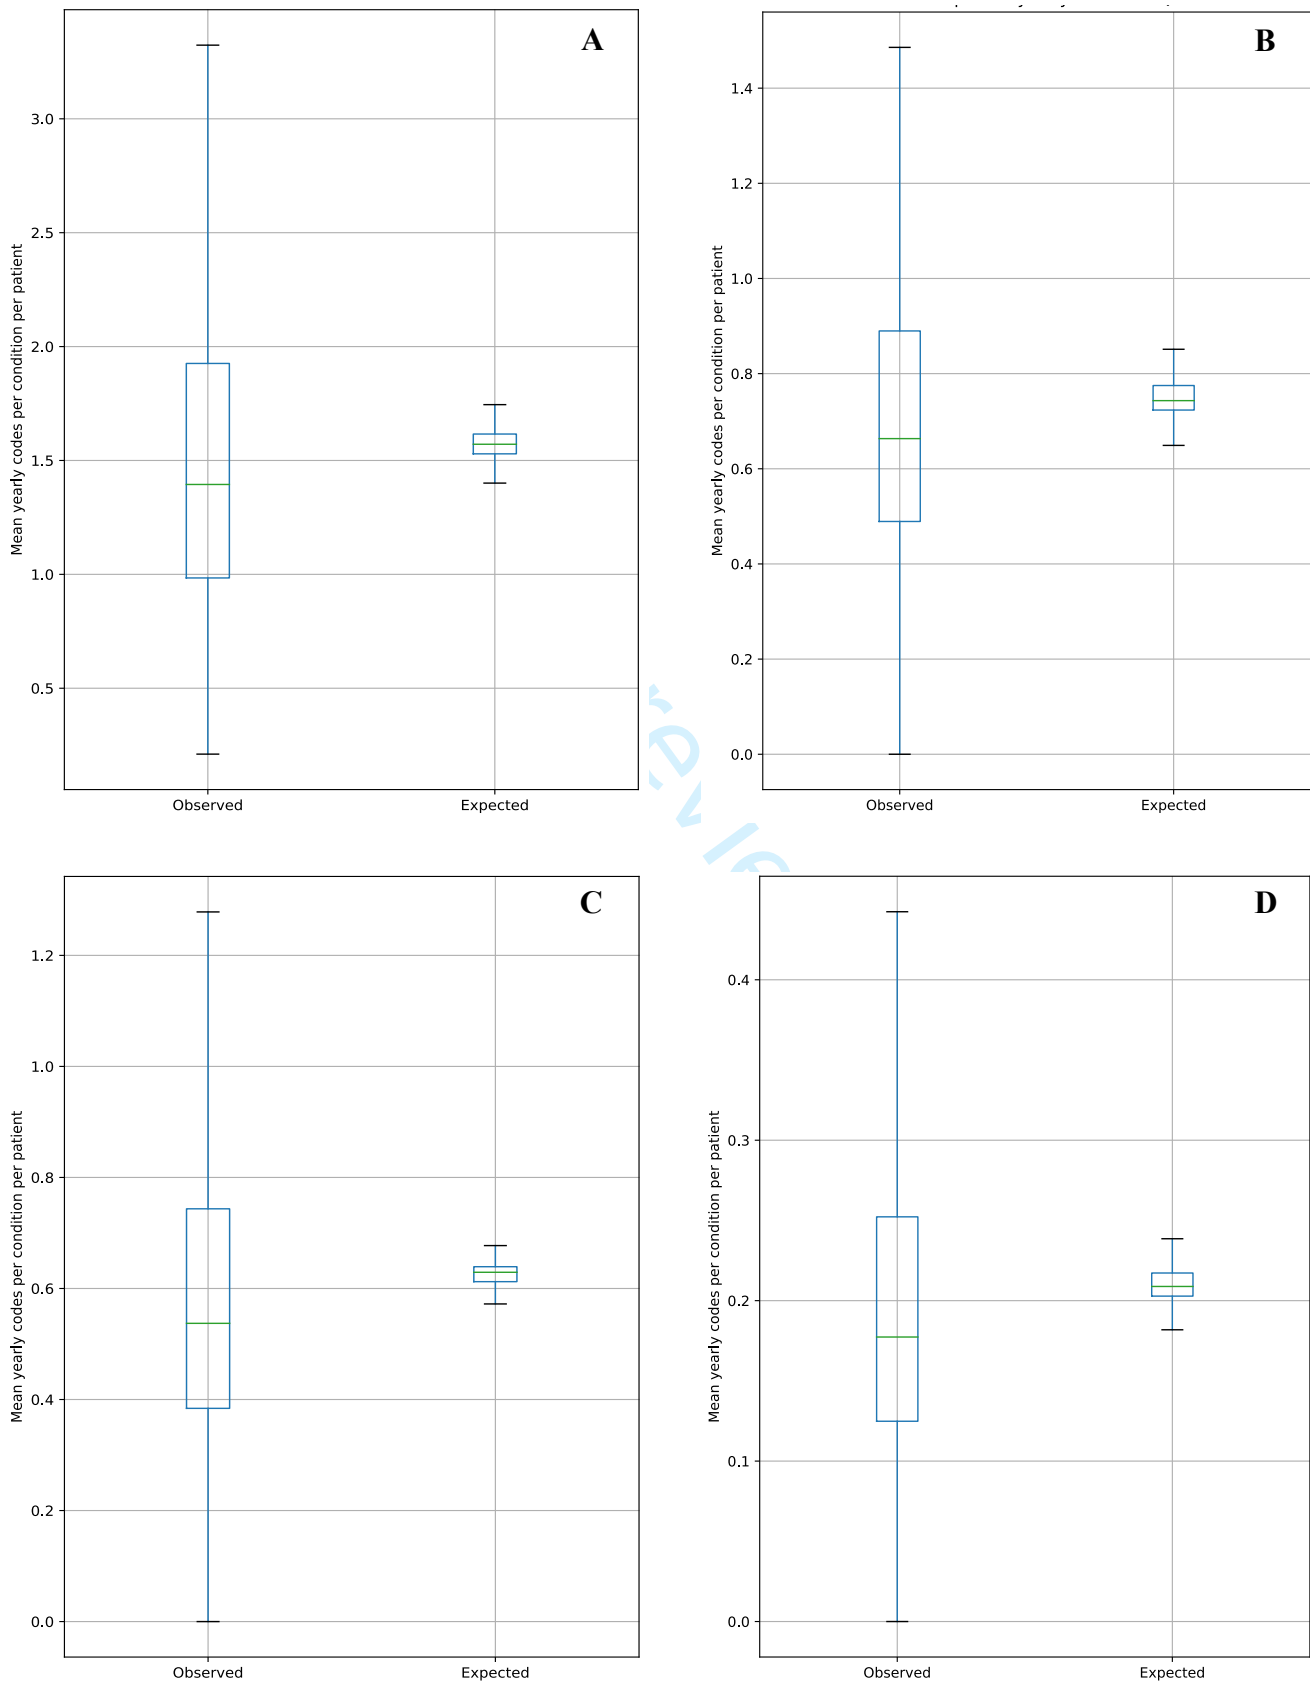

Figure A2: ratio of mean yearly codes in year 1 following diagnosis to subsequent years for QOF conditions

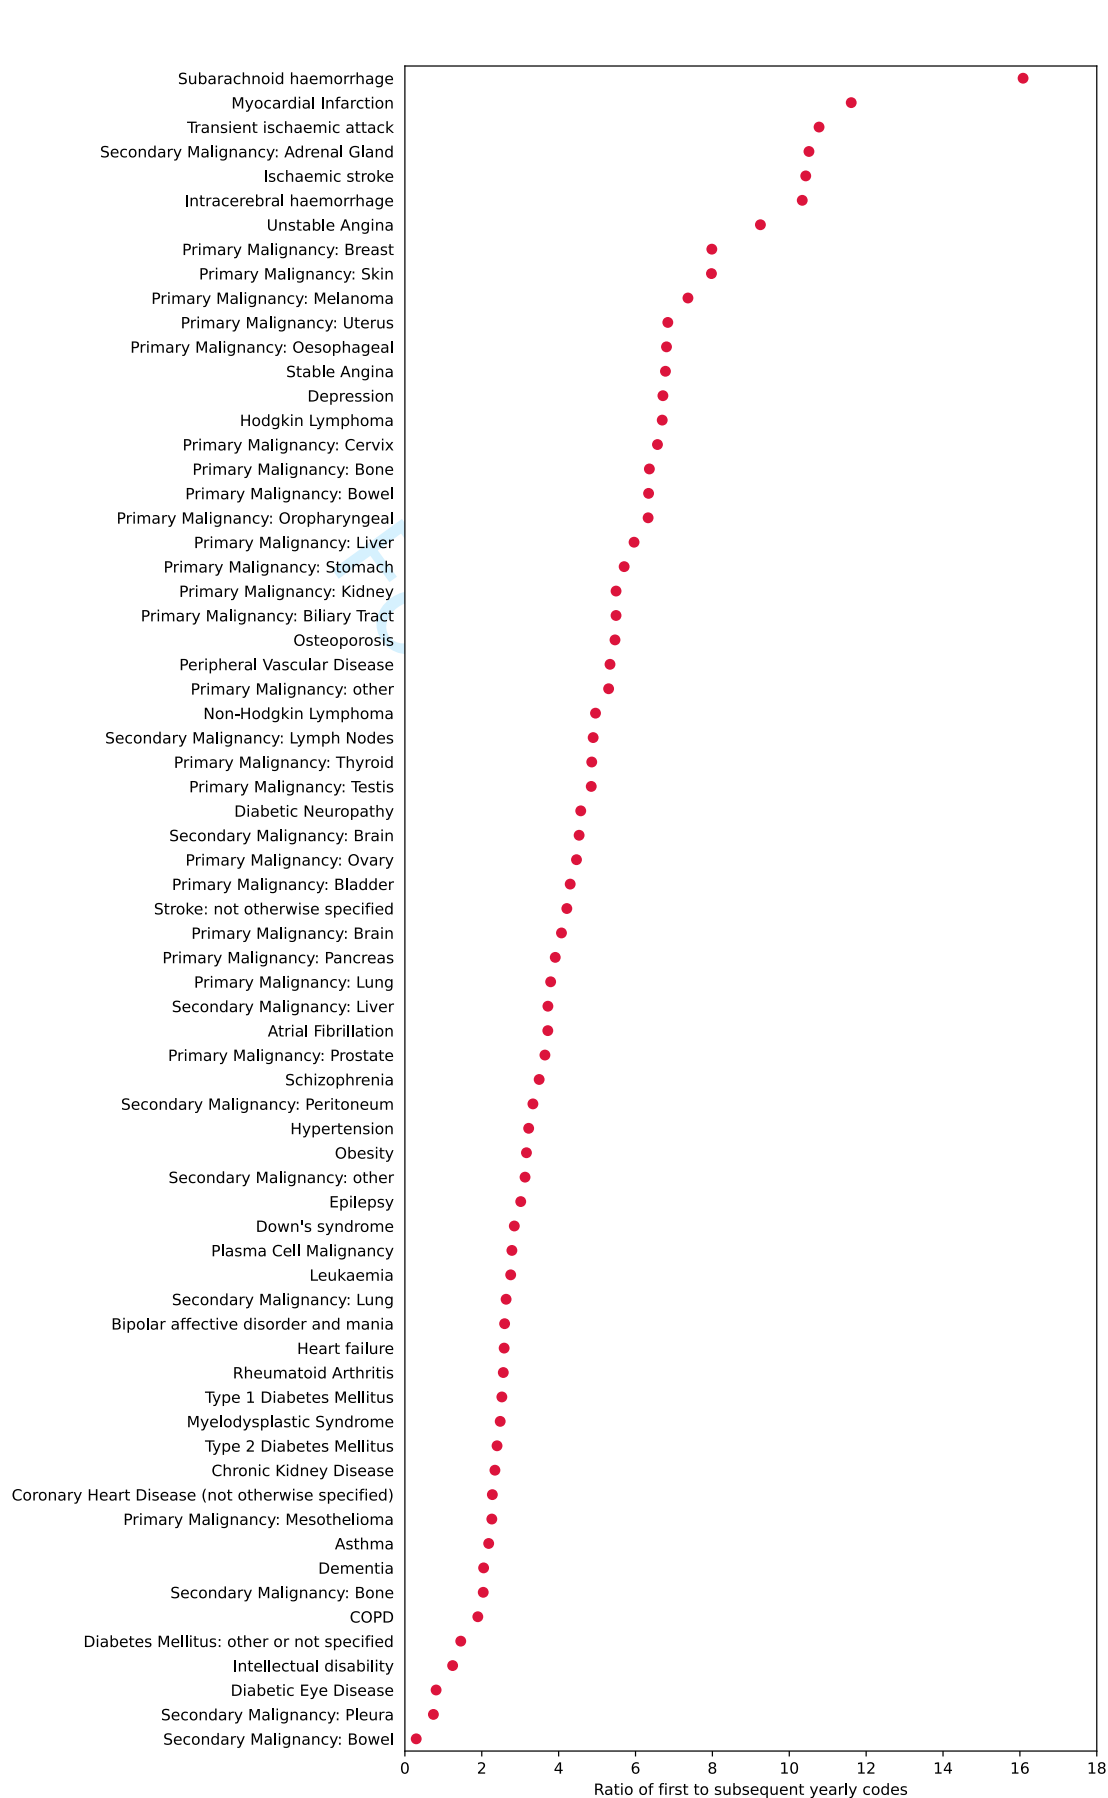

Figure A3: Ratio of mean yearly codes in year 1 following diagnosis to subsequent years for non-QOF

conditions

1  
2  
3  
4  
5  
6  
7  
8  
9  
10  
11  
12  
13  
14  
15  
16  
17  
18  
19  
20  
21  
22  
23  
24  
25  
26  
27  
28  
29  
30  
31  
32  
33  
34  
35  
36  
37  
38  
39  
40  
41  
42  
43  
44  
45  
46  
47  
48  
49  
50  
51  
52  
53  
54  
55  
56  
57  
58  
59  
60

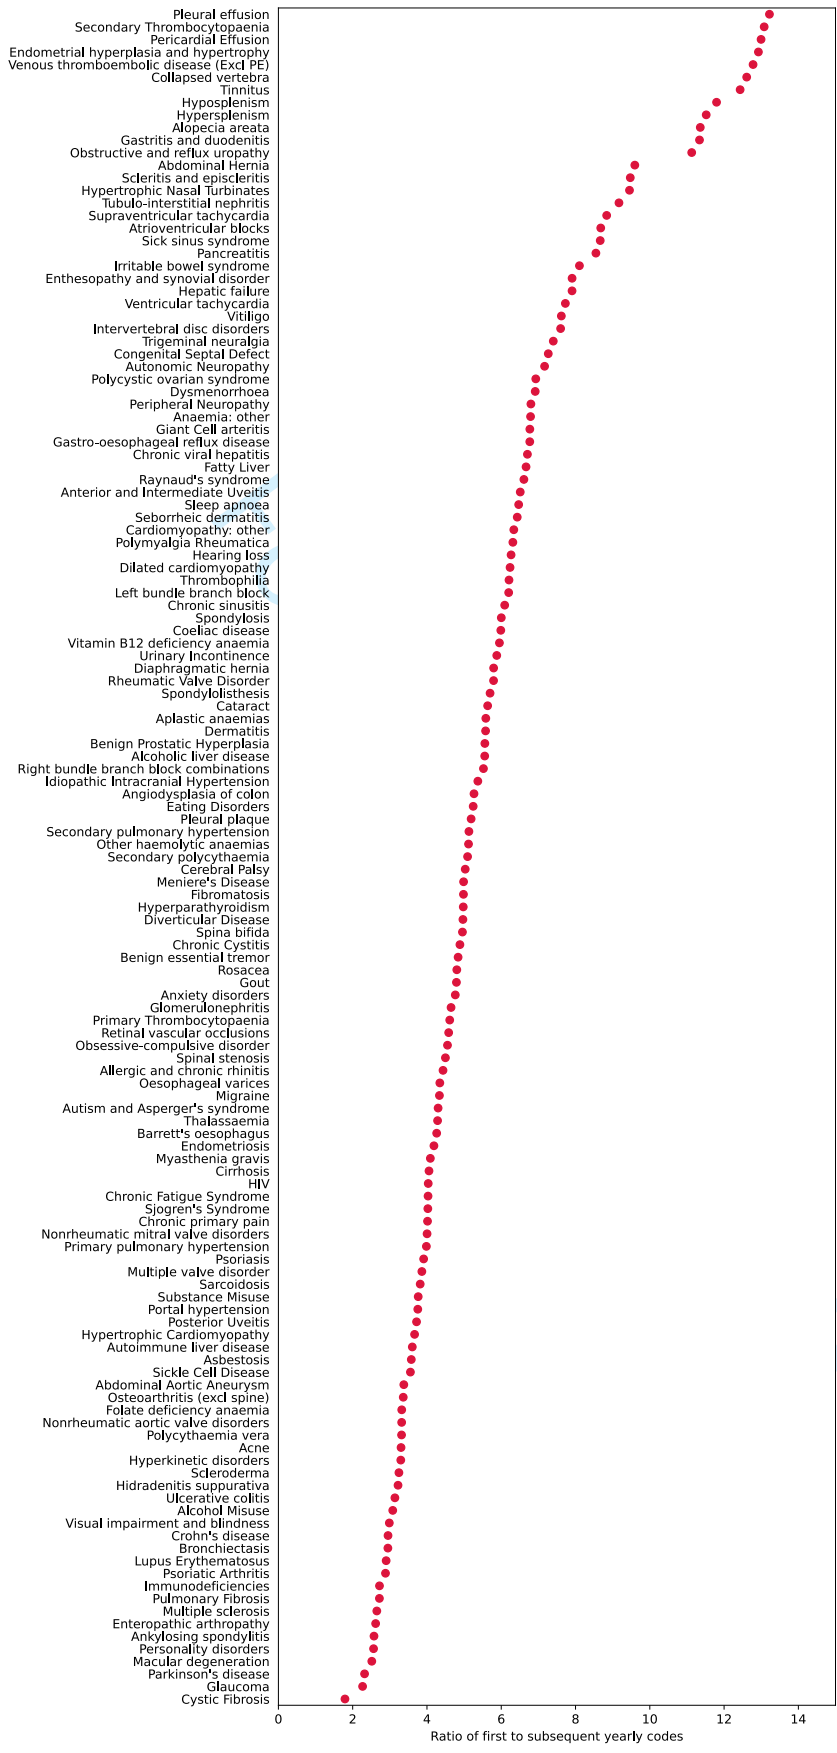

**Figure A4: Boxplots of the distribution of mean yearly codes following diagnosis for newly diagnosed conditions by GP practice stratified by inclusion in QOF**

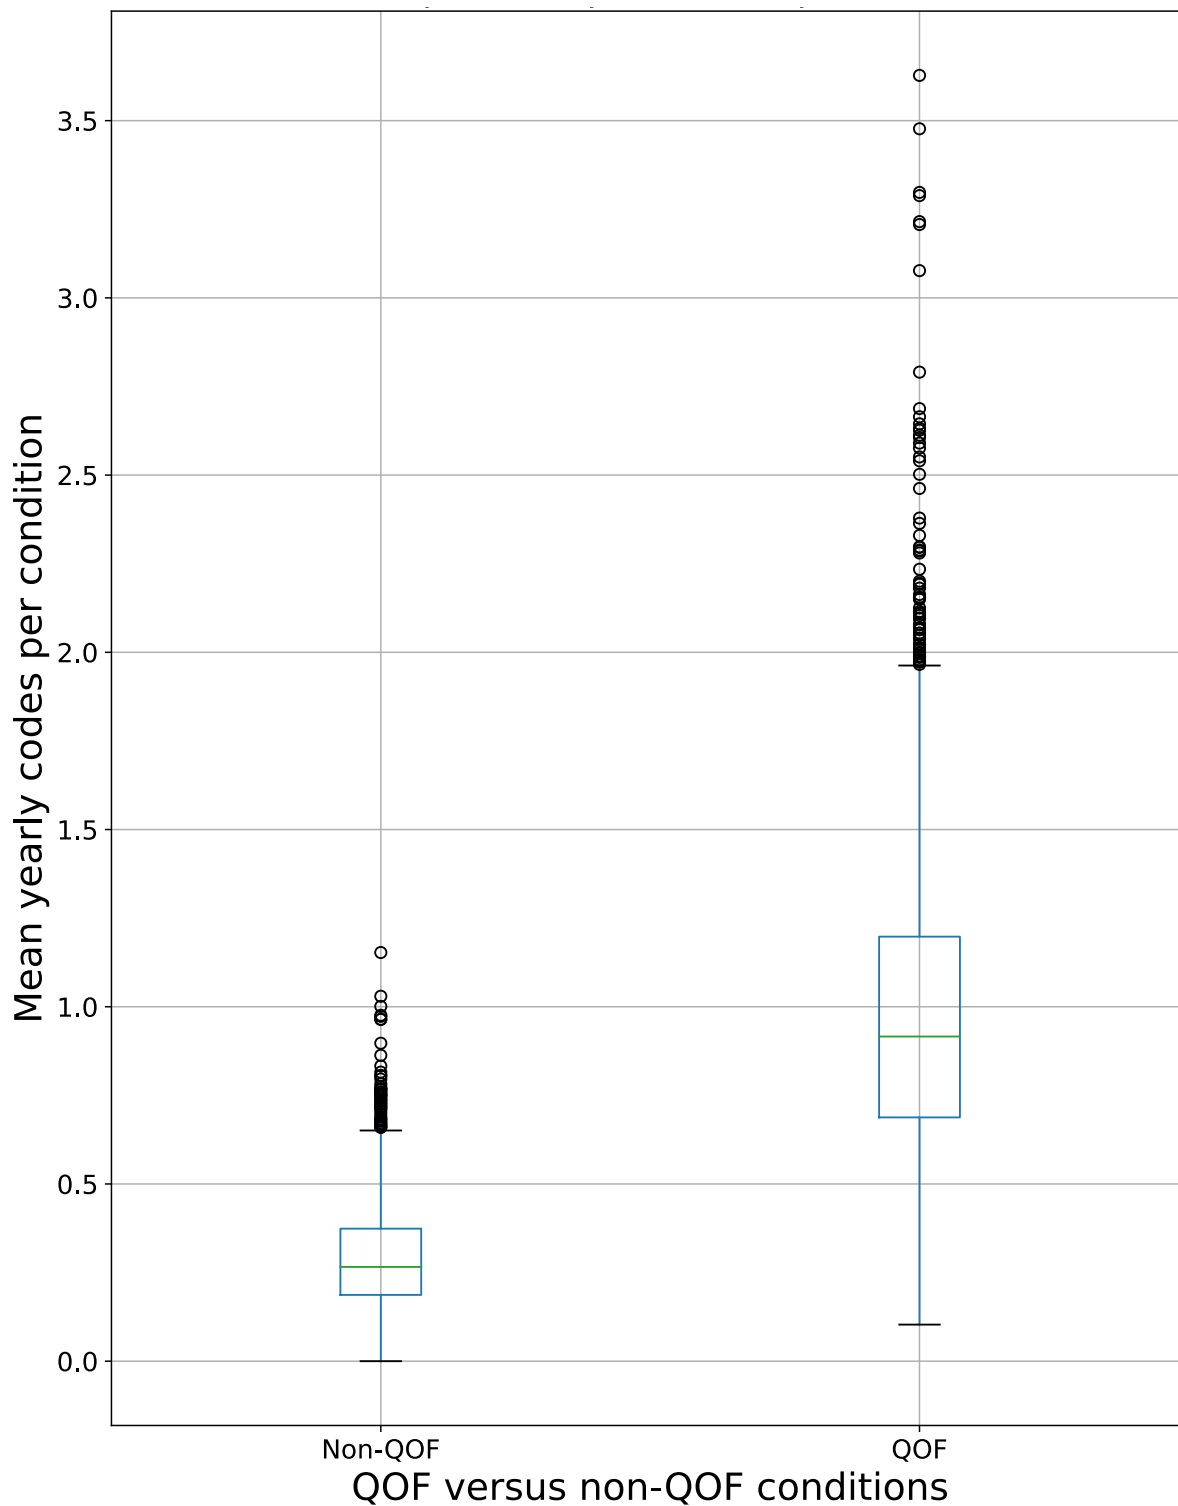

1  
2  
3  
4  
5  
6  
7  
8  
9  
10  
11  
12  
13  
14  
15  
16  
17  
18  
19  
20  
21  
22  
23  
24  
25  
26  
27  
28  
29  
30  
31  
32  
33  
34  
35  
36  
37  
38  
39  
40  
41  
42  
43  
44  
45  
46  
47  
48  
49  
50  
51  
52  
53  
54  
55  
56  
57  
58  
59  
60

**Figure A5: boxplots of mean yearly codes at a GP practice level by practice level Index of Multiple Deprivation decile (1 = most deprived, 10 = least deprived)**

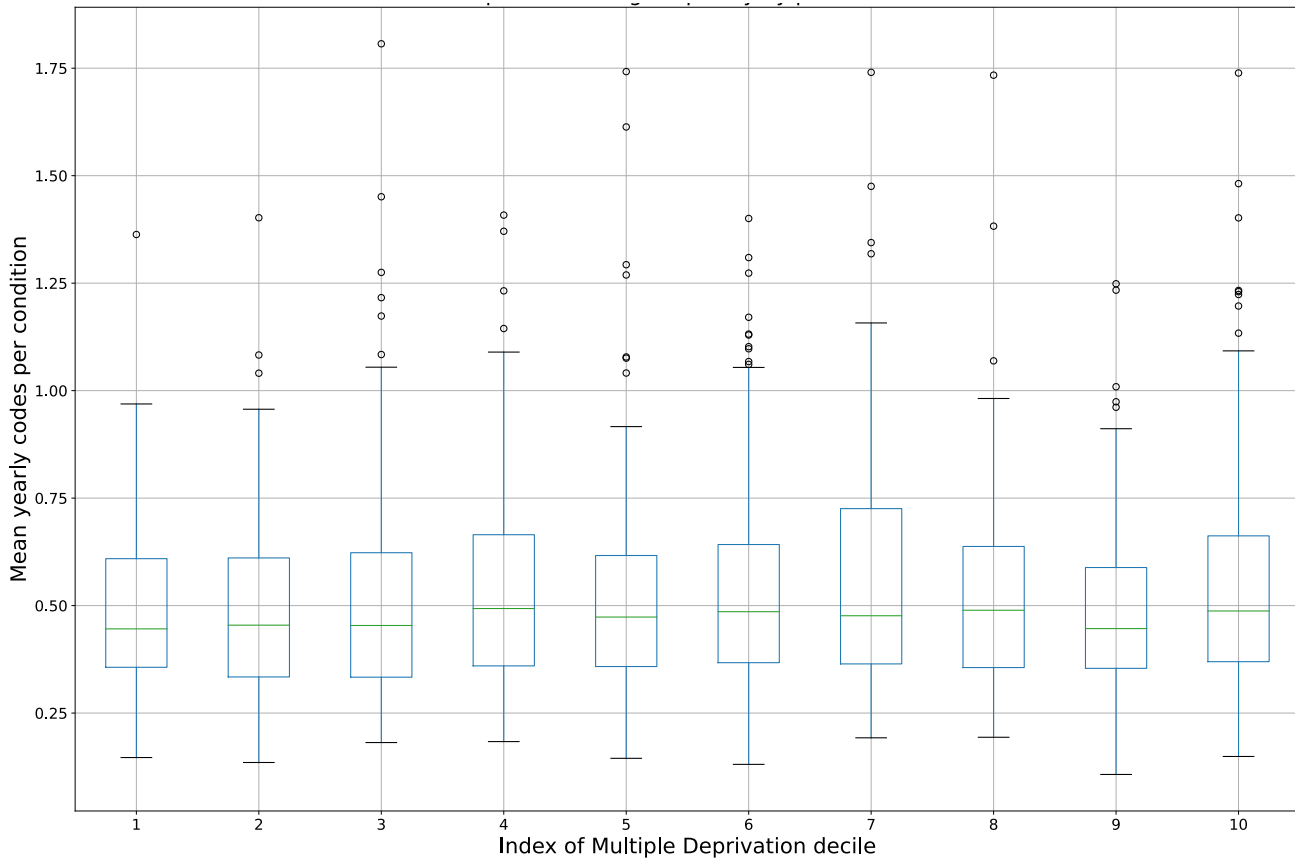

Footnote: combines QOF and non-QOF conditions

**Table A5: Associations of rate of codes in year one following diagnosis for conditions included in QOF (N=1730485)**

| Variable                                         | Primary analysis |         |        |       | Sensitivity analysis including consultation number |         |        |       |
|--------------------------------------------------|------------------|---------|--------|-------|----------------------------------------------------|---------|--------|-------|
|                                                  | IRR              | P-value | 95% CI |       | IRR                                                | P-value | 95% CI |       |
|                                                  |                  |         | Lower  | Upper |                                                    |         | Lower  | Upper |
| <b>Age category (years)</b>                      |                  |         |        |       |                                                    |         |        |       |
| Under 40                                         | 1.33             | 0.00    | 1.32   | 1.34  | 1.30                                               | 0.00    | 1.29   | 1.31  |
| 40-49                                            | 1.15             | 0.00    | 1.14   | 1.15  | 1.14                                               | 0.00    | 1.13   | 1.15  |
| 50-59                                            | 1.08             | 0.00    | 1.07   | 1.08  | 1.07                                               | 0.00    | 1.07   | 1.08  |
| 60-69 (reference)                                | -                | -       | -      | -     | -                                                  | -       | -      | -     |
| 70-79                                            | 0.96             | 0.00    | 0.95   | 0.96  | 0.94                                               | 0.00    | 0.93   | 0.95  |
| 80 or more                                       | 0.91             | 0.00    | 0.90   | 0.92  | 0.88                                               | 0.00    | 0.87   | 0.88  |
| <b>Sex</b>                                       |                  |         |        |       |                                                    |         |        |       |
| Female (reference)                               | -                | -       | -      | -     | -                                                  | -       | -      | -     |
| Male                                             | 1.03             | 0.00    | 1.02   | 1.03  | 1.10                                               | 0.00    | 1.10   | 1.11  |
| <b>Ethnicity category</b>                        |                  |         |        |       |                                                    |         |        |       |
| White (reference)                                | -                | -       | -      | -     | -                                                  | -       | -      | -     |
| South Asian                                      | 0.96             | 0.00    | 0.95   | 0.97  | 0.92                                               | 0.00    | 0.91   | 0.93  |
| Black                                            | 0.94             | 0.00    | 0.93   | 0.95  | 0.94                                               | 0.00    | 0.93   | 0.95  |
| Other                                            | 0.95             | 0.00    | 0.93   | 0.97  | 0.96                                               | 0.00    | 0.94   | 0.98  |
| Mixed                                            | 0.98             | 0.03    | 0.95   | 1.00  | 0.97                                               | 0.00    | 0.95   | 0.99  |
| Missing                                          | 0.98             | 0.00    | 0.97   | 0.99  | 1.01                                               | 0.00    | 1.00   | 1.02  |
| <b>IMD decile</b>                                |                  |         |        |       |                                                    |         |        |       |
| 1 (most deprived)                                | -                | -       | -      | -     | -                                                  | -       | -      | -     |
| 2                                                | 1.01             | 0.19    | 1.00   | 1.01  | 1.00                                               | 0.95    | 0.99   | 1.01  |
| 3                                                | 1.02             | 0.00    | 1.01   | 1.03  | 1.01                                               | 0.08    | 1.00   | 1.02  |
| 4                                                | 1.02             | 0.00    | 1.01   | 1.03  | 1.01                                               | 0.01    | 1.00   | 1.02  |
| 5                                                | 1.02             | 0.00    | 1.01   | 1.03  | 1.01                                               | 0.06    | 1.00   | 1.02  |
| 6                                                | 1.03             | 0.00    | 1.02   | 1.04  | 1.01                                               | 0.02    | 1.00   | 1.02  |
| 7                                                | 1.04             | 0.00    | 1.03   | 1.05  | 1.02                                               | 0.00    | 1.01   | 1.03  |
| 8                                                | 1.04             | 0.00    | 1.03   | 1.05  | 1.01                                               | 0.01    | 1.00   | 1.02  |
| 9                                                | 1.05             | 0.00    | 1.04   | 1.06  | 1.02                                               | 0.00    | 1.01   | 1.03  |
| 10 (least deprived)                              | 1.05             | 0.00    | 1.04   | 1.06  | 1.01                                               | 0.06    | 1.00   | 1.02  |
| <b>Number of QOF diseases</b>                    |                  |         |        |       |                                                    |         |        |       |
| 0 (reference)                                    | -                | -       | -      | -     | -                                                  | -       | -      | -     |
| 1                                                | 0.90             | 0.00    | 0.90   | 0.91  | 0.87                                               | 0.00    | 0.86   | 0.87  |
| 2                                                | 0.80             | 0.00    | 0.80   | 0.81  | 0.75                                               | 0.00    | 0.75   | 0.76  |
| 3                                                | 0.71             | 0.00    | 0.70   | 0.71  | 0.66                                               | 0.00    | 0.65   | 0.66  |
| 4 or more                                        | 0.63             | 0.00    | 0.62   | 0.63  | 0.56                                               | 0.00    | 0.55   | 0.56  |
| <b>Number of non-QOF diseases</b>                |                  |         |        |       |                                                    |         |        |       |
| 0 (reference)                                    | -                | -       | -      | -     | -                                                  | -       | -      | -     |
| 1                                                | 1.16             | 0.00    | 1.16   | 1.17  | 1.08                                               | 0.00    | 1.07   | 1.08  |
| 2                                                | 1.13             | 0.00    | 1.12   | 1.14  | 1.02                                               | 0.00    | 1.01   | 1.02  |
| 3                                                | 1.12             | 0.00    | 1.11   | 1.12  | 0.97                                               | 0.00    | 0.96   | 0.98  |
| 4 or more                                        | 1.13             | 0.00    | 1.12   | 1.13  | 0.90                                               | 0.00    | 0.89   | 0.90  |
| <b>Calendar year of diagnosis</b>                |                  |         |        |       |                                                    |         |        |       |
| 2015 (reference)                                 | -                | -       | -      | -     | -                                                  | -       | -      | -     |
| 2016                                             | 1.00             | 0.89    | 0.99   | 1.01  | 1.02                                               | 0.00    | 1.02   | 1.03  |
| 2017                                             | 1.00             | 0.34    | 1.00   | 1.01  | 1.05                                               | 0.00    | 1.04   | 1.05  |
| 2018                                             | 1.00             | 0.18    | 0.99   | 1.00  | 1.06                                               | 0.00    | 1.06   | 1.07  |
| 2019                                             | 0.95             | 0.00    | 0.94   | 0.96  | 1.04                                               | 0.00    | 1.04   | 1.05  |
| <b>Average number of consultations in year 1</b> |                  |         |        |       |                                                    |         |        |       |
| Less than 1 (reference)                          | -                | -       | -      | -     | -                                                  | -       | -      | -     |
| 1-2                                              | -                | -       | -      | -     | 1.62                                               | 0.00    | 1.60   | 1.63  |
| 3-4                                              | -                | -       | -      | -     | 2.21                                               | 0.00    | 2.19   | 2.23  |
| 5-9                                              | -                | -       | -      | -     | 2.87                                               | 0.00    | 2.84   | 2.89  |
| 10 or more                                       | -                | -       | -      | -     | 3.75                                               | 0.00    | 3.71   | 3.79  |

From negative binomial regression models, including practice-level fixed effects (not shown)



**Table A6: Associations of rate of codes in year two following diagnosis for conditions included in QOF (N=1714684)**

| Variable                                         | Primary analysis |         |        |       | Sensitivity analysis including consultation number |         |        |       |
|--------------------------------------------------|------------------|---------|--------|-------|----------------------------------------------------|---------|--------|-------|
|                                                  | IRR              | P-value | 95% CI |       | IRR                                                | P-value | 95% CI |       |
|                                                  |                  |         | Lower  | Upper |                                                    |         | Lower  | Upper |
| <b>Age category (years)</b>                      |                  |         |        |       |                                                    |         |        |       |
| Under 40                                         | 0.87             | 0.00    | 0.86   | 0.87  | 0.86                                               | 0.00    | 0.86   | 0.87  |
| 40-49                                            | 1.01             | 0.03    | 1.00   | 1.02  | 1.01                                               | 0.22    | 1.00   | 1.01  |
| 50-59                                            | 1.03             | 0.00    | 1.02   | 1.04  | 1.03                                               | 0.00    | 1.02   | 1.04  |
| 60-69 (reference)                                | -                | -       | -      | -     | -                                                  | -       | -      | -     |
| 70-79                                            | 0.95             | 0.00    | 0.94   | 0.96  | 0.93                                               | 0.00    | 0.93   | 0.94  |
| 80 or more                                       | 0.89             | 0.00    | 0.88   | 0.90  | 0.86                                               | 0.00    | 0.85   | 0.87  |
| <b>Sex</b>                                       |                  |         |        |       |                                                    |         |        |       |
| Female (reference)                               | -                | -       | -      | -     | -                                                  | -       | -      | -     |
| Male                                             | 1.11             | 0.00    | 1.11   | 1.12  | 1.18                                               | 0.00    | 1.17   | 1.18  |
| <b>Ethnicity category</b>                        |                  |         |        |       |                                                    |         |        |       |
| White (reference)                                | -                | -       | -      | -     | -                                                  | -       | -      | -     |
| South Asian                                      | 1.26             | 0.00    | 1.25   | 1.28  | 1.22                                               | 0.00    | 1.20   | 1.23  |
| Black                                            | 1.17             | 0.00    | 1.16   | 1.19  | 1.17                                               | 0.00    | 1.15   | 1.19  |
| Other                                            | 1.13             | 0.00    | 1.10   | 1.16  | 1.14                                               | 0.00    | 1.11   | 1.17  |
| Mixed                                            | 1.12             | 0.00    | 1.08   | 1.15  | 1.11                                               | 0.00    | 1.07   | 1.14  |
| Missing                                          | 0.89             | 0.00    | 0.88   | 0.90  | 0.93                                               | 0.00    | 0.92   | 0.93  |
| <b>IMD decile</b>                                |                  |         |        |       |                                                    |         |        |       |
| 1 (most deprived)                                | -                | -       | -      | -     | -                                                  | -       | -      | -     |
| 2                                                | 1.02             | 0.00    | 1.01   | 1.04  | 1.02                                               | 0.00    | 1.01   | 1.03  |
| 3                                                | 1.03             | 0.00    | 1.02   | 1.05  | 1.03                                               | 0.00    | 1.02   | 1.04  |
| 4                                                | 1.05             | 0.00    | 1.03   | 1.06  | 1.04                                               | 0.00    | 1.03   | 1.05  |
| 5                                                | 1.05             | 0.00    | 1.04   | 1.07  | 1.04                                               | 0.00    | 1.03   | 1.06  |
| 6                                                | 1.06             | 0.00    | 1.05   | 1.07  | 1.05                                               | 0.00    | 1.04   | 1.07  |
| 7                                                | 1.08             | 0.00    | 1.06   | 1.09  | 1.06                                               | 0.00    | 1.05   | 1.08  |
| 8                                                | 1.09             | 0.00    | 1.07   | 1.10  | 1.07                                               | 0.00    | 1.06   | 1.08  |
| 9                                                | 1.11             | 0.00    | 1.10   | 1.13  | 1.09                                               | 0.00    | 1.08   | 1.11  |
| 10 (least deprived)                              | 1.14             | 0.00    | 1.12   | 1.15  | 1.11                                               | 0.00    | 1.09   | 1.12  |
| <b>Number of QOF diseases</b>                    |                  |         |        |       |                                                    |         |        |       |
| 0 (reference)                                    | -                | -       | -      | -     | -                                                  | -       | -      | -     |
| 1                                                | 1.05             | 0.00    | 1.04   | 1.06  | 1.00                                               | 0.79    | 0.99   | 1.01  |
| 2                                                | 1.07             | 0.00    | 1.06   | 1.08  | 0.99                                               | 0.05    | 0.98   | 1.00  |
| 3                                                | 0.99             | 0.15    | 0.98   | 1.00  | 0.91                                               | 0.00    | 0.90   | 0.92  |
| 4 or more                                        | 0.87             | 0.00    | 0.86   | 0.88  | 0.77                                               | 0.00    | 0.76   | 0.78  |
| <b>Number of non-QOF diseases</b>                |                  |         |        |       |                                                    |         |        |       |
| 0 (reference)                                    | -                | -       | -      | -     | -                                                  | -       | -      | -     |
| 1                                                | 1.05             | 0.00    | 1.04   | 1.06  | 0.99                                               | 0.11    | 0.98   | 1.00  |
| 2                                                | 1.04             | 0.00    | 1.03   | 1.05  | 0.96                                               | 0.00    | 0.95   | 0.97  |
| 3                                                | 1.04             | 0.00    | 1.03   | 1.05  | 0.93                                               | 0.00    | 0.92   | 0.94  |
| 4 or more                                        | 1.05             | 0.00    | 1.04   | 1.06  | 0.88                                               | 0.00    | 0.87   | 0.89  |
| <b>Calendar year of diagnosis</b>                |                  |         |        |       |                                                    |         |        |       |
| 2015 (reference)                                 | -                | -       | -      | -     | -                                                  | -       | -      | -     |
| 2016                                             | 1.00             | 0.45    | 0.99   | 1.01  | 1.02                                               | 0.00    | 1.01   | 1.03  |
| 2017                                             | 0.99             | 0.00    | 0.98   | 0.99  | 1.02                                               | 0.00    | 1.01   | 1.03  |
| 2018                                             | 0.91             | 0.00    | 0.90   | 0.92  | 0.96                                               | 0.00    | 0.95   | 0.97  |
| 2019                                             | 0.79             | 0.00    | 0.79   | 0.80  | 0.86                                               | 0.00    | 0.86   | 0.87  |
| <b>Average number of consultations in year 1</b> |                  |         |        |       |                                                    |         |        |       |
| Less than 1 (reference)                          | -                | -       | -      | -     | -                                                  | -       | -      | -     |
| 2                                                |                  |         |        |       | 1.53                                               | 0.00    | 1.52   | 1.55  |
| 3-4                                              |                  |         |        |       | 1.87                                               | 0.00    | 1.85   | 1.89  |
| 5-9                                              |                  |         |        |       | 2.17                                               | 0.00    | 2.15   | 2.20  |
| 10 or more                                       |                  |         |        |       | 2.59                                               | 0.00    | 2.57   | 2.62  |

From negative binomial regression models, including practice-level fixed effects (not shown)

Table A7: Associations of rate of codes in year one following diagnosis for conditions not included in QOF (N=3617348)

| Variable                                         | Primary analysis |         |        |       | Sensitivity analysis including consultation number |         |        |       |
|--------------------------------------------------|------------------|---------|--------|-------|----------------------------------------------------|---------|--------|-------|
|                                                  | IRR              | P-value | 95% CI |       | IRR                                                | P-value | 95% CI |       |
|                                                  |                  |         | Lower  | Upper |                                                    |         | Lower  | Upper |
| <b>Age category (years)</b>                      |                  |         |        |       |                                                    |         |        |       |
| Under 40                                         | 1.10             | 0.00    | 1.10   | 1.11  | 1.09                                               | 0.00    | 1.08   | 1.10  |
| 40-49                                            | 1.01             | 0.00    | 1.00   | 1.02  | 1.02                                               | 0.00    | 1.01   | 1.03  |
| 50-59                                            | 0.98             | 0.00    | 0.98   | 0.99  | 0.99                                               | 0.09    | 0.99   | 1.00  |
| 60-69 (reference)                                | -                | -       | -      | -     | -                                                  | -       | -      | -     |
| 70-79                                            | 1.05             | 0.00    | 1.05   | 1.06  | 1.03                                               | 0.00    | 1.02   | 1.03  |
| 80 or more                                       | 1.02             | 0.00    | 1.02   | 1.03  | 0.98                                               | 0.00    | 0.97   | 0.99  |
| <b>Sex</b>                                       |                  |         |        |       |                                                    |         |        |       |
| Female (reference)                               | -                | -       | -      | -     | -                                                  | -       | -      | -     |
| Male                                             | 1.00             | 0.03    | 0.99   | 1.00  | 1.13                                               | 0.00    | 1.12   | 1.13  |
| <b>Ethnicity category</b>                        |                  |         |        |       |                                                    |         |        |       |
| White (reference)                                | -                | -       | -      | -     | -                                                  | -       | -      | -     |
| South Asian                                      | 0.95             | 0.00    | 0.94   | 0.96  | 0.89                                               | 0.00    | 0.88   | 0.90  |
| Black                                            | 0.89             | 0.00    | 0.88   | 0.90  | 0.86                                               | 0.00    | 0.85   | 0.87  |
| Other                                            | 0.90             | 0.00    | 0.88   | 0.91  | 0.89                                               | 0.00    | 0.88   | 0.91  |
| Mixed                                            | 0.95             | 0.00    | 0.93   | 0.97  | 0.92                                               | 0.00    | 0.91   | 0.94  |
| Missing                                          | 0.99             | 0.14    | 0.99   | 1.00  | 1.06                                               | 0.00    | 1.05   | 1.06  |
| <b>IMD decile</b>                                |                  |         |        |       |                                                    |         |        |       |
| 1 (most deprived)                                | -                | -       | -      | -     | -                                                  | -       | -      | -     |
| 2                                                | 1.00             | 0.86    | 0.99   | 1.01  | 0.99                                               | 0.06    | 0.98   | 1.00  |
| 3                                                | 1.01             | 0.01    | 1.00   | 1.02  | 1.00                                               | 0.82    | 0.99   | 1.01  |
| 4                                                | 1.02             | 0.00    | 1.01   | 1.03  | 1.00                                               | 0.42    | 0.99   | 1.01  |
| 5                                                | 1.02             | 0.00    | 1.01   | 1.03  | 1.00                                               | 0.86    | 0.99   | 1.01  |
| 6                                                | 1.03             | 0.00    | 1.02   | 1.04  | 0.99                                               | 0.26    | 0.99   | 1.00  |
| 7                                                | 1.03             | 0.00    | 1.02   | 1.04  | 0.99                                               | 0.08    | 0.98   | 1.00  |
| 8                                                | 1.04             | 0.00    | 1.03   | 1.06  | 0.99                                               | 0.15    | 0.98   | 1.00  |
| 9                                                | 1.06             | 0.00    | 1.05   | 1.07  | 0.99                                               | 0.19    | 0.98   | 1.00  |
| 10 (least deprived)                              | 1.06             | 0.00    | 1.05   | 1.07  | 0.98                                               | 0.00    | 0.97   | 0.99  |
| <b>Number of QOF diseases</b>                    |                  |         |        |       |                                                    |         |        |       |
| 0 (reference)                                    | -                | -       | -      | -     | -                                                  | -       | -      | -     |
| 1                                                | 1.16             | 0.00    | 1.15   | 1.16  | 1.02                                               | 0.00    | 1.02   | 1.03  |
| 2                                                | 1.09             | 0.00    | 1.08   | 1.09  | 0.94                                               | 0.00    | 0.93   | 0.94  |
| 3                                                | 1.06             | 0.00    | 1.05   | 1.07  | 0.90                                               | 0.00    | 0.89   | 0.91  |
| 4 or more                                        | 1.04             | 0.00    | 1.03   | 1.04  | 0.85                                               | 0.00    | 0.84   | 0.85  |
| <b>Number of non-QOF diseases</b>                |                  |         |        |       |                                                    |         |        |       |
| 0 (reference)                                    | -                | -       | -      | -     | -                                                  | -       | -      | -     |
| 1                                                | 1.02             | 0.00    | 1.01   | 1.02  | 0.93                                               | 0.00    | 0.92   | 0.94  |
| 2                                                | 1.02             | 0.00    | 1.02   | 1.03  | 0.87                                               | 0.00    | 0.87   | 0.88  |
| 3                                                | 1.04             | 0.00    | 1.03   | 1.05  | 0.83                                               | 0.00    | 0.82   | 0.84  |
| 4 or more                                        | 1.06             | 0.00    | 1.06   | 1.07  | 0.74                                               | 0.00    | 0.74   | 0.75  |
| <b>Calendar year of diagnosis</b>                |                  |         |        |       |                                                    |         |        |       |
| 2015 (reference)                                 | -                | -       | -      | -     | -                                                  | -       | -      | -     |
| 2016                                             | 1.00             | 0.55    | 0.99   | 1.00  | 1.03                                               | 0.00    | 1.02   | 1.03  |
| 2017                                             | 0.99             | 0.00    | 0.99   | 1.00  | 1.05                                               | 0.00    | 1.04   | 1.05  |
| 2018                                             | 0.99             | 0.00    | 0.98   | 0.99  | 1.07                                               | 0.00    | 1.06   | 1.07  |
| 2019                                             | 0.94             | 0.00    | 0.94   | 0.95  | 1.06                                               | 0.00    | 1.06   | 1.07  |
| <b>Average number of consultations in year 1</b> |                  |         |        |       |                                                    |         |        |       |
| Less than 1 (reference)                          | -                | -       | -      | -     | -                                                  | -       | -      | -     |
| 1-2                                              |                  |         |        |       | 2.38                                               | 0.00    | 2.36   | 2.40  |
| 3-4                                              |                  |         |        |       | 3.49                                               | 0.00    | 3.45   | 3.52  |
| 5-9                                              |                  |         |        |       | 4.67                                               | 0.00    | 4.62   | 4.71  |
| 10 or more                                       |                  |         |        |       | 6.37                                               | 0.00    | 6.31   | 6.44  |

From negative binomial regression models, including practice-level fixed effects (not shown)

**Table A8: Associations of rate of codes in year two following diagnosis for conditions not included in QOF (N=3593019)**

| Variable                                         | Primary analysis |         |        |       | Sensitivity analysis including consultation number |         |        |       |
|--------------------------------------------------|------------------|---------|--------|-------|----------------------------------------------------|---------|--------|-------|
|                                                  | IRR              | P-value | 95% CI |       | IRR                                                | P-value | 95% CI |       |
|                                                  |                  |         | Lower  | Upper |                                                    |         | Lower  | Upper |
| <b>Age category (years)</b>                      |                  |         |        |       |                                                    |         |        |       |
| Under 40                                         | 1.27             | 0.00    | 1.26   | 1.28  | 1.26                                               | 0.00    | 1.25   | 1.28  |
| 40-49                                            | 1.03             | 0.00    | 1.02   | 1.04  | 1.03                                               | 0.00    | 1.02   | 1.04  |
| 50-59                                            | 0.98             | 0.00    | 0.97   | 0.99  | 0.99                                               | 0.10    | 0.98   | 1.00  |
| 60-69 (reference)                                | -                | -       | -      | -     | -                                                  | -       | -      | -     |
| 70-79                                            | 1.06             | 0.00    | 1.05   | 1.07  | 1.03                                               | 0.00    | 1.02   | 1.04  |
| 80 or more                                       | 1.06             | 0.00    | 1.05   | 1.08  | 1.01                                               | 0.18    | 1.00   | 1.02  |
| <b>Sex</b>                                       |                  |         |        |       |                                                    |         |        |       |
| Female (reference)                               | -                | -       | -      | -     | -                                                  | -       | -      | -     |
| Male                                             | 0.93             | 0.00    | 0.93   | 0.94  | 1.08                                               | 0.00    | 1.07   | 1.09  |
| <b>Ethnicity category</b>                        |                  |         |        |       |                                                    |         |        |       |
| White (reference)                                | -                | -       | -      | -     | -                                                  | -       | -      | -     |
| South Asian                                      | 0.99             | 0.17    | 0.97   | 1.00  | 0.92                                               | 0.00    | 0.91   | 0.94  |
| Black                                            | 0.94             | 0.00    | 0.92   | 0.95  | 0.91                                               | 0.00    | 0.89   | 0.92  |
| Other                                            | 0.88             | 0.00    | 0.86   | 0.91  | 0.89                                               | 0.00    | 0.86   | 0.92  |
| Mixed                                            | 0.94             | 0.00    | 0.91   | 0.98  | 0.92                                               | 0.00    | 0.89   | 0.95  |
| Missing                                          | 0.96             | 0.00    | 0.95   | 0.97  | 1.05                                               | 0.00    | 1.03   | 1.06  |
| <b>IMD decile</b>                                |                  |         |        |       |                                                    |         |        |       |
| 1 (most deprived)                                | -                | -       | -      | -     | -                                                  | -       | -      | -     |
| 2                                                | 1.01             | 0.10    | 1.00   | 1.03  | 1.00                                               | 0.79    | 0.99   | 1.02  |
| 3                                                | 1.03             | 0.00    | 1.02   | 1.05  | 1.02                                               | 0.00    | 1.01   | 1.04  |
| 4                                                | 1.04             | 0.00    | 1.02   | 1.05  | 1.02                                               | 0.01    | 1.01   | 1.04  |
| 5                                                | 1.05             | 0.00    | 1.04   | 1.07  | 1.03                                               | 0.00    | 1.01   | 1.04  |
| 6                                                | 1.06             | 0.00    | 1.04   | 1.08  | 1.03                                               | 0.00    | 1.01   | 1.04  |
| 7                                                | 1.07             | 0.00    | 1.06   | 1.09  | 1.03                                               | 0.00    | 1.01   | 1.05  |
| 8                                                | 1.10             | 0.00    | 1.08   | 1.11  | 1.04                                               | 0.00    | 1.03   | 1.06  |
| 9                                                | 1.13             | 0.00    | 1.11   | 1.14  | 1.06                                               | 0.00    | 1.04   | 1.08  |
| 10 (least deprived)                              | 1.14             | 0.00    | 1.12   | 1.16  | 1.06                                               | 0.00    | 1.04   | 1.08  |
| <b>Number of QOF diseases</b>                    |                  |         |        |       |                                                    |         |        |       |
| 0 (reference)                                    | -                | -       | -      | -     | -                                                  | -       | -      | -     |
| 1                                                | 1.19             | 0.00    | 1.18   | 1.21  | 1.05                                               | 0.00    | 1.04   | 1.06  |
| 2                                                | 1.15             | 0.00    | 1.14   | 1.16  | 0.98                                               | 0.00    | 0.97   | 0.99  |
| 3                                                | 1.13             | 0.00    | 1.12   | 1.15  | 0.95                                               | 0.00    | 0.94   | 0.96  |
| 4 or more                                        | 1.16             | 0.00    | 1.14   | 1.17  | 0.93                                               | 0.00    | 0.92   | 0.94  |
| <b>Number of non-QOF diseases</b>                |                  |         |        |       |                                                    |         |        |       |
| 0 (reference)                                    | -                | -       | -      | -     | -                                                  | -       | -      | -     |
| 1                                                | 1.04             | 0.00    | 1.03   | 1.06  | 0.94                                               | 0.00    | 0.93   | 0.95  |
| 2                                                | 1.09             | 0.00    | 1.08   | 1.11  | 0.90                                               | 0.00    | 0.89   | 0.91  |
| 3                                                | 1.13             | 0.00    | 1.11   | 1.14  | 0.86                                               | 0.00    | 0.85   | 0.87  |
| 4 or more                                        | 1.21             | 0.00    | 1.20   | 1.23  | 0.80                                               | 0.00    | 0.79   | 0.81  |
| <b>Calendar year of diagnosis</b>                |                  |         |        |       |                                                    |         |        |       |
| 2015 (reference)                                 | -                | -       | -      | -     | -                                                  | -       | -      | -     |
| 2016                                             | 1.00             | 0.56    | 0.99   | 1.01  | 1.03                                               | 0.00    | 1.02   | 1.04  |
| 2017                                             | 1.00             | 0.43    | 0.99   | 1.01  | 1.06                                               | 0.00    | 1.05   | 1.07  |
| 2018                                             | 0.91             | 0.00    | 0.90   | 0.92  | 1.01                                               | 0.01    | 1.00   | 1.02  |
| 2019                                             | 0.79             | 0.00    | 0.79   | 0.80  | 0.93                                               | 0.00    | 0.92   | 0.94  |
| <b>Average number of consultations in year 1</b> |                  |         |        |       |                                                    |         |        |       |
| Less than 1 (reference)                          | -                | -       | -      | -     | -                                                  | -       | -      | -     |
| 1-2                                              |                  |         |        |       | 2.76                                               | 0.00    | 2.72   | 2.81  |
| 3-4                                              |                  |         |        |       | 4.06                                               | 0.00    | 4.00   | 4.12  |
| 5-9                                              |                  |         |        |       | 5.40                                               | 0.00    | 5.32   | 5.48  |
| 10 or more                                       |                  |         |        |       | 7.35                                               | 0.00    | 7.24   | 7.47  |

From negative binomial regression models, including practice-level fixed effects (not shown)

## References

1. Head, A. *et al.* Inequalities in incident and prevalent multimorbidity in England, 2004–2013: a population-based, descriptive study. *The Lancet Healthy Longevity* **2**, e489–e497 (2021).
2. Kuan, V. *et al.* A chronological map of 308 physical and mental health conditions from 4 million individuals in the English National Health Service. *The Lancet Digital Health* **1**, e63–e77 (2019).
3. Bisquera, A. *et al.* Inequalities in developing multimorbidity over time: A population-based cohort study from an urban, multi-ethnic borough in the United Kingdom. *Lancet Reg Health Eur* **12**, 100247 (2021).
4. Ashworth, M. *et al.* Journey to multimorbidity: longitudinal analysis exploring cardiovascular risk factors and sociodemographic determinants in an urban setting. *BMJ Open* **9**, (2019).
5. NHS Health and Social Care Information Centre. National Quality and Outcomes Framework Statistics for England 2004/05. <https://files.digital.nhs.uk/publicationimport/pub01xxx/pub01946/qof-eng-04-05-rep.pdf>.
6. Health & Social Care Information Centre. Quality and Outcomes Framework – Prevalence, Achievements and Exceptions Report. England, 2013-14. <https://files.digital.nhs.uk/publicationimport/pub15xxx/pub15751/qof-1314-report-v1.1.pdf>.
7. Health & Social Care Information Centre. Quality and Outcomes Framework – Prevalence, Achievements and Exceptions Report, England, 2014-15. <https://files.digital.nhs.uk/publicationimport/pub18xxx/pub18887/qof-1415-report%20v1.1.pdf> (2015).

**The RECORD statement – checklist of items, extended from the STROBE statement, that should be reported in observational studies using routinely collected health data.**

|                           | Item No. | STROBE items                                                                                                                                                                               | Location in manuscript where items are reported | RECORD items                                                                                                                                                                                                                                                                                                                                                                                                                                | Location in manuscript where items are reported |
|---------------------------|----------|--------------------------------------------------------------------------------------------------------------------------------------------------------------------------------------------|-------------------------------------------------|---------------------------------------------------------------------------------------------------------------------------------------------------------------------------------------------------------------------------------------------------------------------------------------------------------------------------------------------------------------------------------------------------------------------------------------------|-------------------------------------------------|
| <b>Title and abstract</b> |          |                                                                                                                                                                                            |                                                 |                                                                                                                                                                                                                                                                                                                                                                                                                                             |                                                 |
|                           | 1        | (a) Indicate the study's design with a commonly used term in the title or the abstract (b) Provide in the abstract an informative and balanced summary of what was done and what was found | p1-3                                            | RECORD 1.1: The type of data used should be specified in the title or abstract. When possible, the name of the databases used should be included.<br><br>RECORD 1.2: If applicable, the geographic region and timeframe within which the study took place should be reported in the title or abstract.<br><br>RECORD 1.3: If linkage between databases was conducted for the study, this should be clearly stated in the title or abstract. | p1<br><br>p2<br><br>N/A                         |
| <b>Introduction</b>       |          |                                                                                                                                                                                            |                                                 |                                                                                                                                                                                                                                                                                                                                                                                                                                             |                                                 |
| Background rationale      | 2        | Explain the scientific background and rationale for the investigation being reported                                                                                                       | p4-5                                            |                                                                                                                                                                                                                                                                                                                                                                                                                                             |                                                 |
| Objectives                | 3        | State specific objectives, including any prespecified hypotheses                                                                                                                           | p5                                              |                                                                                                                                                                                                                                                                                                                                                                                                                                             |                                                 |
| <b>Methods</b>            |          |                                                                                                                                                                                            |                                                 |                                                                                                                                                                                                                                                                                                                                                                                                                                             |                                                 |
| Study Design              | 4        | Present key elements of study design early in the paper                                                                                                                                    | p5                                              |                                                                                                                                                                                                                                                                                                                                                                                                                                             |                                                 |
| Setting                   | 5        | Describe the setting, locations, and relevant dates, including periods of recruitment, exposure, follow-up, and data collection                                                            | p5                                              |                                                                                                                                                                                                                                                                                                                                                                                                                                             |                                                 |

|                                                                                                                                                                                                            |          |                                                                                                                                                                                                                                                                                                                                                                                                                                                                                                                                                                                                                                                                                                                        |                             |                                                                                                                                                                                                                                                                                                                                                                                                                                                                                                                                                                                                                                                                                                      |           |
|------------------------------------------------------------------------------------------------------------------------------------------------------------------------------------------------------------|----------|------------------------------------------------------------------------------------------------------------------------------------------------------------------------------------------------------------------------------------------------------------------------------------------------------------------------------------------------------------------------------------------------------------------------------------------------------------------------------------------------------------------------------------------------------------------------------------------------------------------------------------------------------------------------------------------------------------------------|-----------------------------|------------------------------------------------------------------------------------------------------------------------------------------------------------------------------------------------------------------------------------------------------------------------------------------------------------------------------------------------------------------------------------------------------------------------------------------------------------------------------------------------------------------------------------------------------------------------------------------------------------------------------------------------------------------------------------------------------|-----------|
| <p>1<br/>2<br/>3<br/>4<br/>5<br/>6<br/>7<br/>8<br/>9<br/>10<br/>11<br/>12<br/>13<br/>14<br/>15<br/>16<br/>17<br/>18<br/>19<br/>20<br/>21<br/>22<br/>23<br/>24<br/>25<br/>26<br/>27</p> <p>Participants</p> | <p>6</p> | <p>(a) <i>Cohort study</i> - Give the eligibility criteria, and the sources and methods of selection of participants. Describe methods of follow-up<br/> <i>Case-control study</i> - Give the eligibility criteria, and the sources and methods of case ascertainment and control selection. Give the rationale for the choice of cases and controls<br/> <i>Cross-sectional study</i> - Give the eligibility criteria, and the sources and methods of selection of participants</p> <p>(b) <i>Cohort study</i> - For matched studies, give matching criteria and number of exposed and unexposed<br/> <i>Case-control study</i> - For matched studies, give matching criteria and the number of controls per case</p> | <p>p5 and appendix p2</p>   | <p>RECORD 6.1: The methods of study population selection (such as codes or algorithms used to identify subjects) should be listed in detail. If this is not possible, an explanation should be provided.</p> <p>RECORD 6.2: Any validation studies of the codes or algorithms used to select the population should be referenced. If validation was conducted for this study and not published elsewhere, detailed methods and results should be provided.</p> <p>RECORD 6.3: If the study involved linkage of databases, consider use of a flow diagram or other graphical display to demonstrate the data linkage process, including the number of individuals with linked data at each stage.</p> | <p>p5</p> |
| <p>28<br/>29<br/>30<br/>31<br/>32<br/>33<br/>34</p> <p>Variables</p>                                                                                                                                       | <p>7</p> | <p>Clearly define all outcomes, exposures, predictors, potential confounders, and effect modifiers. Give diagnostic criteria, if applicable.</p>                                                                                                                                                                                                                                                                                                                                                                                                                                                                                                                                                                       | <p>p5 and appendix p2-3</p> | <p>RECORD 7.1: A complete list of codes and algorithms used to classify exposures, outcomes, confounders, and effect modifiers should be provided. If these cannot be reported, an explanation should be provided.</p>                                                                                                                                                                                                                                                                                                                                                                                                                                                                               |           |
| <p>35<br/>36<br/>37<br/>38<br/>39<br/>40<br/>41<br/>42</p> <p>Data sources/<br/>measurement</p>                                                                                                            | <p>8</p> | <p>For each variable of interest, give sources of data and details of methods of assessment (measurement). Describe comparability of assessment methods if there is more than one group</p>                                                                                                                                                                                                                                                                                                                                                                                                                                                                                                                            | <p>p5 and appendix p2-3</p> |                                                                                                                                                                                                                                                                                                                                                                                                                                                                                                                                                                                                                                                                                                      |           |

|                                                                                                                                                    |                                  |    |                                                                                                                                                                                                                                                                                                                                                                                                                                                                                                                                                                      |      |                                                                                                                                                       |    |
|----------------------------------------------------------------------------------------------------------------------------------------------------|----------------------------------|----|----------------------------------------------------------------------------------------------------------------------------------------------------------------------------------------------------------------------------------------------------------------------------------------------------------------------------------------------------------------------------------------------------------------------------------------------------------------------------------------------------------------------------------------------------------------------|------|-------------------------------------------------------------------------------------------------------------------------------------------------------|----|
| 1<br>2<br>3<br>4                                                                                                                                   | Bias                             | 9  | Describe any efforts to address potential sources of bias                                                                                                                                                                                                                                                                                                                                                                                                                                                                                                            | p6-7 |                                                                                                                                                       |    |
| 5<br>6<br>7<br>8<br>9                                                                                                                              | Study size                       | 10 | Explain how the study size was arrived at                                                                                                                                                                                                                                                                                                                                                                                                                                                                                                                            | p8   |                                                                                                                                                       |    |
| 10<br>11<br>12<br>13<br>14<br>15<br>16<br>17<br>18<br>19<br>20<br>21<br>22<br>23<br>24<br>25<br>26<br>27<br>28<br>29<br>30<br>31<br>32<br>33<br>34 | Quantitative variables           | 11 | Explain how quantitative variables were handled in the analyses. If applicable, describe which groupings were chosen, and why                                                                                                                                                                                                                                                                                                                                                                                                                                        | P5-6 |                                                                                                                                                       |    |
| 35<br>36<br>37<br>38<br>39<br>40<br>41<br>42<br>43<br>44<br>45<br>46<br>47                                                                         | Statistical methods              | 12 | (a) Describe all statistical methods, including those used to control for confounding<br>(b) Describe any methods used to examine subgroups and interactions<br>(c) Explain how missing data were addressed<br>(d) <i>Cohort study</i> - If applicable, explain how loss to follow-up was addressed<br><i>Case-control study</i> - If applicable, explain how matching of cases and controls was addressed<br><i>Cross-sectional study</i> - If applicable, describe analytical methods taking account of sampling strategy<br>(e) Describe any sensitivity analyses | p6-7 |                                                                                                                                                       |    |
|                                                                                                                                                    | Data access and cleaning methods |    | ..                                                                                                                                                                                                                                                                                                                                                                                                                                                                                                                                                                   |      | RECORD 12.1: Authors should describe the extent to which the investigators had access to the database population used to create the study population. | p5 |

|                  |    |                                                                                                                                                                                                                                                                                                                                                 |             |                                                                                                                                                                                                                                                                                                                    |     |
|------------------|----|-------------------------------------------------------------------------------------------------------------------------------------------------------------------------------------------------------------------------------------------------------------------------------------------------------------------------------------------------|-------------|--------------------------------------------------------------------------------------------------------------------------------------------------------------------------------------------------------------------------------------------------------------------------------------------------------------------|-----|
|                  |    |                                                                                                                                                                                                                                                                                                                                                 |             | RECORD 12.2: Authors should provide information on the data cleaning methods used in the study.                                                                                                                                                                                                                    |     |
| Linkage          |    | ..                                                                                                                                                                                                                                                                                                                                              |             | RECORD 12.3: State whether the study included person-level, institutional-level, or other data linkage across two or more databases. The methods of linkage and methods of linkage quality evaluation should be provided.                                                                                          | N/A |
| <b>Results</b>   |    |                                                                                                                                                                                                                                                                                                                                                 |             |                                                                                                                                                                                                                                                                                                                    |     |
| Participants     | 13 | (a) Report the numbers of individuals at each stage of the study ( <i>e.g.</i> , numbers potentially eligible, examined for eligibility, confirmed eligible, included in the study, completing follow-up, and analysed)<br>(b) Give reasons for non-participation at each stage.<br>(c) Consider use of a flow diagram                          | p8          | RECORD 13.1: Describe in detail the selection of the persons included in the study ( <i>i.e.</i> , study population selection) including filtering based on data quality, data availability and linkage. The selection of included persons can be described in the text and/or by means of the study flow diagram. | p8  |
| Descriptive data | 14 | (a) Give characteristics of study participants ( <i>e.g.</i> , demographic, clinical, social) and information on exposures and potential confounders<br>(b) Indicate the number of participants with missing data for each variable of interest<br>(c) <i>Cohort study</i> - summarise follow-up time ( <i>e.g.</i> , average and total amount) | p8, Table 1 |                                                                                                                                                                                                                                                                                                                    |     |
| Outcome data     | 15 | <i>Cohort study</i> - Report numbers of outcome events or summary measures over time<br><i>Case-control study</i> - Report numbers in each exposure                                                                                                                                                                                             | p9-10       |                                                                                                                                                                                                                                                                                                                    |     |



|                   |    |                                                                                                                                                                                                                                                                                                                                                                                                                 |                    |                                                                                                                                                                                                                                                                                                          |     |
|-------------------|----|-----------------------------------------------------------------------------------------------------------------------------------------------------------------------------------------------------------------------------------------------------------------------------------------------------------------------------------------------------------------------------------------------------------------|--------------------|----------------------------------------------------------------------------------------------------------------------------------------------------------------------------------------------------------------------------------------------------------------------------------------------------------|-----|
|                   |    | category, or summary measures of exposure<br><i>Cross-sectional study</i> - Report numbers of outcome events or summary measures                                                                                                                                                                                                                                                                                |                    |                                                                                                                                                                                                                                                                                                          |     |
| Main results      | 16 | (a) Give unadjusted estimates and, if applicable, confounder-adjusted estimates and their precision (e.g., 95% confidence interval). Make clear which confounders were adjusted for and why they were included<br>(b) Report category boundaries when continuous variables were categorized<br>(c) If relevant, consider translating estimates of relative risk into absolute risk for a meaningful time period | p9-14, Figures 1-3 |                                                                                                                                                                                                                                                                                                          |     |
| Other analyses    | 17 | Report other analyses done— e.g., analyses of subgroups and interactions, and sensitivity analyses                                                                                                                                                                                                                                                                                                              | p11                |                                                                                                                                                                                                                                                                                                          |     |
| <b>Discussion</b> |    |                                                                                                                                                                                                                                                                                                                                                                                                                 |                    |                                                                                                                                                                                                                                                                                                          |     |
| Key results       | 18 | Summarise key results with reference to study objectives                                                                                                                                                                                                                                                                                                                                                        | p15                |                                                                                                                                                                                                                                                                                                          |     |
| Limitations       | 19 | Discuss limitations of the study, taking into account sources of potential bias or imprecision. Discuss both direction and magnitude of any potential bias                                                                                                                                                                                                                                                      | p17                | RECORD 19.1: Discuss the implications of using data that were not created or collected to answer the specific research question(s). Include discussion of misclassification bias, unmeasured confounding, missing data, and changing eligibility over time, as they pertain to the study being reported. | p17 |
| Interpretation    | 20 | Give a cautious overall interpretation of results considering objectives,                                                                                                                                                                                                                                                                                                                                       | p15, p17-18        |                                                                                                                                                                                                                                                                                                          |     |

|                                                           |    |                                                                                                                                                               |     |                                                                                                                                                          |     |
|-----------------------------------------------------------|----|---------------------------------------------------------------------------------------------------------------------------------------------------------------|-----|----------------------------------------------------------------------------------------------------------------------------------------------------------|-----|
|                                                           |    | limitations, multiplicity of analyses, results from similar studies, and other relevant evidence                                                              |     |                                                                                                                                                          |     |
| Generalisability                                          | 21 | Discuss the generalisability (external validity) of the study results                                                                                         | p17 |                                                                                                                                                          |     |
| <b>Other Information</b>                                  |    |                                                                                                                                                               |     |                                                                                                                                                          |     |
| Funding                                                   | 22 | Give the source of funding and the role of the funders for the present study and, if applicable, for the original study on which the present article is based | p18 |                                                                                                                                                          |     |
| Accessibility of protocol, raw data, and programming code |    | ..                                                                                                                                                            |     | RECORD 22.1: Authors should provide information on how to access any supplemental information such as the study protocol, raw data, or programming code. | p18 |

\*Reference: Benchimol EI, Smeeth L, Guttman A, Harron K, Moher D, Petersen I, Sørensen HT, von Elm E, Langan SM, the RECORD Working Committee. The REporting of studies Conducted using Observational Routinely-collected health Data (RECORD) Statement. *PLoS Medicine* 2015; in press.

\*Checklist is protected under Creative Commons Attribution ([CC BY](https://creativecommons.org/licenses/by/4.0/)) license.

# BMJ Open

## Identifying potential biases in code sequences in primary care electronic healthcare records: a retrospective cohort study of the determinants of code frequency

|                                 |                                                                                                                                                                                                                                                                                                                                                                                                                                                                                                                                                                                                                                                                                                                                                                                                                                                                   |
|---------------------------------|-------------------------------------------------------------------------------------------------------------------------------------------------------------------------------------------------------------------------------------------------------------------------------------------------------------------------------------------------------------------------------------------------------------------------------------------------------------------------------------------------------------------------------------------------------------------------------------------------------------------------------------------------------------------------------------------------------------------------------------------------------------------------------------------------------------------------------------------------------------------|
| Journal:                        | <i>BMJ Open</i>                                                                                                                                                                                                                                                                                                                                                                                                                                                                                                                                                                                                                                                                                                                                                                                                                                                   |
| Manuscript ID                   | bmjopen-2023-072884.R2                                                                                                                                                                                                                                                                                                                                                                                                                                                                                                                                                                                                                                                                                                                                                                                                                                            |
| Article Type:                   | Original research                                                                                                                                                                                                                                                                                                                                                                                                                                                                                                                                                                                                                                                                                                                                                                                                                                                 |
| Date Submitted by the Author:   | 31-Aug-2023                                                                                                                                                                                                                                                                                                                                                                                                                                                                                                                                                                                                                                                                                                                                                                                                                                                       |
| Complete List of Authors:       | <p>Beaney, Thomas; Imperial College London, Department of Primary Care and Public Health; Imperial College London, Department of Mathematics</p> <p>Clarke, Jonathan; Imperial College of Science Technology and Medicine, Institute of Global Health Innovation</p> <p>Salman, David; Imperial College London Department of Primary Care and Public Health; Imperial College London Faculty of Medicine, MSk lab</p> <p>Woodcock, Thomas; Imperial College London, Department of Primary Care and Public Health</p> <p>Majeed, Azeem; Imperial College London, Department of Primary Care and Public Health</p> <p>Barahona, Mauricio; Imperial College London, Centre for Mathematics of Precision Healthcare; Imperial College London, Department of Mathematics</p> <p>Aylin, Paul; Imperial College London, Department of Primary Care and Public Health</p> |
| <b>Primary Subject Heading</b>: | Health informatics                                                                                                                                                                                                                                                                                                                                                                                                                                                                                                                                                                                                                                                                                                                                                                                                                                                |
| Secondary Subject Heading:      | General practice / Family practice, Health informatics, Health services research, Epidemiology                                                                                                                                                                                                                                                                                                                                                                                                                                                                                                                                                                                                                                                                                                                                                                    |
| Keywords:                       | EPIDEMIOLOGY, Primary Health Care, Health informatics < BIOTECHNOLOGY & BIOINFORMATICS, STATISTICS & RESEARCH METHODS                                                                                                                                                                                                                                                                                                                                                                                                                                                                                                                                                                                                                                                                                                                                             |
|                                 |                                                                                                                                                                                                                                                                                                                                                                                                                                                                                                                                                                                                                                                                                                                                                                                                                                                                   |

SCHOLARONE™  
Manuscripts



I, the Submitting Author has the right to grant and does grant on behalf of all authors of the Work (as defined in the below author licence), an exclusive licence and/or a non-exclusive licence for contributions from authors who are: i) UK Crown employees; ii) where BMJ has agreed a CC-BY licence shall apply, and/or iii) in accordance with the terms applicable for US Federal Government officers or employees acting as part of their official duties; on a worldwide, perpetual, irrevocable, royalty-free basis to BMJ Publishing Group Ltd ("BMJ") its licensees and where the relevant Journal is co-owned by BMJ to the co-owners of the Journal, to publish the Work in this journal and any other BMJ products and to exploit all rights, as set out in our [licence](#).

The Submitting Author accepts and understands that any supply made under these terms is made by BMJ to the Submitting Author unless you are acting as an employee on behalf of your employer or a postgraduate student of an affiliated institution which is paying any applicable article publishing charge ("APC") for Open Access articles. Where the Submitting Author wishes to make the Work available on an Open Access basis (and intends to pay the relevant APC), the terms of reuse of such Open Access shall be governed by a Creative Commons licence – details of these licences and which [Creative Commons](#) licence will apply to this Work are set out in our licence referred to above.

Other than as permitted in any relevant BMJ Author's Self Archiving Policies, I confirm this Work has not been accepted for publication elsewhere, is not being considered for publication elsewhere and does not duplicate material already published. I confirm all authors consent to publication of this Work and authorise the granting of this licence.

1  
2  
3 **Identifying potential biases in code sequences in primary care electronic healthcare**  
4 **records: a retrospective cohort study of the determinants of code frequency**  
5  
6  
7

8 Beaney T<sup>1,2</sup> (0000-0001-9709-7264), Clarke J<sup>2</sup>, Salman D<sup>1,3</sup>, Woodcock T<sup>1</sup>, Majeed A<sup>1</sup>,  
9 Barahona M<sup>2</sup>, Aylin P<sup>1</sup>  
10  
11

- 12  
13  
14 1. Department of Primary Care and Public Health, Imperial College London, London,  
15 W6 8RP, United Kingdom  
16  
17 2. Centre for Mathematics of Precision Healthcare, Department of Mathematics,  
18 Imperial College London, London, SW7 2AZ, United Kingdom  
19  
20 3. MSk Lab, Department of Surgery and Cancer, Faculty of Medicine, Imperial College  
21 London, London, UK  
22  
23  
24

25  
26 Corresponding Author:

27 Dr Thomas Beaney

28  
29 Department of Primary Care and Public Health, Imperial College London, London, W6 8RP,  
30 United Kingdom  
31

32 Email: [thomas.beaney@imperial.ac.uk](mailto:thomas.beaney@imperial.ac.uk)  
33  
34  
35  
36  
37  
38  
39  
40  
41  
42  
43  
44  
45  
46  
47  
48  
49  
50  
51  
52  
53  
54  
55  
56  
57  
58  
59  
60

## Abstract

### Objectives

To determine whether the frequency of diagnostic codes for long-term conditions (LTCs) in primary care electronic health records (EHRs) is associated with i) disease coding incentives, ii) GP practice, iii) patient socio-demographic characteristics and iv) calendar year of diagnosis.

### Design

Retrospective cohort study.

### Setting

General practices in England from 2015 to 2022 contributing to the Clinical Practice Research Datalink Aurum dataset.

### Participants

All patients registered to a GP with at least one incident LTC diagnosed between 01/01/2015 and 31/12/2019.

### Primary and secondary outcome measures

The number of diagnostic codes for an LTC in i) the first and ii) the second year following diagnosis, stratified by inclusion in the Quality and Outcomes Framework (QOF) financial incentive programme.

### Results

3,113,724 patients were included, with 7,723,365 incident LTCs. Conditions included in QOF had higher rates of annual coding than conditions not included in QOF (1.03 vs 0.32 per year,  $p < 0.0001$ ). There was significant variation in code frequency by GP practice which was not explained by patient socio-demographics. We found significant associations with patient socio-demographics, with a trend towards lower coding rates in people living in areas of higher deprivation for both QOF and non-QOF conditions. Code frequency was lower for conditions with follow-up time in 2020, associated with the onset of the COVID-19 pandemic.

### Conclusions

The frequency of diagnostic codes for newly diagnosed LTCs is influenced by factors including patient socio-demographics, disease inclusion in QOF, GP practice, and the impact of the COVID-19 pandemic. Natural language processing or other methods using temporally-ordered code sequences should account for these factors to minimise potential bias.

### Strengths and limitations

- This study used a large and representative sample of patients in England, including 3 million patients with one of 208 incident diseases developed over 5 years.
- We focussed on incident diseases during the study period to minimise bias from historic or inactive diseases.
- We found significant differences in the frequency of codes according to patient socio-demographics, GP practice, and disease inclusion in QOF, but could not determine whether these differences reflect differences in healthcare utilisation versus coding quality.

## Background

Methods developed in natural language processing (NLP) are increasingly being employed to analyse routinely collected healthcare data, such as data recorded in the Electronic Healthcare Record (EHR).(1–6) These methods show promise across a range of tasks, including prediction of health outcomes,(1,5,6) and clustering of co-occurring diseases.(2) Although developed for the analysis of language data, such as the free text data found in ‘unstructured’ medical records, NLP methods can also be applied to coded or ‘structured’ data found in many EHR databases. Using structured data, disease codes arranged in a temporal sequence in a patient’s EHR history can be considered analogous to words in a sentence or document.(5)

In primary care EHRs, diagnostic codes may be entered either during a consultation, or entered outside, such as on receiving communication of a new diagnosis from hospital, or retrospectively coding a pre-existing diagnosis. In predictive modelling scenarios, such as those used in NLP, codes from both sources are relevant to understanding a patient’s health status. However, a potential problem facing sequence-based methods is the extent to which repeated codes are an objective marker of a patient’s health status and a presentation with a particular condition or relate to the quality of coding in the EHR.(7) Although previous studies of EHR data in England have shown the prevalence of many long-term conditions (LTCs) to be comparable to those from national statistics, these are often calculated based on the presence of a single diagnostic code.(8) Whether repeated codes for LTCs are entered in the EHR subsequently may be determined by a range of factors, including patient characteristics, clinician incentives and organisational policies, which may vary over time.(9,10)

Unlike in secondary care, where diagnostic coding directly impacts on payments, General Practice in England receives funding primarily through capitated payments based on the size of the registered population(11) with no direct financial incentive for code entry during a consultation. However, around 10% of funding comes from the Quality and Outcomes Framework (QOF), introduced in the National Health Service for GPs in 2004.(11) QOF provides financial incentives for meeting targets for a set of chronic conditions, including regular clinical reviews, and has been credited with improvements to data collection for these conditions.(12–14) Codes for conditions in QOF may occur more frequently than for



1  
2  
3 conditions not included in the incentive scheme, which could affect sequence-based methods  
4 using recurrent codes.  
5  
6  
7

8 Analytical methods using temporally-ordered code sequences in the EHR may therefore be  
9 susceptible to biases in the frequency of codes entered following diagnosis, potentially  
10 resulting in models representing some people better than others. Awareness of the factors  
11 influencing the frequency of codes may help researchers using NLP methods by informing  
12 adjustment or sensitivity analyses. This study aims firstly to compare the frequency of  
13 repeated codes after diagnosis for a common set of LTCs. Secondly, we aim to determine  
14 whether the frequency of codes varies according to i) disease inclusion in QOF, ii) GP  
15 practice, iii) patient socio-demographic characteristics, and iv) calendar year of diagnosis.  
16  
17  
18  
19  
20  
21  
22  
23  
24  
25

## 26 **Methods**

### 27 **Data source**

28  
29 This study used data from the Clinical Practice Research Datalink (CPRD) Aurum dataset,  
30 which contains primary care data for GP practices using EMIS Web software.(15) We  
31 included all patients assessed by CPRD to be research acceptable (meeting certain quality  
32 criteria such as a valid registration date and date of birth(16)) with a continuous period of  
33 registration at a GP practice in CPRD between 1<sup>st</sup> January 2014 and 31<sup>st</sup> December 2020 (i.e.  
34 without having deregistered in this period).(17) Patients were eligible if aged 18 years or over  
35 with at least one incident disease diagnosed between 1<sup>st</sup> January 2015 and 31<sup>st</sup> December  
36 2019, allowing for at least one full year of practice registration before disease diagnosis and  
37 at least one full year of follow-up for each condition. Demographic data included age, sex,  
38 ethnicity and Index of Multiple Deprivation (IMD) of the area in which the patient resided,  
39 grouped into deciles where 1 is the most deprived and 10 the least deprived.(18) Ethnicity is  
40 recorded as one of five categories, with recording in CPRD found previously to have high  
41 concordance with national estimates.(19) We focussed on incident diseases to reduce the  
42 potential for confounding from historic conditions, some of which may no longer be active.  
43 Patients were followed up until the earliest of death, de-registration or the date of latest data  
44 extraction from their GP practice. Further information on the cohort structure is given in the  
45 appendix (p2).  
46  
47  
48  
49  
50  
51  
52  
53  
54  
55  
56  
57  
58  
59  
60

## Disease definitions

Diagnostic codes were extracted from the CPRD ‘Observation’ table and codes recorded during or outside of consultations were included. The date that the event occurred (‘obsdate’) was used, in preference to the date the code was entered. We included a total of 208 LTCs. These were defined based on a set of disease codes from Head *et al* (2021), who selected 211 chronic conditions from 308 acute and chronic disease phenotypes developed for the CALIBER study.(20,21) We reviewed codes and made changes to the code-lists for diabetes and added a new condition of ‘chronic primary pain’ (see appendix p2-3). In CALIBER, conditions related to raised cholesterol or triglycerides are based only on laboratory results, rather than diagnostic disease codes. We excluded these conditions given that laboratory measurements may have different characteristics of coding frequency. Likewise, for obesity and Chronic Kidney Disease, we used the diagnostic codes included in the code lists, but did not include BMI and eGFR measurements. We considered a single code as diagnostic for each condition and defined the diagnosis date for each condition as the date of the earliest code for that condition. Diseases were stratified according to whether they appeared in QOF by two primary care clinicians, TB and DS (see appendix p2-3).

## Statistical analysis

### Descriptive statistics

For each disease newly diagnosed during the study period, we calculated the yearly number of subsequent codes (excluding the first code representing diagnosis) during follow-up:

$$y_i = \frac{\sum_{j=1}^N c_{i,j}}{\sum_{j=1}^N f_{i,j}}$$

where  $y_i$  is the yearly number of codes following diagnosis for condition  $i$ ,  $c_{i,j}$  is the count of codes for condition  $i$  in patient  $j$ , and  $f_{i,j}$  is the number of years of follow-up for condition  $i$  in patient  $j$ . T-tests were used to compare the mean yearly number of codes for QOF versus non-QOF conditions.

To examine variation in disease coding frequency by GP practice, we calculated, for each practice  $k$ , the mean number of codes per year for newly diagnosed diseases,  $p_k$ :

$$p_k = \frac{\sum_{j=1}^N \sum_{i=1}^M c_{i,j,k}}{\sum_{j=1}^N \sum_{i=1}^M f_{i,j,k}}$$

where  $c_{i,j,k}$  is the count of codes for condition  $i$  in patient  $j$  in practice  $k$ , and  $f_{i,j,k}$  is the number of years of follow-up for condition  $i$  in patient  $j$  in practice  $k$ . We then calculated the Pearson correlation coefficient between the mean number of codes per year in each practice for QOF versus non-QOF conditions. We also compared the mean number of yearly codes in each practice stratified by the 2019 IMD decile of the GP practice. For conditions with at least two years of follow-up after the date of diagnosis, we calculated the ratio of the number of codes in the first year of diagnosis to the number of codes in subsequent years.

### Regression analyses

Data were formatted as panel data with patients measured over multiple calendar years (appendix Table A1). We used mixed effects negative binomial regression to analyse the association between code frequency of newly diagnosed conditions in i) the first year following diagnosis and ii) the second year following diagnosis, with patient factors and calendar year of diagnosis. We separated the outcome variable (code frequency) into first and second year after diagnosis due to preliminary analyses indicating significant differences over time. We also stratified the regression analyses by QOF inclusion, given our hypothesis that it may be an effect modifier of the relationships. To account for cases where a patient may have more than one QOF or non-QOF condition diagnosed within the same year, we averaged the code frequency for all newly diagnosed QOF or non-QOF conditions in each calendar year.

Included as covariates in the model were patient socio-demographic factors including age, sex, ethnicity and IMD decile of residence. We also included the count of QOF and non-QOF conditions for each patient. Due to small numbers, we excluded patients with gender recorded in CPRD as 'indeterminate' or with missing IMD deciles. Age and the count of QOF and non-QOF conditions were time-updated at the start of each calendar year, and other covariates were held fixed. We incorporated random effects for patient and fixed effects for calendar year as we wished to explicitly model the effect of time. Use of a Poisson model was considered, but the conditional variance was found to be significantly higher than the conditional mean ( $p < 0.001$ ) indicating a negative binomial to have better fit. (22) Model fit

1  
2  
3 was assessed by calculating randomized quantile residuals, which indicated no departure  
4 from normality on quantile-quantile plots.(23,24)  
5  
6  
7

8 For each regression model, we calculated the predicted count of disease codes for each  
9 patient per year and then calculated the mean for each GP practice. This indicated that  
10 significant variation remained in the mean counts according to GP practice (appendix Figure  
11 A1). We therefore incorporated fixed effects for GP practice within the regression models to  
12 account for practice-level variation (see appendix p5 for model equation). We also compared  
13 the Akaike Information Criteria (AIC) of models with and without practice fixed effects.  
14  
15  
16  
17  
18  
19

20 To assess whether code frequency was a function of overall number of primary care  
21 consultations, we conducted a sensitivity analysis including average number of yearly  
22 consultations (irrespective of condition) in year 1 or year 2 added as a covariate into the main  
23 regression models (categorised into <1, 1-2, 3-4, 5-9 or 10 or more). Python version 3.10.6  
24 and Pandas version 1.4.3 were used in data processing and plots and Stata version 17.0 and R  
25 studio version 4.2.1 were used for regression analyses.  
26  
27  
28  
29  
30  
31

### 32 **Patient and Public Involvement**

33 This research programme is supported by a patient and public advisory group who fed back  
34 to the researchers on the diseases included in the study but were not directly involved in this  
35 study.  
36  
37  
38  
39  
40  
41  
42  
43  
44  
45  
46  
47  
48  
49  
50  
51  
52  
53  
54  
55  
56  
57  
58  
59  
60

## Results

A total of 6,174,115 patients aged 18 years or over and with a continuous registration period between 1<sup>st</sup> January 2014 and 31<sup>st</sup> December 2020 were eligible for inclusion in the study. Of these, 3,113,724 (50.4%) had at least one incident disease diagnosed between 1<sup>st</sup> January 2015 and 31<sup>st</sup> December 2019. Characteristics of the eligible population are shown in Table 1. 21.4% of patients were aged between 18-40 years as of the study start date, and 7.0% were aged 80 years or over. There were more women than men (54.1% versus 45.9%), most (76.7%) were of White ethnicity and there were relatively more patients in more deprived IMD deciles (51.7% in the most deprived half). Of patients with pre-existing conditions developed before the study start date, 31.6% had one or more QOF conditions, and 71.3% had one or more non-QOF conditions. Hypertension was the most prevalent pre-existing condition (24.1%), and the frequency of all pre-existing conditions are shown in the appendix Table A2. The 3,060,391 patients who were not eligible (as they did not develop an incident disease over the study period), were more likely to be younger and more likely to be male than those eligible (appendix Table A3).

**Table 1: Socio-demographic characteristics of patients included in the study**

| Patient characteristic                  | Total          | Percent |
|-----------------------------------------|----------------|---------|
| <b>Age (years)</b>                      |                |         |
| 18-39                                   | 665543         | 21.4%   |
| 40-49                                   | 562934         | 18.1%   |
| 50-59                                   | 604284         | 19.4%   |
| 60-69                                   | 585062         | 18.8%   |
| 70-79                                   | 476626         | 15.3%   |
| 80+                                     | 219275         | 7.0%    |
| <b>Gender</b>                           |                |         |
| Female                                  | 1684942        | 54.1%   |
| Male                                    | 1428734        | 45.9%   |
| Indeterminate                           | 48             | <0.1%   |
| <b>Ethnicity</b>                        |                |         |
| White                                   | 2388332        | 76.7%   |
| South Asian                             | 194477         | 6.2%    |
| Black                                   | 103504         | 3.3%    |
| Other                                   | 36430          | 1.2%    |
| Mixed                                   | 27572          | 0.9%    |
| Missing                                 | 363409         | 11.7%   |
| <b>IMD decile</b>                       |                |         |
| 1 (most deprived)                       | 358948         | 11.5%   |
| 2                                       | 320042         | 10.3%   |
| 3                                       | 320340         | 10.3%   |
| 4                                       | 323782         | 10.4%   |
| 5                                       | 287114         | 9.2%    |
| 6                                       | 303798         | 9.8%    |
| 7                                       | 304044         | 9.8%    |
| 8                                       | 298185         | 9.6%    |
| 9                                       | 305563         | 9.8%    |
| 10 (least deprived)                     | 290214         | 9.3%    |
| Missing                                 | 1694           | 0.1%    |
| <b>Pre-existing QOF conditions*</b>     |                |         |
| 0                                       | 2130680        | 68.4%   |
| 1                                       | 393905         | 12.7%   |
| 2                                       | 224147         | 7.2%    |
| 3                                       | 142104         | 4.6%    |
| 4 or more                               | 222888         | 7.2%    |
| <b>Pre-existing non-QOF conditions*</b> |                |         |
| 0                                       | 893765         | 28.7%   |
| 1                                       | 561300         | 18.0%   |
| 2                                       | 506053         | 16.3%   |
| 3                                       | 386912         | 12.4%   |
| 4 or more                               | 765694         | 24.6%   |
| <b>Total</b>                            | <b>3113724</b> |         |

\* Pre-existing conditions defined as of study start date

### Code frequency by disease and by time from diagnosis

A total of 7,723,365 diseases were diagnosed during the study period with follow-up times for each disease ranging from 1.0 to 7.2 years (mean 4.1 years). There was substantial variation in the yearly code frequency after diagnosis for each condition diagnosed during the study period. Diabetes (types 1, 2 and unspecified), polymyalgia rheumatica, motor neurone disease and dementia had the highest median number of codes per year (appendix Table A4). For many chronic diseases, yearly code frequency was low, for example, only 5% of patients with spina bifida had  $\geq 0.5$  codes per year. Conditions included in QOF on average had significantly higher mean number of yearly codes (1.03) than conditions not included in QOF (0.32;  $p < 0.0001$ ).

The number of codes was higher in the first year after diagnosis than in subsequent years for almost all conditions, except for secondary bowel or pleural malignancy and diabetic eye disease, for which code frequency was higher on average after the first year of diagnosis. QOF conditions on average had lower ratios of codes in the first compared to subsequent years than non-QOF conditions (4.8 versus 5.7 times higher in year 1). However, diseases representing major cardiovascular events, such as myocardial infarction, were coded much more frequently in the first year from diagnosis than in subsequent years (appendix Figure A2 and Figure A3).

### Variation in coding frequency by GP practice

There was a wide range in the mean yearly number of codes per condition between GP practices, with higher code frequency for QOF compared to non-QOF conditions (appendix Figure A4). There was a strong correlation ( $r = 0.88$ ) between GP practice mean code frequency for QOF and non-QOF conditions, indicating that those practices with high code frequency for QOF conditions also had high code frequency for non-QOF conditions (Figure 1). There was no observed trend according to the GP practice-level IMD decile (appendix Figure A5).

**Figure 1: Scatterplot of mean yearly number of codes following diagnosis for QOF versus non-QOF conditions for each GP practice**

1  
2  
3 We calculated the expected counts of codes for new diseases in year 1 and year 2 following  
4 diagnosis, predicted from negative binomial regression models. Expected mean counts per  
5 condition at GP practice level showed substantially less variation compared to the observed  
6 mean counts for both QOF and non-QOF conditions in year 1 and year 2 (appendix Figure  
7 A1) indicating substantial residual practice level variation independent of patient socio-  
8 demographic factors.  
9  
10  
11  
12  
13  
14  
15  
16

### 17 **Variation in disease frequency by socio-demographics and over time**

18 We found significant associations between code frequency in year 1 and year 2 following  
19 diagnosis with patient socio-demographic factors and calendar year of diagnosis for both  
20 QOF and non-QOF diseases from mixed effects negative binomial regression, after  
21 adjustment for number of pre-existing conditions (Figures 2 and 3, and appendix Tables A5 –  
22 A8). Inclusion of GP practice fixed effects in the regression models resulted in very similar  
23 coefficients for patient sociodemographic factors, and a significantly lower AIC indicating  
24 better model fit and so results are presented including practice-level effects.  
25  
26  
27  
28  
29  
30  
31

#### 32 Associations with QOF conditions

33 Younger patients tended to have a higher frequency of codes in the first year following  
34 diagnosis compared to older patients (Figure 1). However, in the second year from diagnosis,  
35 there was a U-shaped relationship with age, with the youngest and oldest age groups having  
36 the lowest rate of codes. Males had on average a small 3% increase (95% CI: 1.03 – 1.03) in  
37 the incidence rate of codes in year 1 and 11% (95% CI: 1.11 – 1.12) increase in year 2  
38 compared with females. There was a strong relationship with ethnicity, with people of non-  
39 White ethnicities having lower rates of code frequency than people of White ethnicity in year  
40 1, but higher rates in year 2. There was a strong trend towards higher code frequency in year  
41 1 and year 2 with decreasing levels of deprivation.  
42  
43  
44  
45  
46  
47  
48  
49  
50

#### 51 Associations with non-QOF conditions

52 For conditions not included in QOF, relationships were more consistent across year 1 and  
53 year 2 following diagnosis (Figure 2). The 18–40-year age group had the highest rate of  
54 codes in both year 1 and year 2, with only small differences between other age groups. There  
55 was no difference in the rate of codes in males and females in year 1, but males had a lower  
56 rate of codes in year 2. Lower rates of codes were found in people of non-White ethnicities  
57  
58  
59  
60



1  
2  
3 compared to people of White ethnicity, except for South Asian ethnicity in year 2. Similar to  
4 QOF conditions, there was a strong trend towards higher code rates in year 1 and year 2 with  
5 decreasing deprivation.  
6  
7  
8  
9

#### 10 Associations with calendar year

11 For both QOF and non-QOF conditions, code rates were similar for conditions diagnosed in  
12 2016 and 2017 compared with 2015 (Figures 1 and 2). For codes in year 1, rates for  
13 conditions diagnosed in 2018 were similar to 2015, but rates for diseases diagnosed in 2019  
14 were 5% and 6% lower than 2015 for QOF and non-QOF conditions, respectively. For codes  
15 in year 2, rates were significantly lower in 2018 (9% and 9% lower for QOF and non-QOF,  
16 respectively) and 2019 (21% and 21% lower for QOF and non-QOF, respectively) compared  
17 to 2015.  
18  
19  
20  
21  
22  
23  
24  
25

#### 26 Adjustment for total number of consultations

27 A sensitivity analysis was used to adjust for total number of consultations in year 1 or year 2  
28 from diagnosis (Tables A5-A8). Total number of consultations in each year were strongly  
29 linked to the rate of codes. For newly diagnosed QOF conditions, the associations with age,  
30 sex and ethnicity in years 1 and 2 remained significant after adjustment (Tables A5-A6).  
31 However, the association with deprivation was attenuated, although there remained an  
32 association with higher rates of codes with lower deprivation in year 2. For newly diagnosed  
33 non-QOF conditions, after adjustment for consultations, age and ethnicity remained  
34 significantly associated, but males had significantly higher rates of codes than females  
35 (Tables A7-A8). Associations with deprivation were attenuated, but there remained a small  
36 but significant association in year 2.  
37  
38  
39  
40  
41  
42  
43  
44  
45

46 **Figure 2: Associations of rate of codes in year one and year two following diagnosis with**  
47 **patient characteristics and calendar year, for conditions included in the Quality and**  
48 **Outcomes Framework (QOF)**  
49  
50  
51

52 **Figure 3: Associations of rate of codes in year one and year two following diagnosis with**  
53 **patient characteristics and calendar year, for conditions not included in the Quality and**  
54 **Outcomes Framework (QOF)**  
55  
56  
57  
58  
59  
60

## Discussion

With an increased use of NLP methods incorporating temporally-ordered code sequences in the primary care EHR, we need to better understand the structure and frequency of repeated occurrences of diagnostic codes. Our study demonstrates significant associations in the frequency of codes for newly diagnosed conditions according to patient socio-demographic factors, GP practice, disease inclusion in QOF, and calendar year. We are unable to fully assess the extent to which the relationships in our study are explained by the quality of coding, or by how patients use healthcare services for a particular condition. However, a sensitivity analysis adjusting for total number of yearly consultations per patient yielded similar results, suggesting that variation in coding quality is likely to play a role. Our findings have implications for researchers using code sequences, emphasising the importance of considering these factors as potential sources of bias.

### Patient socio-demographics

Patient characteristics including age, sex and ethnicity were strongly linked to code frequency, although associations were inconsistent across QOF and non-QOF conditions, and for QOF conditions, were not consistent across the first and second year from diagnosis. People of non-White ethnicity, for example, had lower code rates for QOF conditions in year 1, but higher in year 2, compared to people of White ethnicity. We found consistent patterns with deprivation, with lower code frequency in people living in more deprived areas. A sensitivity analysis adjusting for total number of consultations attenuated the association with deprivation, suggesting that the relationship of code frequency with deprivation was partially explained by total primary care contacts. These findings likely point to differences in the mix of conditions between patient groups, healthcare seeking behaviours, or access to care. For example, people living in areas of socio-economic deprivation may be less likely to attend for screening, preventive care and ongoing management of chronic diseases. Previous research also suggests that although rates of appointments are similar across deciles of socioeconomic deprivation,<sup>(25)</sup> the rate of missed appointments increases and consultation length decreases with increasing deprivation, which may impact on code frequency for these groups, rather than indicating differences in healthcare need.<sup>(26,27)</sup>

### GP practice

Substantial variation was found in the frequency of codes between GP practices, which persisted after accounting for differences in patient mix in terms of age, sex, deprivation,

1  
2  
3 ethnicity, number of chronic conditions and in year of diagnosis. Although this may indicate  
4 unmeasured confounding in the characteristics of patients between practices, it likely  
5 represents policies and practices that influence coding which vary between organisations and  
6 clinicians.(9) For example, some GP practices may be more rigorous about coding data in  
7 clinical consultations and in correspondence from specialist services on diagnoses made in  
8 secondary care. Previous research has suggested that clinicians are more similar to those in  
9 the same practice than they are to clinicians in different practices with respect to treatment  
10 and diagnostic decisions.(28) Variation between clinicians in coding practices is likely to be  
11 significant both within and between practices, but this information was not accessible for the  
12 study, and its analysis would introduce multiple hierarchical dependencies outside the scope  
13 of this work. Future work could consider individual clinician effects on coding practices in  
14 the EHR.  
15  
16  
17  
18  
19  
20  
21  
22  
23  
24  
25

### 26 QOF and non-QOF conditions

27 Code frequency was significantly higher for conditions included in QOF compared to  
28 conditions not included. Previous research has highlighted changes to policies and procedures  
29 within GP practices to meet targets, including improved disease registries, which may lead to  
30 an increased likelihood of a code being entered for a given condition. We found substantial  
31 variation between GP practices in the mean code frequency for QOF conditions, but  
32 interestingly, this was strongly correlated ( $r=0.88$  and Figure 1) with code frequency for non-  
33 QOF conditions, suggesting that practice-level effects impact on coding across all conditions,  
34 rather than specifically those incentivised by QOF. However, it is not possible in our study to  
35 determine whether differences in code frequency between QOF and non-QOF conditions are  
36 explained by greater healthcare need or an increased number of healthcare contacts for QOF  
37 conditions, or are explained by higher likelihood of a condition being coded when a patient  
38 presents.  
39  
40  
41  
42  
43  
44  
45  
46  
47  
48  
49

### 50 Calendar year

51 Accounting for calendar time in analyses of patient trajectories is a methodological concern,  
52 as the further back in time in the medical record, particularly before the advent of the EHR  
53 and QOF, the greater the chance that coding practices, and even disease categories, vary.(29)  
54 Although our study started relatively recently in 2015, and we cannot infer code frequency  
55 before this time, we found consistency in code frequency over a short time-span from 2015-  
56 2017. The decline in year 1 codes in 2019, and year 2 codes in 2018 and 2019 likely relates to  
57  
58  
59  
60

1  
2  
3 the impact of the COVID-19 pandemic which impacted significantly on health services in  
4 England from March 2020.(30) Previous studies have shown reductions in patients presenting  
5 with particular conditions, and a reduction in appointment numbers in primary and secondary  
6 healthcare in England. Analyses reliant on coding frequency should therefore consider using  
7 calendar year in addition to patient age in modelling patient trajectories, or limiting analyses  
8 to defined time period.  
9  
10  
11  
12  
13

### 14 15 **Strengths and limitations**

16 A strength of our study is the inclusion of a large number of patients from a representative  
17 sample of primary care in England which makes our findings generalisable to the national  
18 population.(15) We included only patients with newly incident diseases to minimise potential  
19 confounding from diseases diagnosed historically, some of which might no longer be active.  
20 We also only included patients with continuous follow-up over the study period and with at  
21 least one year of full practice registration to reduce bias from overestimation of incidence  
22 immediately following registration.(17) We also excluded patients who died less than one  
23 year from a new diagnosis, which may impact on disease frequency estimates for disease  
24 which have poor survival. We considered using annualised rates for those with less than a full  
25 year of follow-up, but this resulted in very high annualised counts for some individuals with  
26 short follow-up and might introduce additional bias if patients were to seek out care in  
27 advance of re-registering at another GP practice.  
28  
29  
30  
31  
32  
33  
34  
35  
36  
37  
38

39 Our study has focussed on structured healthcare data, whereas much of the consultation is  
40 recorded as unstructured 'free-text'.(7) Although unstructured primary care data contains  
41 much richer information on the details of a presentation that may not be fully reflected in the  
42 coded entries, this information is not currently available from CPRD, but research in future  
43 could examine the agreement between structured and unstructured primary care EHR data.  
44 This would allow a more robust estimation of the content and diseases covered during a  
45 consultation. We stratified conditions according to QOF status given our hypothesis that it  
46 may influence coding frequency. However, we also found variation within categories; for  
47 example, polymyalgia rheumatica and motor neurone disease, which are not included in  
48 QOF, had high number of yearly codes, whereas cardiovascular events such as Transient  
49 Ischaemic Attack, included in QOF, had low yearly codes. Given the general, comparative  
50 nature of this paper, and its aim to examine relationships over many conditions, a condition-  
51 specific analysis of coding frequency was out of scope.  
52  
53  
54  
55  
56  
57  
58  
59  
60

## Implications for research

Our findings have implications for researchers using code sequences recorded in primary care structured data. The frequency of repeated diagnostic codes relates to patient and condition-specific factors, coding incentives and practice-level factors. Although we cannot determine if these findings represent disease burden and healthcare need, it is likely that biases in coding operate at various levels. Specific approaches to reduce the impact of bias will depend on the methodology, but our work does suggest general principles.

Firstly, to consider the potential for bias within the data source and whether stratification may reduce it, for example, by selecting a smaller number of healthcare organisations or a narrower time period. Secondly, to consider adjustment or inclusion of patient, condition, GP practice and calendar year variables within analytical models. However, such an approach is not always recommended, particularly if prediction is the aim, as inclusion of factors such as ethnicity in algorithms may reinforce existing bias.(31) In NLP, text style transfer is often used as a method to control for different styles of writing, which may have relevance to approaches to account for the different coding styles of clinicians.(32) However, these approaches are complicated within the EHR as people are likely to see multiple different clinicians over time, with a small set of codes recorded at each visit. Finally, it is vital that generated representations or predictions from modelling are evaluated in different patient subgroups.

## Implications for clinical practice

Although difficult to determine the extent to which our findings are attributed to coding quality versus healthcare utilisation, previous studies have reported variability in coding across practices for specific conditions.(33,34) This highlights a need to improve the quality of coding in primary care, given its impact on the reliability and usefulness of the data for secondary purposes such as research. Improving the quality of coding in primary care poses several challenges, due to the different incentives for clinicians, who document most of the consultation in free text.(7) Potential strategies include implementing structured templates for recording consultations, or developing NLP methods capable of interpreting and codifying the free-text documented during clinical encounters, without adding to clinician workload.(7)

## Conclusion

1  
2  
3 Our study found significant variation in the frequency of diagnostic codes recorded in the  
4 primary care EHR after diagnosis, related to patient socio-demographics, coding incentives  
5 and GP practice, and a significant reduction in the frequency of codes associated with the  
6 onset of the COVID-19 pandemic. These factors should be considered by researchers using  
7 NLP methods, or other approaches using temporally ordered sequences of codes in primary  
8 care EHRs, to reduce the risk of bias.  
9  
10  
11  
12  
13  
14

### 15 **Funding**

16 This research is funded through a clinical PhD fellowship awarded to TB from the Wellcome  
17 Trust 4i programme at Imperial College London (grant number N/A). JC acknowledge  
18 support from the Wellcome Trust (grant number N/A). MB acknowledges support from  
19 EPSRC grant EP/N014529/1 supporting the EPSRC Centre for Mathematics of Precision  
20 Healthcare. TW, AM and PA acknowledge support from the National Institute for Health and  
21 Care Research (NIHR) under the Applied Research Collaboration (ARC) Northwest London  
22 (grant number N/A). The views expressed in this publication are those of the authors and not  
23 necessarily those of the NHS, the NIHR, the Wellcome Trust or the Department of Health  
24 and Social Care.  
25  
26  
27  
28  
29  
30  
31  
32  
33

### 34 **Competing interests**

35 The authors have no competing interests to declare  
36  
37  
38  
39

### 40 **Contributor statement**

41 TB conceptualised the study, conducted the data management and formal analysis and wrote  
42 the first draft of the manuscript. TB, JS, DS, TW, AM, MB and PA contributed to the study  
43 design, methodology, interpretation of findings and reviewing and editing the manuscript. TB  
44 is the guarantor and accepts full responsibility for the work and the conduct of the study, had  
45 access to the data, and controlled the decision to publish. The corresponding author attests  
46 that all listed authors meet authorship criteria and that no others meeting the criteria have  
47 been omitted.  
48  
49  
50  
51  
52  
53  
54

### 55 **Data sharing**

56 The data used in this study are not publicly available as access is subject to approval  
57 processes. More information is available from CPRD: <https://cprd.com/research-applications>  
58  
59  
60

## Ethics approval

Data access to the Clinical Practice Research Datalink (CPRD) and ethical approval was granted by CPRD's Research Data Governance Process on 28<sup>th</sup> April 2022 (Protocol reference: 22\_001818).

## Acknowledgements

Data management was provided by the Big Data and Analytical Unit (BDAU) at the Institute of Global Health Innovation (IGHI).

## References

1. Li Y, Rao S, Solares JRA, Hassaine A, Ramakrishnan R, Canoy D, et al. BEHRT: Transformer for Electronic Health Records. *Sci Rep*. 2020 Apr 28;10(1):7155.
2. Solares JRA, Zhu Y, Hassaine A, Rao S, Li Y, Mamouei M, et al. Transfer Learning in Electronic Health Records through Clinical Concept Embedding. 2021;1–14.
3. Altuncu MT, Mayer E, Yaliraki SN, Barahona M. From free text to clusters of content in health records: an unsupervised graph partitioning approach. *Applied Network Science*. 2019 Dec;4(1):2.
4. Kraljevic Z, Searle T, Shek A, Roguski L, Noor K, Bean D, et al. Multi-domain clinical natural language processing with MedCAT: The Medical Concept Annotation Toolkit. *Artif Intell Med*. 2021 Jul;117:102083.
5. Rasmy L, Xiang Y, Xie Z, Tao C, Zhi D. Med-BERT: pretrained contextualized embeddings on large-scale structured electronic health records for disease prediction. *npj Digit Med*. 2021 May 20;4(1):1–13.
6. Choi E, Bahadori MT, Searles E, Coffey C, Thompson M, Bost J, et al. Multi-layer representation learning for medical concepts. *Proceedings of the ACM SIGKDD International Conference on Knowledge Discovery and Data Mining*. 2016;13-17-Aug:1495–504.
7. Shemtob L, Beaney T, Norton J, Majeed A. How can we improve the quality of data collected in general practice? *BMJ*. 2023 Mar 15;380:e071950.
8. Khan NF, Harrison SE, Rose PW. Validity of diagnostic coding within the General Practice Research Database: a systematic review. *British Journal of General Practice*. 2010;60(572):e128--e136.
9. Verheij RA, Curcin V, Delaney BC, McGilchrist MM. Possible Sources of Bias in Primary Care Electronic Health Record Data Use and Reuse. *J Med Internet Res*. 2018 May 29;20(5):e185.



10. Bots SH, Groenwold RHH, Dekkers OM. Using electronic health record data for clinical research: a quick guide. *European Journal of Endocrinology*. 2022 Apr 1;186(4):E1–6.
11. Beech J, Beccy Baird. The King’s Fund. 2020 [cited 2023 Jun 23]. GP funding and contracts explained. Available from: <https://www.kingsfund.org.uk/publications/gp-funding-and-contracts-explained>
12. Forbes LJ, Marchand C, Doran T, Peckham S. The role of the Quality and Outcomes Framework in the care of long-term conditions: a systematic review. *Br J Gen Pract*. 2017 Nov 1;67(664):e775.
13. Minchin M, Roland M, Richardson J, Rowark S, Guthrie B. Quality of Care in the United Kingdom after Removal of Financial Incentives. *New England Journal of Medicine*. 2018 Sep 5;379(10):948–57.
14. Roland M, Guthrie B. Quality and Outcomes Framework: what have we learnt? *BMJ*. 2016 Aug 4;354:i4060.
15. Wolf A, Dedman D, Campbell J, Booth H, Lunn D, Chapman J, et al. Data resource profile: Clinical Practice Research Datalink (CPRD) Aurum. *International Journal of Epidemiology*. 2019 Dec 1;48(6):1740–1740g.
16. Herrett E, Gallagher AM, Bhaskaran K, Forbes H, Mathur R, van Staa T, et al. Data Resource Profile: Clinical Practice Research Datalink (CPRD). *International Journal of Epidemiology*. 2015 Jun 1;44(3):827–36.
17. Lewis JD, Bilker WB, Weinstein RB, Strom BL. The relationship between time since registration and measured incidence rates in the General Practice Research Database. *Pharmacoepidemiology and Drug Safety*. 2005 Jul 1;14(7):443–51.
18. Ministry of Housing, Communities & Local Government. English indices of deprivation 2019 [Internet]. [cited 2020 Oct 18]. Available from: <https://www.gov.uk/government/statistics/english-indices-of-deprivation-2019>
19. Mathur R, Bhaskaran K, Chaturvedi N, Leon DA, vanStaa T, Grundy E, et al. Completeness and usability of ethnicity data in UK-based primary care and hospital databases. *Journal of Public Health*. 2014 Dec 1;36(4):684–92.
20. Head A, Fleming K, Kypridemos C, Schofield P, Pearson-Stuttard J, O’Flaherty M. Inequalities in incident and prevalent multimorbidity in England, 2004–2013: a population-based, descriptive study. *The Lancet Healthy Longevity*. 2021 Aug 1;2(8):e489–97.
21. Kuan V, Denaxas S, Gonzalez-Izquierdo A, Direk K, Bhatti O, Husain S, et al. A chronological map of 308 physical and mental health conditions from 4 million individuals in the English National Health Service. *The Lancet Digital Health*. 2019 Jun 1;1(2):e63–77.
22. Dean CB. Testing for Overdispersion in Poisson and Binomial Regression Models. *Journal of the American Statistical Association*. 1992;87(418):451–7.



23. Dunn PK, Smyth GK. Randomized Quantile Residuals. *Journal of Computational and Graphical Statistics*. 1996 Sep;5(3):236–44.
24. Feng C, Li L, Sadeghpour A. A comparison of residual diagnosis tools for diagnosing regression models for count data. *BMC Med Res Methodol*. 2020 Jul 1;20:175.
25. Fisher R, Dunn P, Asaria M, Thorlby R. Comparing general practice in areas of high and low socioeconomic deprivation in England. :30.
26. Ellis DA, McQueenie R, McConnachie A, Wilson P, Williamson AE. Demographic and practice factors predicting repeated non-attendance in primary care: a national retrospective cohort analysis. *The Lancet Public Health*. 2017 Dec 1;2(12):e551–9.
27. Gopfert A, Deeny SR, Fisher R, Stafford M. Primary care consultation length by deprivation and multimorbidity in England: an observational study using electronic patient records. *Br J Gen Pract*. 2021 Mar 1;71(704):e185–92.
28. Jong J de, Groenewegen P, Westert G. Medical practice variation: does it cluster within general practitioners' practices? In: *Morbidity, Performance and Quality in Primary Care*. CRC Press; 2006.
29. Gluckman PD. Evolving a definition of disease. *Archives of Disease in Childhood*. 2007 Dec;92(12):1053.
30. Majeed A, Maile EJ, Bindman AB. The primary care response to COVID-19 in England's National Health Service. *J R Soc Med*. 2020 Jun;113(6):208–10.
31. Obermeyer Z, Powers B, Vogeli C, Mullainathan S. Dissecting racial bias in an algorithm used to manage the health of populations. *Science*. 2019;366(6464):447–53.
32. Jin D, Jin Z, Hu Z, Vechtomova O, Mihalcea R. Deep Learning for Text Style Transfer: A Survey [Internet]. arXiv; 2021 [cited 2022 Nov 23]. Available from: <http://arxiv.org/abs/2011.00416>
33. de Lusignan S, Valentin T, Chan T, Hague N, Wood O, van Vlymen J, et al. Problems with primary care data quality: osteoporosis as an exemplar. *Inform Prim Care*. 2004;12(3):147–56.
34. Rollason W, Khunti K, de Lusignan S. Variation in the recording of diabetes diagnostic data in primary care computer systems: implications for the quality of care. *Inform Prim Care*. 2009;17(2):113–9.

Figure 1 legend:

Note: different ranges used in each axis

Figure 2 legend:

1  
2  
3 Note: Points represent estimates of the incidence rate ratio and bars represent 95% confidence  
4 intervals from negative binomial regression models. Corresponding values and coefficients  
5 for pre-existing QOF and non-QOF conditions are given in appendix Tables A5 and A6.  
6  
7  
8  
9

10  
11  
12 Figure 3 legend:

13 Note: Points represent estimates of the incidence rate ratio and bars represent 95% confidence  
14 intervals from negative binomial regression models. Corresponding values and coefficients  
15 for pre-existing QOF and non-QOF conditions are given in appendix Tables A7 and A8.  
16  
17  
18  
19  
20  
21  
22  
23  
24  
25  
26  
27  
28  
29  
30  
31  
32  
33  
34  
35  
36  
37  
38  
39  
40  
41  
42  
43  
44  
45  
46  
47  
48  
49  
50  
51  
52  
53  
54  
55  
56  
57  
58  
59  
60

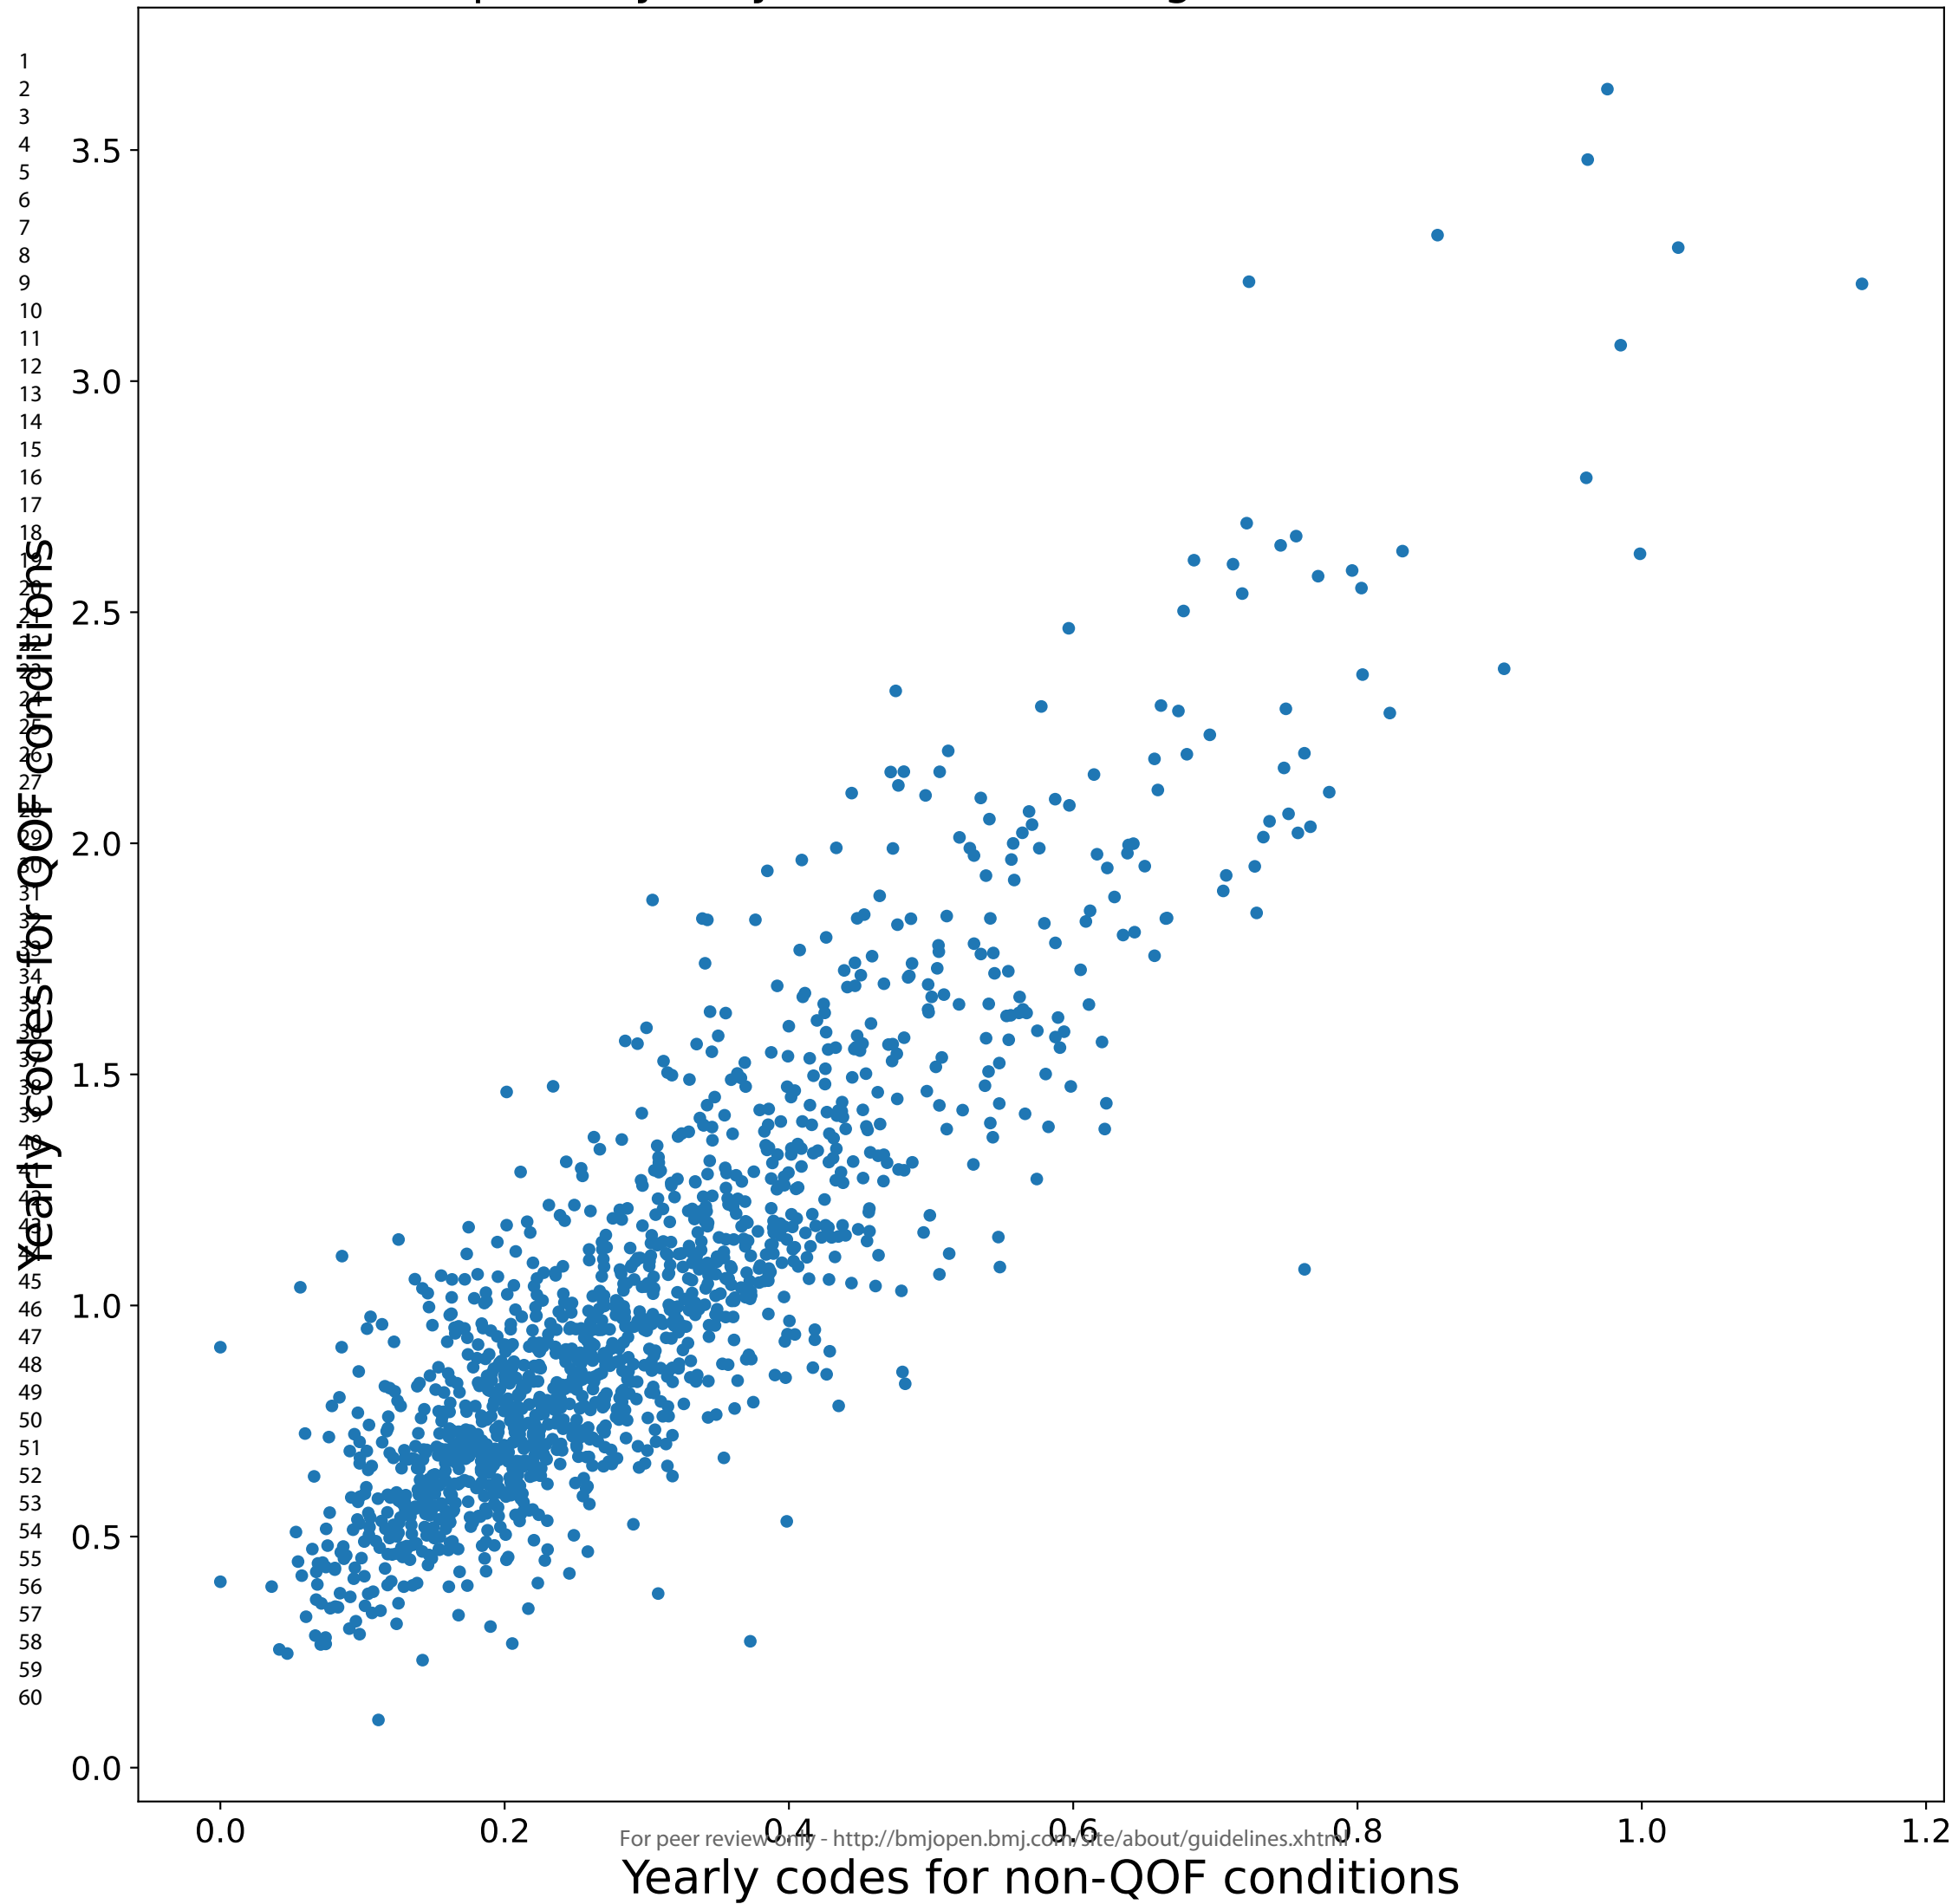

**Age category (years)**

1 Under 40

2 40-49

3 50-59

4 60-69 (reference)

5 70-79

6 80 or more

7 **Sex**

8 Female (reference)

9 Male

10 **Ethnicity category**

11 White (reference)

12 South Asian

13 Black

14 Other

15 Mixed

16 Missing

17 **IMD decile**

18 1 (most deprived)

19 2

20 3

21 4

22 5

23 6

24 7

25 8

26 9

27 10 (least deprived)

28 **Calendar year of diagnosis**

29 2015 (reference)

30 2016

31 2017

32 2018

33 2019

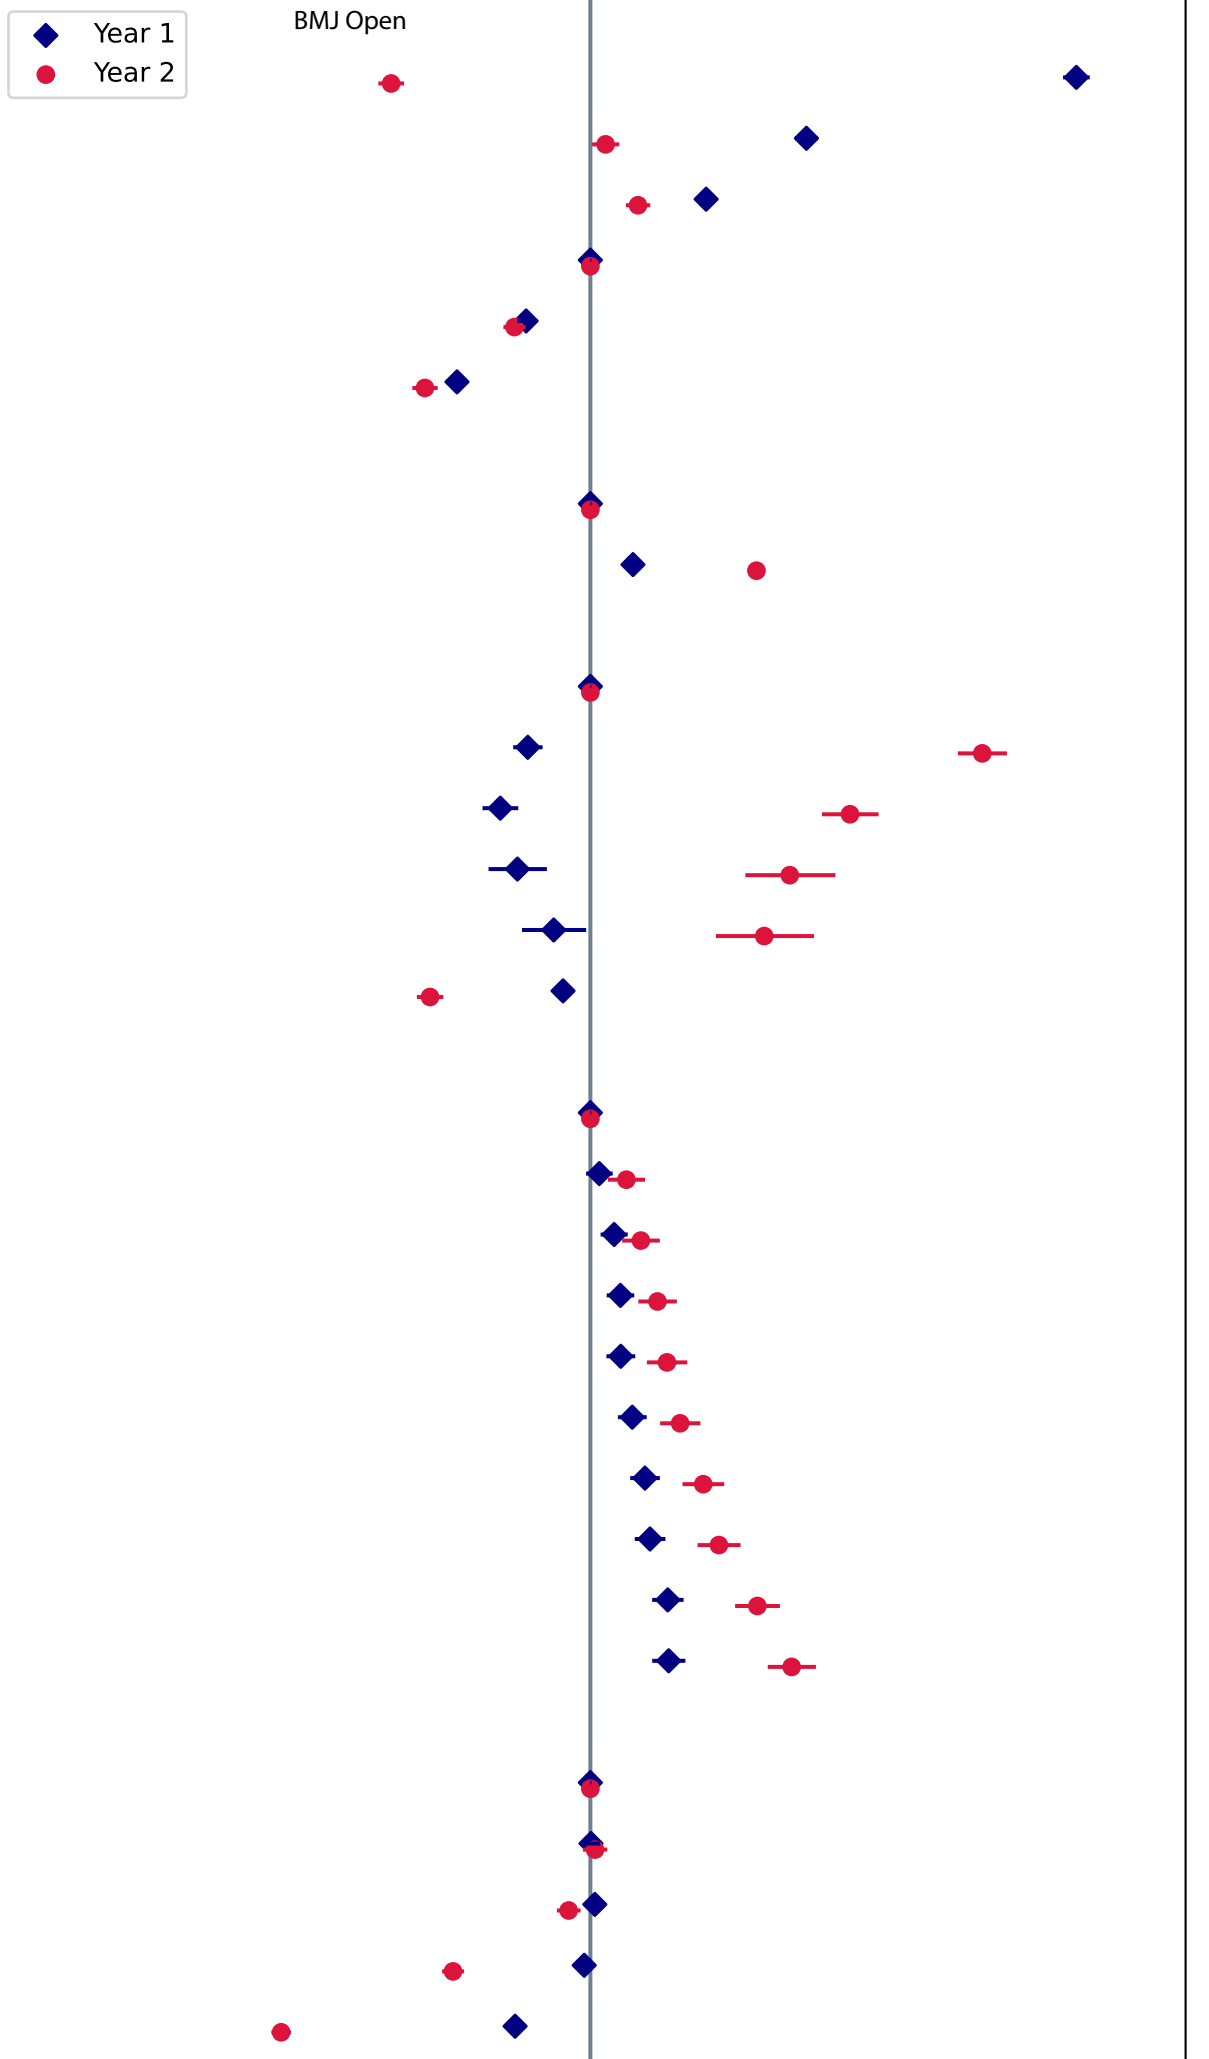

**Age category (years)**

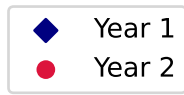

1 Under 40  
2 40-49  
3  
4 50-59  
5  
6 60-69 (reference)  
7  
8 70-79  
9  
10 80 or more

**Sex**

13 Female (reference)  
14  
15 Male  
16

**Ethnicity category**

17  
18  
19 White (reference)  
20  
21 South Asian  
22  
23 Black  
24  
25 Other  
26  
27 Mixed  
28  
29 Missing  
30

**IMD decile**

31  
32 1 (most deprived)  
33  
34 2  
35  
36 3  
37  
38 4  
39  
40 5  
41  
42 6  
43  
44 7  
45  
46 8  
47  
48 9  
49  
50 10 (least deprived)

**Calendar year of diagnosis**

51  
52  
53 2015 (reference)  
54  
55 2016  
56  
57 2017  
58  
59 2018  
60  
2019

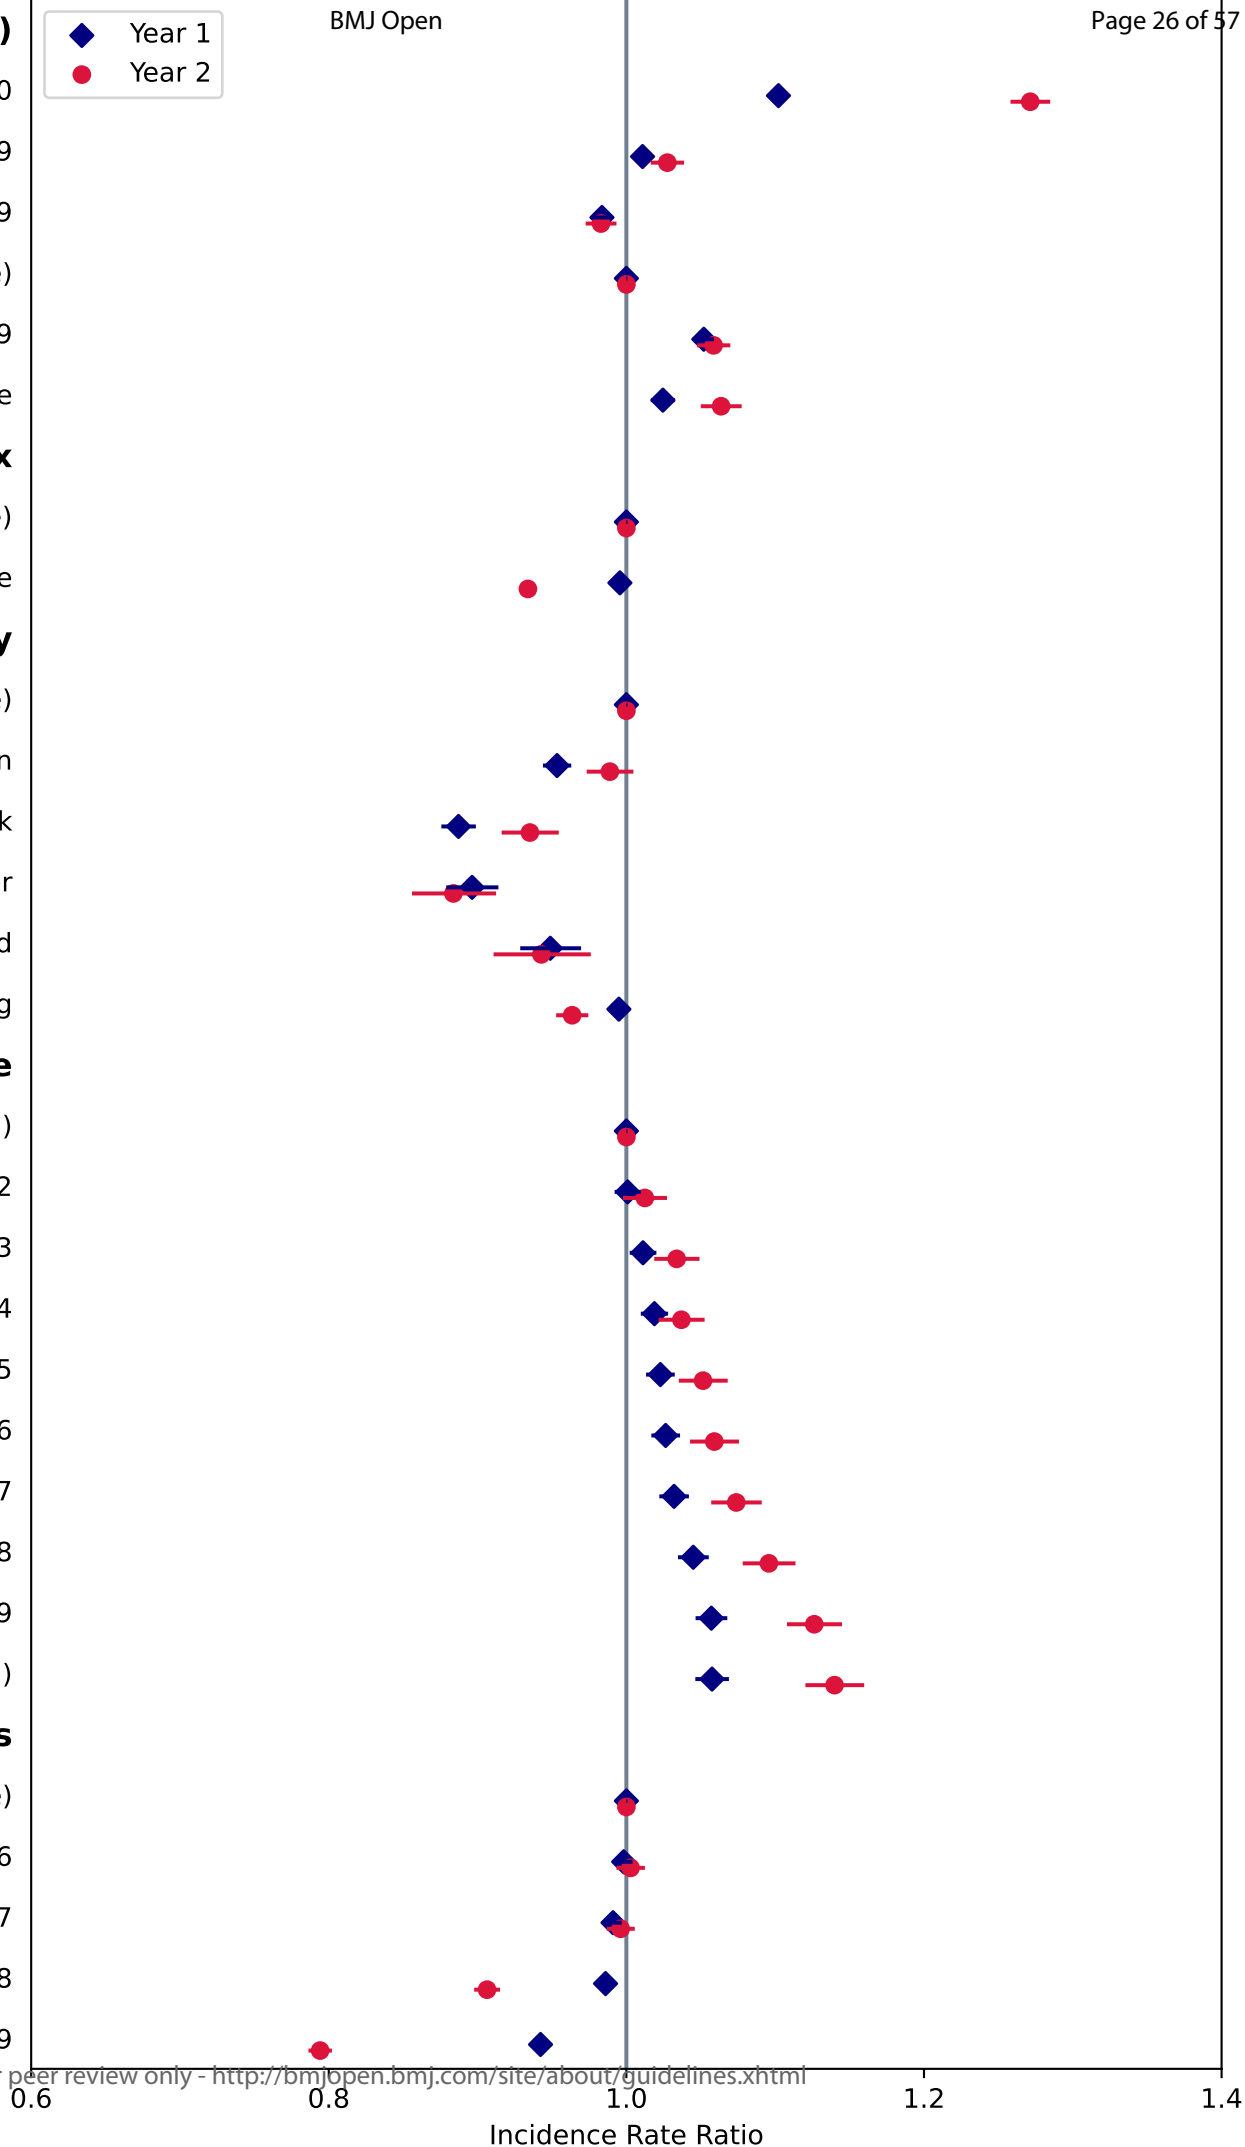

**Appendix****Identifying potential biases in code sequences in primary care electronic healthcare records: a retrospective cohort study of the determinants of code frequency**

Beaney T<sup>1,2</sup> (0000-0001-9709-7264), Clarke J<sup>2</sup>, Salman D<sup>1,3</sup>, Woodcock T<sup>1</sup>, Majeed A<sup>1</sup>,  
Barahona M<sup>2</sup>, Aylin P<sup>1</sup>

1. Department of Primary Care and Public Health, Imperial College London, London, W6 8RP, United Kingdom
2. Centre for Mathematics of Precision Healthcare, Department of Mathematics, Imperial College London, London, SW7 2AZ, United Kingdom
3. MSk Lab, Department of Surgery and Cancer, Faculty of Medicine, Imperial College London, London, UK

Corresponding Author:

Dr Thomas Beaney

Department of Primary Care and Public Health, Imperial College London, London, W6 8RP,  
United Kingdom

Email: [thomas.beaney@imperial.ac.uk](mailto:thomas.beaney@imperial.ac.uk)

1  
2  
3 Patients were included with continuous registration dates between 1<sup>st</sup> January 2014 and 31<sup>st</sup>  
4 December 2020. The 1<sup>st</sup> January 2014 was chosen to allow for a full one year of registration at  
5 a GP practice prior to follow-up, to reduce the potential impact of bias from newly registered  
6 patients having pre-existing conditions coded for the first time at their new practice. The end  
7 date of 31<sup>st</sup> December 2020 was chosen to provide at least one full year of follow-up for  
8 conditions newly diagnosed in 2019. Patients were followed up until the earliest date of death,  
9 deregistration and latest date of data extraction from their practice, if after 31<sup>st</sup> December 2020.  
10 The earliest possible censoring date for a patient was 1<sup>st</sup> January 2021 and the last date of  
11 follow-up for a patient was 21<sup>st</sup> March 2022.  
12  
13  
14  
15  
16  
17  
18  
19

### 20 Chronic conditions

21 Diseases were mapped using code lists developed for the CALIBER study, and adapted for use  
22 in multimorbidity in CPRD Aurum.<sup>1,2</sup> We reviewed the codes in these lists, and made  
23 amendments to the code lists for diabetes. The ‘other/unspecified’ diabetes code list contained  
24 codes specific to both Type 1 and Type 2 diabetes, and we removed these to ensure the list  
25 included only codes where a more specific Type 1 or Type 2 diagnosis was not stated. We  
26 added chronic primary pain to the set of included conditions and created a new code list.  
27 Previous studies of multimorbidity in primary care settings have found a high prevalence and  
28 burden of chronic pain.<sup>3,4</sup> However, in order to avoid double counting of pain related to another  
29 chronic condition included, we excluded secondary causes, and included only primary pain  
30 conditions.  
31  
32  
33  
34  
35  
36  
37  
38  
39

### 40 Assignment to QOF

41 Diseases were classified as included or not included in QOF by two clinicians with experience  
42 working as GPs: TB and DS. The first QOF year in 2004/2005 included eleven diseases, with  
43 new conditions added in subsequent years.<sup>5</sup> Rheumatoid arthritis was added to QOF in  
44 2013/2014, but there were no subsequent additions of any of the diseases included in this  
45 study.<sup>6</sup> However, hypothyroidism was included in QOF from its start until 2014/15 when it  
46 was removed.<sup>7</sup> The thyroid disease category from CALIBER included codes for both  
47 hypothyroidism and hyperthyroidism. We therefore excluded the thyroid disease category from  
48 comparisons of QOF to avoid any carry-over effect from prior inclusion in QOF, and dilution  
49 from non-hypothyroid conditions. The following QOF conditions from 2014/15 to 2019/20  
50 were included:  
51  
52  
53  
54  
55  
56  
57  
58  
59  
60

- 1
- 2
- 3 1. Coronary Heart Disease
- 4 2. Left Ventricular Dysfunction / Heart Failure (from 2006)
- 5
- 6 3. Stroke (and TIA from 2006)
- 7
- 8 4. Hypertension
- 9
- 10 5. Diabetes
- 11 6. COPD
- 12
- 13 7. Epilepsy
- 14
- 15 8. Cancer
- 16
- 17 9. Mental Health
- 18 10. Asthma
- 19
- 20 11. Dementia
- 21
- 22 12. Depression
- 23
- 24 13. CKD
- 25 14. Atrial fibrillation
- 26
- 27 15. Obesity
- 28
- 29 16. Learning disabilities
- 30 17. Palliative care
- 31
- 32 18. Smoking
- 33
- 34 19. Cardio-vascular disease (primary prevention)
- 35
- 36 20. Peripheral Arterial Disease (PAD)
- 37
- 38 21. Osteoporosis
- 39 22. Rheumatoid arthritis
- 40
- 41
- 42
- 43
- 44
- 45
- 46
- 47
- 48
- 49
- 50
- 51
- 52
- 53
- 54
- 55
- 56
- 57
- 58
- 59
- 60

For analyses of counts per calendar year, the total counts of disease codes were calculated for the first and second year from diagnosis. Counts were stratified according to whether a condition was included in QOF. A patient was included for a given calendar year if they had at least one QOF or non-QOF condition diagnosed in that year, as shown in Table A1.



**Table A1: example of the stratification of condition and calendar year for each newly diagnosed condition for three hypothetical patients**

| Patient | Age | Condition | Calendar year | Count in year one | Count in year two |
|---------|-----|-----------|---------------|-------------------|-------------------|
| 1       | 67  | QOF       | 2015          | 0                 | 0                 |
| 1       | 68  | QOF       | 2016          | 2                 | 0                 |
| 1       | 70  | QOF       | 2018          | 4                 | 2                 |
| 1       | 67  | Non-QOF   | 2015          | 1                 | 1                 |
| 2       | 28  | Non-QOF   | 2019          | 1                 | 2                 |
| 3       | 52  | QOF       | 2017          | 5                 | 4                 |
| 3       | 52  | Non-QOF   | 2017          | 2                 | 2                 |

### Statistical analyses

Mixed effects negative binomial models were constructed. We considered use of a zero-inflated model, but coefficients from the logit and negative binomial components of the model were similar, and so in the interests of interpretable findings, the more parsimonious negative binomial model was selected.

Equation for the mixed effects negative binomial regression model, including fixed effects for calendar year and GP practice and random effects for patient:

$$\log(y_{i,j}) = \beta_0 + \beta_1 age_{i,j} + \beta_2 gender_{i,j} + \beta_3 ethnicity_{i,j} + \beta_4 IMD_{i,j} \\ + \beta_5 year_{i,j} + \beta_6 GP_{i,j} + u_j$$

where  $i$  represents QOF or non-QOF conditions newly diagnosed in patient  $j$  and  $y_{i,j}$  is the count of codes in the given year.

**A2: Frequency and percentage of pre-existing diseases (as of 1<sup>st</sup> January 2015) for all 3,113,724 eligible patients**

| <b>Pre-existing disease</b>                      | <b>Frequency</b> | <b>Percentage</b> |
|--------------------------------------------------|------------------|-------------------|
| Hypertension                                     | 751009           | 24.12%            |
| Enthesopathy and synovial disorder               | 736087           | 23.64%            |
| Dermatitis                                       | 710945           | 22.83%            |
| Depression                                       | 568871           | 18.27%            |
| Anxiety disorders                                | 507406           | 16.30%            |
| Allergic and chronic rhinitis                    | 477053           | 15.32%            |
| Asthma                                           | 456335           | 14.66%            |
| Osteoarthritis (excl spine)                      | 444668           | 14.28%            |
| Gastro-oesophageal reflux disease                | 301839           | 9.69%             |
| Obesity                                          | 294916           | 9.47%             |
| Diabetes Mellitus: other or not specified        | 285681           | 9.17%             |
| Hearing loss                                     | 279470           | 8.98%             |
| Migraine                                         | 270415           | 8.68%             |
| Type 2 Diabetes Mellitus                         | 255578           | 8.21%             |
| Irritable bowel syndrome                         | 246744           | 7.92%             |
| Abdominal Hernia                                 | 237968           | 7.64%             |
| Acne                                             | 225183           | 7.23%             |
| Chronic sinusitis                                | 212496           | 6.82%             |
| Thyroid Disease                                  | 204639           | 6.57%             |
| Spondylosis                                      | 181722           | 5.84%             |
| Gastritis and duodenitis                         | 181668           | 5.83%             |
| Cataract                                         | 160486           | 5.15%             |
| Chronic Kidney Disease                           | 158134           | 5.08%             |
| Coronary Heart Disease (not otherwise specified) | 144806           | 4.65%             |
| Seborrheic dermatitis                            | 143168           | 4.60%             |
| Urinary Incontinence                             | 137919           | 4.43%             |
| Alcohol Misuse                                   | 132717           | 4.26%             |
| Psoriasis                                        | 132694           | 4.26%             |
| Diaphragmatic hernia                             | 131539           | 4.22%             |
| Diverticular Disease                             | 131332           | 4.22%             |
| Tinnitus                                         | 123308           | 3.96%             |
| Gout                                             | 120568           | 3.87%             |
| Stable Angina                                    | 120309           | 3.86%             |
| Intervertebral disc disorders                    | 117787           | 3.78%             |
| Anaemia: other                                   | 116859           | 3.75%             |
| Diabetic Eye Disease                             | 102901           | 3.30%             |
| Rosacea                                          | 96511            | 3.10%             |
| Dysmenorrhoea                                    | 94881            | 3.05%             |

|    |                                         |       |       |
|----|-----------------------------------------|-------|-------|
| 1  |                                         |       |       |
| 2  |                                         |       |       |
| 3  | Benign Prostatic Hyperplasia            | 92304 | 2.96% |
| 4  | Osteoporosis                            | 91850 | 2.95% |
| 5  | Primary Malignancy: Skin                | 89500 | 2.87% |
| 6  | COPD                                    | 84482 | 2.71% |
| 7  | Atrial Fibrillation                     | 80645 | 2.59% |
| 8  | Peripheral Neuropathy                   | 77117 | 2.48% |
| 9  | Chronic Fatigue Syndrome                | 67489 | 2.17% |
| 10 | Myocardial Infarction                   | 67215 | 2.16% |
| 11 | Vitamin B12 deficiency anaemia          | 64015 | 2.06% |
| 12 | Glaucoma                                | 58081 | 1.87% |
| 13 | Epilepsy                                | 53058 | 1.70% |
| 14 | Stroke: not otherwise specified         | 50614 | 1.63% |
| 15 | Substance Misuse                        | 50251 | 1.61% |
| 16 | Primary Malignancy: Breast              | 49737 | 1.60% |
| 17 | Venous thromboembolic disease (Excl PE) | 47013 | 1.51% |
| 18 | Transient ischaemic attack              | 44616 | 1.43% |
| 19 | Fibromatosis                            | 42701 | 1.37% |
| 20 | Neuropathic Bladder                     | 42008 | 1.35% |
| 21 | Raynaud's syndrome                      | 38879 | 1.25% |
| 22 | Endometriosis                           | 37868 | 1.22% |
| 23 | Sleep apnoea                            | 35743 | 1.15% |
| 24 | Heart failure                           | 35364 | 1.14% |
| 25 | Peripheral Vascular Disease             | 32852 | 1.06% |
| 26 | Rheumatoid Arthritis                    | 32070 | 1.03% |
| 27 | Macular degeneration                    | 30761 | 0.99% |
| 28 | Chronic primary pain                    | 29506 | 0.95% |
| 29 | Anterior and Intermediate Uveitis       | 28838 | 0.93% |
| 30 | Visual impairment and blindness         | 28372 | 0.91% |
| 31 | Polymyalgia Rheumatica                  | 27447 | 0.88% |
| 32 | Primary Malignancy: Prostate            | 26288 | 0.84% |
| 33 | Ulcerative colitis                      | 22236 | 0.71% |
| 34 | Nonrheumatic mitral valve disorders     | 20980 | 0.67% |
| 35 | Spinal stenosis                         | 20820 | 0.67% |
| 36 | Nonrheumatic aortic valve disorders     | 20695 | 0.66% |
| 37 | Schizophrenia                           | 20394 | 0.65% |
| 38 | Type 1 Diabetes Mellitus                | 19978 | 0.64% |
| 39 | Unstable Angina                         | 18925 | 0.61% |
| 40 | Trigeminal neuralgia                    | 18854 | 0.61% |
| 41 | Scleritis and episcleritis              | 18830 | 0.60% |
| 42 | Fatty Liver                             | 18774 | 0.60% |
| 43 | Barrett's oesophagus                    | 18152 | 0.58% |
| 44 | Supraventricular tachycardia            | 18128 | 0.58% |
| 45 | Intellectual disability                 | 18073 | 0.58% |
| 46 | Pancreatitis                            | 18043 | 0.58% |
| 47 |                                         |       |       |
| 48 |                                         |       |       |
| 49 |                                         |       |       |
| 50 |                                         |       |       |
| 51 |                                         |       |       |
| 52 |                                         |       |       |
| 53 |                                         |       |       |
| 54 |                                         |       |       |
| 55 |                                         |       |       |
| 56 |                                         |       |       |
| 57 |                                         |       |       |
| 58 |                                         |       |       |
| 59 |                                         |       |       |
| 60 |                                         |       |       |

|    |                                        |       |       |
|----|----------------------------------------|-------|-------|
| 1  |                                        |       |       |
| 2  |                                        |       |       |
| 3  | Bronchiectasis                         | 18006 | 0.58% |
| 4  | Primary Malignancy: Melanoma           | 17594 | 0.57% |
| 5  | Personality disorders                  | 17448 | 0.56% |
| 6  | Alopecia areata                        | 17111 | 0.55% |
| 7  | Primary Malignancy: Bowel              | 16746 | 0.54% |
| 8  | Obsessive-compulsive disorder          | 15553 | 0.50% |
| 9  | Polycystic ovarian syndrome            | 14606 | 0.47% |
| 10 | Crohn's disease                        | 14445 | 0.46% |
| 11 | Folate deficiency anaemia              | 13853 | 0.44% |
| 12 | Retinal vascular occlusions            | 13829 | 0.44% |
| 13 | Obstructive and reflux uropathy        | 13725 | 0.44% |
| 14 | Ischaemic stroke                       | 13451 | 0.43% |
| 15 | Hidradenitis suppurativa               | 13305 | 0.43% |
| 16 | Vitiligo                               | 13218 | 0.42% |
| 17 | Meniere's Disease                      | 13192 | 0.42% |
| 18 | Bipolar affective disorder and mania   | 12856 | 0.41% |
| 19 | Coeliac disease                        | 12625 | 0.41% |
| 20 | Diabetic Neuropathy                    | 12517 | 0.40% |
| 21 | Chronic viral hepatitis                | 11885 | 0.38% |
| 22 | Thrombophilia                          | 11527 | 0.37% |
| 23 | Psoriatic Arthritis                    | 11201 | 0.36% |
| 24 | Eating Disorders                       | 11171 | 0.36% |
| 25 | Dementia                               | 10297 | 0.33% |
| 26 | Spondylolisthesis                      | 10229 | 0.33% |
| 27 | Secondary Thrombocytopenia             | 9800  | 0.31% |
| 28 | Congenital Septal Defect               | 9203  | 0.30% |
| 29 | Sarcoidosis                            | 9090  | 0.29% |
| 30 | Multiple sclerosis                     | 9070  | 0.29% |
| 31 | Benign essential tremor                | 9008  | 0.29% |
| 32 | Right bundle branch block combinations | 8160  | 0.26% |
| 33 | Primary Malignancy: Bladder            | 8066  | 0.26% |
| 34 | Primary Malignancy: other              | 8021  | 0.26% |
| 35 | Glomerulonephritis                     | 7950  | 0.26% |
| 36 | Autism and Asperger's syndrome         | 7920  | 0.25% |
| 37 | Non-Hodgkin Lymphoma                   | 7579  | 0.24% |
| 38 | Hyperparathyroidism                    | 7437  | 0.24% |
| 39 | Pleural effusion                       | 7368  | 0.24% |
| 40 | Hyperkinetic disorders                 | 7056  | 0.23% |
| 41 | Ankylosing spondylitis                 | 7044  | 0.23% |
| 42 | Lupus Erythematosus                    | 6976  | 0.22% |
| 43 | Cirrhosis                              | 6768  | 0.22% |
| 44 | Alcoholic liver disease                | 6621  | 0.21% |
| 45 | Left bundle branch block               | 6512  | 0.21% |
| 46 | Subarachnoid haemorrhage               | 6158  | 0.20% |
| 47 |                                        |       |       |
| 48 |                                        |       |       |
| 49 |                                        |       |       |
| 50 |                                        |       |       |
| 51 |                                        |       |       |
| 52 |                                        |       |       |
| 53 |                                        |       |       |
| 54 |                                        |       |       |
| 55 |                                        |       |       |
| 56 |                                        |       |       |
| 57 |                                        |       |       |
| 58 |                                        |       |       |
| 59 |                                        |       |       |
| 60 |                                        |       |       |

|    |                                         |      |       |
|----|-----------------------------------------|------|-------|
| 1  |                                         |      |       |
| 2  |                                         |      |       |
| 3  | Collapsed vertebra                      | 6082 | 0.20% |
| 4  | Autonomic Neuropathy                    | 5496 | 0.18% |
| 5  | Cardiomyopathy: other                   | 5465 | 0.18% |
| 6  | Parkinson's disease                     | 5333 | 0.17% |
| 7  | Leukaemia                               | 5243 | 0.17% |
| 8  | Giant Cell arteritis                    | 5225 | 0.17% |
| 9  | Hyposplenism                            | 4737 | 0.15% |
| 10 | HIV                                     | 4697 | 0.15% |
| 11 | Endometrial hyperplasia and hypertrophy | 4655 | 0.15% |
| 12 | Primary Malignancy: Uterus              | 4589 | 0.15% |
| 13 | Sjogren's Syndrome                      | 4559 | 0.15% |
| 14 | Spina bifida                            | 4427 | 0.14% |
| 15 | Cerebral Palsy                          | 4011 | 0.13% |
| 16 | Primary Thrombocytopaenia               | 3979 | 0.13% |
| 17 | Pleural plaque                          | 3972 | 0.13% |
| 18 | Abdominal Aortic Aneurysm               | 3931 | 0.13% |
| 19 | Atrioventricular blocks                 | 3920 | 0.13% |
| 20 | Chronic Cystitis                        | 3892 | 0.12% |
| 21 | Intracerebral haemorrhage               | 3815 | 0.12% |
| 22 | Primary Malignancy: Ovary               | 3689 | 0.12% |
| 23 | Primary Malignancy: Cervix              | 3500 | 0.11% |
| 24 | Asbestosis                              | 3358 | 0.11% |
| 25 | Other haemolytic anaemias               | 3152 | 0.10% |
| 26 | Primary Malignancy: Testis              | 3133 | 0.10% |
| 27 | Thalassaemia                            | 3055 | 0.10% |
| 28 | Hypertrophic Nasal Turbinates           | 3022 | 0.10% |
| 29 | Primary Malignancy: Kidney              | 2988 | 0.10% |
| 30 | Polycythaemia vera                      | 2864 | 0.09% |
| 31 | Primary Malignancy: Oropharyngeal       | 2809 | 0.09% |
| 32 | Autoimmune liver disease                | 2792 | 0.09% |
| 33 | Ventricular tachycardia                 | 2720 | 0.09% |
| 34 | Secondary polycythaemia                 | 2625 | 0.08% |
| 35 | Posterior Uveitis                       | 2540 | 0.08% |
| 36 | Pulmonary Fibrosis                      | 2523 | 0.08% |
| 37 | Hodgkin Lymphoma                        | 2384 | 0.08% |
| 38 | Hypersplenism                           | 2362 | 0.08% |
| 39 | Dilated cardiomyopathy                  | 2359 | 0.08% |
| 40 | Primary Malignancy: Lung                | 2244 | 0.07% |
| 41 | Primary Malignancy: Thyroid             | 2172 | 0.07% |
| 42 | Rheumatic Valve Disorder                | 2034 | 0.07% |
| 43 | Secondary Malignancy_other              | 1975 | 0.06% |
| 44 | Down's syndrome                         | 1928 | 0.06% |
| 45 | Multiple valve disorder                 | 1834 | 0.06% |
| 46 | Idiopathic Intracranial Hypertension    | 1823 | 0.06% |
| 47 |                                         |      |       |
| 48 |                                         |      |       |
| 49 |                                         |      |       |
| 50 |                                         |      |       |
| 51 |                                         |      |       |
| 52 |                                         |      |       |
| 53 |                                         |      |       |
| 54 |                                         |      |       |
| 55 |                                         |      |       |
| 56 |                                         |      |       |
| 57 |                                         |      |       |
| 58 |                                         |      |       |
| 59 |                                         |      |       |
| 60 |                                         |      |       |

|    |                                     |      |        |
|----|-------------------------------------|------|--------|
| 1  |                                     |      |        |
| 2  |                                     |      |        |
| 3  | Hypertrophic Cardiomyopathy         | 1779 | 0.06%  |
| 4  | Oesophageal varices                 | 1716 | 0.06%  |
| 5  | Plasma Cell Malignancy              | 1610 | 0.05%  |
| 6  | Scleroderma                         | 1566 | 0.05%  |
| 7  | Pericardial Effusion                | 1509 | 0.05%  |
| 8  | Myasthenia gravis                   | 1407 | 0.05%  |
| 9  | Primary pulmonary hypertension      | 1345 | 0.04%  |
| 10 | Sick sinus syndrome                 | 1231 | 0.04%  |
| 11 | Aplastic anaemias                   | 1172 | 0.04%  |
| 12 | Primary Malignancy: Brain           | 1131 | 0.04%  |
| 13 | Immunodeficiencies                  | 1071 | 0.03%  |
| 14 | Cystic Fibrosis                     | 985  | 0.03%  |
| 15 | Primary Malignancy: Oesophageal     | 955  | 0.03%  |
| 16 | Myelodysplastic Syndrome            | 927  | 0.03%  |
| 17 | Portal hypertension                 | 919  | 0.03%  |
| 18 | Sickle Cell Disease                 | 887  | 0.03%  |
| 19 | Secondary pulmonary hypertension    | 824  | 0.03%  |
| 20 | Angiodysplasia of colon             | 777  | 0.02%  |
| 21 | Primary Malignancy: Bone            | 741  | 0.02%  |
| 22 | Primary Malignancy: Stomach         | 694  | 0.02%  |
| 23 | Hepatic failure                     | 632  | 0.02%  |
| 24 | Secondary Malignancy: Lymph Nodes   | 565  | 0.02%  |
| 25 | Secondary Malignancy: Liver         | 491  | 0.02%  |
| 26 | Tubulo-interstitial nephritis       | 365  | 0.01%  |
| 27 | Motor neurone disease               | 347  | 0.01%  |
| 28 | Primary Malignancy: Pancreas        | 302  | 0.01%  |
| 29 | Enteropathic arthropathy            | 291  | 0.01%  |
| 30 | Primary Malignancy: Liver           | 233  | 0.01%  |
| 31 | Secondary Malignancy: Lung          | 223  | 0.01%  |
| 32 | Secondary Malignancy: Bone          | 187  | 0.01%  |
| 33 | Primary Malignancy: Biliary Tract   | 129  | <0.01% |
| 34 | Secondary Malignancy: Brain         | 50   | <0.01% |
| 35 | Secondary Malignancy: Peritoneum    | 24   | <0.01% |
| 36 | Secondary Malignancy: Bowel         | 11   | <0.01% |
| 37 | Secondary Malignancy: Adrenal Gland | *    | <0.01% |
| 38 | Primary Malignancy: Multiple Sites  | *    | <0.01% |
| 39 | Primary Malignancy: Mesothelioma    | *    | <0.01% |
| 40 | Secondary Malignancy: Pleura        | *    | <0.01% |
| 41 |                                     |      |        |
| 42 |                                     |      |        |
| 43 |                                     |      |        |
| 44 |                                     |      |        |
| 45 |                                     |      |        |
| 46 |                                     |      |        |
| 47 |                                     |      |        |
| 48 |                                     |      |        |
| 49 |                                     |      |        |
| 50 |                                     |      |        |
| 51 |                                     |      |        |
| 52 |                                     |      |        |
| 53 |                                     |      |        |
| 54 |                                     |      |        |
| 55 |                                     |      |        |
| 56 |                                     |      |        |
| 57 |                                     |      |        |
| 58 |                                     |      |        |
| 59 |                                     |      |        |
| 60 |                                     |      |        |

\* diseases with frequency <10 suppressed as small counts

**Table A3: characteristics of the 3,060,391 ineligible patients with no incident diseases over the study period**

| <b>Patient characteristic</b> | <b>Total</b>   | <b>Percent</b> |
|-------------------------------|----------------|----------------|
| <b>Age (years)</b>            |                |                |
| 18-40                         | 1476341        | 48.2%          |
| 40-49                         | 689779         | 22.5%          |
| 50-59                         | 435517         | 14.2%          |
| 60-69                         | 291093         | 9.5%           |
| 70-79                         | 129375         | 4.2%           |
| 80+                           | 38286          | 1.3%           |
| <b>Gender</b>                 |                |                |
| Female                        | 1357049        | 44.3%          |
| Male                          | 1703284        | 55.7%          |
| Indeterminate                 | 58             | 0.0%           |
| <b>Total</b>                  | <b>3060391</b> |                |



**Table A4: distribution of yearly codes over the whole follow-up period for each condition, ordered by median**

| Disease                                          | 5 <sup>th</sup> centile | Median | 95 <sup>th</sup> centile | Mean | Standard deviation |
|--------------------------------------------------|-------------------------|--------|--------------------------|------|--------------------|
| Diabetes Mellitus_other or not specified         | 0.00                    | 2.99   | 6.88                     | 3.08 | 2.22               |
| Polymyalgia Rheumatica                           | 0.00                    | 1.05   | 6.32                     | 1.82 | 2.29               |
| Motor neurone disease                            | 0.00                    | 0.95   | 12.15                    | 2.86 | 5.41               |
| Dementia                                         | 0.00                    | 0.93   | 4.36                     | 1.39 | 1.80               |
| Type 2 Diabetes Mellitus                         | 0.00                    | 0.89   | 4.59                     | 1.41 | 1.73               |
| Type 1 Diabetes Mellitus                         | 0.00                    | 0.88   | 6.31                     | 1.71 | 2.41               |
| Depression                                       | 0.00                    | 0.83   | 4.54                     | 1.36 | 1.76               |
| COPD                                             | 0.00                    | 0.77   | 3.77                     | 1.17 | 1.43               |
| Heart failure                                    | 0.00                    | 0.73   | 5.48                     | 1.46 | 2.21               |
| Rheumatoid Arthritis                             | 0.00                    | 0.70   | 5.50                     | 1.43 | 2.23               |
| Primary Malignancy_Mesothelioma                  | 0.00                    | 0.67   | 9.16                     | 1.78 | 3.18               |
| Primary Malignancy_Pancreas                      | 0.00                    | 0.67   | 13.41                    | 2.63 | 5.12               |
| Primary Malignancy_Brain                         | 0.00                    | 0.66   | 10.60                    | 2.15 | 3.96               |
| Primary Malignancy_Oesophageal                   | 0.00                    | 0.64   | 10.86                    | 2.44 | 4.95               |
| Myasthenia gravis                                | 0.00                    | 0.62   | 5.61                     | 1.48 | 2.66               |
| Multiple sclerosis                               | 0.00                    | 0.59   | 5.63                     | 1.40 | 2.41               |
| Parkinson's disease                              | 0.00                    | 0.59   | 4.52                     | 1.20 | 1.77               |
| Vitamin B12 deficiency anaemia                   | 0.00                    | 0.56   | 4.60                     | 1.24 | 1.67               |
| Bipolar affective disorder and mania             | 0.00                    | 0.56   | 4.99                     | 1.30 | 2.15               |
| Plasma Cell Malignancy                           | 0.00                    | 0.54   | 10.32                    | 2.15 | 4.67               |
| Hypertension                                     | 0.00                    | 0.54   | 2.95                     | 0.88 | 1.12               |
| Atrial Fibrillation                              | 0.00                    | 0.51   | 3.47                     | 0.97 | 1.47               |
| Primary Malignancy_Prostate                      | 0.00                    | 0.51   | 6.11                     | 1.46 | 2.48               |
| Intellectual disability                          | 0.00                    | 0.49   | 5.19                     | 1.47 | 1.91               |
| Primary Malignancy_Lung                          | 0.00                    | 0.45   | 8.17                     | 1.73 | 3.55               |
| Primary Malignancy_Biliary Tract                 | 0.00                    | 0.45   | 8.96                     | 1.89 | 4.73               |
| Giant Cell arteritis                             | 0.00                    | 0.44   | 5.73                     | 1.36 | 2.47               |
| Crohn's disease                                  | 0.00                    | 0.42   | 5.41                     | 1.24 | 2.32               |
| Primary Malignancy_Breast                        | 0.00                    | 0.39   | 5.25                     | 1.21 | 2.47               |
| Hodgkin Lymphoma                                 | 0.00                    | 0.38   | 5.41                     | 1.24 | 2.55               |
| Ulcerative colitis                               | 0.00                    | 0.38   | 4.27                     | 1.00 | 1.87               |
| Primary Malignancy_Oropharyngeal                 | 0.00                    | 0.37   | 6.84                     | 1.44 | 2.95               |
| Non-Hodgkin Lymphoma                             | 0.00                    | 0.37   | 5.52                     | 1.22 | 2.53               |
| Leukaemia                                        | 0.00                    | 0.37   | 5.19                     | 1.17 | 2.58               |
| Secondary Malignancy_Brain                       | 0.00                    | 0.37   | 7.68                     | 1.45 | 2.74               |
| Stroke_not otherwise specified                   | 0.00                    | 0.34   | 2.11                     | 0.59 | 0.89               |
| Idiopathic Intracranial Hypertension             | 0.00                    | 0.34   | 3.81                     | 0.92 | 1.76               |
| Thyroid Disease                                  | 0.00                    | 0.33   | 2.56                     | 0.68 | 1.16               |
| Asthma                                           | 0.00                    | 0.32   | 2.33                     | 0.63 | 0.99               |
| Primary Malignancy_Stomach                       | 0.00                    | 0.32   | 6.93                     | 1.45 | 3.30               |
| Chronic primary pain                             | 0.00                    | 0.32   | 3.23                     | 0.79 | 1.34               |
| Coronary Heart Disease (not otherwise specified) | 0.00                    | 0.31   | 2.02                     | 0.56 | 0.85               |
| Epilepsy                                         | 0.00                    | 0.31   | 3.66                     | 0.92 | 1.95               |
| Psoriatic Arthritis                              | 0.00                    | 0.30   | 3.68                     | 0.87 | 1.63               |

1  
2  
3  
4  
5  
6  
7  
8  
9  
10  
11  
12  
13  
14  
15  
16  
17  
18  
19  
20  
21  
22  
23  
24  
25  
26  
27  
28  
29  
30  
31  
32  
33  
34  
35  
36  
37  
38  
39  
40  
41  
42  
43  
44  
45  
46  
47  
48  
49  
50  
51  
52  
53  
54  
55  
56  
57  
58  
59  
60

|                                   |      |      |      |      |      |
|-----------------------------------|------|------|------|------|------|
| Chronic Fatigue Syndrome          | 0.00 | 0.29 | 3.22 | 0.76 | 1.31 |
| Primary Malignancy_Bowel          | 0.00 | 0.29 | 5.25 | 1.15 | 2.88 |
| Anxiety disorders                 | 0.00 | 0.29 | 2.99 | 0.73 | 1.29 |
| Primary Malignancy_Thyroid        | 0.00 | 0.28 | 4.05 | 0.88 | 1.76 |
| Personality disorders             | 0.00 | 0.28 | 4.35 | 0.99 | 2.05 |
| Schizophrenia                     | 0.00 | 0.27 | 3.36 | 0.78 | 1.52 |
| Primary Malignancy_Cervix         | 0.00 | 0.27 | 5.26 | 1.17 | 2.77 |
| Autoimmune liver disease          | 0.00 | 0.26 | 3.63 | 0.85 | 1.82 |
| Myelodysplastic Syndrome          | 0.00 | 0.26 | 4.88 | 1.15 | 2.95 |
| Bronchiectasis                    | 0.00 | 0.24 | 3.03 | 0.70 | 1.31 |
| Hyperkinetic disorders            | 0.00 | 0.24 | 3.11 | 0.72 | 1.34 |
| Primary Malignancy_Ovary          | 0.00 | 0.24 | 6.15 | 1.24 | 2.87 |
| Primary Malignancy_Liver          | 0.00 | 0.23 | 3.64 | 0.95 | 2.99 |
| Coeliac disease                   | 0.00 | 0.23 | 2.13 | 0.52 | 0.85 |
| Lupus Erythematosus               | 0.00 | 0.22 | 3.52 | 0.83 | 1.87 |
| Myocardial Infarction             | 0.00 | 0.21 | 2.44 | 0.58 | 1.04 |
| Primary Malignancy_Bone           | 0.00 | 0.21 | 4.03 | 0.97 | 3.29 |
| Secondary Malignancy_other        | 0.00 | 0.21 | 5.92 | 1.18 | 2.65 |
| Peripheral Vascular Disease       | 0.00 | 0.20 | 2.73 | 0.75 | 2.53 |
| Ankylosing spondylitis            | 0.00 | 0.20 | 3.00 | 0.69 | 1.47 |
| Primary Malignancy_Bladder        | 0.00 | 0.20 | 4.38 | 0.90 | 2.05 |
| Primary Malignancy_Testis         | 0.00 | 0.20 | 3.58 | 0.81 | 1.50 |
| Sarcoidosis                       | 0.00 | 0.19 | 3.36 | 0.72 | 1.53 |
| Abdominal Hernia                  | 0.00 | 0.19 | 1.55 | 0.40 | 0.68 |
| Secondary Malignancy_Peritoneum   | 0.00 | 0.19 | 4.21 | 1.30 | 3.31 |
| Scleroderma                       | 0.00 | 0.19 | 3.00 | 0.71 | 1.88 |
| Primary Malignancy_Melanoma       | 0.00 | 0.18 | 3.06 | 0.67 | 1.71 |
| Gout                              | 0.00 | 0.17 | 1.74 | 0.43 | 0.73 |
| Barrett's oesophagus              | 0.00 | 0.16 | 1.40 | 0.35 | 0.57 |
| Glomerulonephritis                | 0.00 | 0.16 | 3.26 | 0.74 | 1.69 |
| Osteoporosis                      | 0.00 | 0.15 | 1.52 | 0.38 | 0.65 |
| Primary Malignancy_Uterus         | 0.00 | 0.15 | 3.90 | 0.81 | 2.16 |
| Cirrhosis                         | 0.00 | 0.15 | 2.88 | 0.63 | 1.40 |
| Diabetic Eye Disease              | 0.00 | 0.15 | 1.61 | 0.40 | 0.68 |
| Intracerebral haemorrhage         | 0.00 | 0.15 | 2.58 | 0.56 | 1.10 |
| Primary Malignancy_Kidney         | 0.00 | 0.14 | 2.93 | 0.66 | 1.67 |
| Dilated cardiomyopathy            | 0.00 | 0.14 | 1.99 | 0.46 | 0.93 |
| Eating Disorders                  | 0.00 | 0.14 | 4.03 | 0.84 | 2.38 |
| Abdominal Aortic Aneurysm         | 0.00 | 0.00 | 1.35 | 0.26 | 0.58 |
| Acne                              | 0.00 | 0.00 | 1.26 | 0.30 | 0.50 |
| Alcohol Misuse                    | 0.00 | 0.00 | 0.94 | 0.20 | 0.66 |
| Alcoholic liver disease           | 0.00 | 0.00 | 1.90 | 0.42 | 1.09 |
| Allergic and chronic rhinitis     | 0.00 | 0.00 | 0.56 | 0.10 | 0.27 |
| Alopecia areata                   | 0.00 | 0.00 | 0.87 | 0.17 | 0.45 |
| Anaemia_other                     | 0.00 | 0.00 | 1.49 | 0.33 | 0.78 |
| Angiodysplasia of colon           | 0.00 | 0.00 | 0.87 | 0.17 | 0.49 |
| Anterior and Intermediate Uveitis | 0.00 | 0.00 | 1.18 | 0.25 | 0.66 |
| Aplastic anaemias                 | 0.00 | 0.00 | 2.19 | 0.47 | 1.42 |
| Asbestosis                        | 0.00 | 0.00 | 0.96 | 0.20 | 0.65 |
| Atrioventricular blocks           | 0.00 | 0.00 | 0.64 | 0.11 | 0.33 |

|    |                                         |      |      |      |      |      |
|----|-----------------------------------------|------|------|------|------|------|
| 1  |                                         |      |      |      |      |      |
| 2  |                                         |      |      |      |      |      |
| 3  | Autism and Asperger's syndrome          | 0.00 | 0.00 | 1.10 | 0.25 | 0.58 |
| 4  | Autonomic Neuropathy                    | 0.00 | 0.00 | 2.46 | 0.47 | 1.34 |
| 5  | Benign Prostatic Hyperplasia            | 0.00 | 0.00 | 1.08 | 0.25 | 0.50 |
| 6  | Benign essential tremor                 | 0.00 | 0.00 | 1.11 | 0.22 | 0.53 |
| 7  | Cardiomyopathy_other                    | 0.00 | 0.00 | 1.94 | 0.41 | 0.90 |
| 8  | Cataract                                | 0.00 | 0.00 | 1.16 | 0.27 | 0.50 |
| 9  | Cerebral Palsy                          | 0.00 | 0.00 | 0.73 | 0.16 | 0.48 |
| 10 | Chronic Cystitis                        | 0.00 | 0.00 | 1.88 | 0.37 | 1.03 |
| 11 | Chronic Kidney Disease                  | 0.00 | 0.00 | 1.16 | 0.26 | 0.65 |
| 12 | Chronic sinusitis                       | 0.00 | 0.00 | 0.72 | 0.13 | 0.39 |
| 13 | Chronic viral hepatitis                 | 0.00 | 0.00 | 1.89 | 0.40 | 0.90 |
| 14 | Collapsed vertebra                      | 0.00 | 0.00 | 1.64 | 0.34 | 0.77 |
| 15 | Congenital Septal Defect                | 0.00 | 0.00 | 1.21 | 0.24 | 0.62 |
| 16 | Cystic Fibrosis                         | 0.00 | 0.00 | 2.21 | 0.31 | 1.00 |
| 17 | Dermatitis                              | 0.00 | 0.00 | 0.76 | 0.15 | 0.43 |
| 18 | Diabetic Neuropathy                     | 0.00 | 0.00 | 1.62 | 0.38 | 1.44 |
| 19 | Diaphragmatic hernia                    | 0.00 | 0.00 | 0.81 | 0.17 | 0.38 |
| 20 | Diverticular Disease                    | 0.00 | 0.00 | 0.96 | 0.20 | 0.51 |
| 21 | Down's syndrome                         | 0.00 | 0.00 | 0.48 | 0.10 | 0.19 |
| 22 | Dysmenorrhoea                           | 0.00 | 0.00 | 0.78 | 0.15 | 0.38 |
| 23 | Endometrial hyperplasia and hypertrophy | 0.00 | 0.00 | 0.90 | 0.17 | 0.57 |
| 24 | Endometriosis                           | 0.00 | 0.00 | 2.08 | 0.44 | 1.06 |
| 25 | Enteropathic arthropathy                | 0.00 | 0.00 | 1.28 | 0.38 | 0.99 |
| 26 | Enthesopathy and synovial disorder      | 0.00 | 0.00 | 0.86 | 0.18 | 0.43 |
| 27 | Fatty Liver                             | 0.00 | 0.00 | 0.75 | 0.14 | 0.34 |
| 28 | Fibromatosis                            | 0.00 | 0.00 | 0.85 | 0.17 | 0.39 |
| 29 | Folate deficiency anaemia               | 0.00 | 0.00 | 0.52 | 0.09 | 0.25 |
| 30 | Gastritis and duodenitis                | 0.00 | 0.00 | 0.73 | 0.14 | 0.39 |
| 31 | Gastro-oesophageal reflux disease       | 0.00 | 0.00 | 0.88 | 0.18 | 0.43 |
| 32 | Glaucoma                                | 0.00 | 0.00 | 1.46 | 0.31 | 0.62 |
| 33 | HIV                                     | 0.00 | 0.00 | 2.07 | 0.41 | 0.92 |
| 34 | Hearing loss                            | 0.00 | 0.00 | 0.77 | 0.16 | 0.34 |
| 35 | Hepatic failure                         | 0.00 | 0.00 | 2.22 | 0.46 | 1.07 |
| 36 | Hidradenitis suppurativa                | 0.00 | 0.00 | 1.92 | 0.43 | 1.11 |
| 37 | Hyperparathyroidism                     | 0.00 | 0.00 | 1.84 | 0.41 | 0.84 |
| 38 | Hypersplenism                           | 0.00 | 0.00 | 0.99 | 0.21 | 0.58 |
| 39 | Hypertrophic Cardiomyopathy             | 0.00 | 0.00 | 2.23 | 0.49 | 1.00 |
| 40 | Hypertrophic Nasal Turbinates           | 0.00 | 0.00 | 0.28 | 0.04 | 0.16 |
| 41 | Hyposplenism                            | 0.00 | 0.00 | 1.50 | 0.34 | 0.71 |
| 42 | Immunodeficiencies                      | 0.00 | 0.00 | 1.62 | 0.36 | 1.11 |
| 43 | Intervertebral disc disorders           | 0.00 | 0.00 | 1.75 | 0.36 | 0.91 |
| 44 | Irritable bowel syndrome                | 0.00 | 0.00 | 0.66 | 0.13 | 0.32 |
| 45 | Ischaemic stroke                        | 0.00 | 0.00 | 2.03 | 0.46 | 0.99 |
| 46 | Left bundle branch block                | 0.00 | 0.00 | 0.77 | 0.15 | 0.39 |
| 47 | Macular degeneration                    | 0.00 | 0.00 | 1.16 | 0.25 | 0.71 |
| 48 | Meniere's Disease                       | 0.00 | 0.00 | 1.58 | 0.33 | 0.77 |
| 49 | Migraine                                | 0.00 | 0.00 | 1.21 | 0.25 | 0.61 |
| 50 | Multiple valve disorder                 | 0.00 | 0.00 | 0.49 | 0.09 | 0.33 |
| 51 | Neuropathic Bladder                     | 0.00 | 0.00 | 0.74 | 0.15 | 0.36 |
| 52 |                                         |      |      |      |      |      |
| 53 |                                         |      |      |      |      |      |
| 54 |                                         |      |      |      |      |      |
| 55 |                                         |      |      |      |      |      |
| 56 |                                         |      |      |      |      |      |
| 57 |                                         |      |      |      |      |      |
| 58 |                                         |      |      |      |      |      |
| 59 |                                         |      |      |      |      |      |
| 60 |                                         |      |      |      |      |      |

1  
2  
3  
4  
5  
6  
7  
8  
9  
10  
11  
12  
13  
14  
15  
16  
17  
18  
19  
20  
21  
22  
23  
24  
25  
26  
27  
28  
29  
30  
31  
32  
33  
34  
35  
36  
37  
38  
39  
40  
41  
42  
43  
44  
45  
46  
47  
48  
49  
50  
51  
52  
53  
54  
55  
56  
57  
58  
59  
60

|                                        |      |      |      |      |      |
|----------------------------------------|------|------|------|------|------|
| Nonrheumatic aortic valve disorders    | 0.00 | 0.00 | 1.42 | 0.31 | 0.68 |
| Nonrheumatic mitral valve disorders    | 0.00 | 0.00 | 0.84 | 0.16 | 0.52 |
| Obesity                                | 0.00 | 0.00 | 0.71 | 0.15 | 0.44 |
| Obsessive-compulsive disorder          | 0.00 | 0.00 | 2.55 | 0.56 | 1.21 |
| Obstructive and reflux uropathy        | 0.00 | 0.00 | 1.10 | 0.23 | 0.63 |
| Oesophageal varices                    | 0.00 | 0.00 | 1.62 | 0.38 | 0.74 |
| Osteoarthritis (excl spine)            | 0.00 | 0.00 | 1.53 | 0.34 | 0.70 |
| Other haemolytic anaemias              | 0.00 | 0.00 | 3.09 | 0.62 | 1.64 |
| Pancreatitis                           | 0.00 | 0.00 | 2.00 | 0.44 | 1.09 |
| Pericardial Effusion                   | 0.00 | 0.00 | 1.12 | 0.21 | 0.56 |
| Peripheral Neuropathy                  | 0.00 | 0.00 | 1.22 | 0.26 | 0.81 |
| Pleural effusion                       | 0.00 | 0.00 | 1.55 | 0.32 | 0.90 |
| Pleural plaque                         | 0.00 | 0.00 | 0.74 | 0.14 | 0.48 |
| Polycystic ovarian syndrome            | 0.00 | 0.00 | 0.86 | 0.20 | 0.34 |
| Polycythaemia vera                     | 0.00 | 0.00 | 2.49 | 0.54 | 1.30 |
| Portal hypertension                    | 0.00 | 0.00 | 0.91 | 0.18 | 0.46 |
| Posterior Uveitis                      | 0.00 | 0.00 | 1.46 | 0.33 | 1.02 |
| Primary Malignancy_Multiple Sites      | 0.00 | 0.00 | 0.00 | 0.00 | 0.00 |
| Primary Malignancy_Skin                | 0.00 | 0.00 | 1.30 | 0.31 | 0.78 |
| Primary Malignancy_other               | 0.00 | 0.00 | 4.42 | 0.90 | 2.44 |
| Primary Thrombocytopaenia              | 0.00 | 0.00 | 2.41 | 0.59 | 1.96 |
| Primary pulmonary hypertension         | 0.00 | 0.00 | 1.62 | 0.32 | 1.00 |
| Psoriasis                              | 0.00 | 0.00 | 1.44 | 0.32 | 0.75 |
| Pulmonary Fibrosis                     | 0.00 | 0.00 | 2.38 | 0.53 | 1.34 |
| Raynaud's syndrome                     | 0.00 | 0.00 | 0.85 | 0.16 | 0.45 |
| Retinal vascular occlusions            | 0.00 | 0.00 | 1.93 | 0.42 | 0.93 |
| Rheumatic Valve Disorder               | 0.00 | 0.00 | 0.70 | 0.13 | 0.41 |
| Right bundle branch block combinations | 0.00 | 0.00 | 0.47 | 0.08 | 0.25 |
| Rosacea                                | 0.00 | 0.00 | 0.93 | 0.20 | 0.41 |
| Scleritis and episcleritis             | 0.00 | 0.00 | 0.70 | 0.13 | 0.49 |
| Seborrheic dermatitis                  | 0.00 | 0.00 | 0.61 | 0.11 | 0.31 |
| Secondary Malignancy_Adrenal Gland     | 0.00 | 0.00 | 1.68 | 0.42 | 1.01 |
| Secondary Malignancy_Bone              | 0.00 | 0.00 | 4.78 | 0.93 | 2.34 |
| Secondary Malignancy_Bowel             | 0.00 | 0.00 | 6.36 | 1.41 | 2.42 |
| Secondary Malignancy_Liver             | 0.00 | 0.00 | 4.82 | 0.91 | 2.26 |
| Secondary Malignancy_Lung              | 0.00 | 0.00 | 6.04 | 1.10 | 2.27 |
| Secondary Malignancy_Lymph Nodes       | 0.00 | 0.00 | 2.40 | 0.40 | 1.31 |
| Secondary Malignancy_Pleura            | 0.00 | 0.00 | 5.69 | 0.94 | 2.50 |
| Secondary Thrombocytopaenia            | 0.00 | 0.00 | 0.89 | 0.19 | 0.48 |
| Secondary polycythaemia                | 0.00 | 0.00 | 1.64 | 0.32 | 0.78 |
| Secondary pulmonary hypertension       | 0.00 | 0.00 | 1.29 | 0.27 | 0.83 |
| Sick sinus syndrome                    | 0.00 | 0.00 | 0.79 | 0.14 | 0.40 |
| Sickle Cell Disease                    | 0.00 | 0.00 | 0.98 | 0.29 | 1.07 |
| Sjogren's Syndrome                     | 0.00 | 0.00 | 1.48 | 0.31 | 0.68 |
| Sleep apnoea                           | 0.00 | 0.00 | 0.92 | 0.19 | 0.43 |
| Spina bifida                           | 0.00 | 0.00 | 0.48 | 0.11 | 0.44 |
| Spinal stenosis                        | 0.00 | 0.00 | 2.34 | 0.50 | 1.06 |
| Spondylolisthesis                      | 0.00 | 0.00 | 1.22 | 0.23 | 0.63 |
| Spondylosis                            | 0.00 | 0.00 | 1.01 | 0.21 | 0.57 |
| Stable Angina                          | 0.00 | 0.00 | 1.62 | 0.37 | 0.78 |

|                                         |      |      |      |      |      |
|-----------------------------------------|------|------|------|------|------|
| Subarachnoid haemorrhage                | 0.00 | 0.00 | 2.41 | 0.51 | 1.05 |
| Substance Misuse                        | 0.00 | 0.00 | 1.42 | 0.32 | 1.34 |
| Supraventricular tachycardia            | 0.00 | 0.00 | 1.55 | 0.35 | 0.78 |
| Thalassaemia                            | 0.00 | 0.00 | 0.31 | 0.05 | 0.19 |
| Thrombophilia                           | 0.00 | 0.00 | 0.75 | 0.15 | 0.53 |
| Tinnitus                                | 0.00 | 0.00 | 0.85 | 0.17 | 0.43 |
| Transient ischaemic attack              | 0.00 | 0.00 | 1.56 | 0.35 | 0.70 |
| Trigeminal neuralgia                    | 0.00 | 0.00 | 2.16 | 0.47 | 1.05 |
| Tubulo-interstitial nephritis           | 0.00 | 0.00 | 2.70 | 0.50 | 1.23 |
| Unstable Angina                         | 0.00 | 0.00 | 1.17 | 0.23 | 0.58 |
| Urinary Incontinence                    | 0.00 | 0.00 | 0.87 | 0.18 | 0.38 |
| Venous thromboembolic disease (Excl PE) | 0.00 | 0.00 | 1.85 | 0.41 | 1.05 |
| Ventricular tachycardia                 | 0.00 | 0.00 | 1.64 | 0.32 | 0.75 |
| Visual impairment and blindness         | 0.00 | 0.00 | 0.73 | 0.13 | 0.31 |
| Vitiligo                                | 0.00 | 0.00 | 0.73 | 0.14 | 0.32 |

1  
2  
3 **Figure A1: Boxplots of observed and expected mean yearly codes at a GP practice level**  
4 **for QOF conditions in year 1 (A) and year 2 (B) and non-QOF conditions in year 1 (C)**  
5 **and year 2 (D) following diagnosis**  
6  
7



Figure A2: ratio of mean yearly codes in year 1 following diagnosis to subsequent years for QOF conditions

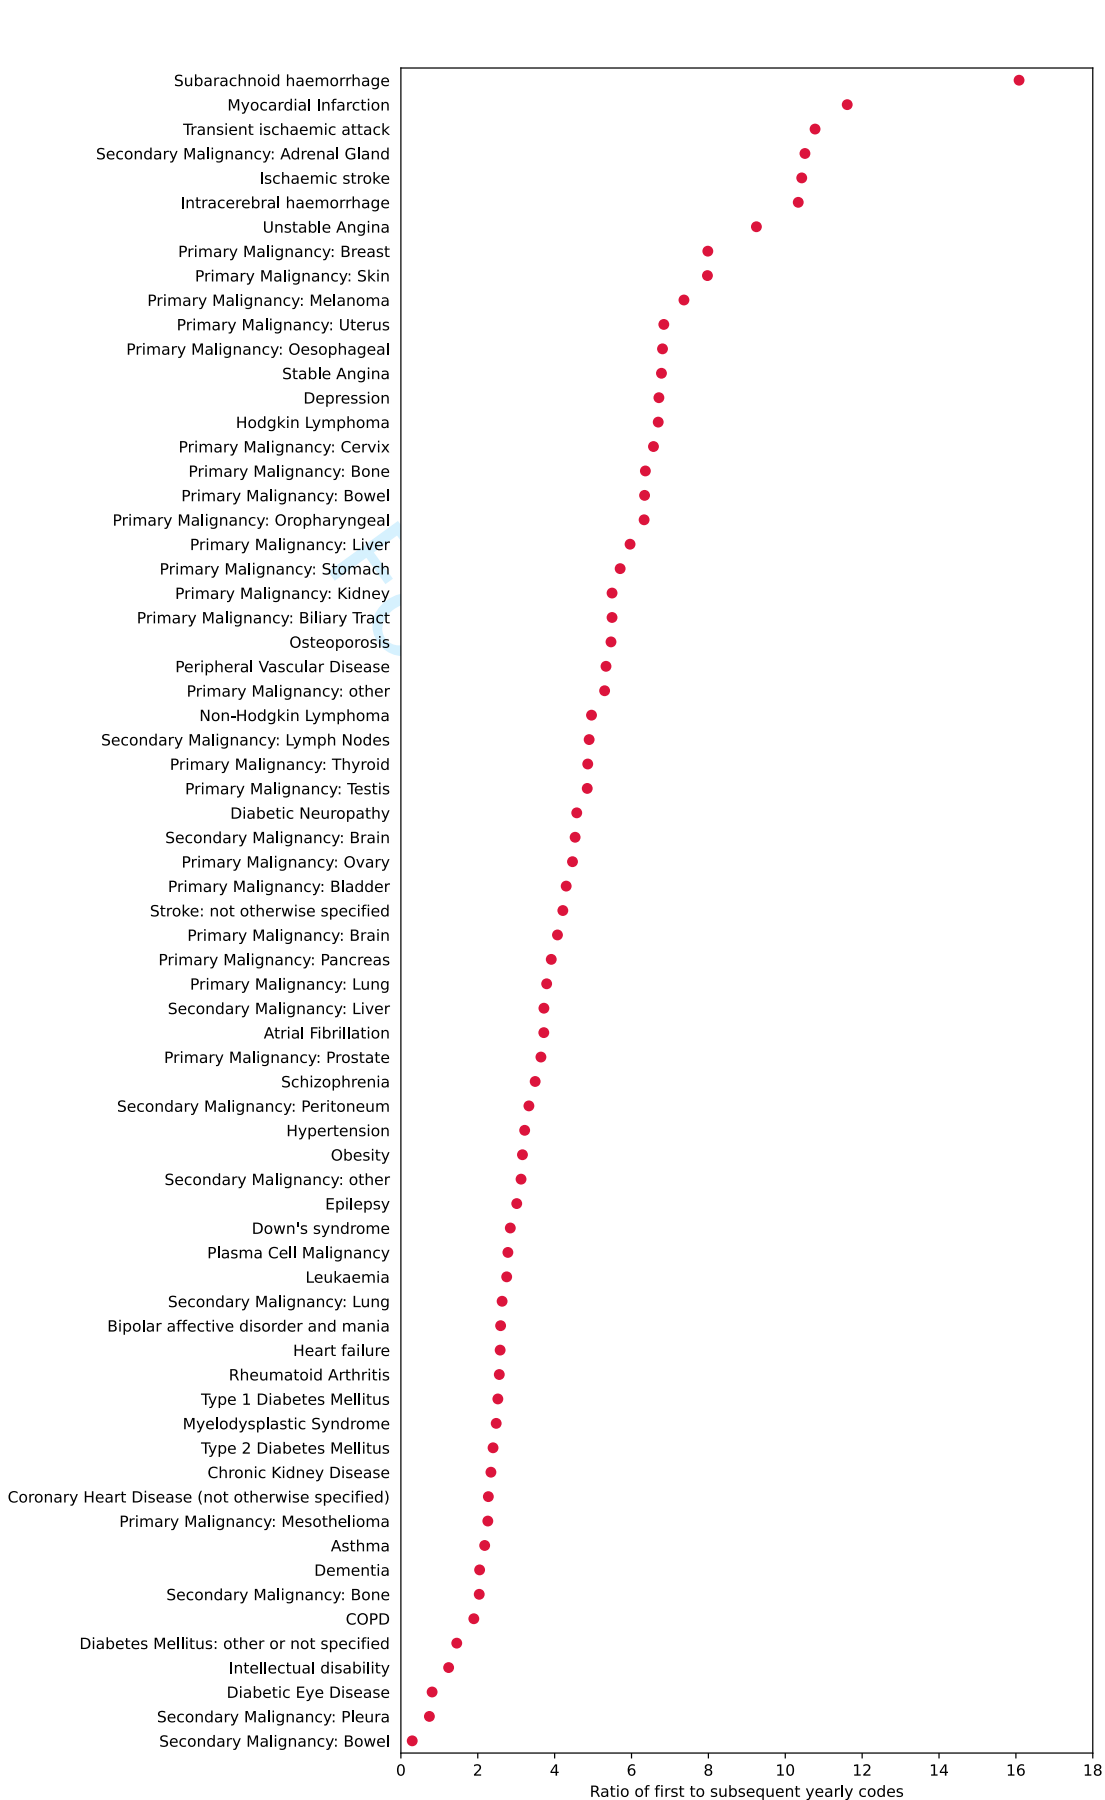

**Figure A3: Ratio of mean yearly codes in year 1 following diagnosis to subsequent years for non-QOF**

**conditions**

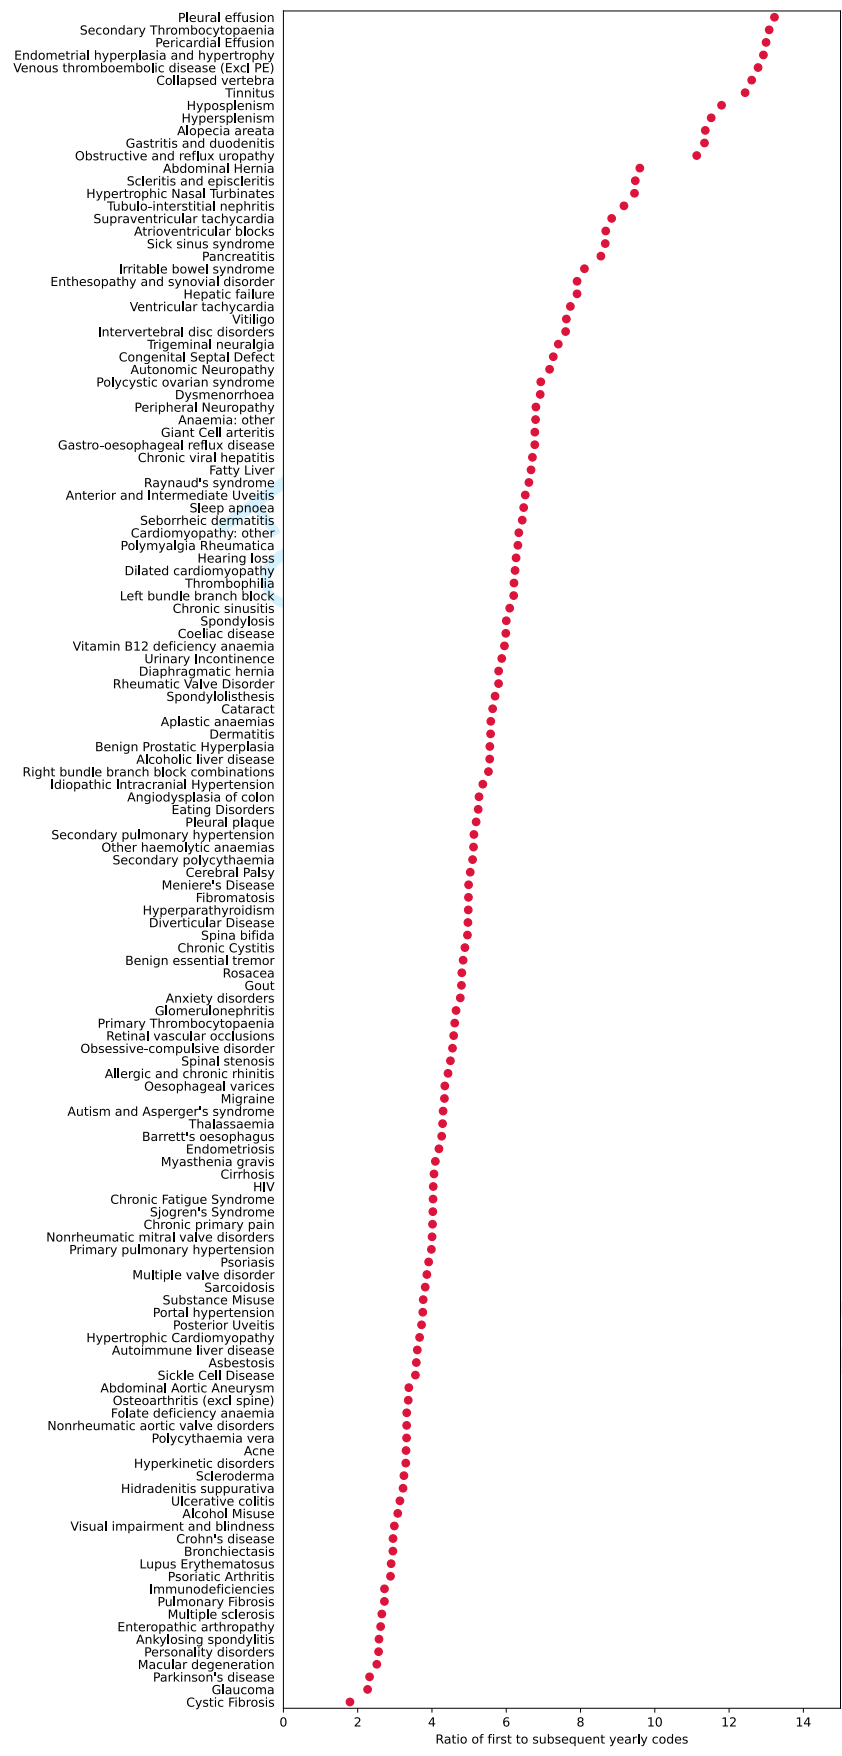



**Figure A4: Boxplots of the distribution of mean yearly codes following diagnosis for newly diagnosed conditions by GP practice stratified by inclusion in QOF**

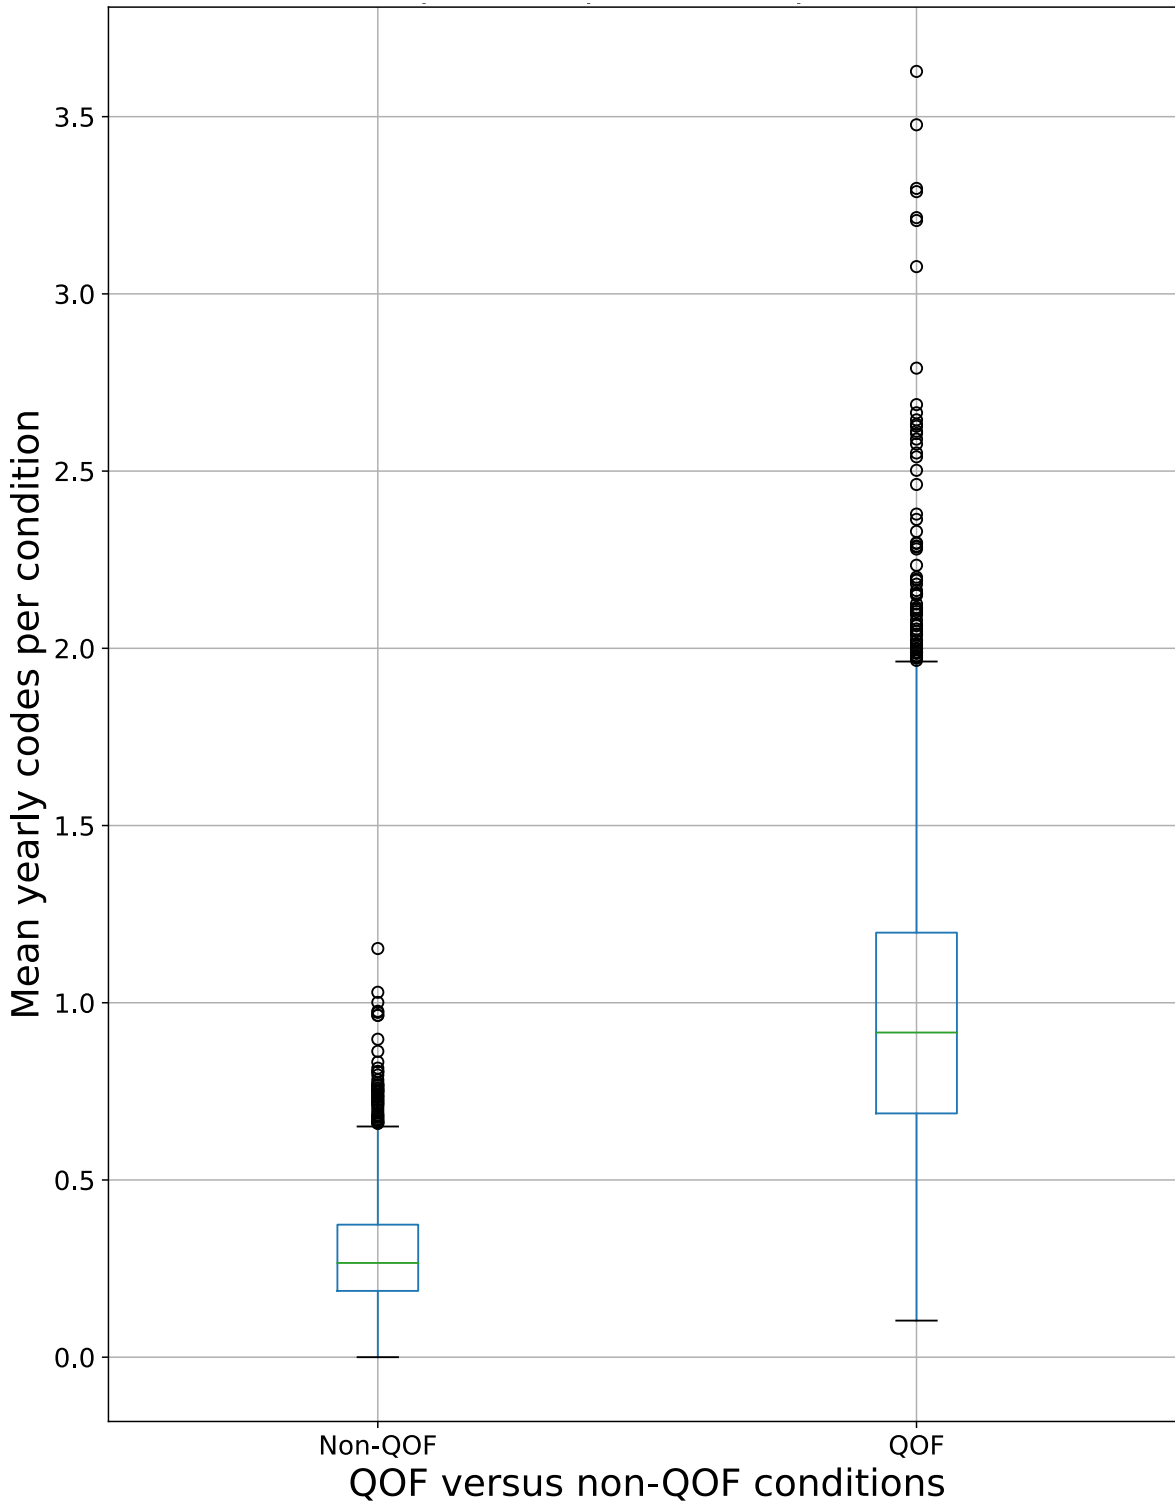

**Figure A5: boxplots of mean yearly codes at a GP practice level by practice level Index of Multiple Deprivation decile (1 = most deprived, 10 = least deprived)**

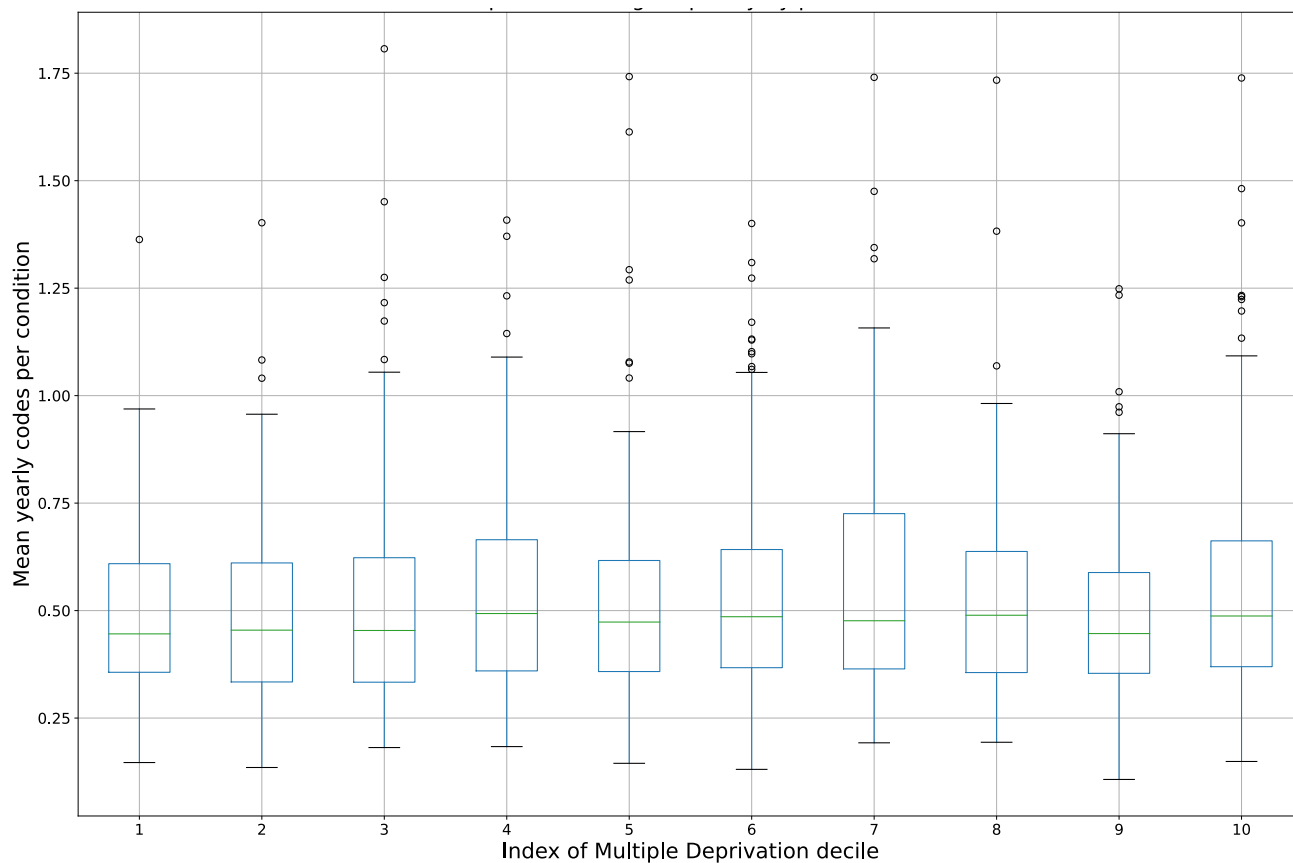

Footnote: combines QOF and non-QOF conditions

**Table A5: Associations of rate of codes in year one following diagnosis for conditions included in QOF (N=1730485)**

| Variable                                         | Primary analysis |         |        |       | Sensitivity analysis including consultation number |         |        |       |
|--------------------------------------------------|------------------|---------|--------|-------|----------------------------------------------------|---------|--------|-------|
|                                                  | IRR              | P-value | 95% CI |       | IRR                                                | P-value | 95% CI |       |
|                                                  |                  |         | Lower  | Upper |                                                    |         | Lower  | Upper |
| <b>Age category (years)</b>                      |                  |         |        |       |                                                    |         |        |       |
| Under 40                                         | 1.33             | 0.00    | 1.32   | 1.34  | 1.30                                               | 0.00    | 1.29   | 1.31  |
| 40-49                                            | 1.15             | 0.00    | 1.14   | 1.15  | 1.14                                               | 0.00    | 1.13   | 1.15  |
| 50-59                                            | 1.08             | 0.00    | 1.07   | 1.08  | 1.07                                               | 0.00    | 1.07   | 1.08  |
| 60-69 (reference)                                | -                | -       | -      | -     | -                                                  | -       | -      | -     |
| 70-79                                            | 0.96             | 0.00    | 0.95   | 0.96  | 0.94                                               | 0.00    | 0.93   | 0.95  |
| 80 or more                                       | 0.91             | 0.00    | 0.90   | 0.92  | 0.88                                               | 0.00    | 0.87   | 0.88  |
| <b>Sex</b>                                       |                  |         |        |       |                                                    |         |        |       |
| Female (reference)                               | -                | -       | -      | -     | -                                                  | -       | -      | -     |
| Male                                             | 1.03             | 0.00    | 1.02   | 1.03  | 1.10                                               | 0.00    | 1.10   | 1.11  |
| <b>Ethnicity category</b>                        |                  |         |        |       |                                                    |         |        |       |
| White (reference)                                | -                | -       | -      | -     | -                                                  | -       | -      | -     |
| South Asian                                      | 0.96             | 0.00    | 0.95   | 0.97  | 0.92                                               | 0.00    | 0.91   | 0.93  |
| Black                                            | 0.94             | 0.00    | 0.93   | 0.95  | 0.94                                               | 0.00    | 0.93   | 0.95  |
| Other                                            | 0.95             | 0.00    | 0.93   | 0.97  | 0.96                                               | 0.00    | 0.94   | 0.98  |
| Mixed                                            | 0.98             | 0.03    | 0.95   | 1.00  | 0.97                                               | 0.00    | 0.95   | 0.99  |
| Missing                                          | 0.98             | 0.00    | 0.97   | 0.99  | 1.01                                               | 0.00    | 1.00   | 1.02  |
| <b>IMD decile</b>                                |                  |         |        |       |                                                    |         |        |       |
| 1 (most deprived)                                | -                | -       | -      | -     | -                                                  | -       | -      | -     |
| 2                                                | 1.01             | 0.19    | 1.00   | 1.01  | 1.00                                               | 0.95    | 0.99   | 1.01  |
| 3                                                | 1.02             | 0.00    | 1.01   | 1.03  | 1.01                                               | 0.08    | 1.00   | 1.02  |
| 4                                                | 1.02             | 0.00    | 1.01   | 1.03  | 1.01                                               | 0.01    | 1.00   | 1.02  |
| 5                                                | 1.02             | 0.00    | 1.01   | 1.03  | 1.01                                               | 0.06    | 1.00   | 1.02  |
| 6                                                | 1.03             | 0.00    | 1.02   | 1.04  | 1.01                                               | 0.02    | 1.00   | 1.02  |
| 7                                                | 1.04             | 0.00    | 1.03   | 1.05  | 1.02                                               | 0.00    | 1.01   | 1.03  |
| 8                                                | 1.04             | 0.00    | 1.03   | 1.05  | 1.01                                               | 0.01    | 1.00   | 1.02  |
| 9                                                | 1.05             | 0.00    | 1.04   | 1.06  | 1.02                                               | 0.00    | 1.01   | 1.03  |
| 10 (least deprived)                              | 1.05             | 0.00    | 1.04   | 1.06  | 1.01                                               | 0.06    | 1.00   | 1.02  |
| <b>Number of QOF diseases</b>                    |                  |         |        |       |                                                    |         |        |       |
| 0 (reference)                                    | -                | -       | -      | -     | -                                                  | -       | -      | -     |
| 1                                                | 0.90             | 0.00    | 0.90   | 0.91  | 0.87                                               | 0.00    | 0.86   | 0.87  |
| 2                                                | 0.80             | 0.00    | 0.80   | 0.81  | 0.75                                               | 0.00    | 0.75   | 0.76  |
| 3                                                | 0.71             | 0.00    | 0.70   | 0.71  | 0.66                                               | 0.00    | 0.65   | 0.66  |
| 4 or more                                        | 0.63             | 0.00    | 0.62   | 0.63  | 0.56                                               | 0.00    | 0.55   | 0.56  |
| <b>Number of non-QOF diseases</b>                |                  |         |        |       |                                                    |         |        |       |
| 0 (reference)                                    | -                | -       | -      | -     | -                                                  | -       | -      | -     |
| 1                                                | 1.16             | 0.00    | 1.16   | 1.17  | 1.08                                               | 0.00    | 1.07   | 1.08  |
| 2                                                | 1.13             | 0.00    | 1.12   | 1.14  | 1.02                                               | 0.00    | 1.01   | 1.02  |
| 3                                                | 1.12             | 0.00    | 1.11   | 1.12  | 0.97                                               | 0.00    | 0.96   | 0.98  |
| 4 or more                                        | 1.13             | 0.00    | 1.12   | 1.13  | 0.90                                               | 0.00    | 0.89   | 0.90  |
| <b>Calendar year of diagnosis</b>                |                  |         |        |       |                                                    |         |        |       |
| 2015 (reference)                                 | -                | -       | -      | -     | -                                                  | -       | -      | -     |
| 2016                                             | 1.00             | 0.89    | 0.99   | 1.01  | 1.02                                               | 0.00    | 1.02   | 1.03  |
| 2017                                             | 1.00             | 0.34    | 1.00   | 1.01  | 1.05                                               | 0.00    | 1.04   | 1.05  |
| 2018                                             | 1.00             | 0.18    | 0.99   | 1.00  | 1.06                                               | 0.00    | 1.06   | 1.07  |
| 2019                                             | 0.95             | 0.00    | 0.94   | 0.96  | 1.04                                               | 0.00    | 1.04   | 1.05  |
| <b>Average number of consultations in year 1</b> |                  |         |        |       |                                                    |         |        |       |
| Less than 1 (reference)                          | -                | -       | -      | -     | -                                                  | -       | -      | -     |
| 1-2                                              | -                | -       | -      | -     | 1.62                                               | 0.00    | 1.60   | 1.63  |
| 3-4                                              | -                | -       | -      | -     | 2.21                                               | 0.00    | 2.19   | 2.23  |
| 5-9                                              | -                | -       | -      | -     | 2.87                                               | 0.00    | 2.84   | 2.89  |
| 10 or more                                       | -                | -       | -      | -     | 3.75                                               | 0.00    | 3.71   | 3.79  |

From negative binomial regression models, including practice-level fixed effects (not shown)

Table A6: Associations of rate of codes in year two following diagnosis for conditions included in QOF (N=1714684)

| Variable                                         | Primary analysis |         |        |       | Sensitivity analysis including consultation number |         |        |       |
|--------------------------------------------------|------------------|---------|--------|-------|----------------------------------------------------|---------|--------|-------|
|                                                  | IRR              | P-value | 95% CI |       | IRR                                                | P-value | 95% CI |       |
|                                                  |                  |         | Lower  | Upper |                                                    |         | Lower  | Upper |
| <b>Age category (years)</b>                      |                  |         |        |       |                                                    |         |        |       |
| Under 40                                         | 0.87             | 0.00    | 0.86   | 0.87  | 0.86                                               | 0.00    | 0.86   | 0.87  |
| 40-49                                            | 1.01             | 0.03    | 1.00   | 1.02  | 1.01                                               | 0.22    | 1.00   | 1.01  |
| 50-59                                            | 1.03             | 0.00    | 1.02   | 1.04  | 1.03                                               | 0.00    | 1.02   | 1.04  |
| 60-69 (reference)                                | -                | -       | -      | -     | -                                                  | -       | -      | -     |
| 70-79                                            | 0.95             | 0.00    | 0.94   | 0.96  | 0.93                                               | 0.00    | 0.93   | 0.94  |
| 80 or more                                       | 0.89             | 0.00    | 0.88   | 0.90  | 0.86                                               | 0.00    | 0.85   | 0.87  |
| <b>Sex</b>                                       |                  |         |        |       |                                                    |         |        |       |
| Female (reference)                               | -                | -       | -      | -     | -                                                  | -       | -      | -     |
| Male                                             | 1.11             | 0.00    | 1.11   | 1.12  | 1.18                                               | 0.00    | 1.17   | 1.18  |
| <b>Ethnicity category</b>                        |                  |         |        |       |                                                    |         |        |       |
| White (reference)                                | -                | -       | -      | -     | -                                                  | -       | -      | -     |
| South Asian                                      | 1.26             | 0.00    | 1.25   | 1.28  | 1.22                                               | 0.00    | 1.20   | 1.23  |
| Black                                            | 1.17             | 0.00    | 1.16   | 1.19  | 1.17                                               | 0.00    | 1.15   | 1.19  |
| Other                                            | 1.13             | 0.00    | 1.10   | 1.16  | 1.14                                               | 0.00    | 1.11   | 1.17  |
| Mixed                                            | 1.12             | 0.00    | 1.08   | 1.15  | 1.11                                               | 0.00    | 1.07   | 1.14  |
| Missing                                          | 0.89             | 0.00    | 0.88   | 0.90  | 0.93                                               | 0.00    | 0.92   | 0.93  |
| <b>IMD decile</b>                                |                  |         |        |       |                                                    |         |        |       |
| 1 (most deprived)                                | -                | -       | -      | -     | -                                                  | -       | -      | -     |
| 2                                                | 1.02             | 0.00    | 1.01   | 1.04  | 1.02                                               | 0.00    | 1.01   | 1.03  |
| 3                                                | 1.03             | 0.00    | 1.02   | 1.05  | 1.03                                               | 0.00    | 1.02   | 1.04  |
| 4                                                | 1.05             | 0.00    | 1.03   | 1.06  | 1.04                                               | 0.00    | 1.03   | 1.05  |
| 5                                                | 1.05             | 0.00    | 1.04   | 1.07  | 1.04                                               | 0.00    | 1.03   | 1.06  |
| 6                                                | 1.06             | 0.00    | 1.05   | 1.07  | 1.05                                               | 0.00    | 1.04   | 1.07  |
| 7                                                | 1.08             | 0.00    | 1.06   | 1.09  | 1.06                                               | 0.00    | 1.05   | 1.08  |
| 8                                                | 1.09             | 0.00    | 1.07   | 1.10  | 1.07                                               | 0.00    | 1.06   | 1.08  |
| 9                                                | 1.11             | 0.00    | 1.10   | 1.13  | 1.09                                               | 0.00    | 1.08   | 1.11  |
| 10 (least deprived)                              | 1.14             | 0.00    | 1.12   | 1.15  | 1.11                                               | 0.00    | 1.09   | 1.12  |
| <b>Number of QOF diseases</b>                    |                  |         |        |       |                                                    |         |        |       |
| 0 (reference)                                    | -                | -       | -      | -     | -                                                  | -       | -      | -     |
| 1                                                | 1.05             | 0.00    | 1.04   | 1.06  | 1.00                                               | 0.79    | 0.99   | 1.01  |
| 2                                                | 1.07             | 0.00    | 1.06   | 1.08  | 0.99                                               | 0.05    | 0.98   | 1.00  |
| 3                                                | 0.99             | 0.15    | 0.98   | 1.00  | 0.91                                               | 0.00    | 0.90   | 0.92  |
| 4 or more                                        | 0.87             | 0.00    | 0.86   | 0.88  | 0.77                                               | 0.00    | 0.76   | 0.78  |
| <b>Number of non-QOF diseases</b>                |                  |         |        |       |                                                    |         |        |       |
| 0 (reference)                                    | -                | -       | -      | -     | -                                                  | -       | -      | -     |
| 1                                                | 1.05             | 0.00    | 1.04   | 1.06  | 0.99                                               | 0.11    | 0.98   | 1.00  |
| 2                                                | 1.04             | 0.00    | 1.03   | 1.05  | 0.96                                               | 0.00    | 0.95   | 0.97  |
| 3                                                | 1.04             | 0.00    | 1.03   | 1.05  | 0.93                                               | 0.00    | 0.92   | 0.94  |
| 4 or more                                        | 1.05             | 0.00    | 1.04   | 1.06  | 0.88                                               | 0.00    | 0.87   | 0.89  |
| <b>Calendar year of diagnosis</b>                |                  |         |        |       |                                                    |         |        |       |
| 2015 (reference)                                 | -                | -       | -      | -     | -                                                  | -       | -      | -     |
| 2016                                             | 1.00             | 0.45    | 0.99   | 1.01  | 1.02                                               | 0.00    | 1.01   | 1.03  |
| 2017                                             | 0.99             | 0.00    | 0.98   | 0.99  | 1.02                                               | 0.00    | 1.01   | 1.03  |
| 2018                                             | 0.91             | 0.00    | 0.90   | 0.92  | 0.96                                               | 0.00    | 0.95   | 0.97  |
| 2019                                             | 0.79             | 0.00    | 0.79   | 0.80  | 0.86                                               | 0.00    | 0.86   | 0.87  |
| <b>Average number of consultations in year 1</b> |                  |         |        |       |                                                    |         |        |       |
| Less than 1 (reference)                          | -                | -       | -      | -     | -                                                  | -       | -      | -     |
| 2                                                |                  |         |        |       | 1.53                                               | 0.00    | 1.52   | 1.55  |
| 3-4                                              |                  |         |        |       | 1.87                                               | 0.00    | 1.85   | 1.89  |
| 5-9                                              |                  |         |        |       | 2.17                                               | 0.00    | 2.15   | 2.20  |
| 10 or more                                       |                  |         |        |       | 2.59                                               | 0.00    | 2.57   | 2.62  |

From negative binomial regression models, including practice-level fixed effects (not shown)

**Table A7: Associations of rate of codes in year one following diagnosis for conditions not included in QOF (N=3617348)**

| Variable                                         | Primary analysis |         |        |       | Sensitivity analysis including consultation number |         |        |       |
|--------------------------------------------------|------------------|---------|--------|-------|----------------------------------------------------|---------|--------|-------|
|                                                  | IRR              | P-value | 95% CI |       | IRR                                                | P-value | 95% CI |       |
|                                                  |                  |         | Lower  | Upper |                                                    |         | Lower  | Upper |
| <b>Age category (years)</b>                      |                  |         |        |       |                                                    |         |        |       |
| Under 40                                         | 1.10             | 0.00    | 1.10   | 1.11  | 1.09                                               | 0.00    | 1.08   | 1.10  |
| 40-49                                            | 1.01             | 0.00    | 1.00   | 1.02  | 1.02                                               | 0.00    | 1.01   | 1.03  |
| 50-59                                            | 0.98             | 0.00    | 0.98   | 0.99  | 0.99                                               | 0.09    | 0.99   | 1.00  |
| 60-69 (reference)                                | -                | -       | -      | -     | -                                                  | -       | -      | -     |
| 70-79                                            | 1.05             | 0.00    | 1.05   | 1.06  | 1.03                                               | 0.00    | 1.02   | 1.03  |
| 80 or more                                       | 1.02             | 0.00    | 1.02   | 1.03  | 0.98                                               | 0.00    | 0.97   | 0.99  |
| <b>Sex</b>                                       |                  |         |        |       |                                                    |         |        |       |
| Female (reference)                               | -                | -       | -      | -     | -                                                  | -       | -      | -     |
| Male                                             | 1.00             | 0.03    | 0.99   | 1.00  | 1.13                                               | 0.00    | 1.12   | 1.13  |
| <b>Ethnicity category</b>                        |                  |         |        |       |                                                    |         |        |       |
| White (reference)                                | -                | -       | -      | -     | -                                                  | -       | -      | -     |
| South Asian                                      | 0.95             | 0.00    | 0.94   | 0.96  | 0.89                                               | 0.00    | 0.88   | 0.90  |
| Black                                            | 0.89             | 0.00    | 0.88   | 0.90  | 0.86                                               | 0.00    | 0.85   | 0.87  |
| Other                                            | 0.90             | 0.00    | 0.88   | 0.91  | 0.89                                               | 0.00    | 0.88   | 0.91  |
| Mixed                                            | 0.95             | 0.00    | 0.93   | 0.97  | 0.92                                               | 0.00    | 0.91   | 0.94  |
| Missing                                          | 0.99             | 0.14    | 0.99   | 1.00  | 1.06                                               | 0.00    | 1.05   | 1.06  |
| <b>IMD decile</b>                                |                  |         |        |       |                                                    |         |        |       |
| 1 (most deprived)                                | -                | -       | -      | -     | -                                                  | -       | -      | -     |
| 2                                                | 1.00             | 0.86    | 0.99   | 1.01  | 0.99                                               | 0.06    | 0.98   | 1.00  |
| 3                                                | 1.01             | 0.01    | 1.00   | 1.02  | 1.00                                               | 0.82    | 0.99   | 1.01  |
| 4                                                | 1.02             | 0.00    | 1.01   | 1.03  | 1.00                                               | 0.42    | 0.99   | 1.01  |
| 5                                                | 1.02             | 0.00    | 1.01   | 1.03  | 1.00                                               | 0.86    | 0.99   | 1.01  |
| 6                                                | 1.03             | 0.00    | 1.02   | 1.04  | 0.99                                               | 0.26    | 0.99   | 1.00  |
| 7                                                | 1.03             | 0.00    | 1.02   | 1.04  | 0.99                                               | 0.08    | 0.98   | 1.00  |
| 8                                                | 1.04             | 0.00    | 1.03   | 1.06  | 0.99                                               | 0.15    | 0.98   | 1.00  |
| 9                                                | 1.06             | 0.00    | 1.05   | 1.07  | 0.99                                               | 0.19    | 0.98   | 1.00  |
| 10 (least deprived)                              | 1.06             | 0.00    | 1.05   | 1.07  | 0.98                                               | 0.00    | 0.97   | 0.99  |
| <b>Number of QOF diseases</b>                    |                  |         |        |       |                                                    |         |        |       |
| 0 (reference)                                    | -                | -       | -      | -     | -                                                  | -       | -      | -     |
| 1                                                | 1.16             | 0.00    | 1.15   | 1.16  | 1.02                                               | 0.00    | 1.02   | 1.03  |
| 2                                                | 1.09             | 0.00    | 1.08   | 1.09  | 0.94                                               | 0.00    | 0.93   | 0.94  |
| 3                                                | 1.06             | 0.00    | 1.05   | 1.07  | 0.90                                               | 0.00    | 0.89   | 0.91  |
| 4 or more                                        | 1.04             | 0.00    | 1.03   | 1.04  | 0.85                                               | 0.00    | 0.84   | 0.85  |
| <b>Number of non-QOF diseases</b>                |                  |         |        |       |                                                    |         |        |       |
| 0 (reference)                                    | -                | -       | -      | -     | -                                                  | -       | -      | -     |
| 1                                                | 1.02             | 0.00    | 1.01   | 1.02  | 0.93                                               | 0.00    | 0.92   | 0.94  |
| 2                                                | 1.02             | 0.00    | 1.02   | 1.03  | 0.87                                               | 0.00    | 0.87   | 0.88  |
| 3                                                | 1.04             | 0.00    | 1.03   | 1.05  | 0.83                                               | 0.00    | 0.82   | 0.84  |
| 4 or more                                        | 1.06             | 0.00    | 1.06   | 1.07  | 0.74                                               | 0.00    | 0.74   | 0.75  |
| <b>Calendar year of diagnosis</b>                |                  |         |        |       |                                                    |         |        |       |
| 2015 (reference)                                 | -                | -       | -      | -     | -                                                  | -       | -      | -     |
| 2016                                             | 1.00             | 0.55    | 0.99   | 1.00  | 1.03                                               | 0.00    | 1.02   | 1.03  |
| 2017                                             | 0.99             | 0.00    | 0.99   | 1.00  | 1.05                                               | 0.00    | 1.04   | 1.05  |
| 2018                                             | 0.99             | 0.00    | 0.98   | 0.99  | 1.07                                               | 0.00    | 1.06   | 1.07  |
| 2019                                             | 0.94             | 0.00    | 0.94   | 0.95  | 1.06                                               | 0.00    | 1.06   | 1.07  |
| <b>Average number of consultations in year 1</b> |                  |         |        |       |                                                    |         |        |       |
| Less than 1 (reference)                          | -                | -       | -      | -     | -                                                  | -       | -      | -     |
| 1-2                                              |                  |         |        |       | 2.38                                               | 0.00    | 2.36   | 2.40  |
| 3-4                                              |                  |         |        |       | 3.49                                               | 0.00    | 3.45   | 3.52  |
| 5-9                                              |                  |         |        |       | 4.67                                               | 0.00    | 4.62   | 4.71  |
| 10 or more                                       |                  |         |        |       | 6.37                                               | 0.00    | 6.31   | 6.44  |

From negative binomial regression models, including practice-level fixed effects (not shown)

Table A8: Associations of rate of codes in year two following diagnosis for conditions not included in QOF (N=3593019)

| Variable                                         | Primary analysis |         |        |       | Sensitivity analysis including consultation number |         |        |       |
|--------------------------------------------------|------------------|---------|--------|-------|----------------------------------------------------|---------|--------|-------|
|                                                  | IRR              | P-value | 95% CI |       | IRR                                                | P-value | 95% CI |       |
|                                                  |                  |         | Lower  | Upper |                                                    |         | Lower  | Upper |
| <b>Age category (years)</b>                      |                  |         |        |       |                                                    |         |        |       |
| Under 40                                         | 1.27             | 0.00    | 1.26   | 1.28  | 1.26                                               | 0.00    | 1.25   | 1.28  |
| 40-49                                            | 1.03             | 0.00    | 1.02   | 1.04  | 1.03                                               | 0.00    | 1.02   | 1.04  |
| 50-59                                            | 0.98             | 0.00    | 0.97   | 0.99  | 0.99                                               | 0.10    | 0.98   | 1.00  |
| 60-69 (reference)                                | -                | -       | -      | -     | -                                                  | -       | -      | -     |
| 70-79                                            | 1.06             | 0.00    | 1.05   | 1.07  | 1.03                                               | 0.00    | 1.02   | 1.04  |
| 80 or more                                       | 1.06             | 0.00    | 1.05   | 1.08  | 1.01                                               | 0.18    | 1.00   | 1.02  |
| <b>Sex</b>                                       |                  |         |        |       |                                                    |         |        |       |
| Female (reference)                               | -                | -       | -      | -     | -                                                  | -       | -      | -     |
| Male                                             | 0.93             | 0.00    | 0.93   | 0.94  | 1.08                                               | 0.00    | 1.07   | 1.09  |
| <b>Ethnicity category</b>                        |                  |         |        |       |                                                    |         |        |       |
| White (reference)                                | -                | -       | -      | -     | -                                                  | -       | -      | -     |
| South Asian                                      | 0.99             | 0.17    | 0.97   | 1.00  | 0.92                                               | 0.00    | 0.91   | 0.94  |
| Black                                            | 0.94             | 0.00    | 0.92   | 0.95  | 0.91                                               | 0.00    | 0.89   | 0.92  |
| Other                                            | 0.88             | 0.00    | 0.86   | 0.91  | 0.89                                               | 0.00    | 0.86   | 0.92  |
| Mixed                                            | 0.94             | 0.00    | 0.91   | 0.98  | 0.92                                               | 0.00    | 0.89   | 0.95  |
| Missing                                          | 0.96             | 0.00    | 0.95   | 0.97  | 1.05                                               | 0.00    | 1.03   | 1.06  |
| <b>IMD decile</b>                                |                  |         |        |       |                                                    |         |        |       |
| 1 (most deprived)                                | -                | -       | -      | -     | -                                                  | -       | -      | -     |
| 2                                                | 1.01             | 0.10    | 1.00   | 1.03  | 1.00                                               | 0.79    | 0.99   | 1.02  |
| 3                                                | 1.03             | 0.00    | 1.02   | 1.05  | 1.02                                               | 0.00    | 1.01   | 1.04  |
| 4                                                | 1.04             | 0.00    | 1.02   | 1.05  | 1.02                                               | 0.01    | 1.01   | 1.04  |
| 5                                                | 1.05             | 0.00    | 1.04   | 1.07  | 1.03                                               | 0.00    | 1.01   | 1.04  |
| 6                                                | 1.06             | 0.00    | 1.04   | 1.08  | 1.03                                               | 0.00    | 1.01   | 1.04  |
| 7                                                | 1.07             | 0.00    | 1.06   | 1.09  | 1.03                                               | 0.00    | 1.01   | 1.05  |
| 8                                                | 1.10             | 0.00    | 1.08   | 1.11  | 1.04                                               | 0.00    | 1.03   | 1.06  |
| 9                                                | 1.13             | 0.00    | 1.11   | 1.14  | 1.06                                               | 0.00    | 1.04   | 1.08  |
| 10 (least deprived)                              | 1.14             | 0.00    | 1.12   | 1.16  | 1.06                                               | 0.00    | 1.04   | 1.08  |
| <b>Number of QOF diseases</b>                    |                  |         |        |       |                                                    |         |        |       |
| 0 (reference)                                    | -                | -       | -      | -     | -                                                  | -       | -      | -     |
| 1                                                | 1.19             | 0.00    | 1.18   | 1.21  | 1.05                                               | 0.00    | 1.04   | 1.06  |
| 2                                                | 1.15             | 0.00    | 1.14   | 1.16  | 0.98                                               | 0.00    | 0.97   | 0.99  |
| 3                                                | 1.13             | 0.00    | 1.12   | 1.15  | 0.95                                               | 0.00    | 0.94   | 0.96  |
| 4 or more                                        | 1.16             | 0.00    | 1.14   | 1.17  | 0.93                                               | 0.00    | 0.92   | 0.94  |
| <b>Number of non-QOF diseases</b>                |                  |         |        |       |                                                    |         |        |       |
| 0 (reference)                                    | -                | -       | -      | -     | -                                                  | -       | -      | -     |
| 1                                                | 1.04             | 0.00    | 1.03   | 1.06  | 0.94                                               | 0.00    | 0.93   | 0.95  |
| 2                                                | 1.09             | 0.00    | 1.08   | 1.11  | 0.90                                               | 0.00    | 0.89   | 0.91  |
| 3                                                | 1.13             | 0.00    | 1.11   | 1.14  | 0.86                                               | 0.00    | 0.85   | 0.87  |
| 4 or more                                        | 1.21             | 0.00    | 1.20   | 1.23  | 0.80                                               | 0.00    | 0.79   | 0.81  |
| <b>Calendar year of diagnosis</b>                |                  |         |        |       |                                                    |         |        |       |
| 2015 (reference)                                 | -                | -       | -      | -     | -                                                  | -       | -      | -     |
| 2016                                             | 1.00             | 0.56    | 0.99   | 1.01  | 1.03                                               | 0.00    | 1.02   | 1.04  |
| 2017                                             | 1.00             | 0.43    | 0.99   | 1.01  | 1.06                                               | 0.00    | 1.05   | 1.07  |
| 2018                                             | 0.91             | 0.00    | 0.90   | 0.92  | 1.01                                               | 0.01    | 1.00   | 1.02  |
| 2019                                             | 0.79             | 0.00    | 0.79   | 0.80  | 0.93                                               | 0.00    | 0.92   | 0.94  |
| <b>Average number of consultations in year 1</b> |                  |         |        |       |                                                    |         |        |       |
| Less than 1 (reference)                          | -                | -       | -      | -     | -                                                  | -       | -      | -     |
| 1-2                                              |                  |         |        |       | 2.76                                               | 0.00    | 2.72   | 2.81  |
| 3-4                                              |                  |         |        |       | 4.06                                               | 0.00    | 4.00   | 4.12  |
| 5-9                                              |                  |         |        |       | 5.40                                               | 0.00    | 5.32   | 5.48  |
| 10 or more                                       |                  |         |        |       | 7.35                                               | 0.00    | 7.24   | 7.47  |

From negative binomial regression models, including practice-level fixed effects (not shown)

## References

1. Head, A. *et al.* Inequalities in incident and prevalent multimorbidity in England, 2004–2013: a population-based, descriptive study. *The Lancet Healthy Longevity* **2**, e489–e497 (2021).
2. Kuan, V. *et al.* A chronological map of 308 physical and mental health conditions from 4 million individuals in the English National Health Service. *The Lancet Digital Health* **1**, e63–e77 (2019).
3. Bisquera, A. *et al.* Inequalities in developing multimorbidity over time: A population-based cohort study from an urban, multi-ethnic borough in the United Kingdom. *Lancet Reg Health Eur* **12**, 100247 (2021).
4. Ashworth, M. *et al.* Journey to multimorbidity: longitudinal analysis exploring cardiovascular risk factors and sociodemographic determinants in an urban setting. *BMJ Open* **9**, (2019).
5. NHS Health and Social Care Information Centre. National Quality and Outcomes Framework Statistics for England 2004/05. <https://files.digital.nhs.uk/publicationimport/pub01xxx/pub01946/qof-eng-04-05-rep.pdf>.
6. Health & Social Care Information Centre. Quality and Outcomes Framework – Prevalence, Achievements and Exceptions Report. England, 2013-14. <https://files.digital.nhs.uk/publicationimport/pub15xxx/pub15751/qof-1314-report-v1.1.pdf>.
7. Health & Social Care Information Centre. Quality and Outcomes Framework – Prevalence, Achievements and Exceptions Report, England, 2014-15. <https://files.digital.nhs.uk/publicationimport/pub18xxx/pub18887/qof-1415-report%20v1.1.pdf> (2015).

**The RECORD statement – checklist of items, extended from the STROBE statement, that should be reported in observational studies using routinely collected health data.**

|                           | Item No. | STROBE items                                                                                                                                                                               | Location in manuscript where items are reported | RECORD items                                                                                                                                                                                                                                                                                                                                                                                                                                | Location in manuscript where items are reported |
|---------------------------|----------|--------------------------------------------------------------------------------------------------------------------------------------------------------------------------------------------|-------------------------------------------------|---------------------------------------------------------------------------------------------------------------------------------------------------------------------------------------------------------------------------------------------------------------------------------------------------------------------------------------------------------------------------------------------------------------------------------------------|-------------------------------------------------|
| <b>Title and abstract</b> |          |                                                                                                                                                                                            |                                                 |                                                                                                                                                                                                                                                                                                                                                                                                                                             |                                                 |
|                           | 1        | (a) Indicate the study's design with a commonly used term in the title or the abstract (b) Provide in the abstract an informative and balanced summary of what was done and what was found | p1-3                                            | RECORD 1.1: The type of data used should be specified in the title or abstract. When possible, the name of the databases used should be included.<br><br>RECORD 1.2: If applicable, the geographic region and timeframe within which the study took place should be reported in the title or abstract.<br><br>RECORD 1.3: If linkage between databases was conducted for the study, this should be clearly stated in the title or abstract. | p1<br><br>p2<br><br>N/A                         |
| <b>Introduction</b>       |          |                                                                                                                                                                                            |                                                 |                                                                                                                                                                                                                                                                                                                                                                                                                                             |                                                 |
| Background rationale      | 2        | Explain the scientific background and rationale for the investigation being reported                                                                                                       | p4-5                                            |                                                                                                                                                                                                                                                                                                                                                                                                                                             |                                                 |
| Objectives                | 3        | State specific objectives, including any prespecified hypotheses                                                                                                                           | p5                                              |                                                                                                                                                                                                                                                                                                                                                                                                                                             |                                                 |
| <b>Methods</b>            |          |                                                                                                                                                                                            |                                                 |                                                                                                                                                                                                                                                                                                                                                                                                                                             |                                                 |
| Study Design              | 4        | Present key elements of study design early in the paper                                                                                                                                    | p5                                              |                                                                                                                                                                                                                                                                                                                                                                                                                                             |                                                 |
| Setting                   | 5        | Describe the setting, locations, and relevant dates, including periods of recruitment, exposure, follow-up, and data collection                                                            | p5                                              |                                                                                                                                                                                                                                                                                                                                                                                                                                             |                                                 |



|                              |   |                                                                                                                                                                                                                                                                                                                                                                                                                                                                                                                                                                                                                                                                                                                              |                      |                                                                                                                                                                                                                                                                                                                                                                                                                                                                                                                                                                                                                                                                                                      |    |
|------------------------------|---|------------------------------------------------------------------------------------------------------------------------------------------------------------------------------------------------------------------------------------------------------------------------------------------------------------------------------------------------------------------------------------------------------------------------------------------------------------------------------------------------------------------------------------------------------------------------------------------------------------------------------------------------------------------------------------------------------------------------------|----------------------|------------------------------------------------------------------------------------------------------------------------------------------------------------------------------------------------------------------------------------------------------------------------------------------------------------------------------------------------------------------------------------------------------------------------------------------------------------------------------------------------------------------------------------------------------------------------------------------------------------------------------------------------------------------------------------------------------|----|
| Participants                 | 6 | <p>(a) <i>Cohort study</i> - Give the eligibility criteria, and the sources and methods of selection of participants. Describe methods of follow-up</p> <p><i>Case-control study</i> - Give the eligibility criteria, and the sources and methods of case ascertainment and control selection. Give the rationale for the choice of cases and controls</p> <p><i>Cross-sectional study</i> - Give the eligibility criteria, and the sources and methods of selection of participants</p> <p>(b) <i>Cohort study</i> - For matched studies, give matching criteria and number of exposed and unexposed</p> <p><i>Case-control study</i> - For matched studies, give matching criteria and the number of controls per case</p> | p5 and appendix p2   | <p>RECORD 6.1: The methods of study population selection (such as codes or algorithms used to identify subjects) should be listed in detail. If this is not possible, an explanation should be provided.</p> <p>RECORD 6.2: Any validation studies of the codes or algorithms used to select the population should be referenced. If validation was conducted for this study and not published elsewhere, detailed methods and results should be provided.</p> <p>RECORD 6.3: If the study involved linkage of databases, consider use of a flow diagram or other graphical display to demonstrate the data linkage process, including the number of individuals with linked data at each stage.</p> | p5 |
| Variables                    | 7 | Clearly define all outcomes, exposures, predictors, potential confounders, and effect modifiers. Give diagnostic criteria, if applicable.                                                                                                                                                                                                                                                                                                                                                                                                                                                                                                                                                                                    | p5 and appendix p2-3 | RECORD 7.1: A complete list of codes and algorithms used to classify exposures, outcomes, confounders, and effect modifiers should be provided. If these cannot be reported, an explanation should be provided.                                                                                                                                                                                                                                                                                                                                                                                                                                                                                      |    |
| Data sources/<br>measurement | 8 | For each variable of interest, give sources of data and details of methods of assessment (measurement). Describe comparability of assessment methods if there is more than one group                                                                                                                                                                                                                                                                                                                                                                                                                                                                                                                                         | p5 and appendix p2-3 |                                                                                                                                                                                                                                                                                                                                                                                                                                                                                                                                                                                                                                                                                                      |    |

|                                                                                                                                                    |                                  |    |                                                                                                                                                                                                                                                                                                                                                                                                                                                                                                                                                                      |      |                                                                                                                                                             |
|----------------------------------------------------------------------------------------------------------------------------------------------------|----------------------------------|----|----------------------------------------------------------------------------------------------------------------------------------------------------------------------------------------------------------------------------------------------------------------------------------------------------------------------------------------------------------------------------------------------------------------------------------------------------------------------------------------------------------------------------------------------------------------------|------|-------------------------------------------------------------------------------------------------------------------------------------------------------------|
| 1<br>2<br>3<br>4                                                                                                                                   | Bias                             | 9  | Describe any efforts to address potential sources of bias                                                                                                                                                                                                                                                                                                                                                                                                                                                                                                            | p6-7 |                                                                                                                                                             |
| 5<br>6<br>7<br>8<br>9                                                                                                                              | Study size                       | 10 | Explain how the study size was arrived at                                                                                                                                                                                                                                                                                                                                                                                                                                                                                                                            | p8   |                                                                                                                                                             |
| 10<br>11<br>12<br>13<br>14<br>15<br>16<br>17<br>18<br>19<br>20<br>21<br>22<br>23<br>24<br>25<br>26<br>27<br>28<br>29<br>30<br>31<br>32<br>33<br>34 | Quantitative variables           | 11 | Explain how quantitative variables were handled in the analyses. If applicable, describe which groupings were chosen, and why                                                                                                                                                                                                                                                                                                                                                                                                                                        | P5-6 |                                                                                                                                                             |
| 35<br>36<br>37<br>38<br>39<br>40<br>41<br>42<br>43<br>44<br>45<br>46<br>47                                                                         | Statistical methods              | 12 | (a) Describe all statistical methods, including those used to control for confounding<br>(b) Describe any methods used to examine subgroups and interactions<br>(c) Explain how missing data were addressed<br>(d) <i>Cohort study</i> - If applicable, explain how loss to follow-up was addressed<br><i>Case-control study</i> - If applicable, explain how matching of cases and controls was addressed<br><i>Cross-sectional study</i> - If applicable, describe analytical methods taking account of sampling strategy<br>(e) Describe any sensitivity analyses | p6-7 |                                                                                                                                                             |
|                                                                                                                                                    | Data access and cleaning methods |    | ..                                                                                                                                                                                                                                                                                                                                                                                                                                                                                                                                                                   |      | RECORD 12.1: Authors should describe the extent to which the investigators had access to the database population used to create the study population.<br>p5 |

|                  |    |                                                                                                                                                                                                                                                                                                                                                 |             |                                                                                                                                                                                                                                                                                                                    |     |
|------------------|----|-------------------------------------------------------------------------------------------------------------------------------------------------------------------------------------------------------------------------------------------------------------------------------------------------------------------------------------------------|-------------|--------------------------------------------------------------------------------------------------------------------------------------------------------------------------------------------------------------------------------------------------------------------------------------------------------------------|-----|
|                  |    |                                                                                                                                                                                                                                                                                                                                                 |             | RECORD 12.2: Authors should provide information on the data cleaning methods used in the study.                                                                                                                                                                                                                    |     |
| Linkage          |    | ..                                                                                                                                                                                                                                                                                                                                              |             | RECORD 12.3: State whether the study included person-level, institutional-level, or other data linkage across two or more databases. The methods of linkage and methods of linkage quality evaluation should be provided.                                                                                          | N/A |
| <b>Results</b>   |    |                                                                                                                                                                                                                                                                                                                                                 |             |                                                                                                                                                                                                                                                                                                                    |     |
| Participants     | 13 | (a) Report the numbers of individuals at each stage of the study ( <i>e.g.</i> , numbers potentially eligible, examined for eligibility, confirmed eligible, included in the study, completing follow-up, and analysed)<br>(b) Give reasons for non-participation at each stage.<br>(c) Consider use of a flow diagram                          | p8          | RECORD 13.1: Describe in detail the selection of the persons included in the study ( <i>i.e.</i> , study population selection) including filtering based on data quality, data availability and linkage. The selection of included persons can be described in the text and/or by means of the study flow diagram. | p8  |
| Descriptive data | 14 | (a) Give characteristics of study participants ( <i>e.g.</i> , demographic, clinical, social) and information on exposures and potential confounders<br>(b) Indicate the number of participants with missing data for each variable of interest<br>(c) <i>Cohort study</i> - summarise follow-up time ( <i>e.g.</i> , average and total amount) | p8, Table 1 |                                                                                                                                                                                                                                                                                                                    |     |
| Outcome data     | 15 | <i>Cohort study</i> - Report numbers of outcome events or summary measures over time<br><i>Case-control study</i> - Report numbers in each exposure                                                                                                                                                                                             | p9-10       |                                                                                                                                                                                                                                                                                                                    |     |

|                   |    |                                                                                                                                                                                                                                                                                                                                                                                                                 |                    |                                                                                                                                                                                                                                                                                                          |     |
|-------------------|----|-----------------------------------------------------------------------------------------------------------------------------------------------------------------------------------------------------------------------------------------------------------------------------------------------------------------------------------------------------------------------------------------------------------------|--------------------|----------------------------------------------------------------------------------------------------------------------------------------------------------------------------------------------------------------------------------------------------------------------------------------------------------|-----|
|                   |    | category, or summary measures of exposure<br><i>Cross-sectional study</i> - Report numbers of outcome events or summary measures                                                                                                                                                                                                                                                                                |                    |                                                                                                                                                                                                                                                                                                          |     |
| Main results      | 16 | (a) Give unadjusted estimates and, if applicable, confounder-adjusted estimates and their precision (e.g., 95% confidence interval). Make clear which confounders were adjusted for and why they were included<br>(b) Report category boundaries when continuous variables were categorized<br>(c) If relevant, consider translating estimates of relative risk into absolute risk for a meaningful time period | p9-14, Figures 1-3 |                                                                                                                                                                                                                                                                                                          |     |
| Other analyses    | 17 | Report other analyses done— e.g., analyses of subgroups and interactions, and sensitivity analyses                                                                                                                                                                                                                                                                                                              | p11                |                                                                                                                                                                                                                                                                                                          |     |
| <b>Discussion</b> |    |                                                                                                                                                                                                                                                                                                                                                                                                                 |                    |                                                                                                                                                                                                                                                                                                          |     |
| Key results       | 18 | Summarise key results with reference to study objectives                                                                                                                                                                                                                                                                                                                                                        | p15                |                                                                                                                                                                                                                                                                                                          |     |
| Limitations       | 19 | Discuss limitations of the study, taking into account sources of potential bias or imprecision. Discuss both direction and magnitude of any potential bias                                                                                                                                                                                                                                                      | p17                | RECORD 19.1: Discuss the implications of using data that were not created or collected to answer the specific research question(s). Include discussion of misclassification bias, unmeasured confounding, missing data, and changing eligibility over time, as they pertain to the study being reported. | p17 |
| Interpretation    | 20 | Give a cautious overall interpretation of results considering objectives,                                                                                                                                                                                                                                                                                                                                       | p15, p17-18        |                                                                                                                                                                                                                                                                                                          |     |

|                                                           |    |                                                                                                                                                               |     |                                                                                                                                                          |     |
|-----------------------------------------------------------|----|---------------------------------------------------------------------------------------------------------------------------------------------------------------|-----|----------------------------------------------------------------------------------------------------------------------------------------------------------|-----|
|                                                           |    | limitations, multiplicity of analyses, results from similar studies, and other relevant evidence                                                              |     |                                                                                                                                                          |     |
| Generalisability                                          | 21 | Discuss the generalisability (external validity) of the study results                                                                                         | p17 |                                                                                                                                                          |     |
| <b>Other Information</b>                                  |    |                                                                                                                                                               |     |                                                                                                                                                          |     |
| Funding                                                   | 22 | Give the source of funding and the role of the funders for the present study and, if applicable, for the original study on which the present article is based | p18 |                                                                                                                                                          |     |
| Accessibility of protocol, raw data, and programming code |    | ..                                                                                                                                                            |     | RECORD 22.1: Authors should provide information on how to access any supplemental information such as the study protocol, raw data, or programming code. | p18 |

\*Reference: Benchimol EI, Smeeth L, Guttman A, Harron K, Moher D, Petersen I, Sørensen HT, von Elm E, Langan SM, the RECORD Working Committee. The REporting of studies Conducted using Observational Routinely-collected health Data (RECORD) Statement. *PLoS Medicine* 2015; in press.

\*Checklist is protected under Creative Commons Attribution ([CC BY](https://creativecommons.org/licenses/by/4.0/)) license.
