# Supplementary material for: Identifying potential biases in code sequences in primary care electronic healthcare records: a retrospective cohort study of the determinants of code frequency
Source: PubMed Central journal article supplement (PMC10537851; doi:10.1136/bmjopen-2023-072884), 2023-09-27
Supplement: bmjopen-2023-072884supp001.pdf [file bmjopen-2023-072884supp001.pdf]

## Appendix

### **Identifying potential biases in code sequences in primary care electronic healthcare records: a retrospective cohort study of the determinants of code frequency**

Beaney T<sup>1,2</sup> (0000-0001-9709-7264), Clarke J<sup>2</sup>, Salman D<sup>1,3</sup>, Woodcock T<sup>1</sup>, Majeed A<sup>1</sup>, Barahona M<sup>2</sup>, Aylin P<sup>1</sup>

1. Department of Primary Care and Public Health, Imperial College London, London, W6 8RP, United Kingdom
2. Centre for Mathematics of Precision Healthcare, Department of Mathematics, Imperial College London, London, SW7 2AZ, United Kingdom
3. MSk Lab, Department of Surgery and Cancer, Faculty of Medicine, Imperial College London, London, UK

Corresponding Author:

Dr Thomas Beaney

Department of Primary Care and Public Health, Imperial College London, London, W6 8RP, United Kingdom

Email: [thomas.beaney@imperial.ac.uk](mailto:thomas.beaney@imperial.ac.uk)

Patients were included with continuous registration dates between 1<sup>st</sup> January 2014 and 31<sup>st</sup> December 2020. The 1<sup>st</sup> January 2014 was chosen to allow for a full one year of registration at a GP practice prior to follow-up, to reduce the potential impact of bias from newly registered patients having pre-existing conditions coded for the first time at their new practice. The end date of 31<sup>st</sup> December 2020 was chosen to provide at least one full year of follow-up for conditions newly diagnosed in 2019. Patients were followed up until the earliest date of death, deregistration and latest date of data extraction from their practice, if after 31<sup>st</sup> December 2020. The earliest possible censoring date for a patient was 1<sup>st</sup> January 2021 and the last date of follow-up for a patient was 21<sup>st</sup> March 2022.

### Chronic conditions

Diseases were mapped using code lists developed for the CALIBER study, and adapted for use in multimorbidity in CPRD Aurum.<sup>1,2</sup> We reviewed the codes in these lists, and made amendments to the code lists for diabetes. The ‘other/unspecified’ diabetes code list contained codes specific to both Type 1 and Type 2 diabetes, and we removed these to ensure the list included only codes where a more specific Type 1 or Type 2 diagnosis was not stated. We added chronic primary pain to the set of included conditions and created a new code list. Previous studies of multimorbidity in primary care settings have found a high prevalence and burden of chronic pain.<sup>3,4</sup> However, in order to avoid double counting of pain related to another chronic condition included, we excluded secondary causes, and included only primary pain conditions.

### Assignment to QOF

Diseases were classified as included or not included in QOF by two clinicians with experience working as GPs: TB and DS. The first QOF year in 2004/2005 included eleven diseases, with new conditions added in subsequent years.<sup>5</sup> Rheumatoid arthritis was added to QOF in 2013/2014, but there were no subsequent additions of any of the diseases included in this study.<sup>6</sup> However, hypothyroidism was included in QOF from its start until 2014/15 when it was removed.<sup>7</sup> The thyroid disease category from CALIBER included codes for both hypothyroidism and hyperthyroidism. We therefore excluded the thyroid disease category from comparisons of QOF to avoid any carry-over effect from prior inclusion in QOF, and dilution from non-hypothyroid conditions. The following QOF conditions from 2014/15 to 2019/20 were included:

1. Coronary Heart Disease
2. Left Ventricular Dysfunction / Heart Failure (from 2006)
3. Stroke (and TIA from 2006)
4. Hypertension
5. Diabetes
6. COPD
7. Epilepsy
8. Cancer
9. Mental Health
10. Asthma
11. Dementia
12. Depression
13. CKD
14. Atrial fibrillation
15. Obesity
16. Learning disabilities
17. Palliative care
18. Smoking
19. Cardio-vascular disease (primary prevention)
20. Peripheral Arterial Disease (PAD)
21. Osteoporosis
22. Rheumatoid arthritis

For analyses of counts per calendar year, the total counts of disease codes were calculated for the first and second year from diagnosis. Counts were stratified according to whether a condition was included in QOF. A patient was included for a given calendar year if they had at least one QOF or non-QOF condition diagnosed in that year, as shown in Table A1.

**Table A1: example of the stratification of condition and calendar year for each newly diagnosed condition for three hypothetical patients**

| Patient | Age | Condition | Calendar year | Count in year one | Count in year two |
|---------|-----|-----------|---------------|-------------------|-------------------|
| 1       | 67  | QOF       | 2015          | 0                 | 0                 |
| 1       | 68  | QOF       | 2016          | 2                 | 0                 |
| 1       | 70  | QOF       | 2018          | 4                 | 2                 |
| 1       | 67  | Non-QOF   | 2015          | 1                 | 1                 |
| 2       | 28  | Non-QOF   | 2019          | 1                 | 2                 |
| 3       | 52  | QOF       | 2017          | 5                 | 4                 |
| 3       | 52  | Non-QOF   | 2017          | 2                 | 2                 |

### Statistical analyses

Mixed effects negative binomial models were constructed. We considered use of a zero-inflated model, but coefficients from the logit and negative binomial components of the model were similar, and so in the interests of interpretable findings, the more parsimonious negative binomial model was selected.

Equation for the mixed effects negative binomial regression model, including fixed effects for calendar year and GP practice and random effects for patient:

$$\log(y_{i,j}) = \beta_0 + \beta_1 age_{i,j} + \beta_2 gender_{i,j} + \beta_3 ethnicity_{i,j} + \beta_4 IMD_{i,j} \\ + \beta_5 year_{i,j} + \beta_6 GP_{i,j} + u_j$$

where  $i$  represents QOF or non-QOF conditions newly diagnosed in patient  $j$  and  $y_{i,j}$  is the count of codes in the given year.

**A2: Frequency and percentage of pre-existing diseases (as of 1<sup>st</sup> January 2015) for all 3,113,724 eligible patients**

| <b>Pre-existing disease</b>                      | <b>Frequency</b> | <b>Percentage</b> |
|--------------------------------------------------|------------------|-------------------|
| Hypertension                                     | 751009           | 24.12%            |
| Enthesopathy and synovial disorder               | 736087           | 23.64%            |
| Dermatitis                                       | 710945           | 22.83%            |
| Depression                                       | 568871           | 18.27%            |
| Anxiety disorders                                | 507406           | 16.30%            |
| Allergic and chronic rhinitis                    | 477053           | 15.32%            |
| Asthma                                           | 456335           | 14.66%            |
| Osteoarthritis (excl spine)                      | 444668           | 14.28%            |
| Gastro-oesophageal reflux disease                | 301839           | 9.69%             |
| Obesity                                          | 294916           | 9.47%             |
| Diabetes Mellitus: other or not specified        | 285681           | 9.17%             |
| Hearing loss                                     | 279470           | 8.98%             |
| Migraine                                         | 270415           | 8.68%             |
| Type 2 Diabetes Mellitus                         | 255578           | 8.21%             |
| Irritable bowel syndrome                         | 246744           | 7.92%             |
| Abdominal Hernia                                 | 237968           | 7.64%             |
| Acne                                             | 225183           | 7.23%             |
| Chronic sinusitis                                | 212496           | 6.82%             |
| Thyroid Disease                                  | 204639           | 6.57%             |
| Spondylosis                                      | 181722           | 5.84%             |
| Gastritis and duodenitis                         | 181668           | 5.83%             |
| Cataract                                         | 160486           | 5.15%             |
| Chronic Kidney Disease                           | 158134           | 5.08%             |
| Coronary Heart Disease (not otherwise specified) | 144806           | 4.65%             |
| Seborrheic dermatitis                            | 143168           | 4.60%             |
| Urinary Incontinence                             | 137919           | 4.43%             |
| Alcohol Misuse                                   | 132717           | 4.26%             |
| Psoriasis                                        | 132694           | 4.26%             |
| Diaphragmatic hernia                             | 131539           | 4.22%             |
| Diverticular Disease                             | 131332           | 4.22%             |
| Tinnitus                                         | 123308           | 3.96%             |
| Gout                                             | 120568           | 3.87%             |
| Stable Angina                                    | 120309           | 3.86%             |
| Intervertebral disc disorders                    | 117787           | 3.78%             |
| Anaemia: other                                   | 116859           | 3.75%             |
| Diabetic Eye Disease                             | 102901           | 3.30%             |
| Rosacea                                          | 96511            | 3.10%             |
| Dysmenorrhoea                                    | 94881            | 3.05%             |

|                                         |       |       |
|-----------------------------------------|-------|-------|
| Benign Prostatic Hyperplasia            | 92304 | 2.96% |
| Osteoporosis                            | 91850 | 2.95% |
| Primary Malignancy: Skin                | 89500 | 2.87% |
| COPD                                    | 84482 | 2.71% |
| Atrial Fibrillation                     | 80645 | 2.59% |
| Peripheral Neuropathy                   | 77117 | 2.48% |
| Chronic Fatigue Syndrome                | 67489 | 2.17% |
| Myocardial Infarction                   | 67215 | 2.16% |
| Vitamin B12 deficiency anaemia          | 64015 | 2.06% |
| Glaucoma                                | 58081 | 1.87% |
| Epilepsy                                | 53058 | 1.70% |
| Stroke: not otherwise specified         | 50614 | 1.63% |
| Substance Misuse                        | 50251 | 1.61% |
| Primary Malignancy: Breast              | 49737 | 1.60% |
| Venous thromboembolic disease (Excl PE) | 47013 | 1.51% |
| Transient ischaemic attack              | 44616 | 1.43% |
| Fibromatosis                            | 42701 | 1.37% |
| Neuropathic Bladder                     | 42008 | 1.35% |
| Raynaud's syndrome                      | 38879 | 1.25% |
| Endometriosis                           | 37868 | 1.22% |
| Sleep apnoea                            | 35743 | 1.15% |
| Heart failure                           | 35364 | 1.14% |
| Peripheral Vascular Disease             | 32852 | 1.06% |
| Rheumatoid Arthritis                    | 32070 | 1.03% |
| Macular degeneration                    | 30761 | 0.99% |
| Chronic primary pain                    | 29506 | 0.95% |
| Anterior and Intermediate Uveitis       | 28838 | 0.93% |
| Visual impairment and blindness         | 28372 | 0.91% |
| Polymyalgia Rheumatica                  | 27447 | 0.88% |
| Primary Malignancy: Prostate            | 26288 | 0.84% |
| Ulcerative colitis                      | 22236 | 0.71% |
| Nonrheumatic mitral valve disorders     | 20980 | 0.67% |
| Spinal stenosis                         | 20820 | 0.67% |
| Nonrheumatic aortic valve disorders     | 20695 | 0.66% |
| Schizophrenia                           | 20394 | 0.65% |
| Type 1 Diabetes Mellitus                | 19978 | 0.64% |
| Unstable Angina                         | 18925 | 0.61% |
| Trigeminal neuralgia                    | 18854 | 0.61% |
| Scleritis and episcleritis              | 18830 | 0.60% |
| Fatty Liver                             | 18774 | 0.60% |
| Barrett's oesophagus                    | 18152 | 0.58% |
| Supraventricular tachycardia            | 18128 | 0.58% |
| Intellectual disability                 | 18073 | 0.58% |
| Pancreatitis                            | 18043 | 0.58% |

|                                        |       |       |
|----------------------------------------|-------|-------|
| Bronchiectasis                         | 18006 | 0.58% |
| Primary Malignancy: Melanoma           | 17594 | 0.57% |
| Personality disorders                  | 17448 | 0.56% |
| Alopecia areata                        | 17111 | 0.55% |
| Primary Malignancy: Bowel              | 16746 | 0.54% |
| Obsessive-compulsive disorder          | 15553 | 0.50% |
| Polycystic ovarian syndrome            | 14606 | 0.47% |
| Crohn's disease                        | 14445 | 0.46% |
| Folate deficiency anaemia              | 13853 | 0.44% |
| Retinal vascular occlusions            | 13829 | 0.44% |
| Obstructive and reflux uropathy        | 13725 | 0.44% |
| Ischaemic stroke                       | 13451 | 0.43% |
| Hidradenitis suppurativa               | 13305 | 0.43% |
| Vitiligo                               | 13218 | 0.42% |
| Meniere's Disease                      | 13192 | 0.42% |
| Bipolar affective disorder and mania   | 12856 | 0.41% |
| Coeliac disease                        | 12625 | 0.41% |
| Diabetic Neuropathy                    | 12517 | 0.40% |
| Chronic viral hepatitis                | 11885 | 0.38% |
| Thrombophilia                          | 11527 | 0.37% |
| Psoriatic Arthritis                    | 11201 | 0.36% |
| Eating Disorders                       | 11171 | 0.36% |
| Dementia                               | 10297 | 0.33% |
| Spondylolisthesis                      | 10229 | 0.33% |
| Secondary Thrombocytopenia             | 9800  | 0.31% |
| Congenital Septal Defect               | 9203  | 0.30% |
| Sarcoidosis                            | 9090  | 0.29% |
| Multiple sclerosis                     | 9070  | 0.29% |
| Benign essential tremor                | 9008  | 0.29% |
| Right bundle branch block combinations | 8160  | 0.26% |
| Primary Malignancy: Bladder            | 8066  | 0.26% |
| Primary Malignancy: other              | 8021  | 0.26% |
| Glomerulonephritis                     | 7950  | 0.26% |
| Autism and Asperger's syndrome         | 7920  | 0.25% |
| Non-Hodgkin Lymphoma                   | 7579  | 0.24% |
| Hyperparathyroidism                    | 7437  | 0.24% |
| Pleural effusion                       | 7368  | 0.24% |
| Hyperkinetic disorders                 | 7056  | 0.23% |
| Ankylosing spondylitis                 | 7044  | 0.23% |
| Lupus Erythematosus                    | 6976  | 0.22% |
| Cirrhosis                              | 6768  | 0.22% |
| Alcoholic liver disease                | 6621  | 0.21% |
| Left bundle branch block               | 6512  | 0.21% |
| Subarachnoid haemorrhage               | 6158  | 0.20% |



|                                         |      |       |
|-----------------------------------------|------|-------|
| Collapsed vertebra                      | 6082 | 0.20% |
| Autonomic Neuropathy                    | 5496 | 0.18% |
| Cardiomyopathy: other                   | 5465 | 0.18% |
| Parkinson's disease                     | 5333 | 0.17% |
| Leukaemia                               | 5243 | 0.17% |
| Giant Cell arteritis                    | 5225 | 0.17% |
| Hyposplenism                            | 4737 | 0.15% |
| HIV                                     | 4697 | 0.15% |
| Endometrial hyperplasia and hypertrophy | 4655 | 0.15% |
| Primary Malignancy: Uterus              | 4589 | 0.15% |
| Sjogren's Syndrome                      | 4559 | 0.15% |
| Spina bifida                            | 4427 | 0.14% |
| Cerebral Palsy                          | 4011 | 0.13% |
| Primary Thrombocytopenia                | 3979 | 0.13% |
| Pleural plaque                          | 3972 | 0.13% |
| Abdominal Aortic Aneurysm               | 3931 | 0.13% |
| Atrioventricular blocks                 | 3920 | 0.13% |
| Chronic Cystitis                        | 3892 | 0.12% |
| Intracerebral haemorrhage               | 3815 | 0.12% |
| Primary Malignancy: Ovary               | 3689 | 0.12% |
| Primary Malignancy: Cervix              | 3500 | 0.11% |
| Asbestosis                              | 3358 | 0.11% |
| Other haemolytic anaemias               | 3152 | 0.10% |
| Primary Malignancy: Testis              | 3133 | 0.10% |
| Thalassaemia                            | 3055 | 0.10% |
| Hypertrophic Nasal Turbinates           | 3022 | 0.10% |
| Primary Malignancy: Kidney              | 2988 | 0.10% |
| Polycythaemia vera                      | 2864 | 0.09% |
| Primary Malignancy: Oropharyngeal       | 2809 | 0.09% |
| Autoimmune liver disease                | 2792 | 0.09% |
| Ventricular tachycardia                 | 2720 | 0.09% |
| Secondary polycythaemia                 | 2625 | 0.08% |
| Posterior Uveitis                       | 2540 | 0.08% |
| Pulmonary Fibrosis                      | 2523 | 0.08% |
| Hodgkin Lymphoma                        | 2384 | 0.08% |
| Hypersplenism                           | 2362 | 0.08% |
| Dilated cardiomyopathy                  | 2359 | 0.08% |
| Primary Malignancy: Lung                | 2244 | 0.07% |
| Primary Malignancy: Thyroid             | 2172 | 0.07% |
| Rheumatic Valve Disorder                | 2034 | 0.07% |
| Secondary Malignancy_other              | 1975 | 0.06% |
| Down's syndrome                         | 1928 | 0.06% |
| Multiple valve disorder                 | 1834 | 0.06% |
| Idiopathic Intracranial Hypertension    | 1823 | 0.06% |

|                                     |      |        |
|-------------------------------------|------|--------|
| Hypertrophic Cardiomyopathy         | 1779 | 0.06%  |
| Oesophageal varices                 | 1716 | 0.06%  |
| Plasma Cell Malignancy              | 1610 | 0.05%  |
| Scleroderma                         | 1566 | 0.05%  |
| Pericardial Effusion                | 1509 | 0.05%  |
| Myasthenia gravis                   | 1407 | 0.05%  |
| Primary pulmonary hypertension      | 1345 | 0.04%  |
| Sick sinus syndrome                 | 1231 | 0.04%  |
| Aplastic anaemias                   | 1172 | 0.04%  |
| Primary Malignancy: Brain           | 1131 | 0.04%  |
| Immunodeficiencies                  | 1071 | 0.03%  |
| Cystic Fibrosis                     | 985  | 0.03%  |
| Primary Malignancy: Oesophageal     | 955  | 0.03%  |
| Myelodysplastic Syndrome            | 927  | 0.03%  |
| Portal hypertension                 | 919  | 0.03%  |
| Sickle Cell Disease                 | 887  | 0.03%  |
| Secondary pulmonary hypertension    | 824  | 0.03%  |
| Angiodysplasia of colon             | 777  | 0.02%  |
| Primary Malignancy: Bone            | 741  | 0.02%  |
| Primary Malignancy: Stomach         | 694  | 0.02%  |
| Hepatic failure                     | 632  | 0.02%  |
| Secondary Malignancy: Lymph Nodes   | 565  | 0.02%  |
| Secondary Malignancy: Liver         | 491  | 0.02%  |
| Tubulo-interstitial nephritis       | 365  | 0.01%  |
| Motor neurone disease               | 347  | 0.01%  |
| Primary Malignancy: Pancreas        | 302  | 0.01%  |
| Enteropathic arthropathy            | 291  | 0.01%  |
| Primary Malignancy: Liver           | 233  | 0.01%  |
| Secondary Malignancy: Lung          | 223  | 0.01%  |
| Secondary Malignancy: Bone          | 187  | 0.01%  |
| Primary Malignancy: Biliary Tract   | 129  | <0.01% |
| Secondary Malignancy: Brain         | 50   | <0.01% |
| Secondary Malignancy: Peritoneum    | 24   | <0.01% |
| Secondary Malignancy: Bowel         | 11   | <0.01% |
| Secondary Malignancy: Adrenal Gland | *    | <0.01% |
| Primary Malignancy: Multiple Sites  | *    | <0.01% |
| Primary Malignancy: Mesothelioma    | *    | <0.01% |
| Secondary Malignancy: Pleura        | *    | <0.01% |

\* diseases with frequency <10 suppressed as small counts

**Table A3: characteristics of the 3,060,391 ineligible patients with no incident diseases over the study period**

| <b>Patient characteristic</b> | <b>Total</b>   | <b>Percent</b> |
|-------------------------------|----------------|----------------|
| <b>Age (years)</b>            |                |                |
| 18-40                         | 1476341        | 48.2%          |
| 40-49                         | 689779         | 22.5%          |
| 50-59                         | 435517         | 14.2%          |
| 60-69                         | 291093         | 9.5%           |
| 70-79                         | 129375         | 4.2%           |
| 80+                           | 38286          | 1.3%           |
| <b>Gender</b>                 |                |                |
| Female                        | 1357049        | 44.3%          |
| Male                          | 1703284        | 55.7%          |
| Indeterminate                 | 58             | 0.0%           |
| <b>Total</b>                  | <b>3060391</b> |                |

**Table A4: distribution of yearly codes over the whole follow-up period for each condition, ordered by median**

| Disease                                          | 5 <sup>th</sup> centile | Median | 95 <sup>th</sup> centile | Mean | Standard deviation |
|--------------------------------------------------|-------------------------|--------|--------------------------|------|--------------------|
| Diabetes Mellitus_other or not specified         | 0.00                    | 2.99   | 6.88                     | 3.08 | 2.22               |
| Polymyalgia Rheumatica                           | 0.00                    | 1.05   | 6.32                     | 1.82 | 2.29               |
| Motor neurone disease                            | 0.00                    | 0.95   | 12.15                    | 2.86 | 5.41               |
| Dementia                                         | 0.00                    | 0.93   | 4.36                     | 1.39 | 1.80               |
| Type 2 Diabetes Mellitus                         | 0.00                    | 0.89   | 4.59                     | 1.41 | 1.73               |
| Type 1 Diabetes Mellitus                         | 0.00                    | 0.88   | 6.31                     | 1.71 | 2.41               |
| Depression                                       | 0.00                    | 0.83   | 4.54                     | 1.36 | 1.76               |
| COPD                                             | 0.00                    | 0.77   | 3.77                     | 1.17 | 1.43               |
| Heart failure                                    | 0.00                    | 0.73   | 5.48                     | 1.46 | 2.21               |
| Rheumatoid Arthritis                             | 0.00                    | 0.70   | 5.50                     | 1.43 | 2.23               |
| Primary Malignancy_Mesothelioma                  | 0.00                    | 0.67   | 9.16                     | 1.78 | 3.18               |
| Primary Malignancy_Pancreas                      | 0.00                    | 0.67   | 13.41                    | 2.63 | 5.12               |
| Primary Malignancy_Brain                         | 0.00                    | 0.66   | 10.60                    | 2.15 | 3.96               |
| Primary Malignancy_Oesophageal                   | 0.00                    | 0.64   | 10.86                    | 2.44 | 4.95               |
| Myasthenia gravis                                | 0.00                    | 0.62   | 5.61                     | 1.48 | 2.66               |
| Multiple sclerosis                               | 0.00                    | 0.59   | 5.63                     | 1.40 | 2.41               |
| Parkinson's disease                              | 0.00                    | 0.59   | 4.52                     | 1.20 | 1.77               |
| Vitamin B12 deficiency anaemia                   | 0.00                    | 0.56   | 4.60                     | 1.24 | 1.67               |
| Bipolar affective disorder and mania             | 0.00                    | 0.56   | 4.99                     | 1.30 | 2.15               |
| Plasma Cell Malignancy                           | 0.00                    | 0.54   | 10.32                    | 2.15 | 4.67               |
| Hypertension                                     | 0.00                    | 0.54   | 2.95                     | 0.88 | 1.12               |
| Atrial Fibrillation                              | 0.00                    | 0.51   | 3.47                     | 0.97 | 1.47               |
| Primary Malignancy_Prostate                      | 0.00                    | 0.51   | 6.11                     | 1.46 | 2.48               |
| Intellectual disability                          | 0.00                    | 0.49   | 5.19                     | 1.47 | 1.91               |
| Primary Malignancy_Lung                          | 0.00                    | 0.45   | 8.17                     | 1.73 | 3.55               |
| Primary Malignancy_Biliary Tract                 | 0.00                    | 0.45   | 8.96                     | 1.89 | 4.73               |
| Giant Cell arteritis                             | 0.00                    | 0.44   | 5.73                     | 1.36 | 2.47               |
| Crohn's disease                                  | 0.00                    | 0.42   | 5.41                     | 1.24 | 2.32               |
| Primary Malignancy_Breast                        | 0.00                    | 0.39   | 5.25                     | 1.21 | 2.47               |
| Hodgkin Lymphoma                                 | 0.00                    | 0.38   | 5.41                     | 1.24 | 2.55               |
| Ulcerative colitis                               | 0.00                    | 0.38   | 4.27                     | 1.00 | 1.87               |
| Primary Malignancy_Oropharyngeal                 | 0.00                    | 0.37   | 6.84                     | 1.44 | 2.95               |
| Non-Hodgkin Lymphoma                             | 0.00                    | 0.37   | 5.52                     | 1.22 | 2.53               |
| Leukaemia                                        | 0.00                    | 0.37   | 5.19                     | 1.17 | 2.58               |
| Secondary Malignancy_Brain                       | 0.00                    | 0.37   | 7.68                     | 1.45 | 2.74               |
| Stroke_not otherwise specified                   | 0.00                    | 0.34   | 2.11                     | 0.59 | 0.89               |
| Idiopathic Intracranial Hypertension             | 0.00                    | 0.34   | 3.81                     | 0.92 | 1.76               |
| Thyroid Disease                                  | 0.00                    | 0.33   | 2.56                     | 0.68 | 1.16               |
| Asthma                                           | 0.00                    | 0.32   | 2.33                     | 0.63 | 0.99               |
| Primary Malignancy_Stomach                       | 0.00                    | 0.32   | 6.93                     | 1.45 | 3.30               |
| Chronic primary pain                             | 0.00                    | 0.32   | 3.23                     | 0.79 | 1.34               |
| Coronary Heart Disease (not otherwise specified) | 0.00                    | 0.31   | 2.02                     | 0.56 | 0.85               |
| Epilepsy                                         | 0.00                    | 0.31   | 3.66                     | 0.92 | 1.95               |
| Psoriatic Arthritis                              | 0.00                    | 0.30   | 3.68                     | 0.87 | 1.63               |

|                                   |      |      |      |      |      |
|-----------------------------------|------|------|------|------|------|
| Chronic Fatigue Syndrome          | 0.00 | 0.29 | 3.22 | 0.76 | 1.31 |
| Primary Malignancy_Bowel          | 0.00 | 0.29 | 5.25 | 1.15 | 2.88 |
| Anxiety disorders                 | 0.00 | 0.29 | 2.99 | 0.73 | 1.29 |
| Primary Malignancy_Thyroid        | 0.00 | 0.28 | 4.05 | 0.88 | 1.76 |
| Personality disorders             | 0.00 | 0.28 | 4.35 | 0.99 | 2.05 |
| Schizophrenia                     | 0.00 | 0.27 | 3.36 | 0.78 | 1.52 |
| Primary Malignancy_Cervix         | 0.00 | 0.27 | 5.26 | 1.17 | 2.77 |
| Autoimmune liver disease          | 0.00 | 0.26 | 3.63 | 0.85 | 1.82 |
| Myelodysplastic Syndrome          | 0.00 | 0.26 | 4.88 | 1.15 | 2.95 |
| Bronchiectasis                    | 0.00 | 0.24 | 3.03 | 0.70 | 1.31 |
| Hyperkinetic disorders            | 0.00 | 0.24 | 3.11 | 0.72 | 1.34 |
| Primary Malignancy_Ovary          | 0.00 | 0.24 | 6.15 | 1.24 | 2.87 |
| Primary Malignancy_Liver          | 0.00 | 0.23 | 3.64 | 0.95 | 2.99 |
| Coeliac disease                   | 0.00 | 0.23 | 2.13 | 0.52 | 0.85 |
| Lupus Erythematosus               | 0.00 | 0.22 | 3.52 | 0.83 | 1.87 |
| Myocardial Infarction             | 0.00 | 0.21 | 2.44 | 0.58 | 1.04 |
| Primary Malignancy_Bone           | 0.00 | 0.21 | 4.03 | 0.97 | 3.29 |
| Secondary Malignancy_other        | 0.00 | 0.21 | 5.92 | 1.18 | 2.65 |
| Peripheral Vascular Disease       | 0.00 | 0.20 | 2.73 | 0.75 | 2.53 |
| Ankylosing spondylitis            | 0.00 | 0.20 | 3.00 | 0.69 | 1.47 |
| Primary Malignancy_Bladder        | 0.00 | 0.20 | 4.38 | 0.90 | 2.05 |
| Primary Malignancy_Testis         | 0.00 | 0.20 | 3.58 | 0.81 | 1.50 |
| Sarcoidosis                       | 0.00 | 0.19 | 3.36 | 0.72 | 1.53 |
| Abdominal Hernia                  | 0.00 | 0.19 | 1.55 | 0.40 | 0.68 |
| Secondary Malignancy_Peritoneum   | 0.00 | 0.19 | 4.21 | 1.30 | 3.31 |
| Scleroderma                       | 0.00 | 0.19 | 3.00 | 0.71 | 1.88 |
| Primary Malignancy_Melanoma       | 0.00 | 0.18 | 3.06 | 0.67 | 1.71 |
| Gout                              | 0.00 | 0.17 | 1.74 | 0.43 | 0.73 |
| Barrett's oesophagus              | 0.00 | 0.16 | 1.40 | 0.35 | 0.57 |
| Glomerulonephritis                | 0.00 | 0.16 | 3.26 | 0.74 | 1.69 |
| Osteoporosis                      | 0.00 | 0.15 | 1.52 | 0.38 | 0.65 |
| Primary Malignancy_Uterus         | 0.00 | 0.15 | 3.90 | 0.81 | 2.16 |
| Cirrhosis                         | 0.00 | 0.15 | 2.88 | 0.63 | 1.40 |
| Diabetic Eye Disease              | 0.00 | 0.15 | 1.61 | 0.40 | 0.68 |
| Intracerebral haemorrhage         | 0.00 | 0.15 | 2.58 | 0.56 | 1.10 |
| Primary Malignancy_Kidney         | 0.00 | 0.14 | 2.93 | 0.66 | 1.67 |
| Dilated cardiomyopathy            | 0.00 | 0.14 | 1.99 | 0.46 | 0.93 |
| Eating Disorders                  | 0.00 | 0.14 | 4.03 | 0.84 | 2.38 |
| Abdominal Aortic Aneurysm         | 0.00 | 0.00 | 1.35 | 0.26 | 0.58 |
| Acne                              | 0.00 | 0.00 | 1.26 | 0.30 | 0.50 |
| Alcohol Misuse                    | 0.00 | 0.00 | 0.94 | 0.20 | 0.66 |
| Alcoholic liver disease           | 0.00 | 0.00 | 1.90 | 0.42 | 1.09 |
| Allergic and chronic rhinitis     | 0.00 | 0.00 | 0.56 | 0.10 | 0.27 |
| Alopecia areata                   | 0.00 | 0.00 | 0.87 | 0.17 | 0.45 |
| Anaemia_other                     | 0.00 | 0.00 | 1.49 | 0.33 | 0.78 |
| Angiodysplasia of colon           | 0.00 | 0.00 | 0.87 | 0.17 | 0.49 |
| Anterior and Intermediate Uveitis | 0.00 | 0.00 | 1.18 | 0.25 | 0.66 |
| Aplastic anaemias                 | 0.00 | 0.00 | 2.19 | 0.47 | 1.42 |
| Asbestosis                        | 0.00 | 0.00 | 0.96 | 0.20 | 0.65 |
| Atrioventricular blocks           | 0.00 | 0.00 | 0.64 | 0.11 | 0.33 |

|                                         |      |      |      |      |      |
|-----------------------------------------|------|------|------|------|------|
| Autism and Asperger's syndrome          | 0.00 | 0.00 | 1.10 | 0.25 | 0.58 |
| Autonomic Neuropathy                    | 0.00 | 0.00 | 2.46 | 0.47 | 1.34 |
| Benign Prostatic Hyperplasia            | 0.00 | 0.00 | 1.08 | 0.25 | 0.50 |
| Benign essential tremor                 | 0.00 | 0.00 | 1.11 | 0.22 | 0.53 |
| Cardiomyopathy_other                    | 0.00 | 0.00 | 1.94 | 0.41 | 0.90 |
| Cataract                                | 0.00 | 0.00 | 1.16 | 0.27 | 0.50 |
| Cerebral Palsy                          | 0.00 | 0.00 | 0.73 | 0.16 | 0.48 |
| Chronic Cystitis                        | 0.00 | 0.00 | 1.88 | 0.37 | 1.03 |
| Chronic Kidney Disease                  | 0.00 | 0.00 | 1.16 | 0.26 | 0.65 |
| Chronic sinusitis                       | 0.00 | 0.00 | 0.72 | 0.13 | 0.39 |
| Chronic viral hepatitis                 | 0.00 | 0.00 | 1.89 | 0.40 | 0.90 |
| Collapsed vertebra                      | 0.00 | 0.00 | 1.64 | 0.34 | 0.77 |
| Congenital Septal Defect                | 0.00 | 0.00 | 1.21 | 0.24 | 0.62 |
| Cystic Fibrosis                         | 0.00 | 0.00 | 2.21 | 0.31 | 1.00 |
| Dermatitis                              | 0.00 | 0.00 | 0.76 | 0.15 | 0.43 |
| Diabetic Neuropathy                     | 0.00 | 0.00 | 1.62 | 0.38 | 1.44 |
| Diaphragmatic hernia                    | 0.00 | 0.00 | 0.81 | 0.17 | 0.38 |
| Diverticular Disease                    | 0.00 | 0.00 | 0.96 | 0.20 | 0.51 |
| Down's syndrome                         | 0.00 | 0.00 | 0.48 | 0.10 | 0.19 |
| Dysmenorrhoea                           | 0.00 | 0.00 | 0.78 | 0.15 | 0.38 |
| Endometrial hyperplasia and hypertrophy | 0.00 | 0.00 | 0.90 | 0.17 | 0.57 |
| Endometriosis                           | 0.00 | 0.00 | 2.08 | 0.44 | 1.06 |
| Enteropathic arthropathy                | 0.00 | 0.00 | 1.28 | 0.38 | 0.99 |
| Enthesopathy and synovial disorder      | 0.00 | 0.00 | 0.86 | 0.18 | 0.43 |
| Fatty Liver                             | 0.00 | 0.00 | 0.75 | 0.14 | 0.34 |
| Fibromatosis                            | 0.00 | 0.00 | 0.85 | 0.17 | 0.39 |
| Folate deficiency anaemia               | 0.00 | 0.00 | 0.52 | 0.09 | 0.25 |
| Gastritis and duodenitis                | 0.00 | 0.00 | 0.73 | 0.14 | 0.39 |
| Gastro-oesophageal reflux disease       | 0.00 | 0.00 | 0.88 | 0.18 | 0.43 |
| Glaucoma                                | 0.00 | 0.00 | 1.46 | 0.31 | 0.62 |
| HIV                                     | 0.00 | 0.00 | 2.07 | 0.41 | 0.92 |
| Hearing loss                            | 0.00 | 0.00 | 0.77 | 0.16 | 0.34 |
| Hepatic failure                         | 0.00 | 0.00 | 2.22 | 0.46 | 1.07 |
| Hidradenitis suppurativa                | 0.00 | 0.00 | 1.92 | 0.43 | 1.11 |
| Hyperparathyroidism                     | 0.00 | 0.00 | 1.84 | 0.41 | 0.84 |
| Hypersplenism                           | 0.00 | 0.00 | 0.99 | 0.21 | 0.58 |
| Hypertrophic Cardiomyopathy             | 0.00 | 0.00 | 2.23 | 0.49 | 1.00 |
| Hypertrophic Nasal Turbinates           | 0.00 | 0.00 | 0.28 | 0.04 | 0.16 |
| Hyposplenism                            | 0.00 | 0.00 | 1.50 | 0.34 | 0.71 |
| Immunodeficiencies                      | 0.00 | 0.00 | 1.62 | 0.36 | 1.11 |
| Intervertebral disc disorders           | 0.00 | 0.00 | 1.75 | 0.36 | 0.91 |
| Irritable bowel syndrome                | 0.00 | 0.00 | 0.66 | 0.13 | 0.32 |
| Ischaemic stroke                        | 0.00 | 0.00 | 2.03 | 0.46 | 0.99 |
| Left bundle branch block                | 0.00 | 0.00 | 0.77 | 0.15 | 0.39 |
| Macular degeneration                    | 0.00 | 0.00 | 1.16 | 0.25 | 0.71 |
| Meniere's Disease                       | 0.00 | 0.00 | 1.58 | 0.33 | 0.77 |
| Migraine                                | 0.00 | 0.00 | 1.21 | 0.25 | 0.61 |
| Multiple valve disorder                 | 0.00 | 0.00 | 0.49 | 0.09 | 0.33 |
| Neuropathic Bladder                     | 0.00 | 0.00 | 0.74 | 0.15 | 0.36 |

|                                        |      |      |      |      |      |
|----------------------------------------|------|------|------|------|------|
| Nonrheumatic aortic valve disorders    | 0.00 | 0.00 | 1.42 | 0.31 | 0.68 |
| Nonrheumatic mitral valve disorders    | 0.00 | 0.00 | 0.84 | 0.16 | 0.52 |
| Obesity                                | 0.00 | 0.00 | 0.71 | 0.15 | 0.44 |
| Obsessive-compulsive disorder          | 0.00 | 0.00 | 2.55 | 0.56 | 1.21 |
| Obstructive and reflux uropathy        | 0.00 | 0.00 | 1.10 | 0.23 | 0.63 |
| Oesophageal varices                    | 0.00 | 0.00 | 1.62 | 0.38 | 0.74 |
| Osteoarthritis (excl spine)            | 0.00 | 0.00 | 1.53 | 0.34 | 0.70 |
| Other haemolytic anaemias              | 0.00 | 0.00 | 3.09 | 0.62 | 1.64 |
| Pancreatitis                           | 0.00 | 0.00 | 2.00 | 0.44 | 1.09 |
| Pericardial Effusion                   | 0.00 | 0.00 | 1.12 | 0.21 | 0.56 |
| Peripheral Neuropathy                  | 0.00 | 0.00 | 1.22 | 0.26 | 0.81 |
| Pleural effusion                       | 0.00 | 0.00 | 1.55 | 0.32 | 0.90 |
| Pleural plaque                         | 0.00 | 0.00 | 0.74 | 0.14 | 0.48 |
| Polycystic ovarian syndrome            | 0.00 | 0.00 | 0.86 | 0.20 | 0.34 |
| Polycythaemia vera                     | 0.00 | 0.00 | 2.49 | 0.54 | 1.30 |
| Portal hypertension                    | 0.00 | 0.00 | 0.91 | 0.18 | 0.46 |
| Posterior Uveitis                      | 0.00 | 0.00 | 1.46 | 0.33 | 1.02 |
| Primary Malignancy_Multiple Sites      | 0.00 | 0.00 | 0.00 | 0.00 | 0.00 |
| Primary Malignancy_Skin                | 0.00 | 0.00 | 1.30 | 0.31 | 0.78 |
| Primary Malignancy_other               | 0.00 | 0.00 | 4.42 | 0.90 | 2.44 |
| Primary Thrombocytopaenia              | 0.00 | 0.00 | 2.41 | 0.59 | 1.96 |
| Primary pulmonary hypertension         | 0.00 | 0.00 | 1.62 | 0.32 | 1.00 |
| Psoriasis                              | 0.00 | 0.00 | 1.44 | 0.32 | 0.75 |
| Pulmonary Fibrosis                     | 0.00 | 0.00 | 2.38 | 0.53 | 1.34 |
| Raynaud's syndrome                     | 0.00 | 0.00 | 0.85 | 0.16 | 0.45 |
| Retinal vascular occlusions            | 0.00 | 0.00 | 1.93 | 0.42 | 0.93 |
| Rheumatic Valve Disorder               | 0.00 | 0.00 | 0.70 | 0.13 | 0.41 |
| Right bundle branch block combinations | 0.00 | 0.00 | 0.47 | 0.08 | 0.25 |
| Rosacea                                | 0.00 | 0.00 | 0.93 | 0.20 | 0.41 |
| Scleritis and episcleritis             | 0.00 | 0.00 | 0.70 | 0.13 | 0.49 |
| Seborrheic dermatitis                  | 0.00 | 0.00 | 0.61 | 0.11 | 0.31 |
| Secondary Malignancy_Adrenal Gland     | 0.00 | 0.00 | 1.68 | 0.42 | 1.01 |
| Secondary Malignancy_Bone              | 0.00 | 0.00 | 4.78 | 0.93 | 2.34 |
| Secondary Malignancy_Bowel             | 0.00 | 0.00 | 6.36 | 1.41 | 2.42 |
| Secondary Malignancy_Liver             | 0.00 | 0.00 | 4.82 | 0.91 | 2.26 |
| Secondary Malignancy_Lung              | 0.00 | 0.00 | 6.04 | 1.10 | 2.27 |
| Secondary Malignancy_Lymph Nodes       | 0.00 | 0.00 | 2.40 | 0.40 | 1.31 |
| Secondary Malignancy_Pleura            | 0.00 | 0.00 | 5.69 | 0.94 | 2.50 |
| Secondary Thrombocytopaenia            | 0.00 | 0.00 | 0.89 | 0.19 | 0.48 |
| Secondary polycythaemia                | 0.00 | 0.00 | 1.64 | 0.32 | 0.78 |
| Secondary pulmonary hypertension       | 0.00 | 0.00 | 1.29 | 0.27 | 0.83 |
| Sick sinus syndrome                    | 0.00 | 0.00 | 0.79 | 0.14 | 0.40 |
| Sickle Cell Disease                    | 0.00 | 0.00 | 0.98 | 0.29 | 1.07 |
| Sjogren's Syndrome                     | 0.00 | 0.00 | 1.48 | 0.31 | 0.68 |
| Sleep apnoea                           | 0.00 | 0.00 | 0.92 | 0.19 | 0.43 |
| Spina bifida                           | 0.00 | 0.00 | 0.48 | 0.11 | 0.44 |
| Spinal stenosis                        | 0.00 | 0.00 | 2.34 | 0.50 | 1.06 |
| Spondylolisthesis                      | 0.00 | 0.00 | 1.22 | 0.23 | 0.63 |
| Spondylosis                            | 0.00 | 0.00 | 1.01 | 0.21 | 0.57 |
| Stable Angina                          | 0.00 | 0.00 | 1.62 | 0.37 | 0.78 |

|                                         |      |      |      |      |      |
|-----------------------------------------|------|------|------|------|------|
| Subarachnoid haemorrhage                | 0.00 | 0.00 | 2.41 | 0.51 | 1.05 |
| Substance Misuse                        | 0.00 | 0.00 | 1.42 | 0.32 | 1.34 |
| Supraventricular tachycardia            | 0.00 | 0.00 | 1.55 | 0.35 | 0.78 |
| Thalassaemia                            | 0.00 | 0.00 | 0.31 | 0.05 | 0.19 |
| Thrombophilia                           | 0.00 | 0.00 | 0.75 | 0.15 | 0.53 |
| Tinnitus                                | 0.00 | 0.00 | 0.85 | 0.17 | 0.43 |
| Transient ischaemic attack              | 0.00 | 0.00 | 1.56 | 0.35 | 0.70 |
| Trigeminal neuralgia                    | 0.00 | 0.00 | 2.16 | 0.47 | 1.05 |
| Tubulo-interstitial nephritis           | 0.00 | 0.00 | 2.70 | 0.50 | 1.23 |
| Unstable Angina                         | 0.00 | 0.00 | 1.17 | 0.23 | 0.58 |
| Urinary Incontinence                    | 0.00 | 0.00 | 0.87 | 0.18 | 0.38 |
| Venous thromboembolic disease (Excl PE) | 0.00 | 0.00 | 1.85 | 0.41 | 1.05 |
| Ventricular tachycardia                 | 0.00 | 0.00 | 1.64 | 0.32 | 0.75 |
| Visual impairment and blindness         | 0.00 | 0.00 | 0.73 | 0.13 | 0.31 |
| Vitiligo                                | 0.00 | 0.00 | 0.73 | 0.14 | 0.32 |



**Figure A1: Boxplots of observed and expected mean yearly codes at a GP practice level for QOF conditions in year 1 (A) and year 2 (B) and non-QOF conditions in year 1 (C) and year 2 (D) following diagnosis**

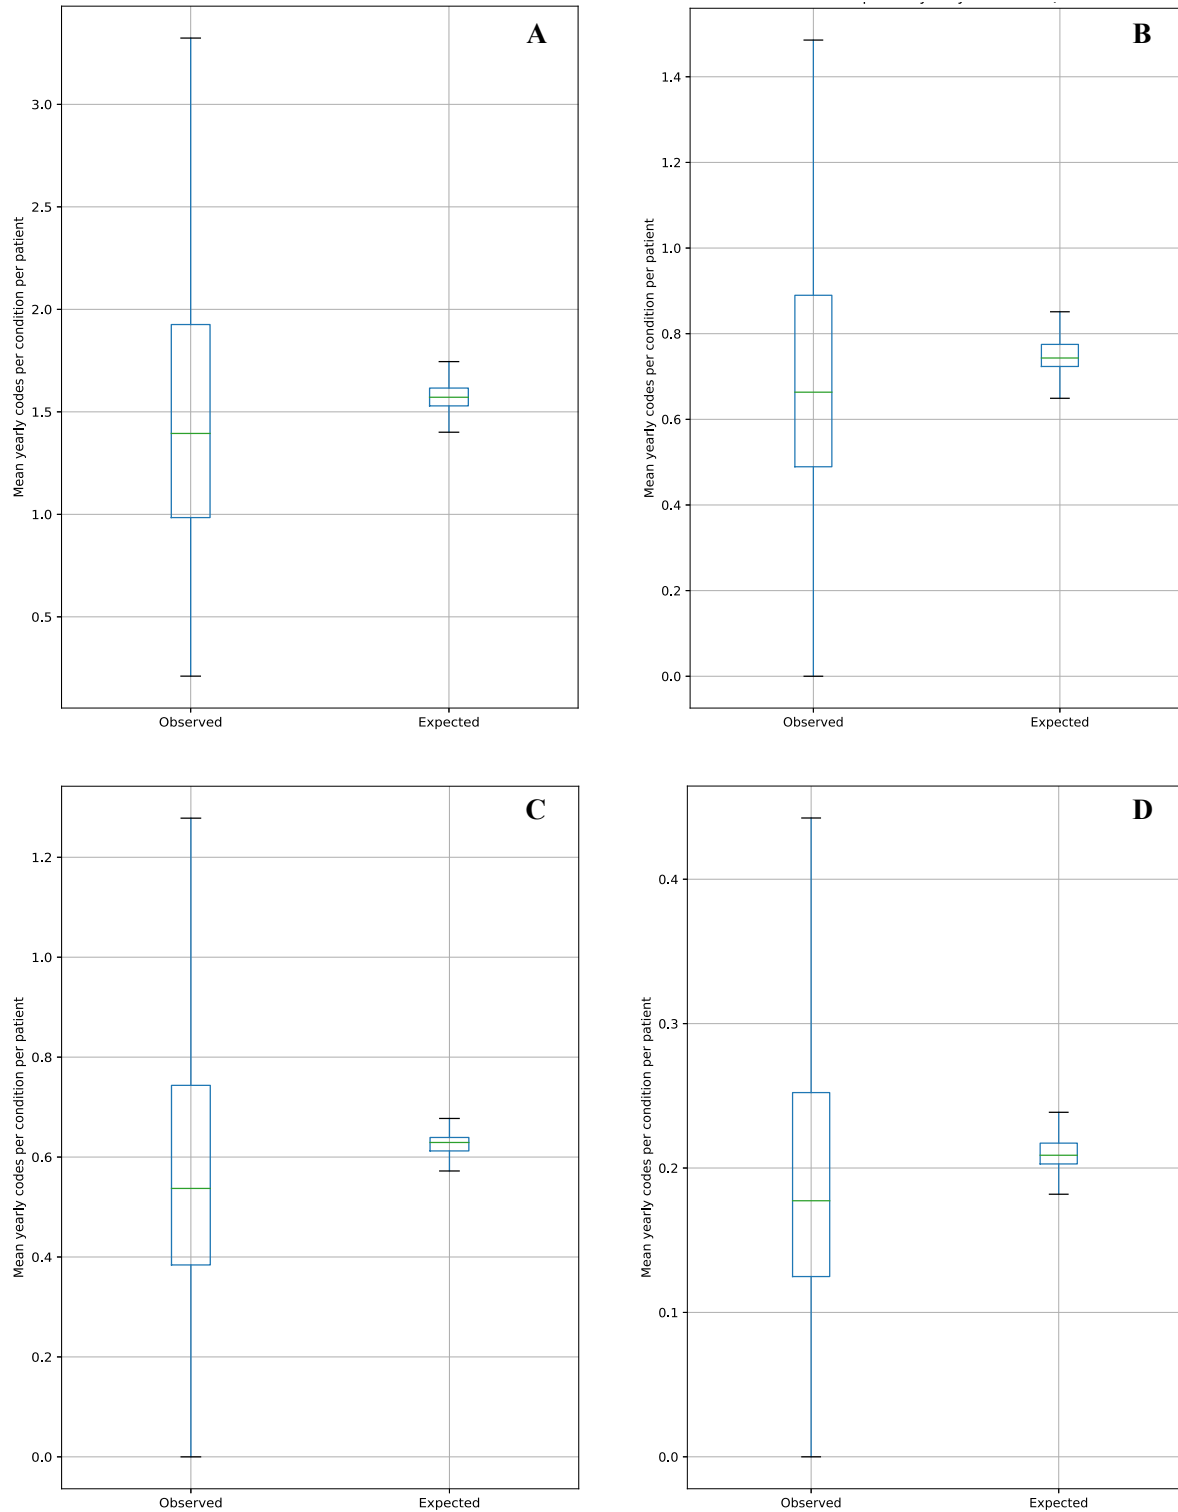

**Figure A2: ratio of mean yearly codes in year 1 following diagnosis to subsequent years for QOF conditions**

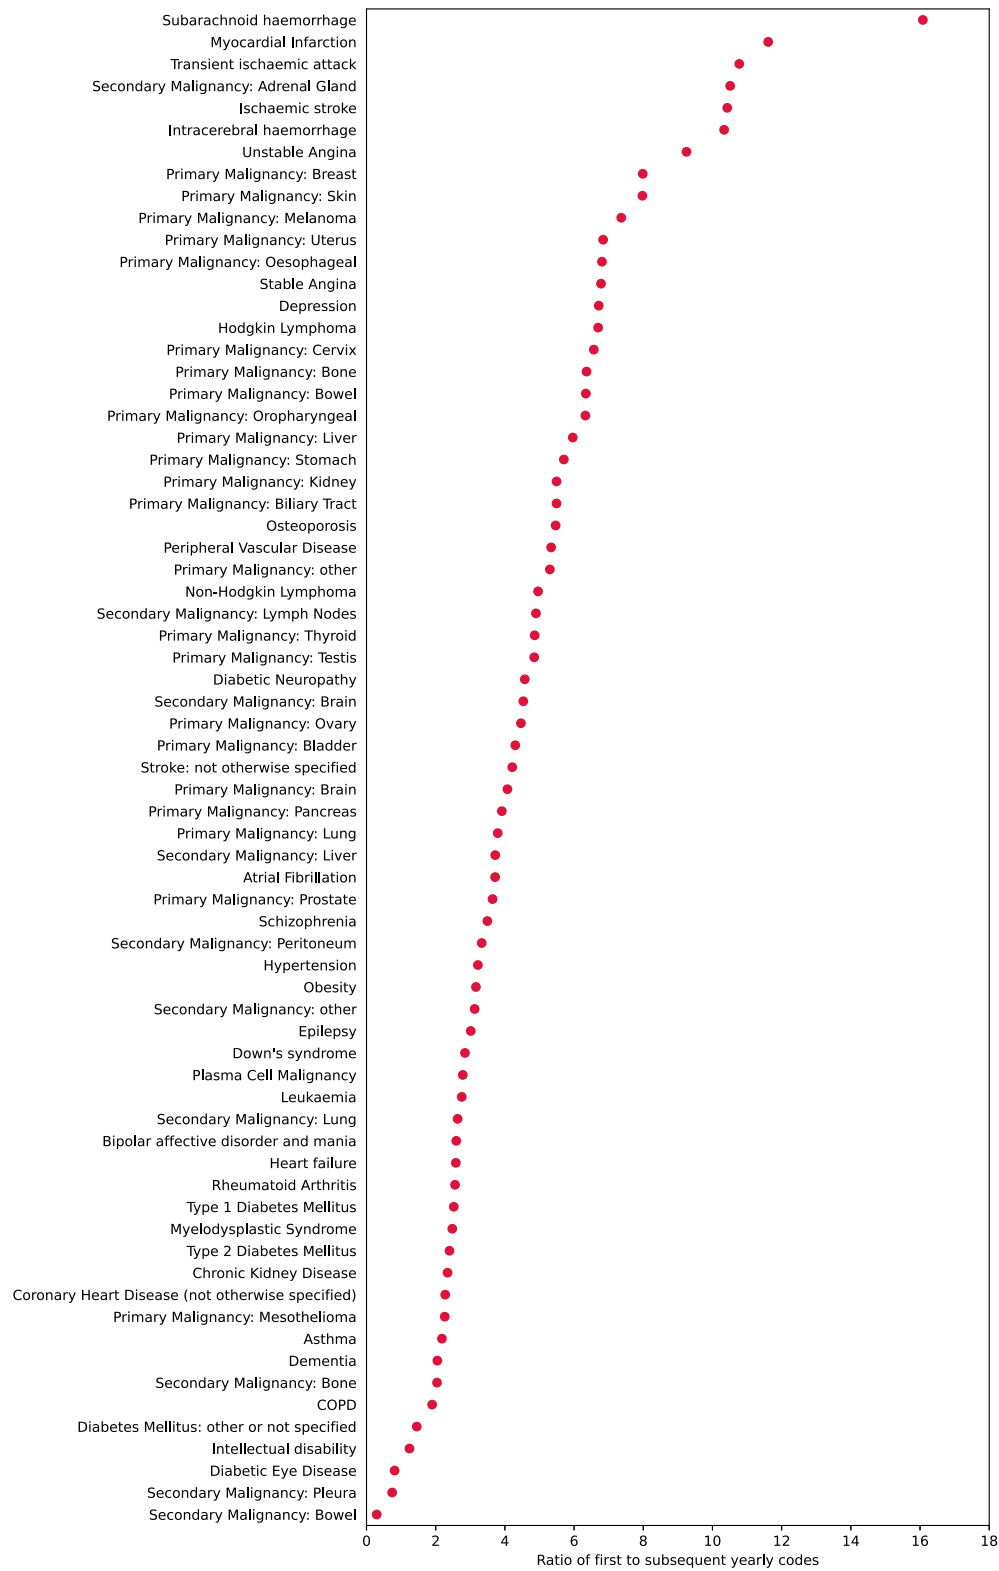

**Figure A3: Ratio of mean yearly codes in year 1 following diagnosis to subsequent years for non-QOF conditions**

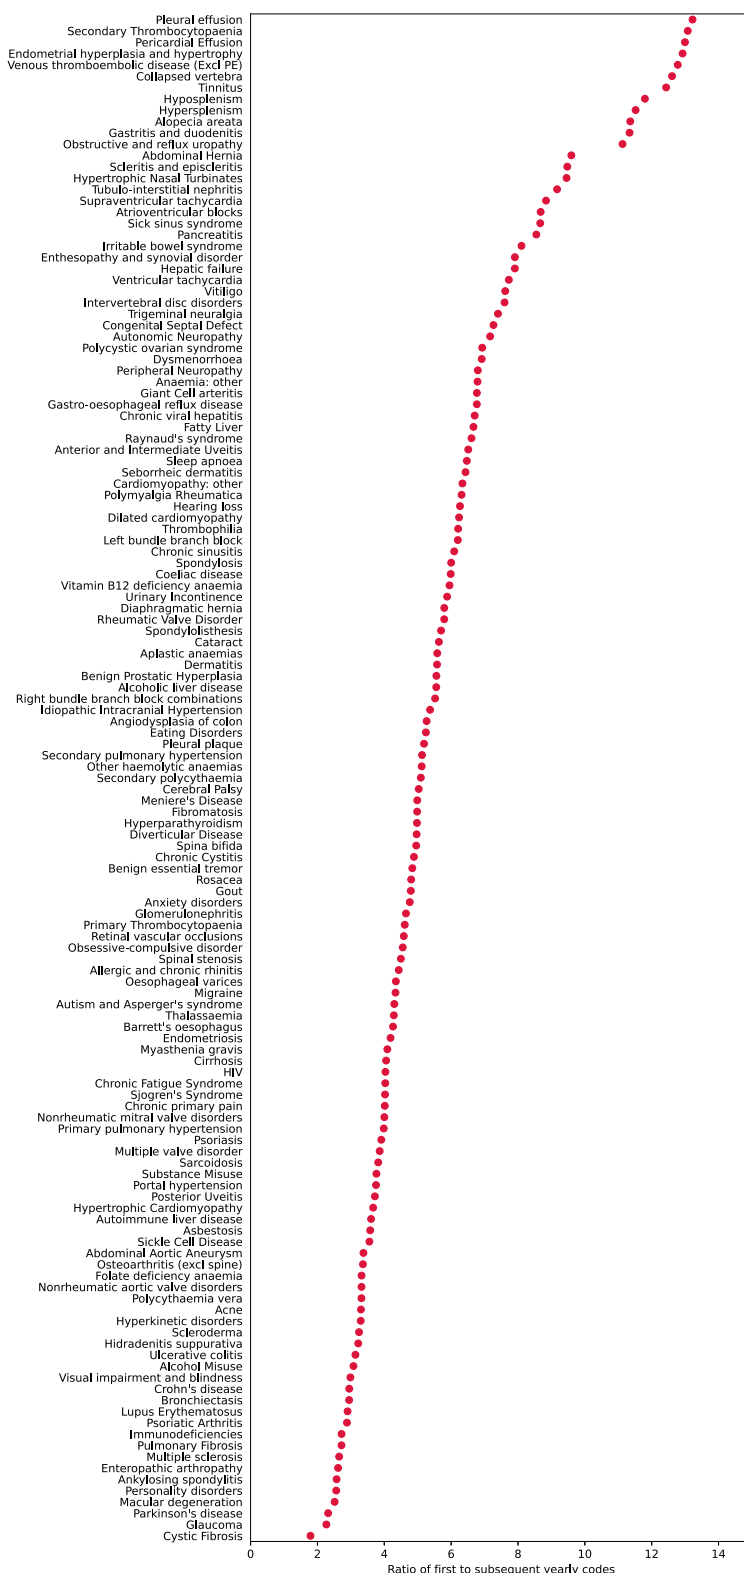

**Figure A4: Boxplots of the distribution of mean yearly codes following diagnosis for newly diagnosed conditions by GP practice stratified by inclusion in QOF**

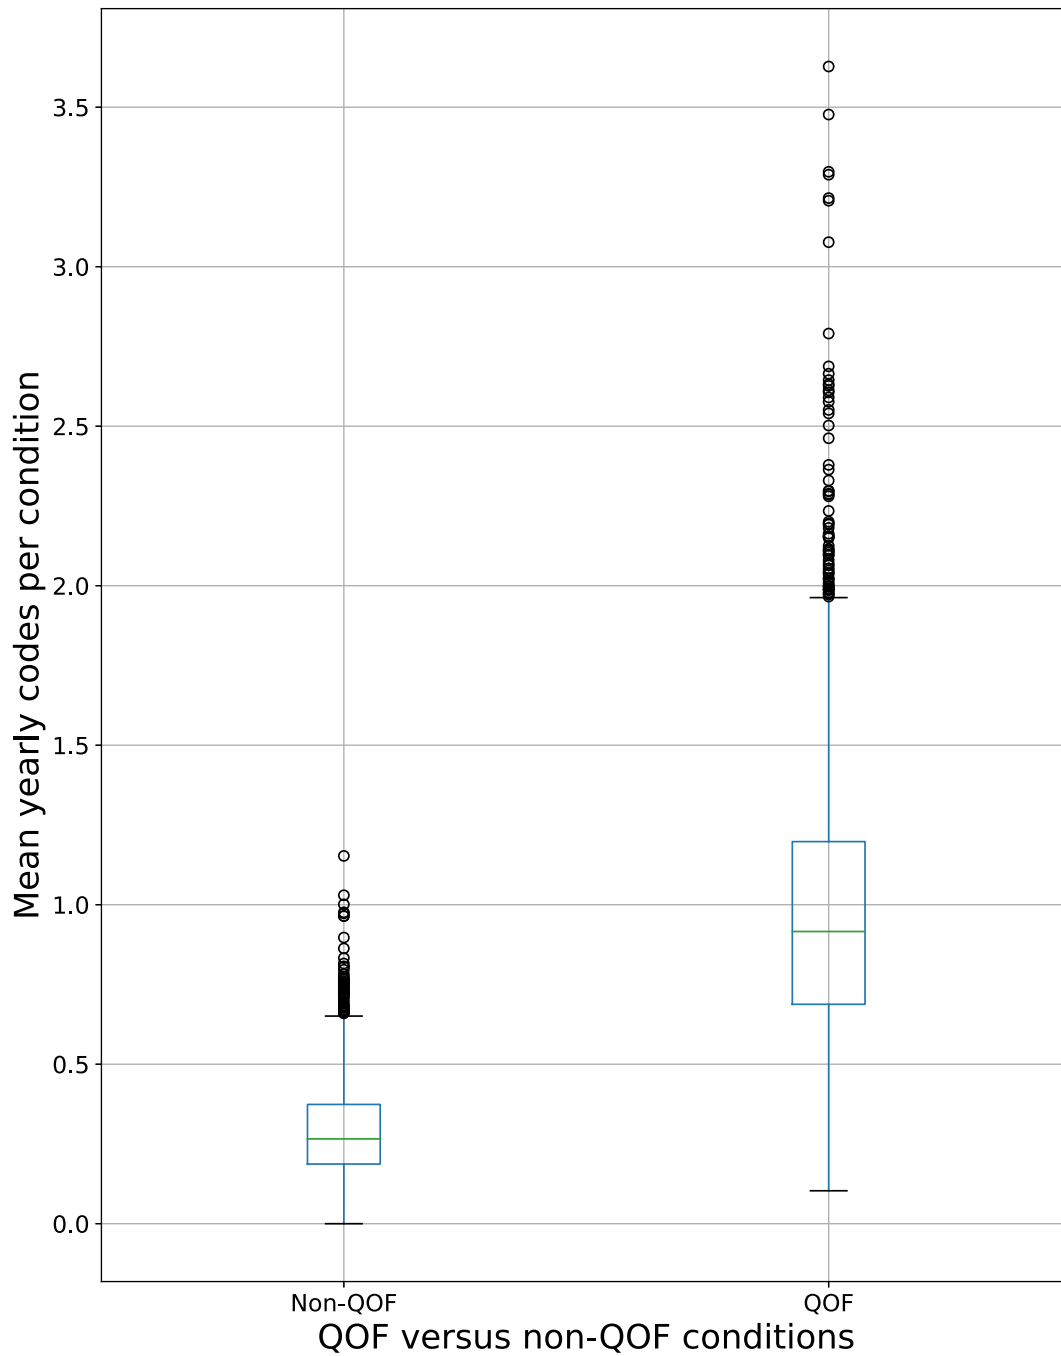

**Figure A5: boxplots of mean yearly codes at a GP practice level by practice level Index of Multiple Deprivation decile (1 = most deprived, 10 = least deprived)**

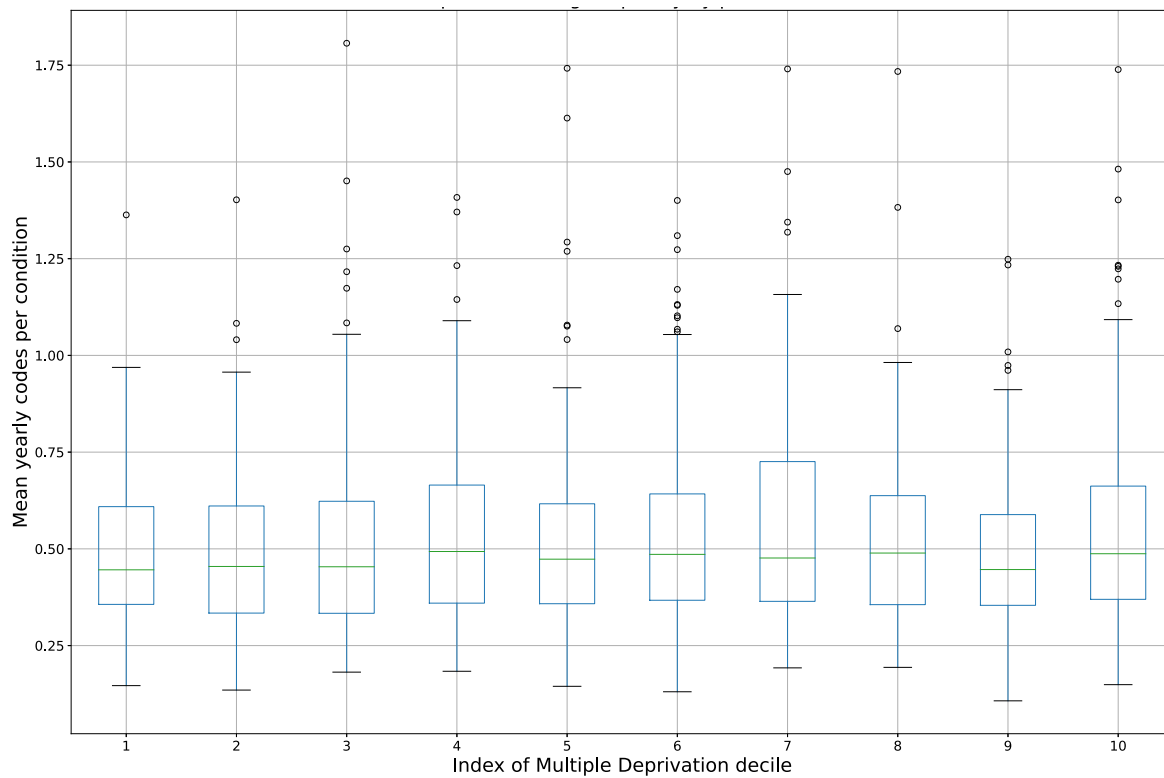

Footnote: combines QOF and non-QOF conditions

**Table A5: Associations of rate of codes in year one following diagnosis for conditions included in QOF (N=1730485)**

| Variable                                         | Primary analysis |         |        |       | Sensitivity analysis including consultation number |         |        |       |
|--------------------------------------------------|------------------|---------|--------|-------|----------------------------------------------------|---------|--------|-------|
|                                                  | IRR              | P-value | 95% CI |       | IRR                                                | P-value | 95% CI |       |
|                                                  |                  |         | Lower  | Upper |                                                    |         | Lower  | Upper |
| <b>Age category (years)</b>                      |                  |         |        |       |                                                    |         |        |       |
| Under 40                                         | 1.33             | 0.00    | 1.32   | 1.34  | 1.30                                               | 0.00    | 1.29   | 1.31  |
| 40-49                                            | 1.15             | 0.00    | 1.14   | 1.15  | 1.14                                               | 0.00    | 1.13   | 1.15  |
| 50-59                                            | 1.08             | 0.00    | 1.07   | 1.08  | 1.07                                               | 0.00    | 1.07   | 1.08  |
| 60-69 (reference)                                | -                | -       | -      | -     | -                                                  | -       | -      | -     |
| 70-79                                            | 0.96             | 0.00    | 0.95   | 0.96  | 0.94                                               | 0.00    | 0.93   | 0.95  |
| 80 or more                                       | 0.91             | 0.00    | 0.90   | 0.92  | 0.88                                               | 0.00    | 0.87   | 0.88  |
| <b>Sex</b>                                       |                  |         |        |       |                                                    |         |        |       |
| Female (reference)                               | -                | -       | -      | -     | -                                                  | -       | -      | -     |
| Male                                             | 1.03             | 0.00    | 1.02   | 1.03  | 1.10                                               | 0.00    | 1.10   | 1.11  |
| <b>Ethnicity category</b>                        |                  |         |        |       |                                                    |         |        |       |
| White (reference)                                | -                | -       | -      | -     | -                                                  | -       | -      | -     |
| South Asian                                      | 0.96             | 0.00    | 0.95   | 0.97  | 0.92                                               | 0.00    | 0.91   | 0.93  |
| Black                                            | 0.94             | 0.00    | 0.93   | 0.95  | 0.94                                               | 0.00    | 0.93   | 0.95  |
| Other                                            | 0.95             | 0.00    | 0.93   | 0.97  | 0.96                                               | 0.00    | 0.94   | 0.98  |
| Mixed                                            | 0.98             | 0.03    | 0.95   | 1.00  | 0.97                                               | 0.00    | 0.95   | 0.99  |
| Missing                                          | 0.98             | 0.00    | 0.97   | 0.99  | 1.01                                               | 0.00    | 1.00   | 1.02  |
| <b>IMD decile</b>                                |                  |         |        |       |                                                    |         |        |       |
| 1 (most deprived)                                | -                | -       | -      | -     | -                                                  | -       | -      | -     |
| 2                                                | 1.01             | 0.19    | 1.00   | 1.01  | 1.00                                               | 0.95    | 0.99   | 1.01  |
| 3                                                | 1.02             | 0.00    | 1.01   | 1.03  | 1.01                                               | 0.08    | 1.00   | 1.02  |
| 4                                                | 1.02             | 0.00    | 1.01   | 1.03  | 1.01                                               | 0.01    | 1.00   | 1.02  |
| 5                                                | 1.02             | 0.00    | 1.01   | 1.03  | 1.01                                               | 0.06    | 1.00   | 1.02  |
| 6                                                | 1.03             | 0.00    | 1.02   | 1.04  | 1.01                                               | 0.02    | 1.00   | 1.02  |
| 7                                                | 1.04             | 0.00    | 1.03   | 1.05  | 1.02                                               | 0.00    | 1.01   | 1.03  |
| 8                                                | 1.04             | 0.00    | 1.03   | 1.05  | 1.01                                               | 0.01    | 1.00   | 1.02  |
| 9                                                | 1.05             | 0.00    | 1.04   | 1.06  | 1.02                                               | 0.00    | 1.01   | 1.03  |
| 10 (least deprived)                              | 1.05             | 0.00    | 1.04   | 1.06  | 1.01                                               | 0.06    | 1.00   | 1.02  |
| <b>Number of QOF diseases</b>                    |                  |         |        |       |                                                    |         |        |       |
| 0 (reference)                                    | -                | -       | -      | -     | -                                                  | -       | -      | -     |
| 1                                                | 0.90             | 0.00    | 0.90   | 0.91  | 0.87                                               | 0.00    | 0.86   | 0.87  |
| 2                                                | 0.80             | 0.00    | 0.80   | 0.81  | 0.75                                               | 0.00    | 0.75   | 0.76  |
| 3                                                | 0.71             | 0.00    | 0.70   | 0.71  | 0.66                                               | 0.00    | 0.65   | 0.66  |
| 4 or more                                        | 0.63             | 0.00    | 0.62   | 0.63  | 0.56                                               | 0.00    | 0.55   | 0.56  |
| <b>Number of non-QOF diseases</b>                |                  |         |        |       |                                                    |         |        |       |
| 0 (reference)                                    | -                | -       | -      | -     | -                                                  | -       | -      | -     |
| 1                                                | 1.16             | 0.00    | 1.16   | 1.17  | 1.08                                               | 0.00    | 1.07   | 1.08  |
| 2                                                | 1.13             | 0.00    | 1.12   | 1.14  | 1.02                                               | 0.00    | 1.01   | 1.02  |
| 3                                                | 1.12             | 0.00    | 1.11   | 1.12  | 0.97                                               | 0.00    | 0.96   | 0.98  |
| 4 or more                                        | 1.13             | 0.00    | 1.12   | 1.13  | 0.90                                               | 0.00    | 0.89   | 0.90  |
| <b>Calendar year of diagnosis</b>                |                  |         |        |       |                                                    |         |        |       |
| 2015 (reference)                                 | -                | -       | -      | -     | -                                                  | -       | -      | -     |
| 2016                                             | 1.00             | 0.89    | 0.99   | 1.01  | 1.02                                               | 0.00    | 1.02   | 1.03  |
| 2017                                             | 1.00             | 0.34    | 1.00   | 1.01  | 1.05                                               | 0.00    | 1.04   | 1.05  |
| 2018                                             | 1.00             | 0.18    | 0.99   | 1.00  | 1.06                                               | 0.00    | 1.06   | 1.07  |
| 2019                                             | 0.95             | 0.00    | 0.94   | 0.96  | 1.04                                               | 0.00    | 1.04   | 1.05  |
| <b>Average number of consultations in year 1</b> |                  |         |        |       |                                                    |         |        |       |
| Less than 1 (reference)                          | -                | -       | -      | -     | -                                                  | -       | -      | -     |
| 1-2                                              | -                | -       | -      | -     | 1.62                                               | 0.00    | 1.60   | 1.63  |
| 3-4                                              | -                | -       | -      | -     | 2.21                                               | 0.00    | 2.19   | 2.23  |
| 5-9                                              | -                | -       | -      | -     | 2.87                                               | 0.00    | 2.84   | 2.89  |
| 10 or more                                       | -                | -       | -      | -     | 3.75                                               | 0.00    | 3.71   | 3.79  |

From negative binomial regression models, including practice-level fixed effects (not shown)

**Table A6: Associations of rate of codes in year two following diagnosis for conditions included in QOF (N=1714684)**

| Variable                                         | Primary analysis |         |       |       | Sensitivity analysis including consultation number |         |       |       |
|--------------------------------------------------|------------------|---------|-------|-------|----------------------------------------------------|---------|-------|-------|
|                                                  | 95% CI           |         |       |       | 95% CI                                             |         |       |       |
|                                                  | IRR              | P-value | Lower | Upper | IRR                                                | P-value | Lower | Upper |
| <b>Age category (years)</b>                      |                  |         |       |       |                                                    |         |       |       |
| Under 40                                         | 0.87             | 0.00    | 0.86  | 0.87  | 0.86                                               | 0.00    | 0.86  | 0.87  |
| 40-49                                            | 1.01             | 0.03    | 1.00  | 1.02  | 1.01                                               | 0.22    | 1.00  | 1.01  |
| 50-59                                            | 1.03             | 0.00    | 1.02  | 1.04  | 1.03                                               | 0.00    | 1.02  | 1.04  |
| 60-69 (reference)                                | -                | -       | -     | -     | -                                                  | -       | -     | -     |
| 70-79                                            | 0.95             | 0.00    | 0.94  | 0.96  | 0.93                                               | 0.00    | 0.93  | 0.94  |
| 80 or more                                       | 0.89             | 0.00    | 0.88  | 0.90  | 0.86                                               | 0.00    | 0.85  | 0.87  |
| <b>Sex</b>                                       |                  |         |       |       |                                                    |         |       |       |
| Female (reference)                               | -                | -       | -     | -     | -                                                  | -       | -     | -     |
| Male                                             | 1.11             | 0.00    | 1.11  | 1.12  | 1.18                                               | 0.00    | 1.17  | 1.18  |
| <b>Ethnicity category</b>                        |                  |         |       |       |                                                    |         |       |       |
| White (reference)                                | -                | -       | -     | -     | -                                                  | -       | -     | -     |
| South Asian                                      | 1.26             | 0.00    | 1.25  | 1.28  | 1.22                                               | 0.00    | 1.20  | 1.23  |
| Black                                            | 1.17             | 0.00    | 1.16  | 1.19  | 1.17                                               | 0.00    | 1.15  | 1.19  |
| Other                                            | 1.13             | 0.00    | 1.10  | 1.16  | 1.14                                               | 0.00    | 1.11  | 1.17  |
| Mixed                                            | 1.12             | 0.00    | 1.08  | 1.15  | 1.11                                               | 0.00    | 1.07  | 1.14  |
| Missing                                          | 0.89             | 0.00    | 0.88  | 0.90  | 0.93                                               | 0.00    | 0.92  | 0.93  |
| <b>IMD decile</b>                                |                  |         |       |       |                                                    |         |       |       |
| 1 (most deprived)                                | -                | -       | -     | -     | -                                                  | -       | -     | -     |
| 2                                                | 1.02             | 0.00    | 1.01  | 1.04  | 1.02                                               | 0.00    | 1.01  | 1.03  |
| 3                                                | 1.03             | 0.00    | 1.02  | 1.05  | 1.03                                               | 0.00    | 1.02  | 1.04  |
| 4                                                | 1.05             | 0.00    | 1.03  | 1.06  | 1.04                                               | 0.00    | 1.03  | 1.05  |
| 5                                                | 1.05             | 0.00    | 1.04  | 1.07  | 1.04                                               | 0.00    | 1.03  | 1.06  |
| 6                                                | 1.06             | 0.00    | 1.05  | 1.07  | 1.05                                               | 0.00    | 1.04  | 1.07  |
| 7                                                | 1.08             | 0.00    | 1.06  | 1.09  | 1.06                                               | 0.00    | 1.05  | 1.08  |
| 8                                                | 1.09             | 0.00    | 1.07  | 1.10  | 1.07                                               | 0.00    | 1.06  | 1.08  |
| 9                                                | 1.11             | 0.00    | 1.10  | 1.13  | 1.09                                               | 0.00    | 1.08  | 1.11  |
| 10 (least deprived)                              | 1.14             | 0.00    | 1.12  | 1.15  | 1.11                                               | 0.00    | 1.09  | 1.12  |
| <b>Number of QOF diseases</b>                    |                  |         |       |       |                                                    |         |       |       |
| 0 (reference)                                    | -                | -       | -     | -     | -                                                  | -       | -     | -     |
| 1                                                | 1.05             | 0.00    | 1.04  | 1.06  | 1.00                                               | 0.79    | 0.99  | 1.01  |
| 2                                                | 1.07             | 0.00    | 1.06  | 1.08  | 0.99                                               | 0.05    | 0.98  | 1.00  |
| 3                                                | 0.99             | 0.15    | 0.98  | 1.00  | 0.91                                               | 0.00    | 0.90  | 0.92  |
| 4 or more                                        | 0.87             | 0.00    | 0.86  | 0.88  | 0.77                                               | 0.00    | 0.76  | 0.78  |
| <b>Number of non-QOF diseases</b>                |                  |         |       |       |                                                    |         |       |       |
| 0 (reference)                                    | -                | -       | -     | -     | -                                                  | -       | -     | -     |
| 1                                                | 1.05             | 0.00    | 1.04  | 1.06  | 0.99                                               | 0.11    | 0.98  | 1.00  |
| 2                                                | 1.04             | 0.00    | 1.03  | 1.05  | 0.96                                               | 0.00    | 0.95  | 0.97  |
| 3                                                | 1.04             | 0.00    | 1.03  | 1.05  | 0.93                                               | 0.00    | 0.92  | 0.94  |
| 4 or more                                        | 1.05             | 0.00    | 1.04  | 1.06  | 0.88                                               | 0.00    | 0.87  | 0.89  |
| <b>Calendar year of diagnosis</b>                |                  |         |       |       |                                                    |         |       |       |
| 2015 (reference)                                 | -                | -       | -     | -     | -                                                  | -       | -     | -     |
| 2016                                             | 1.00             | 0.45    | 0.99  | 1.01  | 1.02                                               | 0.00    | 1.01  | 1.03  |
| 2017                                             | 0.99             | 0.00    | 0.98  | 0.99  | 1.02                                               | 0.00    | 1.01  | 1.03  |
| 2018                                             | 0.91             | 0.00    | 0.90  | 0.92  | 0.96                                               | 0.00    | 0.95  | 0.97  |
| 2019                                             | 0.79             | 0.00    | 0.79  | 0.80  | 0.86                                               | 0.00    | 0.86  | 0.87  |
| <b>Average number of consultations in year 1</b> |                  |         |       |       |                                                    |         |       |       |
| Less than 1 (reference)                          | -                | -       | -     | -     | -                                                  | -       | -     | -     |
| 2                                                |                  |         |       |       | 1.53                                               | 0.00    | 1.52  | 1.55  |
| 3-4                                              |                  |         |       |       | 1.87                                               | 0.00    | 1.85  | 1.89  |
| 5-9                                              |                  |         |       |       | 2.17                                               | 0.00    | 2.15  | 2.20  |
| 10 or more                                       |                  |         |       |       | 2.59                                               | 0.00    | 2.57  | 2.62  |

From negative binomial regression models, including practice-level fixed effects (not shown)

**Table A7: Associations of rate of codes in year one following diagnosis for conditions not included in QOF (N=3617348)**

| Variable                                         | Primary analysis |         |        |       | Sensitivity analysis including consultation number |         |        |       |
|--------------------------------------------------|------------------|---------|--------|-------|----------------------------------------------------|---------|--------|-------|
|                                                  | IRR              | P-value | 95% CI |       | IRR                                                | P-value | 95% CI |       |
|                                                  |                  |         | Lower  | Upper |                                                    |         | Lower  | Upper |
| <b>Age category (years)</b>                      |                  |         |        |       |                                                    |         |        |       |
| Under 40                                         | 1.10             | 0.00    | 1.10   | 1.11  | 1.09                                               | 0.00    | 1.08   | 1.10  |
| 40-49                                            | 1.01             | 0.00    | 1.00   | 1.02  | 1.02                                               | 0.00    | 1.01   | 1.03  |
| 50-59                                            | 0.98             | 0.00    | 0.98   | 0.99  | 0.99                                               | 0.09    | 0.99   | 1.00  |
| 60-69 (reference)                                | -                | -       | -      | -     | -                                                  | -       | -      | -     |
| 70-79                                            | 1.05             | 0.00    | 1.05   | 1.06  | 1.03                                               | 0.00    | 1.02   | 1.03  |
| 80 or more                                       | 1.02             | 0.00    | 1.02   | 1.03  | 0.98                                               | 0.00    | 0.97   | 0.99  |
| <b>Sex</b>                                       |                  |         |        |       |                                                    |         |        |       |
| Female (reference)                               | -                | -       | -      | -     | -                                                  | -       | -      | -     |
| Male                                             | 1.00             | 0.03    | 0.99   | 1.00  | 1.13                                               | 0.00    | 1.12   | 1.13  |
| <b>Ethnicity category</b>                        |                  |         |        |       |                                                    |         |        |       |
| White (reference)                                | -                | -       | -      | -     | -                                                  | -       | -      | -     |
| South Asian                                      | 0.95             | 0.00    | 0.94   | 0.96  | 0.89                                               | 0.00    | 0.88   | 0.90  |
| Black                                            | 0.89             | 0.00    | 0.88   | 0.90  | 0.86                                               | 0.00    | 0.85   | 0.87  |
| Other                                            | 0.90             | 0.00    | 0.88   | 0.91  | 0.89                                               | 0.00    | 0.88   | 0.91  |
| Mixed                                            | 0.95             | 0.00    | 0.93   | 0.97  | 0.92                                               | 0.00    | 0.91   | 0.94  |
| Missing                                          | 0.99             | 0.14    | 0.99   | 1.00  | 1.06                                               | 0.00    | 1.05   | 1.06  |
| <b>IMD decile</b>                                |                  |         |        |       |                                                    |         |        |       |
| 1 (most deprived)                                | -                | -       | -      | -     | -                                                  | -       | -      | -     |
| 2                                                | 1.00             | 0.86    | 0.99   | 1.01  | 0.99                                               | 0.06    | 0.98   | 1.00  |
| 3                                                | 1.01             | 0.01    | 1.00   | 1.02  | 1.00                                               | 0.82    | 0.99   | 1.01  |
| 4                                                | 1.02             | 0.00    | 1.01   | 1.03  | 1.00                                               | 0.42    | 0.99   | 1.01  |
| 5                                                | 1.02             | 0.00    | 1.01   | 1.03  | 1.00                                               | 0.86    | 0.99   | 1.01  |
| 6                                                | 1.03             | 0.00    | 1.02   | 1.04  | 0.99                                               | 0.26    | 0.99   | 1.00  |
| 7                                                | 1.03             | 0.00    | 1.02   | 1.04  | 0.99                                               | 0.08    | 0.98   | 1.00  |
| 8                                                | 1.04             | 0.00    | 1.03   | 1.06  | 0.99                                               | 0.15    | 0.98   | 1.00  |
| 9                                                | 1.06             | 0.00    | 1.05   | 1.07  | 0.99                                               | 0.19    | 0.98   | 1.00  |
| 10 (least deprived)                              | 1.06             | 0.00    | 1.05   | 1.07  | 0.98                                               | 0.00    | 0.97   | 0.99  |
| <b>Number of QOF diseases</b>                    |                  |         |        |       |                                                    |         |        |       |
| 0 (reference)                                    | -                | -       | -      | -     | -                                                  | -       | -      | -     |
| 1                                                | 1.16             | 0.00    | 1.15   | 1.16  | 1.02                                               | 0.00    | 1.02   | 1.03  |
| 2                                                | 1.09             | 0.00    | 1.08   | 1.09  | 0.94                                               | 0.00    | 0.93   | 0.94  |
| 3                                                | 1.06             | 0.00    | 1.05   | 1.07  | 0.90                                               | 0.00    | 0.89   | 0.91  |
| 4 or more                                        | 1.04             | 0.00    | 1.03   | 1.04  | 0.85                                               | 0.00    | 0.84   | 0.85  |
| <b>Number of non-QOF diseases</b>                |                  |         |        |       |                                                    |         |        |       |
| 0 (reference)                                    | -                | -       | -      | -     | -                                                  | -       | -      | -     |
| 1                                                | 1.02             | 0.00    | 1.01   | 1.02  | 0.93                                               | 0.00    | 0.92   | 0.94  |
| 2                                                | 1.02             | 0.00    | 1.02   | 1.03  | 0.87                                               | 0.00    | 0.87   | 0.88  |
| 3                                                | 1.04             | 0.00    | 1.03   | 1.05  | 0.83                                               | 0.00    | 0.82   | 0.84  |
| 4 or more                                        | 1.06             | 0.00    | 1.06   | 1.07  | 0.74                                               | 0.00    | 0.74   | 0.75  |
| <b>Calendar year of diagnosis</b>                |                  |         |        |       |                                                    |         |        |       |
| 2015 (reference)                                 | -                | -       | -      | -     | -                                                  | -       | -      | -     |
| 2016                                             | 1.00             | 0.55    | 0.99   | 1.00  | 1.03                                               | 0.00    | 1.02   | 1.03  |
| 2017                                             | 0.99             | 0.00    | 0.99   | 1.00  | 1.05                                               | 0.00    | 1.04   | 1.05  |
| 2018                                             | 0.99             | 0.00    | 0.98   | 0.99  | 1.07                                               | 0.00    | 1.06   | 1.07  |
| 2019                                             | 0.94             | 0.00    | 0.94   | 0.95  | 1.06                                               | 0.00    | 1.06   | 1.07  |
| <b>Average number of consultations in year 1</b> |                  |         |        |       |                                                    |         |        |       |
| Less than 1 (reference)                          | -                | -       | -      | -     | -                                                  | -       | -      | -     |
| 1-2                                              |                  |         |        |       | 2.38                                               | 0.00    | 2.36   | 2.40  |
| 3-4                                              |                  |         |        |       | 3.49                                               | 0.00    | 3.45   | 3.52  |
| 5-9                                              |                  |         |        |       | 4.67                                               | 0.00    | 4.62   | 4.71  |
| 10 or more                                       |                  |         |        |       | 6.37                                               | 0.00    | 6.31   | 6.44  |

From negative binomial regression models, including practice-level fixed effects (not shown)



**Table A8: Associations of rate of codes in year two following diagnosis for conditions not included in QOF (N=3593019)**

| Variable                                         | Primary analysis |         |        |       | Sensitivity analysis including consultation number |         |        |       |
|--------------------------------------------------|------------------|---------|--------|-------|----------------------------------------------------|---------|--------|-------|
|                                                  | IRR              | P-value | 95% CI |       | IRR                                                | P-value | 95% CI |       |
|                                                  |                  |         | Lower  | Upper |                                                    |         | Lower  | Upper |
| <b>Age category (years)</b>                      |                  |         |        |       |                                                    |         |        |       |
| Under 40                                         | 1.27             | 0.00    | 1.26   | 1.28  | 1.26                                               | 0.00    | 1.25   | 1.28  |
| 40-49                                            | 1.03             | 0.00    | 1.02   | 1.04  | 1.03                                               | 0.00    | 1.02   | 1.04  |
| 50-59                                            | 0.98             | 0.00    | 0.97   | 0.99  | 0.99                                               | 0.10    | 0.98   | 1.00  |
| 60-69 (reference)                                | -                | -       | -      | -     | -                                                  | -       | -      | -     |
| 70-79                                            | 1.06             | 0.00    | 1.05   | 1.07  | 1.03                                               | 0.00    | 1.02   | 1.04  |
| 80 or more                                       | 1.06             | 0.00    | 1.05   | 1.08  | 1.01                                               | 0.18    | 1.00   | 1.02  |
| <b>Sex</b>                                       |                  |         |        |       |                                                    |         |        |       |
| Female (reference)                               | -                | -       | -      | -     | -                                                  | -       | -      | -     |
| Male                                             | 0.93             | 0.00    | 0.93   | 0.94  | 1.08                                               | 0.00    | 1.07   | 1.09  |
| <b>Ethnicity category</b>                        |                  |         |        |       |                                                    |         |        |       |
| White (reference)                                | -                | -       | -      | -     | -                                                  | -       | -      | -     |
| South Asian                                      | 0.99             | 0.17    | 0.97   | 1.00  | 0.92                                               | 0.00    | 0.91   | 0.94  |
| Black                                            | 0.94             | 0.00    | 0.92   | 0.95  | 0.91                                               | 0.00    | 0.89   | 0.92  |
| Other                                            | 0.88             | 0.00    | 0.86   | 0.91  | 0.89                                               | 0.00    | 0.86   | 0.92  |
| Mixed                                            | 0.94             | 0.00    | 0.91   | 0.98  | 0.92                                               | 0.00    | 0.89   | 0.95  |
| Missing                                          | 0.96             | 0.00    | 0.95   | 0.97  | 1.05                                               | 0.00    | 1.03   | 1.06  |
| <b>IMD decile</b>                                |                  |         |        |       |                                                    |         |        |       |
| 1 (most deprived)                                | -                | -       | -      | -     | -                                                  | -       | -      | -     |
| 2                                                | 1.01             | 0.10    | 1.00   | 1.03  | 1.00                                               | 0.79    | 0.99   | 1.02  |
| 3                                                | 1.03             | 0.00    | 1.02   | 1.05  | 1.02                                               | 0.00    | 1.01   | 1.04  |
| 4                                                | 1.04             | 0.00    | 1.02   | 1.05  | 1.02                                               | 0.01    | 1.01   | 1.04  |
| 5                                                | 1.05             | 0.00    | 1.04   | 1.07  | 1.03                                               | 0.00    | 1.01   | 1.04  |
| 6                                                | 1.06             | 0.00    | 1.04   | 1.08  | 1.03                                               | 0.00    | 1.01   | 1.04  |
| 7                                                | 1.07             | 0.00    | 1.06   | 1.09  | 1.03                                               | 0.00    | 1.01   | 1.05  |
| 8                                                | 1.10             | 0.00    | 1.08   | 1.11  | 1.04                                               | 0.00    | 1.03   | 1.06  |
| 9                                                | 1.13             | 0.00    | 1.11   | 1.14  | 1.06                                               | 0.00    | 1.04   | 1.08  |
| 10 (least deprived)                              | 1.14             | 0.00    | 1.12   | 1.16  | 1.06                                               | 0.00    | 1.04   | 1.08  |
| <b>Number of QOF diseases</b>                    |                  |         |        |       |                                                    |         |        |       |
| 0 (reference)                                    | -                | -       | -      | -     | -                                                  | -       | -      | -     |
| 1                                                | 1.19             | 0.00    | 1.18   | 1.21  | 1.05                                               | 0.00    | 1.04   | 1.06  |
| 2                                                | 1.15             | 0.00    | 1.14   | 1.16  | 0.98                                               | 0.00    | 0.97   | 0.99  |
| 3                                                | 1.13             | 0.00    | 1.12   | 1.15  | 0.95                                               | 0.00    | 0.94   | 0.96  |
| 4 or more                                        | 1.16             | 0.00    | 1.14   | 1.17  | 0.93                                               | 0.00    | 0.92   | 0.94  |
| <b>Number of non-QOF diseases</b>                |                  |         |        |       |                                                    |         |        |       |
| 0 (reference)                                    | -                | -       | -      | -     | -                                                  | -       | -      | -     |
| 1                                                | 1.04             | 0.00    | 1.03   | 1.06  | 0.94                                               | 0.00    | 0.93   | 0.95  |
| 2                                                | 1.09             | 0.00    | 1.08   | 1.11  | 0.90                                               | 0.00    | 0.89   | 0.91  |
| 3                                                | 1.13             | 0.00    | 1.11   | 1.14  | 0.86                                               | 0.00    | 0.85   | 0.87  |
| 4 or more                                        | 1.21             | 0.00    | 1.20   | 1.23  | 0.80                                               | 0.00    | 0.79   | 0.81  |
| <b>Calendar year of diagnosis</b>                |                  |         |        |       |                                                    |         |        |       |
| 2015 (reference)                                 | -                | -       | -      | -     | -                                                  | -       | -      | -     |
| 2016                                             | 1.00             | 0.56    | 0.99   | 1.01  | 1.03                                               | 0.00    | 1.02   | 1.04  |
| 2017                                             | 1.00             | 0.43    | 0.99   | 1.01  | 1.06                                               | 0.00    | 1.05   | 1.07  |
| 2018                                             | 0.91             | 0.00    | 0.90   | 0.92  | 1.01                                               | 0.01    | 1.00   | 1.02  |
| 2019                                             | 0.79             | 0.00    | 0.79   | 0.80  | 0.93                                               | 0.00    | 0.92   | 0.94  |
| <b>Average number of consultations in year 1</b> |                  |         |        |       |                                                    |         |        |       |
| Less than 1 (reference)                          | -                | -       | -      | -     | -                                                  | -       | -      | -     |
| 1-2                                              |                  |         |        |       | 2.76                                               | 0.00    | 2.72   | 2.81  |
| 3-4                                              |                  |         |        |       | 4.06                                               | 0.00    | 4.00   | 4.12  |
| 5-9                                              |                  |         |        |       | 5.40                                               | 0.00    | 5.32   | 5.48  |
| 10 or more                                       |                  |         |        |       | 7.35                                               | 0.00    | 7.24   | 7.47  |

From negative binomial regression models, including practice-level fixed effects (not shown)

## References

1. Head, A. *et al.* Inequalities in incident and prevalent multimorbidity in England, 2004–2013;19: a population-based, descriptive study. *The Lancet Healthy Longevity* **2**, e489–e497 (2021).
2. Kuan, V. *et al.* A chronological map of 308 physical and mental health conditions from 4 million individuals in the English National Health Service. *The Lancet Digital Health* **1**, e63–e77 (2019).
3. Bisquera, A. *et al.* Inequalities in developing multimorbidity over time: A population-based cohort study from an urban, multi-ethnic borough in the United Kingdom. *Lancet Reg Health Eur* **12**, 100247 (2021).
4. Ashworth, M. *et al.* Journey to multimorbidity: longitudinal analysis exploring cardiovascular risk factors and sociodemographic determinants in an urban setting. *BMJ Open* **9**, (2019).
5. NHS Health and Social Care Information Centre. National Quality and Outcomes Framework Statistics for England 2004/05.  
<https://files.digital.nhs.uk/publicationimport/pub01xxx/pub01946/qof-eng-04-05-rep.pdf>.
6. Health & Social Care Information Centre. Quality and Outcomes Framework – Prevalence, Achievements and Exceptions Report. England, 2013-14.  
<https://files.digital.nhs.uk/publicationimport/pub15xxx/pub15751/qof-1314-report-v1.1.pdf>.
7. Health & Social Care Information Centre. Quality and Outcomes Framework – Prevalence, Achievements and Exceptions Report, England, 2014-15.  
<https://files.digital.nhs.uk/publicationimport/pub18xxx/pub18887/qof-1415-report%20v1.1.pdf> (2015).
